# Supplementary material for: Integrative Transcriptomic Analysis Reveals the Immune Mechanism for a CyHV-3-Resistant Common Carp Strain
Source: Front Immunol. 2021 Jul 5;12:687151. doi: 10.3389/fimmu.2021.687151 (PMC8287582; doi:10.3389/fimmu.2021.687151)
Supplement: Supplementary file 5 [file Table_4.xlsx]

## Sheet: Sheet1
Gene Usage	Gene ID	gene name	Primers	Comparison	Related comparison group name for involved DEG	Fold change in qPCR	Fold change in DGE	R	R^2
Tested gene	cycg027270.1	IFI	F: 5'TCAGCGTTGCTCCTCAAACT 3'	severely sick fish vs survivors from the breeding strain, down-regulated	SvI-B&N		2.14563	0.964219	0.929719
			R: 5'GACAGTTCCACATCCCCCAG 3'	survivors from the breeding strain vs survivors from the non-breeding strain, up-regulated		2.22377	2.50346
Tested gene	cycg027942.1	Ig light chain	F: 5'AACTAAACTGCTGCTCGATCTC 3'	severely sick fish vs survivors from the breeding strain, down-regulated	SvI-B&N		3.565
			R: 5'CCCTGTGGAGAGTAAGAGCTGA 3'	survivors from the breeding strain vs survivors from the non-breeding strain, up-regulated		4.67371	4.88104
Tested gene	cycg029742.1	IL1R	F: 5'TTAGGCGCTCGTTTGGTGAT 3'	severely sick fish vs survivors from the non-breeding strain, down-regulated	SvI-B&N		4.2845
			R: 5'CGTCCACGCAGGTAAGAGTT 3'	survivors vs control in the non-breeding strain, up-regulated	SvC-N	1.96776	2.12636
				survivors vs control in the breeding strain, down-regulated	SvC-B	2.61958	2.99385
				survivors from the breeding strain vs survivors from the non-breeding strain, down-regulated	SvS-BvN-D7	3.6534	5.15516
Tested gene	cycg033439.1	C3	F: 5'ATCTCTGGGTTGACGTTTGGG 3'	survivors vs control in the breeding strain, down-regulated	SvC-B	3.43456	3.56923
			R: 5'CTGGGTTTGTGGAAGAAGCAAG 3'	survivors from the breeding strain vs survivors from the non-breeding strain, down-regulated	SvS-BvN-D7	7.03256	6.91083
Tested gene	cycg038034.1	TIP	F: 5'AAGCAGATGACCGGGAGAAG 3'	survivors vs control in the breeding strain, down-regulated	SvC-B	6.28148	6.52427
			R: 5'GACACATCACCACAACACTCCA 3'
Tested gene	cycg049285.1	IL-1B2-1	F: 5'TTTGTGAAGATGCGCTGCTC 3'	survivors from the breeding strain vs survivors from the non-breeding strain, down-regulated	SvS-BvN-D7	8.28065	8.00868
			R: 5'GCTGAATTGAAGGTAAGTCTGTG 3'
Tested gene	cycg049297.1	IL-1B	F: 5'AGAAACCGGCACACGTTACA 3'	severely sick fish vs survivors from the breeding strain, down-regulated	SvI-B&N		4.29313
			R: 5'AGTTTGTGGTTCGGGTGGTT 3'	survivors vs control in the non-breeding strain, up-regulated	SvC-N	4.01408	4.23884
				survivors from the breeding strain vs survivors from the non-breeding strain, down-regulated	SvS-BvN-D7	4.19165	5.70529
Tested gene	cycg050603.1	LRR-containing proteins	F: 5'TGCTTTCTGATCGGTCTGGG 3'	survivors vs control in the non-breeding strain, down-regulated	SvC-N	4.83441	4.71251
			R: 5'GATGAACCACACGGTCAATCG 3'
Tested gene	cycg010656.1	IL1R	F: 5'CACTGCAGAGACGCAACAAA 3'	severely sick fish vs survivors from the non-breeding strain, down-regulated	SvI-B&N		4.68007
			R: 5'AATCTGCATATTTGTCACTGTGTAA 3'	survivors vs control in the non-breeding strain, up-regulated	SvC-N	2.25355	2.28202
				survivors vs control in the breeding strain, down-regulated	SvC-B	2.03562	2.65291
				survivors from the breeding strain vs survivors from the non-breeding strain, down-regulated	SvS-BvN-D7	5.17255	5.23585
Tested gene	cycg003471.1	integrin alpha	F: 5'GCCCAATTCTGATGTCATGGT 3'	survivors from the breeding strain vs survivors from the non-breeding strain, up-regulated	SvS-BvN-D7	4.51331	4.29882
			R: 5'CACAATCACCCTTTGTGTCAGA 3'
Tested gene	cycg017656.1	AP-3	F: 5'GGAGAGGAATTGGGCTGCTT 3'	severely sick fish vs survivors from the non-breeding strain, down-regulated	SvI-B&N		7.60084
			R: 5'CACTTTGGGCTTCTCGTCCT 3'	survivors vs control in the non-breeding strain, up-regulated	SvC-N	6.63956	6.37136
				survivors from the breeding strain vs survivors from the non-breeding strain, down-regulated	SvS-BvN-D7	7.44394	8.15231
House-keeping gene		18S rRNA	F: 5' TCTGCCCTAACTTTCGATGGTA 3'
			R: 5' AATTTGCGCGCCTGCTGCCTTCTTT 3'
