# Supplementary material for: Integrative Transcriptomic Analysis Reveals the Immune Mechanism for a CyHV-3-Resistant Common Carp Strain
Source: Front Immunol. 2021 Jul 5;12:687151. doi: 10.3389/fimmu.2021.687151 (PMC8287582; doi:10.3389/fimmu.2021.687151)
Supplement: Supplementary file 8 [file Table_7.xlsx]

## Sheet: BS-advantage immune DEGs
#ID	FDR	log2FC	regulated	KO	immune process	immune gene category	nr_annotation	Swissprot_annotation	Pfam_annotation			NBS: non-breeding strain
cycg042328	0.047298	1.30771	UP	--	acute phase reactions	fibrinogen	PREDICTED: trinucleotide repeat-containing gene 6C protein isoform X6 [Danio rerio]	Fibrinogen alpha-1 chain (Precursor; Fragment) OS=Petromyzon marinus (Sea lamprey) PE=1 SV=2	--
cycg003426	0.00613878	2.41905	UP	--	acute phase reactions	fibrinogen	PREDICTED: fibrinogen-like protein 1 [Danio rerio]	Fibrinogen gamma chain (Precursor) GN=FGG OS=Petromyzon marinus (Sea lamprey) PE=1 SV=1	Fibrinogen beta and gamma chains, C-terminal globular domain;; Fibrinogen beta and gamma chains, C-terminal globular domain
cycg033828	0.0295132	1.08414	UP	--	acute phase reactions	MBL	mannan-binding lectin-like protein precursor [Cyprinus carpio]	Collectin-11 (Precursor) GN=COLEC11 OS=Gallus gallus (Chicken) PE=2 SV=1	Lectin C-type domain;; Collagen triple helix repeat (20 copies)
cycg006128	0.00154214	1.48664	UP	--	adapters, effectors and signal transducers	CBX4	PREDICTED: E3 SUMO-protein ligase CBX4-like [Astyanax mexicanus]	--	--
cycg017878	0.0110628	2.81319	UP	--	adapters, effectors and signal transducers	CSF	precursor of macrophage colony-stimulating factor [Carassius auratus]	--	--
cycg036547	0.015801	1.26493	UP	--	adapters, effectors and signal transducers	CSFR	PREDICTED: colony stimulating factor 2 receptor, beta, low-affinity (granulocyte-macrophage) isoform X1 [Danio rerio]	--	Fibronectin type III domain;; Interleukin-6 receptor alpha chain, binding
cycg039902	0.00216134	1.90766	UP	--	adapters, effectors and signal transducers	granzyme	granzyme [Carassius auratus langsdorfii]	Serine protease ami (Precursor) OS=Xenopus tropicalis (Western clawed frog) PE=2 SV=1	Trypsin
cycg035418	0.000796773	2.50766	UP	--	adapters, effectors and signal transducers	granzyme	granzyme [Carassius auratus langsdorfii]	Trypsin-1 (Precursor) OS=Gadus morhua (Atlantic cod) PE=1 SV=2	Trypsin
cycg011435	0.000224784	2.51769	UP	--	adapters, effectors and signal transducers	granzyme	granzyme [Carassius auratus langsdorfii]	Serine protease ami (Precursor) OS=Xenopus tropicalis (Western clawed frog) PE=2 SV=1	Trypsin;; Trypsin
cycg024777	0.0498824	1.33575	UP	K04371	adapters, effectors and signal transducers	MAPK	PREDICTED: mitogen-activated protein kinase 7 isoform X1 [Danio rerio]	Mitogen-activated protein kinase 1 GN=mapk1 OS=Xenopus laevis (African clawed frog) PE=1 SV=3	--
cycg011315	0.0120828	1.26895	UP	--	adapters, effectors and signal transducers	MAPKKK	PREDICTED: mitogen-activated protein kinase kinase kinase MLK4-like [Takifugu rubripes]	Mitogen-activated protein kinase kinase kinase 10 GN=map3k10 OS=Xenopus laevis (African clawed frog) PE=1 SV=1	Protein tyrosine kinase;; Protein kinase domain;; Protein kinase domain;; Protein tyrosine kinase
cycg018504	0.0220166	1.29336	UP	--	adapters, effectors and signal transducers	MAPKKK	PREDICTED: mitogen-activated protein kinase kinase kinase 1-like [Latimeria chalumnae]	Serine/threonine-protein kinase Nek8 GN=nek8 OS=Danio rerio (Zebrafish) PE=2 SV=1	Protein kinase domain;; Protein tyrosine kinase
cycg019308	0.0390948	1.35234	UP	--	adapters, effectors and signal transducers	MAPKKK	PREDICTED: mitogen-activated protein kinase kinase kinase 10 [Danio rerio]	Mitogen-activated protein kinase kinase kinase 10 GN=map3k10 OS=Xenopus laevis (African clawed frog) PE=1 SV=1	--
cycg011316	0.0436816	1.48133	UP	--	adapters, effectors and signal transducers	MAPKKK	PREDICTED: mitogen-activated protein kinase kinase kinase MLK4 isoform X2 [Danio rerio]	--	--
cycg017530	0.0438165	1.57779	UP	--	adapters, effectors and signal transducers	MAPKKK	PREDICTED: mitogen-activated protein kinase kinase kinase 10 [Danio rerio]	Mitogen-activated protein kinase kinase kinase 10 GN=map3k10 OS=Xenopus laevis (African clawed frog) PE=1 SV=1	--
cycg052493	1.11e-05	1.84	UP	K08838	adapters, effectors and signal transducers	MAPKKK	PREDICTED: mitogen-activated protein kinase kinase kinase kinase 4 isoform X8 [Cynoglossus semilaevis]	Serine/threonine-protein kinase 3/4 18kDa subunit GN=STK4 OS=Squalus acanthias (Spiny dogfish) PE=2 SV=1	CNH domain;; Protein kinase domain;; Protein tyrosine kinase
cycg030197	4.46e-05	1.87344	UP	--	adapters, effectors and signal transducers	MAPKKK	PREDICTED: mitogen-activated protein kinase kinase kinase MLK4 isoform X2 [Danio rerio]	Mitogen-activated protein kinase kinase kinase 10 GN=map3k10 OS=Xenopus laevis (African clawed frog) PE=1 SV=1	Protein tyrosine kinase;; Protein kinase domain;; Variant SH3 domain;; SH3 domain;; Variant SH3 domain
cycg014208	0.010451	2.17759	UP	--	adapters, effectors and signal transducers	MAPKKK	PREDICTED: mitogen-activated protein kinase kinase kinase kinase 3-like isoform X3 [Danio rerio]	Zinc finger homeobox protein 4 GN=ZFHX4 OS=Gallus gallus (Chicken) PE=2 SV=2	CNH domain;; TMEM169 protein family
cycg050885	0.000189943	1.2407	UP	K14319	adapters, effectors and signal transducers	NALP12	PREDICTED: NACHT, LRR and PYD domains-containing protein 12 [Danio rerio]	Protein NLRC5 GN=nlrc5 OS=Ictalurus punctatus (Channel catfish) PE=2 SV=1	NACHT domain;; Immunoglobulin V-set domain;; Fish-specific NACHT associated domain;; SPRY-associated domain;; Leucine Rich repeat;; SPRY domain;; Immunoglobulin I-set domain;; Leucine Rich repeats (2 copies);; Immunoglobulin domain;; Leucine Rich Repeat
cycg030260	0.040904	2.45034	UP	--	adapters, effectors and signal transducers	NALP12	PREDICTED: NACHT, LRR and PYD domains-containing protein 12-like [Danio rerio]	--	Fish-specific NACHT associated domain
cycg017109	3.16e-05	4.22495	UP	--	adapters, effectors and signal transducers	NALP12	PREDICTED: NACHT, LRR and PYD domains-containing protein 12-like isoform X3 [Danio rerio]	Stonustoxin subunit beta OS=Synanceia horrida (Estuarine stonefish) PE=1 SV=3	--
cycg045200	0.0345002	1.2171	UP	--	adapters, effectors and signal transducers	NALP3	PREDICTED: NACHT, LRR and PYD domains-containing protein 3 [Danio rerio]	Protein NLRC5 GN=nlrc5 OS=Ictalurus punctatus (Channel catfish) PE=2 SV=1	Fish-specific NACHT associated domain;; NACHT domain;; Leucine Rich repeat;; Leucine Rich repeats (2 copies);; Leucine Rich Repeat
cycg047908	0.00624096	1.27396	UP	--	adapters, effectors and signal transducers	NALP3	PREDICTED: NACHT, LRR and PYD domains-containing protein 3-like isoform X2 [Danio rerio]	Protein NLRC5 GN=nlrc5 OS=Ictalurus punctatus (Channel catfish) PE=2 SV=1	NACHT domain;; Fish-specific NACHT associated domain;; Caspase recruitment domain;; AAA ATPase domain;; AAA domain;; ATPase family associated with various cellular activities (AAA)
cycg026948	0.00748769	1.35694	UP	--	adapters, effectors and signal transducers	NALP3	PREDICTED: NACHT, LRR and PYD domains-containing protein 3 isoform X3 [Danio rerio]	Ran GTPase-activating protein 1 GN=rangap1 OS=Xenopus laevis (African clawed frog) PE=2 SV=1	--
cycg025266	0.0147689	1.36496	UP	--	adapters, effectors and signal transducers	NALP3	PREDICTED: NACHT, LRR and PYD domains-containing protein 3-like isoform X1 [Danio rerio]	Protein NLRC5 GN=nlrc5 OS=Ictalurus punctatus (Channel catfish) PE=2 SV=1	NACHT domain;; Function to find
cycg027434	0.0150539	1.69636	UP	--	adapters, effectors and signal transducers	NALP3	PREDICTED: NACHT, LRR and PYD domains-containing protein 3-like isoform X1 [Danio rerio]	Neoverrucotoxin subunit alpha OS=Synanceia verrucosa (Reef stonefish) PE=1 SV=1	Fish-specific NACHT associated domain
cycg006301	0.002796	2.11016	UP	--	adapters, effectors and signal transducers	NALP3	PREDICTED: NACHT, LRR and PYD domains-containing protein 3 [Danio rerio]	--	--
cycg048820	0.00210468	2.14256	UP	--	adapters, effectors and signal transducers	NALP3	PREDICTED: NACHT, LRR and PYD domains-containing protein 3-like [Danio rerio]	Stonustoxin subunit beta OS=Synanceia horrida (Estuarine stonefish) PE=1 SV=3	SPRY-associated domain;; Leucine Rich repeat;; SPRY domain;; Leucine Rich Repeat
cycg018446	0.0314818	1.2605	UP	--	adapters, effectors and signal transducers	NDRG1	protein NDRG1 isoform 1 [Danio rerio]	Protein NDRG1 OS=Xenopus tropicalis (Western clawed frog) PE=2 SV=1	Ndr family;; Alpha/beta hydrolase family
cycg026562	0.00188301	2.36232	UP	--	adapters, effectors and signal transducers	NLRC3	PREDICTED: protein NLRC3-like, partial [Danio rerio]	MICOS complex subunit mic25a GN=chchd6a OS=Danio rerio (Zebrafish) PE=2 SV=1	--
cycg002557	0.048765	1.0185	UP	--	adapters, effectors and signal transducers	perforin	perforin-like protein 2 [Ctenopharyngodon idella]	Complement component C8 beta chain (Precursor) GN=c8b OS=Paralichthys olivaceus (Bastard halibut) PE=2 SV=1	MAC/Perforin domain;; C2 domain
cycg014160	0.00339057	1.85358	UP	--	adapters, effectors and signal transducers	perforin	PREDICTED: perforin-1-like [Danio rerio]	Complement component C9 (Precursor) GN=c9 OS=Takifugu rubripes (Japanese pufferfish) PE=3 SV=1	MAC/Perforin domain;; C2 domain
cycg014161	1.23e-05	2.02299	UP	--	adapters, effectors and signal transducers	perforin	PREDICTED: perforin-1-like [Danio rerio]	Complement component C9 (Precursor) GN=c9 OS=Takifugu rubripes (Japanese pufferfish) PE=3 SV=1	MAC/Perforin domain;; C2 domain
cycg002555	0.018101	2.1026	UP	--	adapters, effectors and signal transducers	perforin	perforin 1 [Carassius auratus langsdorfii]	Complement component C9 (Fragment) GN=c9 OS=Oncorhynchus mykiss (Rainbow trout) PE=2 SV=2	MAC/Perforin domain;; C2 domain
cycg029343	0.000758703	2.83972	UP	--	adapters, effectors and signal transducers	perforin	perforin 3 [Carassius auratus langsdorfii]	Complement component C8 beta chain (Precursor) GN=c8b OS=Oncorhynchus mykiss (Rainbow trout) PE=2 SV=1	MAC/Perforin domain;; MAC/Perforin domain
cycg041202	0.00139428	2.84143	UP	--	adapters, effectors and signal transducers	perforin	PREDICTED: perforin-1-like [Danio rerio]	Complement component C9 (Precursor) GN=c9 OS=Takifugu rubripes (Japanese pufferfish) PE=3 SV=1	MAC/Perforin domain;; C2 domain
cycg014164	4.45e-06	2.84564	UP	--	adapters, effectors and signal transducers	perforin	PREDICTED: perforin-1-like [Danio rerio]	Complement component C9 (Precursor) GN=c9 OS=Takifugu rubripes (Japanese pufferfish) PE=3 SV=1	MAC/Perforin domain;; C2 domain
cycg036657	7.19e-05	2.93992	UP	--	adapters, effectors and signal transducers	perforin	PREDICTED: perforin-1-like [Danio rerio]	Complement component C9 (Precursor) GN=c9 OS=Takifugu rubripes (Japanese pufferfish) PE=3 SV=1	C2 domain;; MAC/Perforin domain;; MAC/Perforin domain
cycg018867	6.94e-09	3.08088	UP	--	adapters, effectors and signal transducers	perforin	perforin 2 [Carassius auratus langsdorfii]	Complement component C8 beta chain (Precursor) GN=c8b OS=Paralichthys olivaceus (Bastard halibut) PE=2 SV=1	MAC/Perforin domain;; C2 domain
cycg014162	5.28e-06	3.12847	UP	--	adapters, effectors and signal transducers	perforin	PREDICTED: perforin-1-like [Danio rerio]	Complement component C9 (Precursor) GN=c9 OS=Takifugu rubripes (Japanese pufferfish) PE=3 SV=1	MAC/Perforin domain;; C2 domain
cycg041203	1.72e-09	3.13699	UP	--	adapters, effectors and signal transducers	perforin	PREDICTED: perforin-1-like [Danio rerio]	Complement component C9 (Precursor) GN=c9 OS=Takifugu rubripes (Japanese pufferfish) PE=3 SV=1	MAC/Perforin domain;; C2 domain
cycg012028	0.0327006	1.34623	UP	--	adapters, effectors and signal transducers	Programmed cell death protein	PREDICTED: programmed cell death protein 4-like [Danio rerio]	Programmed cell death protein 4 GN=PDCD4 OS=Gallus gallus (Chicken) PE=2 SV=1	MA3 domain
cycg038873	0.0126036	1.70008	UP	K09848	adapters, effectors and signal transducers	TRAF	tnf receptor-associated factor 4b [Danio rerio]	TNF receptor-associated factor 6-B GN=traf6-b OS=Xenopus laevis (African clawed frog) PE=2 SV=1	TRAF-type zinc finger;; MATH domain;; Zinc finger, C3HC4 type (RING finger);; Zinc finger, C3HC4 type (RING finger)
cycg049476	0.0246326	1.6115	UP	--	adapters, effectors and signal transducers	TRAF	PREDICTED: TNF receptor-associated factor 2 [Danio rerio]	TNF receptor-associated factor 6 GN=traf6 OS=Danio rerio (Zebrafish) PE=2 SV=2	MATH domain;; TRAF-type zinc finger;; Zinc finger, C3HC4 type (RING finger)
cycg049472	0.00140771	1.82	UP	--	adapters, effectors and signal transducers	TRAF	PREDICTED: TNF receptor-associated factor 2-like isoform X3 [Neolamprologus brichardi]	TNF receptor-associated factor 6 GN=traf6 OS=Danio rerio (Zebrafish) PE=2 SV=2	TRAF-type zinc finger;; MATH domain
cycg038871	0.00114692	2.08066	UP	K00128	adapters, effectors and signal transducers	TRAF	tnf receptor-associated factor 4b [Danio rerio]	TNF receptor-associated factor 6-B GN=traf6-b OS=Xenopus laevis (African clawed frog) PE=2 SV=1	TRAF-type zinc finger;; MATH domain;; Aldehyde dehydrogenase family
PB.6522	0.0065216	1.43687	UP	K04721	adapters, effectors and signal transducers	TRAIL	TNF-related apoptosis inducing ligand TRAIL [Ctenopharyngodon idella]	--	TNF(Tumour Necrosis Factor) family;; TNF(Tumour Necrosis Factor) family
cycg024788	0.0122875	1.56446	UP	--	adapters, effectors and signal transducers	TRAIL	TNF-related apoptosis inducing ligand TRAIL [Ctenopharyngodon idella]	Tumor necrosis factor GN=tnf OS=Sparus aurata (Gilthead sea bream) PE=3 SV=1	TNF(Tumour Necrosis Factor) family
cycg033061	0.00396498	1.16087	UP	K06689	adapters, effectors and signal transducers	UBE	PREDICTED: ubiquitin-conjugating enzyme E2 E3-like, partial [Apaloderma vittatum]	Ubiquitin-conjugating enzyme E2 D2 GN=ube2d2 OS=Xenopus laevis (African clawed frog) PE=1 SV=1	MAM domain
cycg002566	0.0217296	1.1775	UP	K06689	adapters, effectors and signal transducers	UBE	unnamed protein product [Oncorhynchus mykiss]	Ubiquitin-conjugating enzyme E2 D2 GN=ube2d2 OS=Xenopus laevis (African clawed frog) PE=1 SV=1	Ubiquitin-conjugating enzyme
cycg010086	0.00924496	1.97084	UP	--	adapters, effectors and signal transducers	UBE	PREDICTED: protein kinase C-binding protein 1 isoform X1 [Danio rerio]	E3 ubiquitin-protein ligase TRIM33 GN=trim33 OS=Danio rerio (Zebrafish) PE=2 SV=1	Bromodomain;; Domain of unknown function (DUF3544);; PWWP domain;; PHD-finger
cycg006186	5.28e-08	2.33857	UP	K06689	adapters, effectors and signal transducers	UBE	PREDICTED: uncharacterized protein LOC105013985 [Esox lucius]	Ubiquitin-conjugating enzyme E2 D2 GN=ube2d2 OS=Xenopus laevis (African clawed frog) PE=1 SV=1	Ubiquitin-conjugating enzyme;; von Willebrand factor type A domain;; von Willebrand factor type A domain;; U-box domain;; Zinc-finger of the MIZ type in Nse subunit
cycg048695	7.39e-05	2.38442	UP	K10575	adapters, effectors and signal transducers	UBE	ubiquitin-conjugating enzyme [Danio rerio]	SUMO-conjugating enzyme UBC9-B GN=ube2ib OS=Danio rerio (Zebrafish) PE=1 SV=1	Ubiquitin-conjugating enzyme
cycg042836	0.000211226	2.20953	UP	--	antigen processing and regulators	CDK	PREDICTED: cyclin-dependent kinase-like 5 isoform X3 [Danio rerio]	--	--
cycg042835	0.000885746	2.57192	UP	K08824	antigen processing and regulators	CDK	cyclin-dependent kinase-like 5 isoform 1 [Danio rerio]	Cyclin-dependent kinase-like 1 GN=cdkl1 OS=Danio rerio (Zebrafish) PE=2 SV=1	Protein kinase domain;; Protein tyrosine kinase
cycg008583	0.00151224	3.12075	UP	K08824	antigen processing and regulators	CDK	cyclin-dependent kinase-like 5 isoform 1 [Danio rerio]	Cyclin-dependent kinase-like 1 GN=cdkl1 OS=Danio rerio (Zebrafish) PE=2 SV=1	Protein kinase domain;; Protein tyrosine kinase
cycg032957	0.0474458	1.60822	UP	--	antigen processing and regulators	CDKIs	cyclin-dependent kinase 4 inhibitor C [Danio rerio]	Protein phosphatase 1 regulatory subunit 12A GN=PPP1R12A OS=Gallus gallus (Chicken) PE=1 SV=1	Ankyrin repeats (3 copies);; Ankyrin repeats (many copies);; Ankyrin repeat;; Ankyrin repeats (many copies);; Ankyrin repeat
cycg036595	0.0185909	1.59893	UP	--	antigen processing and regulators	CIITA	PREDICTED: MHC class II transactivator isoform X3 [Danio rerio]	Protein NLRC5 GN=nlrc5 OS=Ictalurus punctatus (Channel catfish) PE=2 SV=1	Leucine Rich repeat;; Leucine Rich repeats (2 copies);; Uncharacterised conserved protein
cycg003578	0.00385881	1.5779	UP	--	antigen processing and regulators	LRMP	PREDICTED: lymphoid-restricted membrane protein isoform X4 [Danio rerio]	Lymphoid-restricted membrane protein GN=lrmp OS=Danio rerio (Zebrafish) PE=1 SV=2	MRVI1 protein;; MRVI1 protein
cycg003579	0.000584197	2.37931	UP	--	antigen processing and regulators	LRMP	PREDICTED: lymphoid-restricted membrane protein isoform X1 [Danio rerio]	Lymphoid-restricted membrane protein GN=lrmp OS=Danio rerio (Zebrafish) PE=1 SV=2	Coiled-coil region of CCDC155;; EF-hand domain;; MRVI1 protein;; MRVI1 protein
PB.2751	0.000165298	2.17419	UP	--	antigen processing and regulators	MHC I	MHC class I antigen, partial [Ctenopharyngodon idella]	Class I histocompatibility antigen, F10 alpha chain (Precursor) OS=Gallus gallus (Chicken) PE=2 SV=1	Class I Histocompatibility antigen, domains alpha 1 and 2;; Immunoglobulin C1-set domain;; CD80-like C2-set immunoglobulin domain;; Class II histocompatibility antigen, beta domain
cycg007653	0.00661876	2.26758	UP	--	antigen processing and regulators	MHC II	PREDICTED: major histocompatibility complex class II DCB isoform X1 [Danio rerio]	Class II histocompatibility antigen, B-L beta chain (Fragment) OS=Gallus gallus (Chicken) PE=3 SV=1	Immunoglobulin C1-set domain;; Class II histocompatibility antigen, beta domain;; CD80-like C2-set immunoglobulin domain
cycg015141	0.000203413	1.33107	UP	--	antigen processing and regulators	TGBR	TGF-beta receptor type-2 [Ctenopharyngodon idella]	TGF-beta receptor type-2 (Precursor) GN=TGFBR2 OS=Gallus gallus (Chicken) PE=1 SV=1	Transforming growth factor beta receptor 2 ectodomain
cycg047293	0.000876499	1.72818	UP	--	antigen processing and regulators	VEGF	vascular endothelial growth factor A-A isoform 1 precursor [Danio rerio]	Vascular endothelial growth factor A-A (Precursor) GN=vegfaa OS=Danio rerio (Zebrafish) PE=1 SV=1	VEGF heparin-binding domain
cycg001915	0.0141438	1.53503	UP	K06530	complement system	C3	PREDICTED: complement C3 [Danio rerio]	Complement C3c alpha&apos; chain fragment 2 (Fragment) GN=c3 OS=Oncorhynchus mykiss (Rainbow trout) PE=1 SV=1	A-macroglobulin complement component;; A-macroglobulin receptor;; Prenyltransferase-like;; Alpha-macro-globulin thiol-ester bond-forming region
cycg052174	0.000490063	2.68148	UP	--	complement system	C3aR	PREDICTED: chemokine-like receptor 1-like isoform X1 [Astyanax mexicanus]	C3a anaphylatoxin chemotactic receptor GN=c3ar1 OS=Danio rerio (Zebrafish) PE=3 SV=1	7 transmembrane receptor (rhodopsin family)
cycg036094	0.0401382	1.2259	UP	K06530	complement system	C5	complement component C5-2 [Cyprinus carpio]	Complement C3f fragment (Precursor) GN=C3 OS=Naja naja (Indian cobra) PE=2 SV=1	Alpha-2-macroglobulin family;; Alpha-2-macroglobulin family N-terminal region;; Anaphylotoxin-like domain
cycg028449	0.000402855	2.13777	UP	--	complement system	C8	PREDICTED: complement component C8 alpha chain isoform X1 [Danio rerio]	Complement component C8 beta chain (Precursor) GN=c8b OS=Paralichthys olivaceus (Bastard halibut) PE=2 SV=1	MAC/Perforin domain
cycg031376	0.00271286	1.12187	UP	--	inflammatory cytokines and receptors	ACRs	atypical chemokine receptor 3b [Danio rerio]	C-X-C chemokine receptor type 4-B GN=cxcr4-b OS=Xenopus laevis (African clawed frog) PE=2 SV=1	7 transmembrane receptor (rhodopsin family);; Serpentine type 7TM GPCR chemoreceptor Srsx
cycg050305	0.00024816	1.34114	UP	--	inflammatory cytokines and receptors	CCL	chemokine (C-C motif) ligand 35, duplicate 2 precursor [Danio rerio]	C-C motif chemokine 4 homolog (Precursor) GN=CCL4 OS=Gallus gallus (Chicken) PE=3 SV=4	Small cytokines (intecrine/chemokine), interleukin-8 like
cycg022979	0.00418912	1.65832	UP	--	inflammatory cytokines and receptors	CCL	chemokine (C-C motif) ligand 35, duplicate 2 precursor [Danio rerio]	C-C motif chemokine 4 homolog (Precursor) GN=CCL4 OS=Gallus gallus (Chicken) PE=3 SV=4	Small cytokines (intecrine/chemokine), interleukin-8 like
cycg027295	0.0214691	2.20417	UP	--	inflammatory cytokines and receptors	CCL	uncharacterized protein LOC100034523 precursor [Danio rerio]	C-C motif chemokine 4 homolog (Precursor) GN=CCL4 OS=Gallus gallus (Chicken) PE=3 SV=4	Small cytokines (intecrine/chemokine), interleukin-8 like
PB.1846	2.69e-05	2.67021	UP	--	inflammatory cytokines and receptors	CCL	chemokine CCL-C25a [Danio rerio]	C-C motif chemokine 4 homolog (Precursor) GN=CCL4 OS=Gallus gallus (Chicken) PE=3 SV=4	Small cytokines (intecrine/chemokine), interleukin-8 like
cycg001961	0.0246579	1.09121	UP	--	inflammatory cytokines and receptors	CCR	C-C chemokine receptor family-like [Danio rerio]	C-X-C chemokine receptor type 4-B GN=cxcr4-b OS=Xenopus laevis (African clawed frog) PE=2 SV=1	7 transmembrane receptor (rhodopsin family)
cycg010850	0.00975701	1.45375	UP	--	inflammatory cytokines and receptors	CCR	PREDICTED: C-C chemokine receptor type 5-like [Danio rerio]	C-X-C chemokine receptor type 4-A GN=cxcr4-a OS=Xenopus laevis (African clawed frog) PE=2 SV=1	7 transmembrane receptor (rhodopsin family)
cycg005238	0.0170026	1.57765	UP	--	inflammatory cytokines and receptors	CCR	PREDICTED: C-C chemokine receptor type 5-like [Danio rerio]	C-X-C chemokine receptor type 4 {ECO:0000250|UniProtKB:P61073, ECO:0000312|EMBL:CAL49334.1} OS=Xenopus tropicalis (Western clawed frog) PE=2 SV=1	7 transmembrane receptor (rhodopsin family);; Serpentine type 7TM GPCR chemoreceptor Srsx
cycg005239	0.0287433	1.77964	UP	--	inflammatory cytokines and receptors	CCR	PREDICTED: C-C chemokine receptor type 5-like [Danio rerio]	C-X-C chemokine receptor type 4-B GN=cxcr4-b OS=Xenopus laevis (African clawed frog) PE=2 SV=1	7 transmembrane receptor (rhodopsin family);; Serpentine type 7TM GPCR chemoreceptor Srsx
cycg012698	0.00207094	1.90063	UP	--	inflammatory cytokines and receptors	CCR	C-C chemokine receptor type 7 precursor [Danio rerio]	C-X-C chemokine receptor type 4-B GN=cxcr4-b OS=Xenopus laevis (African clawed frog) PE=2 SV=1	Pectinacetylesterase;; 7 transmembrane receptor (rhodopsin family)
cycg034854	9.2e-05	2.1426	UP	--	inflammatory cytokines and receptors	CCR	PREDICTED: C-C chemokine receptor type 5-like [Danio rerio]	C-X-C chemokine receptor type 4 {ECO:0000250|UniProtKB:P61073, ECO:0000312|EMBL:CAL49334.1} OS=Xenopus tropicalis (Western clawed frog) PE=2 SV=1	7 transmembrane receptor (rhodopsin family);; Serpentine type 7TM GPCR chemoreceptor Srsx
PB.4871	0.0139839	1.82754	UP	K04193	inflammatory cytokines and receptors	CXCR	Xcr1a protein [Danio rerio]	C-X-C chemokine receptor type 4-B GN=cxcr4-b OS=Xenopus laevis (African clawed frog) PE=2 SV=1	7 transmembrane receptor (rhodopsin family);; Serpentine type 7TM GPCR chemoreceptor Srsx
cycg031157	0.039477	1.04302	UP	--	inflammatory cytokines and receptors	EGF	epidermal growth factor-like protein 7 precursor [Danio rerio]	Epidermal growth factor-like protein 6 (Precursor) GN=egfl6 OS=Xenopus laevis (African clawed frog) PE=2 SV=1	EMI domain;; Calcium-binding EGF domain;; EGF-like domain
cycg021446	1.71e-05	2.48785	UP	--	inflammatory cytokines and receptors	EGF	PREDICTED: epidermal growth factor-like protein 6 isoform X1 [Astyanax mexicanus]	Epidermal growth factor-like protein 6 (Precursor) GN=egfl6 OS=Xenopus laevis (African clawed frog) PE=2 SV=1	Calcium-binding EGF domain;; Complement Clr-like EGF-like;; EGF-like domain;; Coagulation Factor Xa inhibitory site;; EGF domain
cycg010773	0.00232557	1.32686	UP	--	inflammatory cytokines and receptors	FGFR	PREDICTED: fibroblast growth factor receptor homolog 1-like [Danio rerio]	Fibroblast growth factor receptor 1 (Precursor) GN=FGFR1 OS=Gallus gallus (Chicken) PE=2 SV=1	Protein tyrosine kinase;; Protein kinase domain;; Protein tyrosine kinase
cycg030338	0.0116572	1.53214	UP	--	inflammatory cytokines and receptors	FGFR	FGFR2c [Danio rerio]	Fibroblast growth factor receptor 2 (Precursor) GN=fgfr2 OS=Danio rerio (Zebrafish) PE=1 SV=1	Immunoglobulin I-set domain;; Immunoglobulin domain;; Protein tyrosine kinase;; Immunoglobulin domain;; Immunoglobulin domain;; Immunoglobulin V-set domain;; Protein kinase domain
cycg009301	0.000253822	1.60047	UP	--	inflammatory cytokines and receptors	FGFR	fibroblast growth factor receptor 1a2 [Cyprinus carpio]	Fibroblast growth factor receptor 1-A (Precursor) GN=fgfr1a OS=Danio rerio (Zebrafish) PE=1 SV=2	Protein tyrosine kinase;; Immunoglobulin I-set domain;; Immunoglobulin domain;; Protein kinase domain;; Immunoglobulin domain;; Immunoglobulin domain;; Immunoglobulin V-set domain;; CD80-like C2-set immunoglobulin domain;; Protein tyrosine kinase;; Protein kinase domain
cycg011545	0.0100837	1.64835	UP	--	inflammatory cytokines and receptors	FGFR	PREDICTED: fibroblast growth factor receptor 2 isoform X1 [Danio rerio]	Fibroblast growth factor receptor 2 (Precursor) GN=fgfr2 OS=Danio rerio (Zebrafish) PE=1 SV=1	Immunoglobulin I-set domain;; Immunoglobulin domain;; Immunoglobulin domain;; Immunoglobulin domain;; Immunoglobulin V-set domain;; Alphaherpesvirus glycoprotein E;; Protein tyrosine kinase;; Protein kinase domain
cycg023092	7.08e-05	1.67347	UP	--	inflammatory cytokines and receptors	FGFR	fibroblast growth factor receptor-like 1 precursor [Danio rerio]	Fibroblast growth factor receptor-like 1 (Precursor) GN=FGFRL1 OS=Gallus gallus (Chicken) PE=1 SV=1	Immunoglobulin I-set domain;; Immunoglobulin domain;; Immunoglobulin domain;; Immunoglobulin domain;; Immunoglobulin V-set domain
cycg047122	0.000426544	1.68275	UP	--	inflammatory cytokines and receptors	FGFR	fibroblast growth factor receptor 1b [Danio rerio]	Fibroblast growth factor receptor 1-A (Precursor) GN=fgfr1a OS=Danio rerio (Zebrafish) PE=1 SV=2	Immunoglobulin I-set domain;; Immunoglobulin domain;; Immunoglobulin domain;; Immunoglobulin domain;; Immunoglobulin V-set domain;; CD80-like C2-set immunoglobulin domain;; Protein tyrosine kinase;; Protein kinase domain;; Protein tyrosine kinase;; Immunoglobulin I-set domain
cycg013455	0.00312108	1.71762	UP	--	inflammatory cytokines and receptors	FGFR	PREDICTED: fibroblast growth factor receptor homolog 1-like [Danio rerio]	Fibroblast growth factor receptor 2 (Precursor) GN=FGFR2 OS=Pleurodeles waltl (Iberian ribbed newt) PE=2 SV=1	Protein tyrosine kinase;; Protein kinase domain
cycg032692	0.0145409	1.73437	UP	--	inflammatory cytokines and receptors	FGFR	fibroblast growth factor receptor 1 isoform 4 [Danio rerio]	Fibroblast growth factor receptor 1-A (Precursor) GN=fgfr1a OS=Danio rerio (Zebrafish) PE=1 SV=2	Protein tyrosine kinase;; Protein kinase domain
cycg010100	0.00652635	2.19272	UP	--	inflammatory cytokines and receptors	FGFR	PREDICTED: fibroblast growth factor receptor 3 isoform X5 [Astyanax mexicanus]	Fibroblast growth factor receptor 3 (Precursor) GN=fgfr3 OS=Danio rerio (Zebrafish) PE=2 SV=1	--
cycg016226	3.19e-05	2.31802	UP	--	inflammatory cytokines and receptors	FGFR	PREDICTED: fibroblast growth factor receptor 1-A-like isoform 2 [Takifugu rubripes]	Fibroblast growth factor receptor 1-A (Precursor) GN=fgfr1a OS=Danio rerio (Zebrafish) PE=1 SV=2	Protein tyrosine kinase;; Protein kinase domain;; Immunoglobulin I-set domain;; Immunoglobulin domain;; Immunoglobulin domain;; Immunoglobulin domain;; CD80-like C2-set immunoglobulin domain;; Immunoglobulin I-set domain;; Immunoglobulin domain;; Immunoglobulin domain;; Immunoglobulin V-set domain;; Immunoglobulin I-set domain;; Immunoglobulin domain
cycg004974	0.0182254	1.69357	UP	--	inflammatory cytokines and receptors	GVIN	PREDICTED: interferon-induced very large GTPase 1-like [Danio rerio]	--	Dynamin family
cycg023016	0.00022557	1.77581	UP	--	inflammatory cytokines and receptors	GVIN	PREDICTED: interferon-induced very large GTPase 1-like [Danio rerio]	--	Root hair defective 3 GTP-binding protein (RHD3)
cycg048336	0.0491034	1.96381	UP	--	inflammatory cytokines and receptors	GVIN	PREDICTED: interferon-induced very large GTPase 1-like [Danio rerio]	--	--
cycg023015	0.00355974	2.11458	UP	--	inflammatory cytokines and receptors	GVIN	PREDICTED: interferon-induced very large GTPase 1-like [Danio rerio]	--	--
cycg002616	0.00194229	2.16949	UP	--	inflammatory cytokines and receptors	GVIN	PREDICTED: interferon-induced very large GTPase 1-like [Danio rerio]	Stonustoxin subunit beta OS=Synanceia horrida (Estuarine stonefish) PE=1 SV=3	Dynamin family;; 50S ribosome-binding GTPase;; Root hair defective 3 GTP-binding protein (RHD3)
cycg052009	0.000101683	2.38829	UP	--	inflammatory cytokines and receptors	GVIN	PREDICTED: interferon-induced very large GTPase 1-like [Danio rerio]	E3 ubiquitin-protein ligase TRIM33 GN=trim33 OS=Danio rerio (Zebrafish) PE=2 SV=1	SAND domain;; PHD-finger
cycg021785	0.0146971	2.41956	UP	--	inflammatory cytokines and receptors	GVIN	PREDICTED: interferon-induced very large GTPase 1-like [Danio rerio]	--	--
cycg002041	0.042192	2.43901	UP	--	inflammatory cytokines and receptors	GVIN	PREDICTED: interferon-induced very large GTPase 1-like [Danio rerio]	--	--
cycg002617	4.47e-06	2.5228	UP	--	inflammatory cytokines and receptors	GVIN	PREDICTED: interferon-induced very large GTPase 1-like [Danio rerio]	--	--
cycg047567	0.000289062	2.66593	UP	--	inflammatory cytokines and receptors	GVIN	PREDICTED: interferon-induced very large GTPase 1-like [Danio rerio]	--	Dynamin family
cycg004976	1.05e-06	3.25014	UP	--	inflammatory cytokines and receptors	GVIN	PREDICTED: interferon-induced very large GTPase 1-like [Danio rerio]	--	--
cycg052008	2.16e-11	3.79084	UP	--	inflammatory cytokines and receptors	GVIN	PREDICTED: interferon-induced very large GTPase 1-like [Danio rerio]	--	--
cycg033607	2.83e-06	3.96595	UP	--	inflammatory cytokines and receptors	GVIN	PREDICTED: interferon-induced very large GTPase 1-like [Danio rerio]	--	--
cycg000013	0.0192129	1.16541	UP	--	inflammatory cytokines and receptors	IFI	PREDICTED: interferon-induced protein 44 [Danio rerio]	--	50S ribosome-binding GTPase
cycg027252	0.0014005	1.31459	UP	--	inflammatory cytokines and receptors	IFI	PREDICTED: interferon-induced protein 44-like isoform X1 [Danio rerio]	--	TLD;; Septin;; 50S ribosome-binding GTPase;; Conserved hypothetical ATP binding protein
cycg027267	0.0447683	2.41176	UP	--	inflammatory cytokines and receptors	IFI	PREDICTED: interferon-induced protein 44-like isoform X1 [Danio rerio]	--	TLD;; 50S ribosome-binding GTPase;; Septin
cycg027270	0.000929676	2.50346	UP	--	inflammatory cytokines and receptors	IFI	PREDICTED: interferon-induced protein 44-like isoform X1 [Danio rerio]	--	TLD;; 50S ribosome-binding GTPase;; Septin
cycg021640	0.00551722	3.06459	UP	--	inflammatory cytokines and receptors	IFI	PREDICTED: interferon-induced protein 44-like isoform X1 [Danio rerio]	Serine/arginine-rich splicing factor 2 GN=SRSF2 OS=Gallus gallus (Chicken) PE=2 SV=1	TLD;; 50S ribosome-binding GTPase
cycg044693	0.00676964	3.07301	UP	--	inflammatory cytokines and receptors	IFI	PREDICTED: interferon-induced protein 44-like [Danio rerio]	--	--
cycg010821	3.3e-06	2.72181	UP	--	inflammatory cytokines and receptors	IFIT	interferon-induced protein with tetratricopeptide repeats [Danio rerio]	--	TPR repeat;; Tetratricopeptide repeat;; Tetratricopeptide repeat;; Tetratricopeptide repeat;; Tetratricopeptide repeat;; Tetratricopeptide repeat;; Tetratricopeptide repeat
cycg010822	1.68e-06	3.27393	UP	--	inflammatory cytokines and receptors	IFIT	PREDICTED: interferon-induced protein with tetratricopeptide repeats 5-like isoform X1 [Danio rerio]	--	TPR repeat;; Tetratricopeptide repeat;; Tetratricopeptide repeat;; Tetratricopeptide repeat;; Tetratricopeptide repeat;; Tetratricopeptide repeat;; Tetratricopeptide repeat;; Tetratricopeptide repeat;; Tetratricopeptide repeat
cycg028947	0.0038219	1.45263	UP	--	inflammatory cytokines and receptors	IL10R	interleukin-10 receptor 1 [Carassius auratus]	--	--
cycg050721	0.0464869	1.09301	UP	--	inflammatory cytokines and receptors	IL13R	interleukin-13 receptor subunit alpha-2 precursor [Danio rerio]	Prolactin receptor (Precursor) GN=PRLR OS=Columba livia (Domestic pigeon) PE=2 SV=1	Interleukin-6 receptor alpha chain, binding;; Calponin homology (CH) domain
cycg003141	0.00169707	1.08944	UP	--	inflammatory cytokines and receptors	IL17R	interleukin-17 receptor A precursor [Danio rerio]	Interleukin-17 receptor D (Precursor) GN=il17rd OS=Danio rerio (Zebrafish) PE=1 SV=2	SEFIR domain
cycg024066	5.05e-05	1.71505	UP	--	inflammatory cytokines and receptors	IL17R	interleukin-17 receptor D precursor [Danio rerio]	Interleukin-17 receptor D (Precursor) GN=il17rd OS=Danio rerio (Zebrafish) PE=1 SV=2	SEFIR domain;; Cystatin domain
cycg021970	0.00649291	2.46916	UP	--	inflammatory cytokines and receptors	IL17R	PREDICTED: interleukin-17 receptor D isoform X1 [Danio rerio]	Interleukin-17 receptor D (Precursor) GN=IL17RD OS=Gallus gallus (Chicken) PE=2 SV=1	Fibronectin type III domain;; SEFIR domain
cycg029830	0.00763327	1.14898	UP	--	inflammatory cytokines and receptors	IL1R related	single Ig IL-1-related receptor precursor [Danio rerio]	Interleukin-1 receptor accessory protein-like 1-A (Precursor) GN=il1rapl1a OS=Danio rerio (Zebrafish) PE=2 SV=1	TIR domain;; TIR domain;; Immunoglobulin V-set domain
cycg030571	0.00552353	2.2158	UP	--	inflammatory cytokines and receptors	IL1R related	interleukin-1 receptor-associated kinase 1-binding protein 1 homolog [Danio rerio]	Interleukin-1 receptor-associated kinase 1-binding protein 1 homolog GN=irak1bp1 OS=Danio rerio (Zebrafish) PE=2 SV=1	Protein of unknown function (DUF541)
cycg028131	3e-05	3.31239	UP	--	inflammatory cytokines and receptors	IL1R related	PREDICTED: interleukin-1 receptor accessory protein-like 1-A isoform X1 [Danio rerio]	Interleukin-1 receptor accessory protein-like 1-A (Precursor) GN=il1rapl1a OS=Danio rerio (Zebrafish) PE=2 SV=1	TIR domain;; TIR domain
cycg001862	0.000464954	2.03556	UP	--	inflammatory cytokines and receptors	IL21R	PREDICTED: interleukin 21 receptor, tandem duplicate 2 isoform X1 [Danio rerio]	Erythropoietin receptor (Precursor) OS=Xenopus laevis (African clawed frog) PE=2 SV=1	--
cycg001858	0.00243308	3.32538	UP	--	inflammatory cytokines and receptors	IL21R	PREDICTED: interleukin 21 receptor, tandem duplicate 2 isoform X1 [Danio rerio]	--	--
cycg001857	0.0377706	1.28092	UP	--	inflammatory cytokines and receptors	IL21R	PREDICTED: interleukin-21 receptor isoform X1 [Danio rerio]	--	--
cycg029739	0.0319734	1.84463	UP	--	inflammatory cytokines and receptors	IL23R	PREDICTED: interleukin 23 receptor isoform X2 [Danio rerio]	--	--
cycg006622	6.05e-08	2.71366	UP	--	inflammatory cytokines and receptors	IL23R	PREDICTED: interleukin 23 receptor isoform X2 [Danio rerio]	--	--
cycg009840	0.00029777	1.29059	UP	--	inflammatory cytokines and receptors	IL2R	interleukin 2 receptor, gamma a precursor [Danio rerio]	--	--
cycg044786	4.93e-05	2.01493	UP	--	inflammatory cytokines and receptors	IL2R	PREDICTED: interleukin-2 receptor subunit beta isoform X1 [Danio rerio]	--	--
cycg018889	0.0152968	1.44829	UP	--	inflammatory cytokines and receptors	IL6R	PREDICTED: interleukin-6 receptor subunit beta-like isoform X2 [Danio rerio]	--	--
cycg040205	4.15e-08	2.9436	UP	--	inflammatory cytokines and receptors	IL6R	PREDICTED: interleukin-6 receptor subunit beta-like isoform X1 [Danio rerio]	Neural cell adhesion molecule L1 (Precursor) GN=l1cam OS=Takifugu rubripes (Japanese pufferfish) PE=3 SV=1	Fibronectin type III domain
cycg049488	0.0389424	1.37693	UP	--	inflammatory cytokines and receptors	IL-8	interleukin 8 [Cyprinus carpio]	Interleukin-8 (Precursor) GN=CXCL8 OS=Gallus gallus (Chicken) PE=2 SV=1	Small cytokines (intecrine/chemokine), interleukin-8 like
cycg020672	0.00201613	3.08441	UP	--	inflammatory cytokines and receptors	IL-8	uncharacterized protein LOC100003859 precursor [Danio rerio]	Interleukin-8 (Precursor) GN=CXCL8 OS=Gallus gallus (Chicken) PE=2 SV=1	Small cytokines (intecrine/chemokine), interleukin-8 like
cycg007282	4.08e-05	1.38347	UP	--	inflammatory cytokines and receptors	integrin alpha	PREDICTED: integrin alpha-1 isoform X2 [Danio rerio]	Integrin alpha-1 (Fragment) GN=ITGA1 OS=Gallus gallus (Chicken) PE=2 SV=1	von Willebrand factor type A domain;; Integrin alpha;; FG-GAP repeat;; von Willebrand factor type A domain;; Repeat domain in Vibrio, Colwellia, Bradyrhizobium and Shewanella;; Integrin alpha
cycg029507	0.00361859	1.54493	UP	--	inflammatory cytokines and receptors	integrin alpha	PREDICTED: integrin alpha-3 isoform X1 [Danio rerio]	Integrin alpha-6 light chain (Precursor) GN=ITGA6 OS=Gallus gallus (Chicken) PE=2 SV=1	Integrin alpha;; FG-GAP repeat;; Repeat domain in Vibrio, Colwellia, Bradyrhizobium and Shewanella;; FG-GAP repeat
cycg000937	0.000208069	1.57124	UP	--	inflammatory cytokines and receptors	integrin alpha	PREDICTED: integrin, alpha 6b isoform X1 [Danio rerio]	Integrin alpha-6 light chain (Precursor) GN=ITGA6 OS=Gallus gallus (Chicken) PE=2 SV=1	Integrin alpha;; FG-GAP repeat;; Repeat domain in Vibrio, Colwellia, Bradyrhizobium and Shewanella;; FG-GAP repeat
cycg026445	0.0117389	1.58059	UP	K13412	inflammatory cytokines and receptors	integrin alpha	PREDICTED: integrin alpha-3 [Danio rerio]	Integrin alpha-6 light chain (Precursor) GN=ITGA6 OS=Gallus gallus (Chicken) PE=2 SV=1	Eukaryotic-type carbonic anhydrase;; EF hand;; EF hand;; EF-hand domain pair;; EF-hand domain;; Integrin alpha;; EF-hand domain pair;; Integrin alpha;; FG-GAP repeat;; Repeat domain in Vibrio, Colwellia, Bradyrhizobium and Shewanella
cycg040342	0.0049049	1.67907	UP	--	inflammatory cytokines and receptors	integrin alpha	PREDICTED: integrin alpha-M-like [Danio rerio]	Integrin alpha-5 light chain (Precursor) GN=itga5 OS=Xenopus laevis (African clawed frog) PE=2 SV=1	Integrin alpha;; von Willebrand factor type A domain;; FG-GAP repeat;; Repeat domain in Vibrio, Colwellia, Bradyrhizobium and Shewanella
cycg027705	0.037664	1.73353	UP	--	inflammatory cytokines and receptors	integrin alpha	PREDICTED: integrin alpha-4-like [Danio rerio]	Integrin alpha-4 (Precursor) GN=itga4 OS=Xenopus laevis (African clawed frog) PE=2 SV=1	--
cycg010790	0.0406976	1.74139	UP	--	inflammatory cytokines and receptors	integrin alpha	PREDICTED: integrin alpha-3 isoform X1 [Danio rerio]	Integrin alpha-6 light chain (Precursor) GN=ITGA6 OS=Gallus gallus (Chicken) PE=2 SV=1	Integrin alpha;; FG-GAP repeat
cycg025787	0.0152968	2.2722	UP	--	inflammatory cytokines and receptors	integrin alpha	Itga6 protein [Danio rerio]	Integrin alpha-6 light chain (Precursor) GN=ITGA6 OS=Gallus gallus (Chicken) PE=2 SV=1	--
cycg037815	0.0231315	2.50804	UP	--	inflammatory cytokines and receptors	integrin alpha	integrin alpha-8 [Danio rerio]	Integrin alpha-8 light chain (Precursor) GN=ITGA8 OS=Gallus gallus (Chicken) PE=1 SV=1	Integrin alpha;; Integrin alpha cytoplasmic region
cycg028283	2.64e-15	2.71203	UP	--	inflammatory cytokines and receptors	integrin alpha	PREDICTED: integrin alpha-6 isoform X1 [Danio rerio]	Integrin alpha-6 light chain (Precursor) GN=ITGA6 OS=Gallus gallus (Chicken) PE=2 SV=1	Integrin alpha;; FG-GAP repeat;; Repeat domain in Vibrio, Colwellia, Bradyrhizobium and Shewanella
cycg011952	0.00172624	2.82078	UP	--	inflammatory cytokines and receptors	integrin alpha	integrin alpha-8 [Danio rerio]	Integrin alpha-8 light chain (Precursor) GN=ITGA8 OS=Gallus gallus (Chicken) PE=1 SV=1	Integrin alpha
cycg005249	1.18e-09	3.30661	UP	--	inflammatory cytokines and receptors	integrin alpha	PREDICTED: integrin alpha-6 isoform X1 [Danio rerio]	Integrin alpha-6 light chain (Precursor) GN=ITGA6 OS=Gallus gallus (Chicken) PE=2 SV=1	Integrin alpha;; FG-GAP repeat
cycg003472	0.000336231	3.76137	UP	--	inflammatory cytokines and receptors	integrin alpha	integrin alpha 8, partial [Danio rerio]	Integrin alpha-8 light chain (Precursor) GN=ITGA8 OS=Gallus gallus (Chicken) PE=1 SV=1	Integrin alpha
cycg003471	1.32e-05	4.29882	UP	--	inflammatory cytokines and receptors	integrin alpha	integrin alpha 8, partial [Danio rerio]	Integrin alpha-8 light chain (Precursor) GN=ITGA8 OS=Gallus gallus (Chicken) PE=1 SV=1	FG-GAP repeat;; Repeat domain in Vibrio, Colwellia, Bradyrhizobium and Shewanella
cycg025721	0.00566402	1.74069	UP	--	inflammatory cytokines and receptors	integrin beta	PREDICTED: integrin beta-6 [Danio rerio]	Integrin beta-1-A (Precursor) GN=itgb1-a OS=Xenopus laevis (African clawed frog) PE=2 SV=1	Integrin, beta chain;; Integrin beta cytoplasmic domain;; Integrin beta tail domain;; EGF-like domain
cycg050095	0.00717261	3.04066	UP	--	inflammatory cytokines and receptors	integrin beta	integrin beta-like protein 1 precursor [Danio rerio]	Integrin beta-like protein 1 (Precursor) GN=itgbl1 OS=Xenopus laevis (African clawed frog) PE=2 SV=1	EGF-like domain
cycg005354	0.00100014	1.46564	UP	--	inflammatory cytokines and receptors	IRF4	PREDICTED: interferon regulatory factor 4 [Danio rerio]	Interferon regulatory factor 8 GN=IRF8 OS=Gallus gallus (Chicken) PE=2 SV=1	Interferon-regulatory factor 3;; Interferon regulatory factor transcription factor
cycg001527	0.00992574	1.50117	UP	--	inflammatory cytokines and receptors	IRF4	interferon regulatory factor 4 [Danio rerio]	Interferon regulatory factor 8 GN=IRF8 OS=Gallus gallus (Chicken) PE=2 SV=1	Interferon-regulatory factor 3;; Interferon regulatory factor transcription factor
cycg019969	0.00557479	1.70515	UP	--	inflammatory cytokines and receptors	IRF4	PREDICTED: interferon regulatory factor 4 [Danio rerio]	Interferon regulatory factor 8 GN=IRF8 OS=Gallus gallus (Chicken) PE=2 SV=1	Interferon-regulatory factor 3;; Interferon regulatory factor transcription factor
cycg044086	0.00145607	1.72421	UP	--	inflammatory cytokines and receptors	IRF4	interferon regulatory factor 4 [Danio rerio]	Interferon regulatory factor 8 GN=IRF8 OS=Gallus gallus (Chicken) PE=2 SV=1	Interferon-regulatory factor 3;; Interferon regulatory factor transcription factor
cycg027805	0.021437	1.16157	UP	--	inflammatory cytokines and receptors	IRF5	interferon regulatory factor 5 [Ctenopharyngodon idella]	C-X-C chemokine receptor type 4-B GN=cxcr4-b OS=Xenopus laevis (African clawed frog) PE=2 SV=1	7 transmembrane receptor (rhodopsin family);; 7 transmembrane receptor (rhodopsin family)
cycg037550	0.00306839	1.43792	UP	--	inflammatory cytokines and receptors	IRF7	interferon regulatory factor 7 [Cyprinus carpio]	Interferon regulatory factor 3 GN=IRF3 OS=Gallus gallus (Chicken) PE=2 SV=1	Interferon-regulatory factor 3;; Interferon regulatory factor transcription factor
cycg026370	0.0048914	1.83575	UP	--	inflammatory cytokines and receptors	MX	PREDICTED: interferon-induced GTP-binding protein Mx isoform X2 [Danio rerio]	Interferon-induced GTP-binding protein Mx GN=mx OS=Siniperca chuatsi (Mandarin fish) PE=2 SV=1	Dynamin central region;; Dynamin GTPase effector domain
cycg021134	0.00479699	2.6575	UP	--	inflammatory cytokines and receptors	NFIL3	PREDICTED: nuclear factor, interleukin 3 regulated, member 4 isoform X1 [Danio rerio]	Nuclear factor interleukin-3-regulated protein GN=nfil3 OS=Danio rerio (Zebrafish) PE=2 SV=1	Basic region leucine zipper;; bZIP transcription factor
cycg021154	1.3e-07	2.92908	UP	--	inflammatory cytokines and receptors	NFIL3	PREDICTED: nuclear factor interleukin-3-regulated protein [Danio rerio]	Nuclear factor interleukin-3-regulated protein GN=NFIL3 OS=Gallus gallus (Chicken) PE=1 SV=1	Basic region leucine zipper;; bZIP transcription factor
cycg032755	0.00856955	2.4505	UP	--	inflammatory cytokines and receptors	TITIN	PREDICTED: titin-like isoform X1 [Astyanax mexicanus]	Myosin-11 GN=MYH11 OS=Gallus gallus (Chicken) PE=1 SV=4	--
cycg037811	0.019866	1.97377	UP	--	inflammatory cytokines and receptors	XCR	PREDICTED: chemokine XC receptor 1-like [Danio rerio]	C5a anaphylatoxin chemotactic receptor 1 GN=c5ar1 OS=Danio rerio (Zebrafish) PE=3 SV=1	7 transmembrane receptor (rhodopsin family);; Serpentine type 7TM GPCR chemoreceptor Srsx
cycg019088	0.0323087	2.39804	UP	--	innate immune cells related	MCP	PREDICTED: monocyte chemotactic protein 1B-like [Danio rerio]	C-C motif chemokine 4 homolog (Precursor) GN=CCL4 OS=Gallus gallus (Chicken) PE=3 SV=4	Small cytokines (intecrine/chemokine), interleukin-8 like
cycg026643	0.0120518	1.80745	UP	--	innate immune cells related	MMR	PREDICTED: macrophage mannose receptor 1 [Danio rerio]	72 kDa type IV collagenase (Precursor) GN=MMP2 OS=Gallus gallus (Chicken) PE=1 SV=1	Fibronectin type II domain;; Ricin-type beta-trefoil lectin domain
cycg022010	0.0275888	1.44216	UP	--	innate immune cells related	NCAM	PREDICTED: neural cell adhesion molecule L1.2 isoform X1 [Danio rerio]	Neural cell adhesion molecule L1 (Precursor) GN=l1cam OS=Takifugu rubripes (Japanese pufferfish) PE=3 SV=1	Immunoglobulin I-set domain;; Immunoglobulin domain;; Immunoglobulin domain;; Fibronectin type III domain;; Immunoglobulin domain;; Immunoglobulin V-set domain;; CD80-like C2-set immunoglobulin domain;; Alphaherpesvirus glycoprotein E;; Immunoglobulin C1-set domain;; Natural killer cell receptor 2B4
cycg024853	1.3e-05	3.27155	UP	--	innate immune cells related	NCAM	PREDICTED: neural cell adhesion molecule 1-like [Astyanax mexicanus]	Neural cell adhesion molecule 1 (Precursor) GN=NCAM1 OS=Gallus gallus (Chicken) PE=1 SV=3	Immunoglobulin I-set domain;; Immunoglobulin domain;; Immunoglobulin domain;; Fibronectin type III domain;; Immunoglobulin V-set domain;; Immunoglobulin domain;; Alphaherpesvirus glycoprotein E
cycg024375	8.88e-07	4.75843	UP	--	innate immune cells related	NCAM	LOC557548 protein [Danio rerio]	Neural cell adhesion molecule 1 (Precursor) GN=NCAM1 OS=Gallus gallus (Chicken) PE=1 SV=3	Immunoglobulin domain;; Immunoglobulin domain;; Immunoglobulin domain
cycg050366	1.39e-07	4.93642	UP	--	innate immune cells related	NCAM	PREDICTED: neural cell adhesion molecule L1.2 isoform X1 [Danio rerio]	Neural cell adhesion molecule L1 (Precursor) GN=l1cam OS=Takifugu rubripes (Japanese pufferfish) PE=3 SV=1	Immunoglobulin I-set domain;; Fibronectin type III domain;; Immunoglobulin domain;; Immunoglobulin domain;; Immunoglobulin domain;; Immunoglobulin V-set domain;; CD80-like C2-set immunoglobulin domain;; Alphaherpesvirus glycoprotein E;; Immunoglobulin C1-set domain;; Natural killer cell receptor 2B4;; Bravo-like intracellular region
cycg018455	0.0419359	1.03153	UP	--	other genes related to immune response	ACTININ	PREDICTED: microtubule-actin cross-linking factor 1 isoform X19 [Danio rerio]	Alpha-actinin-4 GN=ACTN4 OS=Gallus gallus (Chicken) PE=1 SV=1	Spectrin repeat;; Calponin homology (CH) domain;; CAMSAP CH domain;; Spectrin repeat
cycg033466	0.00192475	1.00431	UP	K08245	other genes related to immune response	cathepsin	Zgc:63831 [Danio rerio]	Cathepsin D (Precursor) GN=ctsd OS=Chionodraco hamatus (Antarctic teleost icefish) PE=1 SV=2	Eukaryotic aspartyl protease;; Xylanase inhibitor N-terminal;; A1 Propeptide;; Xylanase inhibitor C-terminal
cycg031047	0.00252025	1.06708	UP	K08568	other genes related to immune response	cathepsin	PREDICTED: cathepsin Z-like isoform X1 [Danio rerio]	Cathepsin B heavy chain (Precursor) GN=CTSB OS=Gallus gallus (Chicken) PE=2 SV=1	Papain family cysteine protease
cycg025113	2.46e-05	1.81095	UP	K01373	other genes related to immune response	cathepsin	PREDICTED: cathepsin O [Danio rerio]	Cathepsin L1 light chain (Fragments) GN=CTSL OS=Gallus gallus (Chicken) PE=1 SV=1	Papain family cysteine protease
cycg033891	3.69e-07	2.11412	UP	--	other genes related to immune response	cathepsin	cathepsin Sa [Danio rerio]	Cathepsin K (Precursor) GN=CTSK OS=Gallus gallus (Chicken) PE=2 SV=1	Papain family cysteine protease
cycg043523	0.0141026	1.20552	UP	--	other genes related to immune response	CD302	PREDICTED: CD302 antigen-like [Danio rerio]	C-type lectin BiL (Precursor) OS=Bothrops insularis (Golden lancehead) PE=1 SV=1	Lectin C-type domain
cycg004850	0.00610896	2.67393	UP	--	other genes related to immune response	HSPb1	PREDICTED: heat shock protein beta-1-like [Danio rerio]	Hypoxia up-regulated protein 1 (Precursor) GN=hyou1 OS=Danio rerio (Zebrafish) PE=2 SV=1	--
cycg016007	6.91e-07	4.13332	UP	--	other genes related to immune response	lymphocyte antigen	PREDICTED: T-lymphocyte surface antigen Ly-9-like [Danio rerio]	--	--
cycg029580	0.0225648	1.23682	UP	--	other genes related to immune response	lymphocyte related	PREDICTED: lymphocyte cytosolic protein 2 isoform X2 [Danio rerio]	B-cell linker protein GN=BLNK OS=Gallus gallus (Chicken) PE=1 SV=1	SH2 domain
cycg012839	0.00239829	1.61803	UP	--	other genes related to immune response	lymphocyte related	PREDICTED: lymphocyte cytosolic protein 2 isoform X2 [Danio rerio]	B-cell linker protein GN=BLNK OS=Gallus gallus (Chicken) PE=1 SV=1	SH2 domain
cycg029950	0.0378059	2.16413	UP	K01404	other genes related to immune response	mucin	PREDICTED: mucin-3A-like isoform X1 [Danio rerio]	Tenascin (Precursor) GN=TNC OS=Gallus gallus (Chicken) PE=1 SV=2	Fibronectin type III domain;; Fibrinogen beta and gamma chains, C-terminal globular domain;; Cytochrome P450
cycg014716	0.0327659	1.22592	UP	--	other genes related to immune response	myeloid cell related	PREDICTED: myeloid leukemia factor 1 isoform X3 [Danio rerio]	--	Myelodysplasia-myeloid leukemia factor 1-interacting protein
cycg017785	0.00467739	1.64931	UP	--	other genes related to immune response	nectin	nectin-1 [Danio rerio]	Nectin-3-like protein (Precursor) GN=pvrl3l OS=Danio rerio (Zebrafish) PE=2 SV=2	Immunoglobulin domain;; CD80-like C2-set immunoglobulin domain;; Immunoglobulin domain;; Immunoglobulin I-set domain;; Immunoglobulin V-set domain;; Immunoglobulin domain
cycg039405	0.00384124	1.88829	UP	--	other genes related to immune response	nectin	PREDICTED: nectin-4-like isoform X2 [Danio rerio]	Inactive tyrosine-protein kinase 7 (Precursor) GN=PTK7 OS=Gallus gallus (Chicken) PE=2 SV=1	Immunoglobulin domain;; Immunoglobulin V-set domain;; Immunoglobulin domain;; Immunoglobulin domain;; Immunoglobulin I-set domain
cycg033231	0.0149396	1.96986	UP	--	other genes related to immune response	nectin	PREDICTED: nectin-3-like protein [Danio rerio]	Nectin-3-like protein (Precursor) GN=pvrl3l OS=Danio rerio (Zebrafish) PE=2 SV=2	CD80-like C2-set immunoglobulin domain;; Immunoglobulin domain;; Immunoglobulin V-set domain;; Immunoglobulin I-set domain
cycg028121	4.99e-06	1.28382	UP	--	other genes related to immune response	palladin	PREDICTED: palladin isoform X1 [Danio rerio]	Myosin light chain kinase, smooth muscle, deglutamylated form GN=Mylk OS=Gallus gallus (Chicken) PE=1 SV=2	Immunoglobulin I-set domain;; Immunoglobulin domain;; Immunoglobulin domain;; Immunoglobulin domain;; Immunoglobulin V-set domain;; CD80-like C2-set immunoglobulin domain;; RNA recognition motif. (a.k.a. RRM, RBD, or RNP domain)
cycg019374	0.0194625	1.55207	UP	--	other genes related to immune response	palladin	PREDICTED: palladin isoform X2 [Danio rerio]	Striated muscle preferentially expressed protein kinase GN=speg OS=Danio rerio (Zebrafish) PE=2 SV=1	Immunoglobulin I-set domain;; Immunoglobulin domain;; Immunoglobulin domain;; Immunoglobulin domain;; Immunoglobulin V-set domain
cycg045682	0.00997827	1.34494	UP	K00922	other genes related to immune response	PI3K	phosphatidylinositol 4,5-bisphosphate 3-kinase catalytic subunit delta isoform [Danio rerio]	Phosphatidylinositol 3-kinase catalytic subunit type 3 GN=pik3c3 OS=Xenopus laevis (African clawed frog) PE=2 SV=1	Phosphatidylinositol 3- and 4-kinase;; Phosphoinositide 3-kinase family, accessory domain (PIK domain);; Phosphoinositide 3-kinase C2
cycg014721	0.00255011	2.07909	UP	K00922	other genes related to immune response	PI3K	PREDICTED: phosphatidylinositol 4,5-bisphosphate 3-kinase catalytic subunit gamma isoform [Danio rerio]	Phosphatidylinositol 3-kinase catalytic subunit type 3 GN=pik3c3 OS=Xenopus laevis (African clawed frog) PE=2 SV=1	Phosphatidylinositol 3- and 4-kinase;; Phosphoinositide 3-kinase family, accessory domain (PIK domain);; PI3-kinase family, ras-binding domain
cycg035508	3.13e-06	2.2999	UP	--	other genes related to immune response	rootletin	PREDICTED: rootletin-like isoform X2 [Danio rerio]	Myosin-3 GN=MYH3 OS=Gallus gallus (Chicken) PE=2 SV=3	--
cycg013194	0.00623265	2.40372	UP	--	other genes related to immune response	RTK	Eph-like receptor tyrosine kinase rtk4 [Danio rerio]	Ephrin type-A receptor 4-B (Precursor) GN=epha4-b OS=Xenopus laevis (African clawed frog) PE=2 SV=1	Ephrin receptor ligand binding domain;; Fibronectin type III domain
cycg009577	0.0401319	1.25221	UP	K05387	other genes related to immune response	TIAM	PREDICTED: T-lymphoma invasion and metastasis-inducing protein 1 isoform X1 [Danio rerio]	Glutamate receptor ionotropic, kainate 2 (Fragment) GN=grik2 OS=Xenopus laevis (African clawed frog) PE=2 SV=1	RhoGEF domain;; Pleckstrin homology domain;; PH domain;; Raf-like Ras-binding domain;; PDZ domain (Also known as DHR or GLGF);; Ligand-gated ion channel;; Ligated ion channel L-glutamate- and glycine-binding site;; Bacterial extracellular solute-binding proteins, family 3;; Receptor family ligand binding region
cycg026198	6.6e-06	1.89404	UP	--	other genes related to immune response	TRIM	suppression of tumorigenicity 5 protein [Danio rerio]	E3 ubiquitin-protein ligase TRIM33 GN=trim33 OS=Danio rerio (Zebrafish) PE=2 SV=1	DENN (AEX-3) domain;; uDENN domain;; dDENN domain;; PHD-finger;; B-box zinc finger
cycg038671	0.00822297	1.00385	UP	--	other genes related to immune response	TRIM	probable E3 ubiquitin-protein ligase TRIM8 [Danio rerio]	Nuclear factor 7, brain OS=Xenopus laevis (African clawed frog) PE=1 SV=1	zinc finger of C3HC4-type, RING;; Zinc finger, C3HC4 type (RING finger);; Zinc finger, C3HC4 type (RING finger);; RING-type zinc-finger;; Ring finger domain
cycg046067	0.00379644	1.31747	UP	K11997	other genes related to immune response	TRIM	PREDICTED: tripartite motif-containing protein 2 isoform X2 [Danio rerio]	E3 ubiquitin-protein ligase TRIM71 GN=trim71 OS=Danio rerio (Zebrafish) PE=2 SV=1	Filamin/ABP280 repeat;; NHL repeat
cycg027230	0.0404814	1.60671	UP	K15306	other genes related to immune response	TRIM	PREDICTED: E3 SUMO-protein ligase RanBP2-like [Neolamprologus brichardi]	E3 ubiquitin-protein ligase TRIM33 GN=trim33 OS=Xenopus laevis (African clawed frog) PE=1 SV=1	RanBP1 domain;; WH1 domain;; B-box zinc finger;; Uncharacterized conserved protein (DUF2203)
cycg013993	0.0118131	1.72876	UP	--	other genes related to immune response	TRIM	PREDICTED: E3 ubiquitin/ISG15 ligase TRIM25-like isoform X1 [Danio rerio]	Stonustoxin subunit beta OS=Synanceia horrida (Estuarine stonefish) PE=1 SV=3	SPRY-associated domain;; SPRY domain;; zinc finger of C3HC4-type, RING;; B-box zinc finger;; Zinc finger, C3HC4 type (RING finger);; Zinc finger, C3HC4 type (RING finger)
cycg041095	0.00305479	1.80204	UP	--	other genes related to immune response	TRIM	PREDICTED: E3 ubiquitin/ISG15 ligase TRIM25 [Danio rerio]	--	--
cycg002954	0.0337086	2.37828	UP	--	other genes related to immune response	TRIM	PREDICTED: E3 ubiquitin-protein ligase TRIM39-like [Astyanax mexicanus]	Zinc-binding protein A33 OS=Pleurodeles waltl (Iberian ribbed newt) PE=1 SV=2	SPRY-associated domain
cycg002943	0.00631327	2.38778	UP	--	other genes related to immune response	TRIM	PREDICTED: E3 ubiquitin-protein ligase TRIM39-like [Astyanax mexicanus]	Nuclear factor 7, brain OS=Xenopus laevis (African clawed frog) PE=1 SV=1	Zinc finger, C3HC4 type (RING finger);; Zinc finger, C3HC4 type (RING finger);; zinc finger of C3HC4-type, RING;; RING-type zinc-finger;; Ring finger domain;; Zinc finger, C3HC4 type (RING finger);; zinc-RING finger domain;; U-box domain;; Zinc-finger of the MIZ type in Nse subunit
cycg049790	0.0436816	2.40966	UP	--	other genes related to immune response	TRIM	PREDICTED: E3 ubiquitin/ISG15 ligase TRIM25-like isoform X3 [Danio rerio]	--	B-box zinc finger
cycg042020	0.0258839	2.47109	UP	--	other genes related to immune response	TRIM	PREDICTED: E3 ubiquitin-protein ligase TRIM39-like [Astyanax mexicanus]	Zinc-binding protein A33 OS=Pleurodeles waltl (Iberian ribbed newt) PE=1 SV=2	SPRY domain;; SPRY-associated domain
cycg023610	0.0306154	2.52543	UP	--	other genes related to immune response	TRIM	PREDICTED: E3 ubiquitin/ISG15 ligase TRIM25 [Danio rerio]	Stonustoxin subunit beta OS=Synanceia horrida (Estuarine stonefish) PE=1 SV=3	--
cycg002945	0.000224829	2.67248	UP	--	other genes related to immune response	TRIM	PREDICTED: E3 ubiquitin-protein ligase TRIM39-like [Astyanax mexicanus]	Nuclear factor 7, brain OS=Xenopus laevis (African clawed frog) PE=1 SV=1	SPRY domain;; SPRY-associated domain
cycg002946	0.000178015	2.75519	UP	--	other genes related to immune response	TRIM	PREDICTED: E3 ubiquitin-protein ligase TRIM39-like [Astyanax mexicanus]	Nuclear factor 7, brain OS=Xenopus laevis (African clawed frog) PE=1 SV=1	SPRY domain;; Zinc finger, C3HC4 type (RING finger);; Zinc finger, C3HC4 type (RING finger);; zinc finger of C3HC4-type, RING;; RING-type zinc-finger;; Zinc finger, C3HC4 type (RING finger);; Ring finger domain;; zinc-RING finger domain;; U-box domain;; Zinc-finger of the MIZ type in Nse subunit
cycg037640	0.00568149	3.02896	UP	--	other genes related to immune response	TRIM	PREDICTED: E3 ubiquitin-protein ligase TRIM11 [Danio rerio]	--	--
cycg042342	6.66e-05	3.14061	UP	--	other genes related to immune response	TRIM	PREDICTED: tripartite motif-containing protein 45 [Danio rerio]	E3 ubiquitin-protein ligase TRIM71 GN=trim71 OS=Danio rerio (Zebrafish) PE=2 SV=1	Filamin/ABP280 repeat;; B-box zinc finger;; zinc-RING finger domain;; Zinc finger, C3HC4 type (RING finger)
cycg000590	1.08e-06	3.33234	UP	--	other genes related to immune response	TRIM	PREDICTED: E3 ubiquitin/ISG15 ligase TRIM25 [Danio rerio]	Nuclear factor 7, brain OS=Xenopus laevis (African clawed frog) PE=1 SV=1	B-box zinc finger;; zinc finger of C3HC4-type, RING;; Zinc finger, C3HC4 type (RING finger);; Zinc finger, C3HC4 type (RING finger);; Ring finger domain;; Zinc finger, C3HC4 type (RING finger);; RING-type zinc-finger;; zinc-RING finger domain;; U-box domain
cycg047838	0.0198985	1.18491	UP	K15688	other genes related to immune response	ubiquitin ligase	E3 ubiquitin-protein ligase MYLIP-B [Danio rerio]	E3 ubiquitin-protein ligase MYLIP-B {ECO:0000250|UniProtKB:Q6TEM9} GN=zgc:153767 OS=Danio rerio (Zebrafish) PE=2 SV=1	FERM central domain;; Zinc finger, C3HC4 type (RING finger)
cycg005991	0.0324463	1.19519	UP	--	other genes related to immune response	ubiquitin ligase	uncharacterized protein LOC797544 [Danio rerio]	E3 ubiquitin-protein ligase SH3RF1 GN=sh3rf1 OS=Xenopus laevis (African clawed frog) PE=1 SV=1	Variant SH3 domain;; SH3 domain;; Variant SH3 domain
cycg003644	0.0240704	1.21434	UP	--	other genes related to immune response	ubiquitin ligase	PREDICTED: putative E3 ubiquitin-protein ligase SH3RF2 isoform X2 [Danio rerio]	E3 ubiquitin-protein ligase SH3RF1 GN=sh3rf1 OS=Xenopus laevis (African clawed frog) PE=1 SV=1	Variant SH3 domain;; SH3 domain;; Variant SH3 domain
cycg037269	0.000277557	1.282	UP	--	other genes related to immune response	ubiquitin ligase	PREDICTED: E3 ubiquitin/ISG15 ligase TRIM25 [Danio rerio]	Zinc-binding protein A33 OS=Pleurodeles waltl (Iberian ribbed newt) PE=1 SV=2	SPRY-associated domain;; Zinc finger, C3HC4 type (RING finger)
cycg008372	0.046413	1.37068	UP	--	other genes related to immune response	ubiquitin ligase	PREDICTED: E3 ubiquitin-protein ligase Midline-1 isoform X1 [Danio rerio]	Tripartite motif containing 13 GN=trim13 OS=Xenopus tropicalis (Western clawed frog) PE=3 SV=1	B-box zinc finger;; Zinc finger, C3HC4 type (RING finger);; Zinc finger, C3HC4 type (RING finger);; Zinc finger, C3HC4 type (RING finger);; Ring finger domain
cycg017889	0.0299692	1.40423	UP	--	other genes related to immune response	ubiquitin ligase	PREDICTED: E3 ubiquitin-protein ligase RNF213 isoform X1 [Danio rerio]	--	--
cycg015697	0.0462432	1.40763	UP	--	other genes related to immune response	ubiquitin ligase	LOC569187 protein, partial [Danio rerio]	G2/M phase-specific E3 ubiquitin-protein ligase GN=G2E3 OS=Gallus gallus (Chicken) PE=2 SV=1	PHD-like zinc-binding domain;; PHD-zinc-finger like domain
cycg019529	0.000720525	1.50637	UP	--	other genes related to immune response	ubiquitin ligase	PREDICTED: E3 ubiquitin-protein ligase SH3RF1-like [Maylandia zebra]	E3 ubiquitin-protein ligase SH3RF1 GN=sh3rf1 OS=Danio rerio (Zebrafish) PE=2 SV=2	Variant SH3 domain;; SH3 domain;; Variant SH3 domain;; Variant SH3 domain;; SH3 domain;; Variant SH3 domain
cycg011922	0.011222	1.52712	UP	--	other genes related to immune response	ubiquitin ligase	PREDICTED: E3 ubiquitin-protein ligase RNF213 isoform X1 [Danio rerio]	Coiled-coil domain-containing protein 85C-B GN=ccdc85cb OS=Danio rerio (Zebrafish) PE=2 SV=1	Uncharacterized conserved proteins (DUF2216)
cycg002336	0.0272271	1.60302	UP	--	other genes related to immune response	ubiquitin ligase	PREDICTED: putative E3 ubiquitin-protein ligase UNKL isoform X1 [Danio rerio]	--	Zinc finger C-x8-C-x5-C-x3-H type (and similar)
cycg004281	0.000230902	1.6601	UP	--	other genes related to immune response	ubiquitin ligase	PREDICTED: RING finger protein 224 [Danio rerio]	E3 ubiquitin-protein ligase RNF182 GN=rnf182 OS=Xenopus laevis (African clawed frog) PE=2 SV=1	Ring finger domain;; zinc-RING finger domain;; Zinc finger, C3HC4 type (RING finger)
cycg008748	0.00527389	1.67456	UP	K10592	other genes related to immune response	ubiquitin ligase	PREDICTED: E3 ubiquitin-protein ligase HECW2-like [Notothenia coriiceps]	E3 ubiquitin-protein ligase SMURF1 GN=smurf1 OS=Xenopus laevis (African clawed frog) PE=2 SV=1	HECT-domain (ubiquitin-transferase)
cycg002324	0.0160498	1.68354	UP	K16279	other genes related to immune response	ubiquitin ligase	PREDICTED: RING finger protein 223 [Danio rerio]	E3 ubiquitin-protein ligase rnf152 GN=rnf152 OS=Danio rerio (Zebrafish) PE=2 SV=1	Ring finger domain;; zinc-RING finger domain;; Zinc finger, C3HC4 type (RING finger);; Zinc finger, C3HC4 type (RING finger);; Zinc finger, C3HC4 type (RING finger)
cycg026491	0.00458417	1.68528	UP	K15692	other genes related to immune response	ubiquitin ligase	Ring finger protein 13 [Danio rerio]	E3 ubiquitin-protein ligase RNF13 (Precursor) GN=RNF13 OS=Gallus gallus (Chicken) PE=1 SV=1	PA domain
cycg041876	0.00716311	1.72969	UP	--	other genes related to immune response	ubiquitin ligase	ubiquitin-associated and SH3 domain-containing protein B [Danio rerio]	E3 ubiquitin-protein ligase SH3RF1 GN=sh3rf1 OS=Danio rerio (Zebrafish) PE=2 SV=2	Variant SH3 domain;; SH3 domain;; LigT like Phosphoesterase;; Histidine phosphatase superfamily (branch 1)
cycg018974	7.94e-05	1.73471	UP	--	other genes related to immune response	ubiquitin ligase	PREDICTED: E3 ubiquitin-protein ligase CBL-B [Danio rerio]	E3 ubiquitin-protein ligase CBL-B-A GN=cblb-a OS=Xenopus laevis (African clawed frog) PE=2 SV=1	CBL proto-oncogene N-terminus, EF hand-like domain;; CBL proto-oncogene N-terminal domain 1;; CBL proto-oncogene N-terminus, SH2-like domain
cycg027885	0.0307114	1.75882	UP	--	other genes related to immune response	ubiquitin ligase	PREDICTED: RING finger protein 223-like [Danio rerio]	E3 ubiquitin-protein ligase rnf152 GN=rnf152 OS=Danio rerio (Zebrafish) PE=2 SV=1	Ring finger domain;; Zinc finger, C3HC4 type (RING finger);; Zinc finger, C3HC4 type (RING finger)
cycg029388	0.00509739	1.88613	UP	--	other genes related to immune response	ubiquitin ligase	E3 ubiquitin-protein ligase SH3RF1 isoform 2 [Danio rerio]	E3 ubiquitin-protein ligase SH3RF1 GN=sh3rf1 OS=Danio rerio (Zebrafish) PE=2 SV=2	Variant SH3 domain;; SH3 domain;; Variant SH3 domain
cycg052287	3.36e-05	1.96127	UP	K10587	other genes related to immune response	ubiquitin ligase	PREDICTED: uncharacterized protein LOC100073325 isoform X1 [Danio rerio]	E3 ubiquitin-protein ligase SMURF2 GN=smurf2 OS=Danio rerio (Zebrafish) PE=2 SV=1	HECT-domain (ubiquitin-transferase)
cycg000740	0.0353559	2.01405	UP	--	other genes related to immune response	ubiquitin ligase	PREDICTED: E3 ubiquitin-protein ligase pellino homolog 1 [Danio rerio]	--	Pellino;; Pellino
cycg051326	0.00385077	2.1392	UP	K06058	other genes related to immune response	ubiquitin ligase	PREDICTED: E3 ubiquitin-protein ligase DTX4-like [Larimichthys crocea]	E3 ubiquitin-protein ligase DTX1 GN=dtx1 OS=Xenopus laevis (African clawed frog) PE=2 SV=1	WWE domain;; Ring finger domain;; Zinc finger, C3HC4 type (RING finger)
cycg023901	0.0286896	2.18191	UP	--	other genes related to immune response	ubiquitin ligase	PREDICTED: G2/M phase-specific E3 ubiquitin-protein ligase-like [Notothenia coriiceps]	--	HECT-domain (ubiquitin-transferase)
cycg003986	0.00308021	2.22066	UP	K10587	other genes related to immune response	ubiquitin ligase	PREDICTED: probable E3 ubiquitin-protein ligase HECTD2 isoform X1 [Danio rerio]	E3 ubiquitin-protein ligase SMURF2 GN=smurf2 OS=Xenopus laevis (African clawed frog) PE=2 SV=1	HECT-domain (ubiquitin-transferase)
cycg026303	0.00469888	2.53822	UP	--	other genes related to immune response	ubiquitin ligase	PREDICTED: probable E3 ubiquitin-protein ligase HECTD2 isoform X2 [Danio rerio]	--	HECT-domain (ubiquitin-transferase)
cycg042603	0.00312867	2.61772	UP	--	other genes related to immune response	ubiquitin ligase	PREDICTED: E3 ubiquitin-protein ligase RNF43 [Danio rerio]	E3 ubiquitin-protein ligase ZNRF3 (Precursor) GN=znrf3 OS=Danio rerio (Zebrafish) PE=1 SV=2	Ring finger domain;; RING-H2 zinc finger;; Zinc finger, C3HC4 type (RING finger);; Zinc finger, C3HC4 type (RING finger)
cycg047824	0.000623351	2.94734	UP	--	other genes related to immune response	ubiquitin ligase	PREDICTED: E3 ubiquitin-protein ligase NEURL3 isoform X2 [Danio rerio]	Neuralized-like protein 4 GN=neurl4 OS=Xenopus tropicalis (Western clawed frog) PE=2 SV=1	Neuralized
cycg036406	2.17e-07	3.53512	UP	K03070	other genes related to immune response	ubiquitin ligase	PREDICTED: RING finger protein 223 [Danio rerio]	E3 ubiquitin-protein ligase rnf152 GN=rnf152 OS=Danio rerio (Zebrafish) PE=2 SV=1	Ring finger domain;; zinc-RING finger domain;; Zinc finger, C3HC4 type (RING finger);; Zinc finger, C3HC4 type (RING finger);; Zinc finger, C3HC4 type (RING finger)
cycg048312	0.00529831	1.10282	UP	--	other genes related to immune response	ubiquitin related	ubinuclein 2a [Danio rerio]	B-cell CLL/lymphoma 9-like protein GN=bcl9l OS=Danio rerio (Zebrafish) PE=2 SV=1	Ubinuclein conserved middle domain;; HPC2 and ubinuclein domain
cycg004741	0.00382938	1.70396	UP	--	other genes related to immune response	ubiquitin related	PREDICTED: ubiquitin carboxyl-terminal hydrolase 20 isoform X2 [Danio rerio]	Ubiquitin carboxyl-terminal hydrolase 20 GN=usp20 OS=Danio rerio (Zebrafish) PE=3 SV=1	Ubiquitin carboxyl-terminal hydrolase
cycg020950	0.0402103	1.77496	UP	K11839	other genes related to immune response	ubiquitin related	PREDICTED: ubiquitin carboxyl-terminal hydrolase 2-like isoform X2 [Danio rerio]	Ubiquitin carboxyl-terminal hydrolase 2 GN=USP2 OS=Gallus gallus (Chicken) PE=2 SV=1	Ubiquitin carboxyl-terminal hydrolase;; Ubiquitin carboxyl-terminal hydrolase
cycg041048	0.00839518	2.04741	UP	K11855	other genes related to immune response	ubiquitin related	ubiquitin specific protease 18 [Carassius auratus]	Ubiquitin carboxyl-terminal hydrolase 22 GN=usp22 OS=Danio rerio (Zebrafish) PE=2 SV=1	Ubiquitin carboxyl-terminal hydrolase;; Ubiquitin carboxyl-terminal hydrolase
cycg051434	0.00425844	2.12814	UP	K11839	other genes related to immune response	ubiquitin related	PREDICTED: ubiquitin carboxyl-terminal hydrolase 43 [Danio rerio]	Ubiquitin carboxyl-terminal hydrolase 15 GN=usp15 OS=Xenopus tropicalis (Western clawed frog) PE=2 SV=2	Ubiquitin carboxyl-terminal hydrolase
cycg036454	1.44e-07	2.39063	UP	K08770	other genes related to immune response	UBL	ubquitin-like protein 2 [Carassius auratus]	Ubiquitin (Precursor; Fragment) OS=Xenopus laevis (African clawed frog) PE=1 SV=2	Ubiquitin family;; Ubiquitin-2 like Rad60 SUMO-like;; Nuclear pore localisation protein NPL4
cycg020452	0.00950752	1.76155	UP	--	pattern recognition	collectin	PREDICTED: collagen alpha-4(IV) chain isoform X2 [Danio rerio]	Collectin-12 GN=colec12 OS=Danio rerio (Zebrafish) PE=2 SV=1	C-terminal tandem repeated domain in type 4 procollagen;; Collagen triple helix repeat (20 copies)
cycg048383	2.89e-05	3.33087	UP	--	pattern recognition	collectin	Si:ch211-212m21.5 protein [Danio rerio]	Collectin-12 GN=colec12 OS=Danio rerio (Zebrafish) PE=2 SV=1	--
cycg000024	0.0354418	1.04125	UP	--	pattern recognition	C-type lectin	C-type lectin domain family 14 member A precursor [Danio rerio]	Low-density lipoprotein receptor-related protein 1 (Precursor) GN=LRP1 OS=Gallus gallus (Chicken) PE=2 SV=1	Lectin C-type domain;; Calcium-binding EGF domain
cycg052537	0.018328	2.60651	UP	--	pattern recognition	C-type lectin	C-type lectin 1 [Ctenopharyngodon idella]	Lectin (Precursor) GN=LEC OS=Pleurodeles waltl (Iberian ribbed newt) PE=1 SV=1	Lectin C-type domain
PB.1535	1.53e-06	3.83091	UP	--	pattern recognition	C-type lectin	C-type lectin 1 [Ctenopharyngodon idella]	Lectin (Precursor) GN=LEC OS=Pleurodeles waltl (Iberian ribbed newt) PE=1 SV=1	Lectin C-type domain
cycg031684	5.74e-07	3.93618	UP	--	pattern recognition	C-type lectin	uncharacterized protein LOC100001158 precursor [Danio rerio]	C-type lectin lectoxin-Thr1 (Precursor) OS=Thrasops jacksonii (Jackson&apos;s black tree snake) PE=2 SV=1	Lectin C-type domain;; Translation initiation factor IF-3, N-terminal domain
cycg005847	0.0262738	1.18819	UP	K10268	pattern recognition	FBXL	F-box/LRR-repeat protein 2 [Danio rerio]	F-box/LRR-repeat protein 7 GN=fbxl7 OS=Danio rerio (Zebrafish) PE=2 SV=1	Leucine Rich repeat;; Leucine Rich repeats (2 copies);; Leucine Rich Repeat;; Leucine rich repeat
cycg037352	0.0371028	1.68706	UP	--	pattern recognition	Fucolectin	PREDICTED: uncharacterized protein LOC799904 isoform X1 [Danio rerio]	Fucolectin-4 (Precursor) OS=Anguilla japonica (Japanese eel) PE=2 SV=1	F5/8 type C domain
cycg026202	0.0355451	2.32903	UP	--	pattern recognition	Fucolectin	PREDICTED: inter-alpha-trypsin inhibitor heavy chain H3-like [Neolamprologus brichardi]	Fucolectin-5 (Precursor) OS=Anguilla japonica (Japanese eel) PE=2 SV=1	Vault protein inter-alpha-trypsin domain;; F5/8 type C domain;; von Willebrand factor type A domain;; von Willebrand factor type A domain;; von Willebrand factor type A domain
PB.6705	0.018582	1.72818	UP	K17300	pattern recognition	Lgals3bpa	galectin-3-binding protein A precursor [Danio rerio]	Galectin-3-binding protein A (Precursor) GN=lgals3bpa OS=Danio rerio (Zebrafish) PE=2 SV=1	Scavenger receptor cysteine-rich domain;; BTB And C-terminal Kelch
cycg041200	0.0264625	1.87701	UP	--	pattern recognition	galectin	PREDICTED: galectin-3-like [Astyanax mexicanus]	Grifin GN=grifin OS=Danio rerio (Zebrafish) PE=1 SV=1	Galactoside-binding lectin
cycg016893	1.01e-10	3.6272	UP	--	pattern recognition	Lgals3bpa	galectin-3-binding protein A precursor [Danio rerio]	Galectin-3-binding protein A (Precursor) GN=lgals3bpa OS=Danio rerio (Zebrafish) PE=2 SV=1	Scavenger receptor cysteine-rich domain;; BTB And C-terminal Kelch
cycg018997	0.0153119	2.619	UP	--	pattern recognition	Hepatic lectin	uncharacterized protein LOC564690 [Danio rerio]	Hepatic lectin OS=Gallus gallus (Chicken) PE=1 SV=1	Lectin C-type domain
cycg026580	0.015801	1.57151	UP	--	pattern recognition	intelectin	PREDICTED: intelectin-1a-like [Danio rerio]	Intelectin-like protein {ECO:0000305|PubMed:22085437} OS=Alligator mississippiensis (American alligator) PE=1 SV=1	Low-density lipoprotein receptor domain class A;; Alpha-2-macroglobulin family N-terminal region
cycg017852	1.63e-06	3.21963	UP	--	pattern recognition	ladderlectin	uncharacterized protein LOC561255 precursor [Danio rerio]	Ladderlectin (Precursor) OS=Oncorhynchus mykiss (Rainbow trout) PE=1 SV=2	Lectin C-type domain
cycg017403	0.026225	1.00966	UP	--	pattern recognition	LRR-containing proteins	PREDICTED: leucine-rich repeat-containing protein 16C isoform X4 [Danio rerio]	Serine/arginine repetitive matrix protein 1 GN=SRRM1 OS=Gallus gallus (Chicken) PE=2 SV=1	Leucine Rich repeat;; Leucine Rich repeat
cycg013010	0.0142523	1.09952	UP	--	pattern recognition	LRR-containing proteins	leucine-rich repeat-containing protein 1 [Danio rerio]	Protein scribble homolog GN=scrib OS=Danio rerio (Zebrafish) PE=1 SV=1	Leucine Rich repeats (2 copies);; Leucine rich repeat;; Leucine Rich Repeat;; Leucine rich repeat
cycg005743	0.00518059	1.13055	UP	--	pattern recognition	LRR-containing proteins	PREDICTED: leucine-rich repeats and immunoglobulin-like domains protein 2 [Danio rerio]	Peroxidasin (Precursor) GN=pxdn OS=Xenopus tropicalis (Western clawed frog) PE=2 SV=1	Immunoglobulin I-set domain;; Immunoglobulin domain;; Immunoglobulin domain;; Immunoglobulin domain;; Immunoglobulin V-set domain;; CD80-like C2-set immunoglobulin domain;; Leucine rich repeat;; Leucine Rich repeats (2 copies);; Leucine Rich Repeat;; Leucine rich repeats (6 copies);; Leucine Rich repeat;; Leucine-rich repeat;; Leucine rich repeat
cycg017067	0.00262679	1.15717	UP	--	pattern recognition	LRR-containing proteins	leucine-rich repeat-containing protein 1 [Danio rerio]	Protein scribble homolog GN=scrib OS=Danio rerio (Zebrafish) PE=1 SV=1	Leucine Rich repeats (2 copies);; Leucine rich repeat;; Leucine Rich Repeat;; Leucine Rich repeats (2 copies);; Leucine rich repeat
cycg052139	0.000259278	1.23395	UP	--	pattern recognition	LRR-containing proteins	PREDICTED: melanotransferrin isoform X2 [Danio rerio]	Leucine-rich repeat-containing protein 40 GN=lrrc40 OS=Danio rerio (Zebrafish) PE=2 SV=1	Transferrin;; Leucine Rich repeats (2 copies);; Leucine rich repeat;; Leucine Rich Repeat;; ABC transporter, phosphonate, periplasmic substrate-binding protein;; Leucine rich repeat;; Leucine Rich repeats (2 copies);; Leucine Rich Repeat;; Leucine Rich repeat
cycg029477	0.0316743	1.25837	UP	--	pattern recognition	LRR-containing proteins	PREDICTED: leucine-rich repeat-containing protein 16B isoform X4 [Danio rerio]	--	--
cycg005428	0.0223436	1.26978	UP	--	pattern recognition	LRR-containing proteins	leucine-rich repeat-containing protein 8D [Danio rerio]	Volume-regulated anion channel subunit LRRC8E GN=lrrc8e OS=Xenopus tropicalis (Western clawed frog) PE=2 SV=1	A-kinase anchoring protein 95 (AKAP95);; Leucine-rich repeat containing protein 8;; Leucine rich repeat;; Leucine Rich repeats (2 copies);; Leucine Rich Repeat;; Leucine rich repeat
cycg031391	0.0213693	1.28682	UP	--	pattern recognition	LRR-containing proteins	PREDICTED: leucine-rich repeat flightless-interacting protein 2 isoform X2 [Danio rerio]	Leucine-rich repeat flightless-interacting protein 2 GN=lrrfip2 OS=Xenopus laevis (African clawed frog) PE=2 SV=2	Double stranded RNA binding protein (DUF2051)
cycg005431	0.00255324	1.49936	UP	--	pattern recognition	LRR-containing proteins	leucine-rich repeat-containing protein 8D [Danio rerio]	Volume-regulated anion channel subunit LRRC8E GN=lrrc8e OS=Xenopus tropicalis (Western clawed frog) PE=2 SV=1	A-kinase anchoring protein 95 (AKAP95);; Leucine-rich repeat containing protein 8;; Leucine rich repeat;; Leucine Rich repeats (2 copies);; Leucine Rich Repeat;; Leucine rich repeats (6 copies);; Leucine rich repeat
cycg022990	3.53e-05	1.6628	UP	--	pattern recognition	LRR-containing proteins	RecName: Full=Protein tilB homolog; AltName: Full=Leucine-rich repeat-containing 6-like protein; AltName: Full=Leucine-rich repeat-containing protein 6; AltName: Full=Seahorse [Danio rerio]	Protein tilB homolog GN=lrrc6 OS=Danio rerio (Zebrafish) PE=1 SV=1	Leucine Rich repeats (2 copies);; Leucine-rich repeat;; Leucine rich repeat
cycg043494	0.00677556	1.87803	UP	--	pattern recognition	LRR-containing proteins	PREDICTED: leucine-rich repeat-containing protein LOC400891-like [Takifugu rubripes]	Protein NipSnap homolog 2 GN=gbas OS=Danio rerio (Zebrafish) PE=2 SV=2	ACT domain;; NIPSNAP;; Leucine Rich repeat;; Leucine Rich repeats (2 copies);; Leucine Rich Repeat;; Leucine rich repeat
cycg003249	0.0206708	1.88999	UP	--	pattern recognition	LRR-containing proteins	PREDICTED: leucine-rich repeat-containing protein 17 isoform X1 [Danio rerio]	Leucine-rich repeat-containing protein 3 (Precursor) GN=lrrc3 OS=Danio rerio (Zebrafish) PE=2 SV=1	Leucine rich repeat;; Leucine Rich repeats (2 copies);; Leucine Rich Repeat;; Leucine-rich repeat;; Leucine rich repeats (6 copies);; Leucine Rich repeat
cycg007521	0.0340238	1.91572	UP	--	pattern recognition	LRR-containing proteins	PREDICTED: amphoterin-induced protein 1 [Danio rerio]	Leucine-rich repeat and fibronectin type III domain-containing protein 1-like protein (Precursor) GN=lrfn1l OS=Danio rerio (Zebrafish) PE=2 SV=1	Immunoglobulin V-set domain;; Immunoglobulin I-set domain;; Immunoglobulin domain
cycg022934	0.0435756	2.0736	UP	--	pattern recognition	LRR-containing proteins	PREDICTED: leucine-rich repeat neuronal protein 3-like [Danio rerio]	Leucine-rich repeat and immunoglobulin-like domain-containing nogo receptor-interacting protein 1 (Precursor) GN=lingo1 OS=Xenopus tropicalis (Western clawed frog) PE=2 SV=1	Leucine rich repeat;; Leucine Rich repeats (2 copies);; Leucine rich repeats (6 copies);; Immunoglobulin I-set domain;; Leucine Rich Repeat;; Leucine-rich repeat;; Fibronectin type III domain;; Immunoglobulin domain;; Immunoglobulin domain;; Immunoglobulin V-set domain
cycg047113	0.0232039	2.15288	UP	--	pattern recognition	LRR-containing proteins	PREDICTED: leucine-rich repeat neuronal protein 2 [Danio rerio]	Leucine-rich repeat and immunoglobulin-like domain-containing nogo receptor-interacting protein 1 (Precursor) GN=lingo1 OS=Xenopus tropicalis (Western clawed frog) PE=2 SV=1	Leucine rich repeat;; Leucine Rich repeats (2 copies);; Leucine rich repeats (6 copies);; Immunoglobulin I-set domain;; Leucine Rich Repeat;; Immunoglobulin domain;; Immunoglobulin V-set domain;; Immunoglobulin domain;; Immunoglobulin domain
cycg048714	0.000793368	2.20577	UP	--	pattern recognition	LRR-containing proteins	PREDICTED: uncharacterized protein LOC103024873 [Astyanax mexicanus]	Leucine-rich repeat and fibronectin type III domain-containing protein 1-like protein (Precursor) GN=lrfn1l OS=Danio rerio (Zebrafish) PE=2 SV=1	Leucine rich repeat;; Leucine Rich repeats (2 copies);; Leucine Rich Repeat;; Leucine rich repeats (6 copies);; Leucine Rich repeat;; Leucine rich repeat
cycg000429	0.0451246	2.29994	UP	--	pattern recognition	LRR-containing proteins	PREDICTED: leucine-rich repeat-containing protein 4C [Danio rerio]	Leucine-rich repeat and immunoglobulin-like domain-containing nogo receptor-interacting protein 1 (Precursor) GN=lingo1 OS=Xenopus tropicalis (Western clawed frog) PE=2 SV=1	Leucine rich repeat;; Leucine Rich repeats (2 copies);; Leucine rich repeats (6 copies);; Leucine Rich Repeat;; Immunoglobulin I-set domain;; Leucine rich repeat;; Immunoglobulin V-set domain;; Immunoglobulin domain;; Immunoglobulin domain;; Immunoglobulin domain
cycg050600	6.1e-12	2.32001	UP	--	pattern recognition	LRR-containing proteins	PREDICTED: leucine-rich repeat-containing G-protein coupled receptor 4 [Danio rerio]	Leucine-rich repeat-containing G-protein coupled receptor 4 (Precursor) GN=lgr4 OS=Danio rerio (Zebrafish) PE=2 SV=1	Leucine rich repeat;; Leucine Rich repeats (2 copies);; Leucine rich repeats (6 copies);; Leucine Rich Repeat;; Leucine rich repeat;; Leucine-rich repeat;; Leucine Rich repeat;; 7 transmembrane receptor (rhodopsin family)
cycg011625	0.00330056	2.35287	UP	--	pattern recognition	LRR-containing proteins	leucine-rich repeat transmembrane protein FLRT3 precursor [Danio rerio]	Biglycan (Precursor) GN=bgn OS=Xenopus laevis (African clawed frog) PE=2 SV=1	Leucine rich repeat;; Leucine Rich repeats (2 copies);; Leucine Rich Repeat;; Leucine rich repeats (6 copies);; Leucine rich repeat N-terminal domain
cycg043035	0.00463842	2.40924	UP	--	pattern recognition	LRR-containing proteins	PREDICTED: leucine-rich repeat-containing protein 10B [Danio rerio]	Malignant fibrous histiocytoma-amplified sequence 1 homolog GN=mfhas1 OS=Xenopus tropicalis (Western clawed frog) PE=2 SV=1	Leucine Rich repeats (2 copies);; Leucine rich repeat;; Leucine Rich Repeat;; Leucine rich repeat;; Leucine Rich repeats (2 copies);; Leucine Rich Repeat
cycg001558	2.38e-05	2.41598	UP	--	pattern recognition	LRR-containing proteins	unnamed protein product [Oncorhynchus mykiss]	--	Leucine-rich repeat family 19 TM domain
cycg048236	0.0339112	2.52633	UP	--	pattern recognition	LRR-containing proteins	PREDICTED: leucine-rich repeat transmembrane neuronal protein 4 isoform X1 [Danio rerio]	Peroxidasin (Precursor) GN=pxdn OS=Xenopus tropicalis (Western clawed frog) PE=2 SV=1	Leucine rich repeat;; Leucine Rich repeats (2 copies);; Leucine Rich Repeat;; Leucine Rich repeat;; Leucine rich repeat
cycg027549	0.0314162	2.55578	UP	--	pattern recognition	LRR-containing proteins	PREDICTED: leucine-rich repeat-containing protein 52-like [Danio rerio]	Vasorin (Precursor) GN=vasn OS=Xenopus tropicalis (Western clawed frog) PE=2 SV=1	Leucine rich repeat;; Leucine Rich repeats (2 copies);; Leucine Rich Repeat;; Leucine rich repeat
cycg039676	0.00472959	2.73534	UP	--	pattern recognition	LRR-containing proteins	PREDICTED: leucine-rich repeat and immunoglobulin-like domain-containing nogo receptor-interacting protein 1 [Danio rerio]	Leucine-rich repeat and immunoglobulin-like domain-containing nogo receptor-interacting protein 1 (Precursor) GN=LINGO1 OS=Gallus gallus (Chicken) PE=2 SV=1	Leucine rich repeat;; Leucine rich repeats (6 copies);; Leucine Rich repeats (2 copies);; Immunoglobulin I-set domain;; Leucine Rich Repeat;; Immunoglobulin domain;; Leucine rich repeat;; Immunoglobulin domain
cycg051111	0.00126552	2.80757	UP	--	pattern recognition	LRR-containing proteins	PREDICTED: leucine-rich repeat and fibronectin type-III domain-containing protein 2 isoform X1 [Danio rerio]	Leucine-rich repeat and fibronectin type III domain-containing protein 1-like protein (Precursor) GN=lrfn1l OS=Danio rerio (Zebrafish) PE=2 SV=1	Leucine rich repeat;; Leucine Rich repeats (2 copies);; Leucine Rich Repeat;; Immunoglobulin I-set domain;; Fibronectin type III domain
cycg025956	0.00170296	3.064	UP	--	pattern recognition	LRR-containing proteins	leucine-rich repeat-containing protein 14B [Danio rerio]	Leucine-rich repeat-containing protein 14B GN=lrrc14b OS=Danio rerio (Zebrafish) PE=3 SV=1	--
cycg019104	4.44e-06	3.11447	UP	--	pattern recognition	LRR-containing proteins	PREDICTED: leucine-rich repeat-containing protein 18 [Danio rerio]	Leucine-rich repeat-containing protein 40 GN=lrrc40 OS=Danio rerio (Zebrafish) PE=2 SV=1	Leucine Rich repeats (2 copies);; Leucine rich repeat;; Leucine Rich Repeat;; Leucine rich repeat;; Leucine Rich repeat
cycg035678	1.98e-05	3.45272	UP	--	pattern recognition	LRR-containing proteins	PREDICTED: leucine-rich repeat-containing protein 38-like isoform X1 [Danio rerio]	Leucine-rich repeat-containing G-protein coupled receptor 4 (Precursor) GN=lgr4 OS=Xenopus tropicalis (Western clawed frog) PE=1 SV=1	Leucine rich repeat;; Leucine Rich repeats (2 copies);; Leucine Rich Repeat;; Leucine rich repeat N-terminal domain
cycg047438	0.000454987	3.52548	UP	--	pattern recognition	LRR-containing proteins	PREDICTED: leucine-rich repeat-containing protein 38-like isoform X1 [Danio rerio]	Leucine-rich repeat-containing G-protein coupled receptor 4 (Precursor) GN=lgr4 OS=Xenopus tropicalis (Western clawed frog) PE=1 SV=1	Leucine rich repeat;; Leucine Rich repeats (2 copies);; Leucine Rich Repeat;; Leucine rich repeat N-terminal domain
cycg033885	4.81e-12	4.28487	UP	--	pattern recognition	LRR-containing proteins	PREDICTED: leucine rich repeat and Ig domain containing 4a isoform X1 [Danio rerio]	Leucine-rich repeat and immunoglobulin-like domain-containing nogo receptor-interacting protein 1 (Precursor) GN=LINGO1 OS=Gallus gallus (Chicken) PE=2 SV=1	Leucine rich repeat;; Leucine Rich repeats (2 copies);; Leucine Rich Repeat;; Leucine rich repeats (6 copies);; Immunoglobulin I-set domain;; Leucine rich repeat;; Leucine Rich repeat;; Immunoglobulin domain;; Immunoglobulin domain
cycg050603	7.42e-15	6.28565	UP	--	pattern recognition	LRR-containing proteins	PREDICTED: leucine-rich repeat-containing G-protein coupled receptor 4 [Danio rerio]	Leucine-rich repeat-containing G-protein coupled receptor 4 (Precursor) GN=lgr4 OS=Danio rerio (Zebrafish) PE=2 SV=1	7 transmembrane receptor (rhodopsin family)
cycg041516	0.00689652	2.1268	UP	--	pattern recognition	MRC	mannose receptor C1-like protein [Danio rerio]	Type-2 ice-structuring protein (Precursor) OS=Osmerus mordax (Rainbow smelt) PE=1 SV=1	Lectin C-type domain
cycg036742	3.21e-09	2.24563	UP	--	pattern recognition	MRC	mannose receptor C1-like protein [Danio rerio]	C-type lectin (Precursor) OS=Cerberus rynchops (Dog-faced water snake) PE=1 SV=1	Lectin C-type domain;; Lectin C-type domain
cycg044209	1.22e-05	3.98728	UP	--	pattern recognition	NITR	novel immune type receptor [Cyprinus carpio]	--	Immunoglobulin V-set domain;; Immunoglobulin I-set domain
cycg009837	0.024539	1.05585	UP	--	pattern recognition	RBL	PREDICTED: protein eva-1 homolog C isoform X1 [Danio rerio]	L-rhamnose-binding lectin CSL1 {ECO:0000303|Ref.1} OS=Oncorhynchus keta (Chum salmon) PE=1 SV=1	Galactose binding lectin domain;; FAM176 family
cycg036171	0.00453993	3.00665	UP	K13912	pattern recognition	scavenger receptor	PREDICTED: scavenger receptor cysteine-rich type 1 protein M130-like isoform X3 [Danio rerio]	Lysyl oxidase homolog 2 (Precursor) GN=loxl2 OS=Xenopus tropicalis (Western clawed frog) PE=2 SV=2	Scavenger receptor cysteine-rich domain
cycg037087	1.63e-05	4.08869	UP	K13912	pattern recognition	scavenger receptor	PREDICTED: scavenger receptor cysteine-rich type 1 protein M130 [Danio rerio]	Lysyl oxidase homolog 2 (Precursor) GN=loxl2 OS=Xenopus laevis (African clawed frog) PE=2 SV=1	Scavenger receptor cysteine-rich domain;; Scavenger receptor cysteine-rich domain
cycg007032	0.000657956	2.09029	UP	--	pattern recognition	SIGLEC	PREDICTED: sialic acid-binding Ig-like lectin 13 [Danio rerio]	Schwann cell myelin protein (Precursor) GN=SMP OS=Coturnix coturnix japonica (Japanese quail) PE=1 SV=1	--
cycg009819	0.0243255	1.42401	UP	--	pattern recognition	TLR 8	PREDICTED: toll-like receptor 8 [Danio rerio]	Toll-like receptor 2 type-1 (Precursor) GN=TLR2-1 OS=Gallus gallus (Chicken) PE=2 SV=1	Leucine rich repeat;; C2 domain;; Leucine Rich repeats (2 copies);; Leucine Rich Repeat;; TIR domain;; Leucine Rich repeat;; Leucine rich repeat;; Plant phosphoribosyltransferase C-terminal
cycg014825	0.000232548	1.89938	UP	--	pattern recognition	TLR13	PREDICTED: toll-like receptor 13 [Danio rerio]	Toll-like receptor 2 type-2 (Precursor) GN=TLR2-2 OS=Gallus gallus (Chicken) PE=2 SV=1	Leucine rich repeat;; TIR domain;; TIR domain;; Leucine Rich repeats (2 copies);; MTH538 TIR-like domain (DUF1863)
cycg031705	0.00862015	1.98481	UP	K10717	pattern recognition	TLR3	toll-like receptor 3.1 [Cyprinus carpio]	Cytochrome P450 3A56 GN=cyp3a56 OS=Fundulus heteroclitus (Killifish) PE=2 SV=1	Leucine rich repeat;; Leucine Rich repeats (2 copies);; TIR domain;; Leucine rich repeats (6 copies);; Cytochrome P450;; Leucine Rich Repeat;; TIR domain;; Leucine rich repeat;; Cytochrome P450
cycg040498	0.00195095	1.90329	UP	--	pattern recognition	TLR9	toll-like receptor 9 [Cyprinus carpio]	Toll-like receptor 2 type-1 (Precursor) GN=TLR2-1 OS=Gallus gallus (Chicken) PE=2 SV=1	Leucine rich repeat;; Leucine Rich repeats (2 copies);; Leucine Rich Repeat;; TIR domain;; Leucine rich repeat;; Leucine rich repeats (6 copies)
cycg042398	0.0408426	1.05941	UP	--	T/B cell antigen activation	B-cell CLL/lymphoma	PREDICTED: B-cell CLL/lymphoma 9 protein isoform X1 [Danio rerio]	B-cell CLL/lymphoma 9-like protein GN=bcl9l OS=Danio rerio (Zebrafish) PE=2 SV=1	B-cell lymphoma 9 protein
PB.1234	0.00775738	1.63045	UP	--	T/B cell antigen activation	CD2	CD2 family receptor [Carassius auratus langsdorfii]	--	Immunoglobulin V-set domain;; Immunoglobulin I-set domain;; Natural killer cell receptor 2B4
cycg043245	0.00706766	1.49863	UP	--	T/B cell antigen activation	CD22	B-cell receptor CD22 precursor [Danio rerio]	Schwann cell myelin protein (Precursor) GN=SMP OS=Coturnix coturnix japonica (Japanese quail) PE=1 SV=1	Immunoglobulin domain;; Immunoglobulin domain;; Immunoglobulin I-set domain;; Immunoglobulin V-set domain;; Immunoglobulin domain;; CD80-like C2-set immunoglobulin domain
cycg010353	0.000686637	1.80403	UP	--	T/B cell antigen activation	CD22	B-cell receptor CD22 precursor [Danio rerio]	Opioid-binding protein/cell adhesion molecule homolog (Precursor) GN=OPCML OS=Gallus gallus (Chicken) PE=1 SV=2	Immunoglobulin domain;; Immunoglobulin I-set domain;; Immunoglobulin domain;; Immunoglobulin V-set domain;; Immunoglobulin domain;; CD80-like C2-set immunoglobulin domain
cycg010351	9.85e-05	1.92556	UP	--	T/B cell antigen activation	CD22	B-cell receptor CD22 precursor [Danio rerio]	Neural cell adhesion molecule 1 (Precursor) GN=NCAM1 OS=Gallus gallus (Chicken) PE=1 SV=3	Immunoglobulin domain;; Immunoglobulin I-set domain;; Immunoglobulin domain;; Immunoglobulin domain;; Immunoglobulin V-set domain;; Immunoglobulin C2-set domain;; CD80-like C2-set immunoglobulin domain
cycg035589	0.00334866	2.21537	UP	--	T/B cell antigen activation	CD22	PREDICTED: B-cell receptor CD22 [Danio rerio]	Schwann cell myelin protein (Precursor) GN=SMP OS=Coturnix coturnix japonica (Japanese quail) PE=1 SV=1	Immunoglobulin domain;; CD80-like C2-set immunoglobulin domain
cycg019070	0.0422379	2.39125	UP	--	T/B cell antigen activation	CD22	PREDICTED: B-cell receptor CD22-like [Danio rerio]	Schwann cell myelin protein (Precursor) GN=SMP OS=Coturnix coturnix japonica (Japanese quail) PE=1 SV=1	Immunoglobulin domain;; Immunoglobulin domain;; Immunoglobulin domain;; Immunoglobulin I-set domain;; Immunoglobulin V-set domain;; CD80-like C2-set immunoglobulin domain
cycg036623	0.0169167	1.31614	UP	--	T/B cell antigen activation	CD276	PREDICTED: butyrophilin subfamily 1 member A1-like [Danio rerio]	CD276 antigen homolog (Precursor) GN=cd276 OS=Xenopus laevis (African clawed frog) PE=2 SV=1	Immunoglobulin V-set domain;; Immunoglobulin I-set domain;; Immunoglobulin domain;; CD80-like C2-set immunoglobulin domain;; Immunoglobulin domain;; Immunoglobulin V-set domain;; Immunoglobulin I-set domain;; Immunoglobulin domain;; CD47 immunoglobulin-like domain
cycg013492	0.00446589	2.35464	UP	--	T/B cell antigen activation	CD4	CD4-like protein [Carassius auratus langsdorfii]	--	Immunoglobulin V-set domain;; Immunoglobulin domain
cycg014349	0.0216503	1.27731	UP	K13912	T/B cell antigen activation	CD6	PREDICTED: T-cell differentiation antigen CD6-like isoform X4 [Danio rerio]	Galectin-3-binding protein A (Precursor) GN=lgals3bpa OS=Danio rerio (Zebrafish) PE=2 SV=1	Scavenger receptor cysteine-rich domain
cycg041855	0.0218979	1.21968	UP	--	T/B cell antigen activation	FCR	IgE Fc receptor high affinity I gamma polypeptide [Ctenopharyngodon idella]	--	T-cell surface glycoprotein CD3 zeta chain
cycg041205	0.0405091	1.98058	UP	--	T/B cell antigen activation	FCR	PREDICTED: Fc receptor-like protein 5 [Danio rerio]	--	Immunoglobulin domain;; Immunoglobulin domain;; Immunoglobulin domain
cycg011549	0.0479444	2.27779	UP	--	T/B cell antigen activation	FCR	PREDICTED: Fc receptor-like protein 5 [Danio rerio]	Inactive tyrosine-protein kinase 7 (Precursor) GN=PTK7 OS=Gallus gallus (Chicken) PE=2 SV=1	Immunoglobulin domain;; Immunoglobulin domain;; Immunoglobulin I-set domain;; Immunoglobulin domain;; Immunoglobulin domain;; Immunoglobulin domain
cycg016547	0.00342088	3.03942	UP	--	T/B cell antigen activation	FCR	PREDICTED: Fc receptor-like protein 5 [Danio rerio]	MAM domain-containing glycosylphosphatidylinositol anchor protein 1 (Precursor) OS=Gallus gallus (Chicken) PE=1 SV=1	Immunoglobulin domain;; Immunoglobulin domain;; Immunoglobulin V-set domain;; Immunoglobulin domain;; Immunoglobulin I-set domain;; Alphaherpesvirus glycoprotein E
cycg045141	5.95e-05	4.0731	UP	--	T/B cell antigen activation	FCR	PREDICTED: LOW QUALITY PROTEIN: Fc receptor-like protein 5 [Danio rerio]	--	--
cycg031534	0.0120185	1.60229	UP	--	T/B cell antigen activation	GATA and related	GATA binding protein 2a [Danio rerio]	GATA-binding factor 2 GN=GATA2 OS=Gallus gallus (Chicken) PE=2 SV=1	GATA zinc finger
cycg015809	0.0438443	2.33787	UP	K11418	T/B cell antigen activation	HDAC	histone deacetylase 11 [Danio rerio]	--	--
cycg003021	0.0304941	1.73932	UP	--	T/B cell antigen activation	Ig heavy chain	immunoglobulin heavy chain constant region [Ctenopharyngodon idella]	--	Immunoglobulin C1-set domain
cycg045178	0.00288719	2.29034	UP	--	T/B cell antigen activation	Ig heavy chain	immunoglobulin Z heavy chain [Ctenopharyngodon idella]	Receptor-type tyrosine-protein phosphatase eta (Precursor) GN=PTPRJ OS=Gallus gallus (Chicken) PE=2 SV=2	Immunoglobulin C1-set domain;; Protein-tyrosine phosphatase
cycg001082	0.0329138	1.48731	UP	--	T/B cell antigen activation	Ig light chain	immunoglobulin light chain [Cyprinus carpio]	--	--
cycg035309	0.00831437	1.73488	UP	--	T/B cell antigen activation	Ig light chain	immunoglobulin light chain [Danio rerio]	--	--
cycg008105	0.000315791	2.94364	UP	--	T/B cell antigen activation	Ig light chain	immunoglobulin light chain [Cyprinus carpio]	Ig lambda chain V-1 region (Precursor) OS=Gallus gallus (Chicken) PE=4 SV=1	Immunoglobulin V-set domain;; Immunoglobulin domain;; Immunoglobulin I-set domain;; Immunoglobulin domain
cycg027942	3.21e-07	4.88104	UP	--	T/B cell antigen activation	Ig light chain	immunoglobulin light chain [Cyprinus carpio]	Ig lambda chain C region OS=Gallus gallus (Chicken) PE=4 SV=1	Immunoglobulin C1-set domain;; Immunoglobulin domain;; CD80-like C2-set immunoglobulin domain
cycg013234	0.0228706	1.19471	UP	--	T/B cell antigen activation	immunoglobulin superfamily	immunoglobulin superfamily member 11 precursor [Danio rerio]	Coxsackievirus and adenovirus receptor homolog (Precursor) GN=cxadr OS=Danio rerio (Zebrafish) PE=2 SV=1	Immunoglobulin domain;; Immunoglobulin I-set domain;; Immunoglobulin V-set domain;; Immunoglobulin domain;; Immunoglobulin domain
cycg019414	0.0106089	2.57799	UP	--	T/B cell antigen activation	immunoglobulin superfamily	immunoglobulin superfamily member 11 precursor [Danio rerio]	V-set and immunoglobulin domain-containing protein 1 (Precursor) GN=vsig1 OS=Xenopus laevis (African clawed frog) PE=2 SV=1	Immunoglobulin I-set domain;; Immunoglobulin domain;; Immunoglobulin domain;; Immunoglobulin V-set domain;; Immunoglobulin domain
cycg029618	0.0358694	1.27078	UP	--	T/B cell antigen activation	JAG	PREDICTED: protein jagged-2-like isoform X2 [Danio rerio]	Protein jagged-1b (Precursor) GN=jag1b OS=Danio rerio (Zebrafish) PE=2 SV=1	EGF-like domain;; Delta serrate ligand;; EGF-like domain;; Human growth factor-like EGF
cycg010715	0.0256184	1.86283	UP	--	T/B cell antigen activation	JAG	protein jagged-1b precursor [Danio rerio]	Protein jagged-1b (Precursor) GN=jag1b OS=Danio rerio (Zebrafish) PE=2 SV=1	EGF-like domain;; N terminus of Notch ligand;; Delta serrate ligand;; Human growth factor-like EGF;; EGF-like domain;; Calcium-binding EGF domain
cycg002607	7.33e-09	4.03407	UP	--	T/B cell antigen activation	JAG	PREDICTED: protein jagged-2-like isoform X2 [Danio rerio]	Protein jagged-1b (Precursor) GN=jag1b OS=Danio rerio (Zebrafish) PE=2 SV=1	EGF-like domain;; Delta serrate ligand;; EGF-like domain;; Human growth factor-like EGF;; Calcium-binding EGF domain;; EGF-like domain
cycg023128	0.039477	1.314	UP	--	T/B cell antigen activation	LAG	PREDICTED: lymphocyte activation gene 3 protein-like [Astyanax mexicanus]	Macrophage colony-stimulating factor 1 receptor 2 (Precursor) GN=csf1r2 OS=Takifugu rubripes (Japanese pufferfish) PE=3 SV=1	Immunoglobulin V-set domain;; Immunoglobulin domain;; Immunoglobulin I-set domain;; Immunoglobulin domain;; Immunoglobulin domain
cycg033370	0.00120058	1.65979	UP	--	T/B cell antigen activation	MAL	T-lymphocyte maturation-associated protein-like [Danio rerio]	MARVEL domain-containing protein 1 GN=marveld1 OS=Xenopus laevis (African clawed frog) PE=2 SV=1	Membrane-associating domain
cycg025336	0.011635	1.45832	UP	--	T/B cell antigen activation	NFAT	PREDICTED: nuclear factor of activated T-cells, cytoplasmic 2-like [Danio rerio]	--	--
cycg017165	0.0295477	1.56643	UP	--	T/B cell antigen activation	NFAT	PREDICTED: nuclear factor of activated T-cells 5-like isoform X2 [Danio rerio]	Nuclear factor NF-kappa-B p52 subunit GN=NFKB2 OS=Gallus gallus (Chicken) PE=1 SV=1	Rel homology domain (RHD);; IPT/TIG domain
cycg047936	5.52e-07	2.97818	UP	--	T/B cell antigen activation	NFAT	PREDICTED: nuclear factor of activated T-cells 5-like isoform X2 [Danio rerio]	--	IPT/TIG domain;; Rel homology domain (RHD)
cycg050883	0.0347203	1.66455	UP	--	T/B cell antigen activation	PIGR	PREDICTED: polymeric immunoglobulin receptor-like [Danio rerio]	--	Immunoglobulin V-set domain;; Immunoglobulin domain;; Immunoglobulin domain;; Immunoglobulin I-set domain;; Immunoglobulin domain
cycg012699	4.08e-05	1.88397	UP	--	T/B cell antigen activation	PIGR	PREDICTED: polymeric immunoglobulin receptor-like [Danio rerio]	--	Immunoglobulin V-set domain;; Immunoglobulin domain;; Immunoglobulin I-set domain;; Immunoglobulin domain
cycg041222	0.00327611	2.31803	UP	--	T/B cell antigen activation	PIGR	PREDICTED: polymeric immunoglobulin receptor-like [Danio rerio]	--	Immunoglobulin V-set domain;; Immunoglobulin domain;; Immunoglobulin V-set domain;; Immunoglobulin domain
cycg042170	0.000659259	2.57126	UP	--	T/B cell antigen activation	PIGR	PREDICTED: polymeric immunoglobulin receptor-like [Danio rerio]	--	Immunoglobulin V-set domain;; Immunoglobulin domain;; Immunoglobulin I-set domain;; Immunoglobulin domain;; Immunoglobulin domain
cycg038928	0.000125528	2.78664	UP	--	T/B cell antigen activation	PIGR	PREDICTED: polymeric immunoglobulin receptor-like [Danio rerio]	--	Immunoglobulin V-set domain;; Immunoglobulin domain;; Immunoglobulin I-set domain;; Immunoglobulin domain;; Immunoglobulin domain
cycg003798	0.0282529	1.00058	UP	--	T/B cell antigen activation	PKC	PREDICTED: protein kinase C theta type isoform X2 [Danio rerio]	Protein kinase C beta type GN=prkcbb OS=Danio rerio (Zebrafish) PE=2 SV=1	Protein kinase domain;; Protein tyrosine kinase;; Phorbol esters/diacylglycerol binding domain (C1 domain);; Protein kinase C terminal domain
cycg027443	0.0118771	1.01522	UP	K04456	T/B cell antigen activation	PKC	PREDICTED: protein kinase C alpha type isoform X1 [Danio rerio]	Protein kinase C beta type GN=prkcbb OS=Danio rerio (Zebrafish) PE=2 SV=1	Protein kinase domain;; Protein tyrosine kinase;; Protein kinase C terminal domain
cycg010495	0.038349	1.53888	UP	K04456	T/B cell antigen activation	PKC	PREDICTED: protein kinase C epsilon type isoform X2 [Danio rerio]	Protein kinase C beta type GN=prkcbb OS=Danio rerio (Zebrafish) PE=2 SV=1	Protein kinase domain;; Protein tyrosine kinase;; Phorbol esters/diacylglycerol binding domain (C1 domain);; Protein kinase C terminal domain
cycg002516	0.00617765	1.56651	UP	K04456	T/B cell antigen activation	PKC	PREDICTED: protein kinase C beta type isoform X1 [Danio rerio]	Protein kinase C beta type GN=prkcbb OS=Danio rerio (Zebrafish) PE=2 SV=1	Protein kinase domain;; Protein tyrosine kinase;; C2 domain;; Phorbol esters/diacylglycerol binding domain (C1 domain)
cycg018924	0.00078823	2.00226	UP	K04456	T/B cell antigen activation	PKC	PREDICTED: protein kinase C eta type [Esox lucius]	Protein kinase C iota type GN=prkci OS=Danio rerio (Zebrafish) PE=2 SV=2	Protein kinase domain;; Protein tyrosine kinase;; Phorbol esters/diacylglycerol binding domain (C1 domain);; C2 domain;; Protein kinase C terminal domain
cycg048413	0.0200121	1.17648	UP	--	T/B cell antigen activation	SEMA	semaphorin-3G precursor [Danio rerio]	Semaphorin-3E (Precursor) GN=SEMA3E OS=Gallus gallus (Chicken) PE=2 SV=1	Sema domain;; Sema domain
cycg008195	0.0013021	1.239	UP	--	T/B cell antigen activation	SEMA	PREDICTED: sema domain, immunoglobulin domain (Ig), short basic domain, secreted, (semaphorin) 3Gb isoform X2 [Danio rerio]	Semaphorin-3C (Precursor) GN=SEMA3C OS=Gallus gallus (Chicken) PE=2 SV=1	Sema domain;; Plexin repeat;; Immunoglobulin V-set domain
cycg016255	0.0336495	1.28867	UP	--	T/B cell antigen activation	SEMA	PREDICTED: semaphorin-6A isoform X3 [Astyanax mexicanus]	--	--
cycg010032	0.0236925	1.34888	UP	--	T/B cell antigen activation	SEMA	PREDICTED: semaphorin-6D isoform X1 [Danio rerio]	Semaphorin-3D (Precursor) GN=SEMA3D OS=Gallus gallus (Chicken) PE=2 SV=1	Sema domain;; Plexin repeat
cycg048955	0.0389265	1.36465	UP	--	T/B cell antigen activation	SEMA	semaphorin-4E isoform 1 precursor [Danio rerio]	Semaphorin-4E (Precursor) GN=sema4e OS=Danio rerio (Zebrafish) PE=2 SV=1	Sema domain;; Plexin repeat;; Immunoglobulin domain
cycg036143	0.00101762	1.53329	UP	--	T/B cell antigen activation	SEMA	PREDICTED: semaphorin-4F isoform X2 [Danio rerio]	Semaphorin-4E (Precursor) GN=sema4e OS=Danio rerio (Zebrafish) PE=2 SV=1	Sema domain;; Plexin repeat
cycg017413	0.00848772	1.57129	UP	--	T/B cell antigen activation	SEMA	PREDICTED: semaphorin-4B isoform X1 [Danio rerio]	Semaphorin-4E (Precursor) GN=sema4e OS=Danio rerio (Zebrafish) PE=2 SV=1	Sema domain;; Plexin repeat
cycg020954	0.00882585	1.58464	UP	--	T/B cell antigen activation	SEMA	PREDICTED: semaphorin-4D isoform X1 [Danio rerio]	Semaphorin-4E (Precursor) GN=sema4e OS=Danio rerio (Zebrafish) PE=2 SV=1	Sema domain;; Plexin repeat;; Immunoglobulin domain;; Immunoglobulin I-set domain;; Immunoglobulin domain
cycg018020	8.76e-06	1.66348	UP	--	T/B cell antigen activation	SEMA	PREDICTED: semaphorin-6D isoform X1 [Danio rerio]	Semaphorin-3D (Precursor) GN=SEMA3D OS=Gallus gallus (Chicken) PE=2 SV=1	Sema domain;; Plexin repeat
cycg026489	0.0182332	1.89333	UP	--	T/B cell antigen activation	SEMA	semaphorin 5a, partial [Danio rerio]	Thrombospondin-1 (Precursor) GN=thbs1 OS=Xenopus laevis (African clawed frog) PE=2 SV=1	Thrombospondin type 1 domain
cycg041083	0.000555046	2.01901	UP	--	T/B cell antigen activation	SEMA	PREDICTED: semaphorin-4D isoform X2 [Danio rerio]	Semaphorin-4E (Precursor) GN=sema4e OS=Danio rerio (Zebrafish) PE=2 SV=1	Sema domain;; Plexin repeat;; Immunoglobulin domain;; Immunoglobulin I-set domain;; Immunoglobulin domain
cycg046433	1.98e-06	2.08245	UP	--	T/B cell antigen activation	SEMA	Semaphorin 3aa [Danio rerio]	Semaphorin-3aa (Precursor) GN=sema3aa OS=Danio rerio (Zebrafish) PE=2 SV=1	Immunoglobulin V-set domain;; Plexin repeat
cycg050815	6.95e-07	2.33934	UP	--	T/B cell antigen activation	SEMA	PREDICTED: semaphorin-5A isoform X2 [Danio rerio]	Semaphorin-3A (Precursor) GN=SEMA3A OS=Gallus gallus (Chicken) PE=1 SV=1	Sema domain;; Thrombospondin type 1 domain;; Plexin repeat
cycg050184	1.38e-05	2.34272	UP	--	T/B cell antigen activation	SEMA	Semaphorin 3aa [Danio rerio]	Semaphorin-3aa (Precursor) GN=sema3aa OS=Danio rerio (Zebrafish) PE=2 SV=1	Sema domain;; Plexin repeat
cycg050811	0.00256626	2.36999	UP	--	T/B cell antigen activation	SEMA	semaphorin 5a, partial [Danio rerio]	Thrombospondin-2 (Precursor) GN=THBS2 OS=Gallus gallus (Chicken) PE=2 SV=1	Thrombospondin type 1 domain
cycg051174	0.0216971	2.58786	UP	--	T/B cell antigen activation	SEMA	PREDICTED: semaphorin-3C [Danio rerio]	Semaphorin-3C (Precursor) GN=SEMA3C OS=Gallus gallus (Chicken) PE=2 SV=1	Sema domain;; Immunoglobulin V-set domain;; Immunoglobulin I-set domain
cycg014751	1.67e-11	5.07082	UP	--	T/B cell antigen activation	SEMA	PREDICTED: semaphorin-6C isoform X3 [Danio rerio]	--	--
cycg010514	0.0163893	1.12247	UP	--	T/B cell antigen activation	T-bet	T-box transcription factor T-bet [Cyprinus carpio]	Eomesodermin GN=eomes OS=Xenopus laevis (African clawed frog) PE=2 SV=1	--
cycg040743	0.0181149	2.67915	UP	--	T/B cell antigen activation	VSIG	PREDICTED: V-set and immunoglobulin domain-containing protein 10-like isoform X1 [Danio rerio]	Epithelial membrane protein 2 OS=Danio rerio (Zebrafish) PE=2 SV=2	PMP-22/EMP/MP20/Claudin family;; Immunoglobulin I-set domain;; PMP-22/EMP/MP20/Claudin tight junction;; Immunoglobulin domain;; Immunoglobulin domain;; Fibronectin type III domain;; Immunoglobulin domain
cycg051305	0.0133196	1.37236	UP	--	T/B cell antigen activation	VTCN	PREDICTED: V-set domain-containing T-cell activation inhibitor 1-like [Danio rerio]	CD276 antigen homolog (Precursor) GN=cd276 OS=Xenopus laevis (African clawed frog) PE=2 SV=1	Immunoglobulin V-set domain;; Immunoglobulin I-set domain
cycg038237	0.0272755	1.3457	UP	K04730	T/B cell antigen activation	ZAP	tyrosine-protein kinase ZAP-70 [Danio rerio]	Tyrosine-protein kinase SYK GN=SYK OS=Gallus gallus (Chicken) PE=1 SV=2	SH2 domain;; Protein tyrosine kinase;; Protein kinase domain
cycg052548	7.26532e-08	1.89744	UP	K15607	T/B cell antigen activation	TLX	PREDICTED: T-cell leukemia homeobox protein 3-like [Danio rerio]	T-cell leukemia homeobox protein 3 GN=TLX3 OS=Gallus gallus (Chicken) PE=2 SV=1	Homeobox domain

## Sheet: NBS-advantage immune DEGs
#ID	FDR	log2FC	regulated	KO	immune process	immune gene category	nr_annotation	Swissprot_annotation	Pfam_annotation	Specific KEGG pathway
cycg013347	0.00553177	-3.13285	DOWN	--	acute phase reactions	macroglobulin	PREDICTED: alpha-2-macroglobulin-like protein 1 [Danio rerio]	--	--
cycg043083	0.0116285	-2.90715	DOWN	K06530	acute phase reactions	macroglobulin	PREDICTED: alpha-2-macroglobulin-like protein 1 [Danio rerio]	Ovostatin (Precursor) OS=Gallus gallus (Chicken) PE=1 SV=3	Alpha-macro-globulin thiol-ester bond-forming region
cycg011070	0.0226174	-2.67849	DOWN	--	adapters, effectors and signal transducers	CSF	PREDICTED: colony stimulating factor 3 (granulocyte) isoform X1 [Danio rerio]	--	Interleukin-6/G-CSF/MGF family
cycg047712	0.0176814	-1.64712	DOWN	--	adapters, effectors and signal transducers	CSFR	colony stimulating factor 1 receptor precursor membrane-bound form [Carassius auratus]	Macrophage colony-stimulating factor 1 receptor (Precursor) GN=csf1r OS=Danio rerio (Zebrafish) PE=2 SV=1	Protein tyrosine kinase;; Protein kinase domain;; Immunoglobulin domain;; Immunoglobulin domain;; Immunoglobulin domain;; Immunoglobulin domain;; Protein tyrosine kinase
cycg035316	0.00208173	-1.23244	DOWN	--	adapters, effectors and signal transducers	CSFR	PREDICTED: colony stimulating factor 2 receptor, beta, low-affinity (granulocyte-macrophage) isoform X1 [Danio rerio]	--	Interleukin-6 receptor alpha chain, binding;; Fibronectin type III domain;; Erythropoietin receptor, ligand binding
cycg001603	0.00177446	-1.52199	DOWN	--	adapters, effectors and signal transducers	JAK1	PREDICTED: tyrosine-protein kinase JAK1-like [Astyanax mexicanus]	Tyrosine-protein kinase JAK1 GN=jak1 OS=Danio rerio (Zebrafish) PE=1 SV=1	--
cycg036823	0.00200944	-1.39956	DOWN	--	adapters, effectors and signal transducers	JAK1	unnamed protein product [Oncorhynchus mykiss]	Tyrosine-protein kinase JAK1 GN=jak1 OS=Danio rerio (Zebrafish) PE=1 SV=1	SH2 domain
cycg036824	0.004176	-1.38945	DOWN	--	adapters, effectors and signal transducers	JAK1	PREDICTED: tyrosine-protein kinase JAK1-like [Lepisosteus oculatus]	Tyrosine-protein kinase JAK1 GN=jak1 OS=Danio rerio (Zebrafish) PE=1 SV=1	Protein tyrosine kinase;; Protein kinase domain;; Protein tyrosine kinase;; Protein kinase domain
PB.2388	1.27e-10	-3.37982	DOWN	K04441	adapters, effectors and signal transducers	MAPK	unnamed protein product [Oncorhynchus mykiss]	Mitogen-activated protein kinase 14A GN=mapk14a OS=Danio rerio (Zebrafish) PE=1 SV=1	Protein kinase domain;; Protein tyrosine kinase;; Protein kinase domain;; Protein tyrosine kinase	Dopaminergic synapse
cycg007896	8.11e-07	-2.62558	DOWN	K04371	adapters, effectors and signal transducers	MAPK	PREDICTED: mitogen-activated protein kinase 4 isoform X1 [Danio rerio]	Mitogen-activated protein kinase 6 GN=MAPK6 OS=Gallus gallus (Chicken) PE=2 SV=1	Protein kinase domain;; Tetraspanin family
cycg009890	0.00118736	-1.89204	DOWN	K04371	adapters, effectors and signal transducers	MAPK	RecName: Full=Mitogen-activated protein kinase 14B; Short=MAP kinase 14B; Short=MAPK 14B; AltName: Full=Mitogen-activated protein kinase p38b; Short=MAP kinase p38b; Short=cp38b [Cyprinus carpio]	Mitogen-activated protein kinase 14B GN=mapk14b OS=Cyprinus carpio (Common carp) PE=1 SV=1	--
cycg007902	1.78e-05	-1.75646	DOWN	K04371	adapters, effectors and signal transducers	MAPK	PREDICTED: mitogen-activated protein kinase 4 isoform X1 [Danio rerio]	Mitogen-activated protein kinase 6 GN=MAPK6 OS=Gallus gallus (Chicken) PE=2 SV=1	Tetraspanin family;; Protein kinase domain
cycg009891	4.8e-05	-1.6799	DOWN	K04371	adapters, effectors and signal transducers	MAPK	RecName: Full=Mitogen-activated protein kinase 14B; Short=MAP kinase 14B; Short=MAPK 14B; AltName: Full=Mitogen-activated protein kinase p38b; Short=MAP kinase p38b; Short=cp38b [Cyprinus carpio]	Mitogen-activated protein kinase 14B GN=mapk14b OS=Cyprinus carpio (Common carp) PE=1 SV=1	Protein kinase domain;; Protein tyrosine kinase;; Lipopolysaccharide kinase (Kdo/WaaP) family
cycg002749	0.00281759	-1.14813	DOWN	K04368	adapters, effectors and signal transducers	MAPK	dual specificity mitogen-activated protein kinase kinase 2 [Danio rerio]	Dual specificity mitogen-activated protein kinase kinase 2 GN=map2k2 OS=Cyprinus carpio (Common carp) PE=2 SV=1	Protein kinase domain;; Protein tyrosine kinase
cycg045089	0.0346212	-1.09309	DOWN	K04371	adapters, effectors and signal transducers	MAPK	mitogen-activated protein kinase 11 [Danio rerio]	Mitogen-activated protein kinase 14 GN=mapk14 OS=Xenopus laevis (African clawed frog) PE=2 SV=1	Protein kinase domain;; Protein tyrosine kinase;; Lipopolysaccharide kinase (Kdo/WaaP) family
cycg010898	4.64e-07	-2.7752	DOWN	K08850	adapters, effectors and signal transducers	MAPKKK	PREDICTED: mitogen-activated protein kinase kinase kinase 8 [Danio rerio]	Aurora kinase A-A GN=aurka-a OS=Xenopus laevis (African clawed frog) PE=1 SV=1	Protein kinase domain
cycg010897	9.73e-14	-2.56109	DOWN	--	adapters, effectors and signal transducers	MAPKKK	PREDICTED: mitogen-activated protein kinase kinase kinase 8 [Danio rerio]	Serine/threonine-protein kinase 4 18kDa subunit GN=stk4 OS=Xenopus laevis (African clawed frog) PE=2 SV=1	Protein kinase domain;; Protein tyrosine kinase
cycg014433	0.000307754	-1.50545	DOWN	--	adapters, effectors and signal transducers	MAPKKK	PREDICTED: mitogen-activated protein kinase kinase kinase MLT [Danio rerio]	--	SAM domain (Sterile alpha motif);; SAM domain (Sterile alpha motif)
cycg014431	0.0024744	-1.40235	DOWN	--	adapters, effectors and signal transducers	MAPKKK	unnamed protein product [Oncorhynchus mykiss]	Mitogen-activated protein kinase kinase kinase 13-B GN=map3k13-b OS=Xenopus laevis (African clawed frog) PE=2 SV=1	Protein tyrosine kinase;; Protein kinase domain
cycg045071	5.99e-10	-5.4003	DOWN	--	adapters, effectors and signal transducers	NALP12	PREDICTED: NACHT, LRR and PYD domains-containing protein 12-like [Danio rerio]	--	PAAD/DAPIN/Pyrin domain
PB.6849	8.61e-06	-1.6719	DOWN	--	adapters, effectors and signal transducers	NALP12	PREDICTED: NACHT, LRR and PYD domains-containing protein 12-like [Danio rerio]	Protein NLRC5 GN=nlrc5 OS=Ictalurus punctatus (Channel catfish) PE=2 SV=1	Leucine Rich repeat;; Fish-specific NACHT associated domain;; NACHT domain;; Leucine Rich repeats (2 copies);; Leucine rich repeat;; Leucine Rich Repeat;; Leucine rich repeat
cycg003197	0.00241885	-2.19881	DOWN	--	adapters, effectors and signal transducers	NALP3	PREDICTED: NACHT, LRR and PYD domains-containing protein 3-like [Danio rerio]	--	PAAD/DAPIN/Pyrin domain;; NACHT domain
cycg043624	0.0399816	-1.33393	DOWN	--	adapters, effectors and signal transducers	NALP3	PREDICTED: NACHT, LRR and PYD domains-containing protein 3 isoform X5 [Danio rerio]	Protein NLRC5 GN=nlrc5 OS=Ictalurus punctatus (Channel catfish) PE=2 SV=1	NACHT domain;; Fish-specific NACHT associated domain;; Leucine Rich repeat;; Leucine Rich repeats (2 copies);; Leucine Rich Repeat
cycg041190	8e-07	-4.24264	DOWN	--	adapters, effectors and signal transducers	NLRC3	PREDICTED: protein NLRC3 [Danio rerio]	Protein NLRC5 GN=nlrc5 OS=Ictalurus punctatus (Channel catfish) PE=2 SV=1	Fish-specific NACHT associated domain;; NACHT domain;; Retrotransposon hot spot protein
cycg017903	0.00257995	-3.32742	DOWN	--	adapters, effectors and signal transducers	NLRC3	PREDICTED: protein NLRC3 isoform X12 [Danio rerio]	Protein NLRC5 GN=nlrc5 OS=Ictalurus punctatus (Channel catfish) PE=2 SV=1	Fish-specific NACHT associated domain;; NACHT domain
cycg025067	0.003401	-3.15749	DOWN	--	adapters, effectors and signal transducers	NLRC3	PREDICTED: protein NLRC3-like, partial [Danio rerio]	--	--
cycg038199	0.00242015	-2.19069	DOWN	--	adapters, effectors and signal transducers	NLRC3	PREDICTED: protein NLRC3-like [Danio rerio]	Stonustoxin subunit beta OS=Synanceia horrida (Estuarine stonefish) PE=1 SV=3	SPRY-associated domain;; NACHT domain;; SPRY domain;; Leucine Rich repeat;; Leucine Rich Repeat
cycg031127	0.00117015	-1.9946	DOWN	--	adapters, effectors and signal transducers	NLRC3	PREDICTED: protein NLRC3-like, partial [Danio rerio]	--	IDEAL domain
cycg036683	0.00767809	-1.70517	DOWN	--	adapters, effectors and signal transducers	NLRC3	PREDICTED: protein NLRC3 isoform X12 [Danio rerio]	Protein NLRC5 GN=nlrc5 OS=Ictalurus punctatus (Channel catfish) PE=2 SV=1	NACHT domain;; Fish-specific NACHT associated domain
cycg027015	0.0193727	-1.69434	DOWN	--	adapters, effectors and signal transducers	NLRC3	PREDICTED: protein NLRC3 [Danio rerio]	Protein NLRC5 GN=nlrc5 OS=Ictalurus punctatus (Channel catfish) PE=2 SV=1	NACHT domain;; Fish-specific NACHT associated domain
cycg038988	0.000321691	-1.69044	DOWN	--	adapters, effectors and signal transducers	NLRC3	PREDICTED: protein NLRC3-like, partial [Danio rerio]	--	Fish-specific NACHT associated domain;; Leucine Rich repeat;; Leucine Rich Repeat
cycg024828	0.0258039	-1.67779	DOWN	--	adapters, effectors and signal transducers	NLRC3	PREDICTED: protein NLRC3-like [Danio rerio]	Protein NLRC5 GN=nlrc5 OS=Ictalurus punctatus (Channel catfish) PE=2 SV=1	NACHT domain
cycg044835	0.0116131	-1.64964	DOWN	--	adapters, effectors and signal transducers	NLRC3	PREDICTED: protein NLRC3-like [Danio rerio]	Protein NLRC5 GN=nlrc5 OS=Ictalurus punctatus (Channel catfish) PE=2 SV=1	Fish-specific NACHT associated domain;; NACHT domain
cycg028005	0.0105912	-1.60025	DOWN	--	adapters, effectors and signal transducers	NLRC3	PREDICTED: protein NLRC3-like [Danio rerio]	--	Fish-specific NACHT associated domain
cycg025698	0.022788	-1.27157	DOWN	--	adapters, effectors and signal transducers	NLRC3	PREDICTED: protein NLRC3-like [Danio rerio]	--	Fish-specific NACHT associated domain;; NACHT domain
cycg021860	0.0330805	-1.14642	DOWN	--	adapters, effectors and signal transducers	NLRC3	PREDICTED: protein NLRC3 isoform X12 [Danio rerio]	--	--
cycg014452	0.00504168	-1.70304	DOWN	K13448	adapters, effectors and signal transducers	Programmed cell death protein	Programmed cell death protein 6 [Osmerus mordax]	Peflin GN=pef1 OS=Xenopus laevis (African clawed frog) PE=1 SV=1	EF hand;; EF-hand domain pair;; EF-hand domain;; EF-hand domain pair;; EF hand;; EF hand
cycg023510	7.16e-05	-1.38593	DOWN	K13448	adapters, effectors and signal transducers	Programmed cell death protein	programmed cell death protein 6 [Danio rerio]	Peflin GN=pef1 OS=Xenopus laevis (African clawed frog) PE=1 SV=1	EF hand;; EF-hand domain pair;; EF-hand domain;; EF-hand domain pair;; EF hand
PB.5504	0.013728	-1.02948	DOWN	K18269	adapters, effectors and signal transducers	Programmed cell death protein	PREDICTED: programmed cell death protein 10 [Astyanax mexicanus]	Programmed cell death protein 10-A GN=pdcd10a OS=Danio rerio (Zebrafish) PE=1 SV=2	Protein of unknown function (DUF1241)
cycg002851	0.000734009	-1.71286	DOWN	--	adapters, effectors and signal transducers	SOCS1	suppressor of cytokine signaling 1 [Ctenopharyngodon idella]	Cytokine-inducible SH2-containing protein GN=CISH OS=Gallus gallus (Chicken) PE=2 SV=1	SH2 domain;; SOCS box
cycg000365	0.00184717	-1.71027	DOWN	--	adapters, effectors and signal transducers	SOCS1	suppressor of cytokine signaling 1b [Danio rerio]	Cytokine-inducible SH2-containing protein GN=CISH OS=Gallus gallus (Chicken) PE=2 SV=1	SOCS box
cycg034758	0.000693483	-1.60119	DOWN	--	adapters, effectors and signal transducers	SOCS1	suppressor of cytokine signaling 1b [Danio rerio]	Cytokine-inducible SH2-containing protein GN=CISH OS=Gallus gallus (Chicken) PE=2 SV=1	SOCS box;; SH2 domain
PB.6184	0.000957944	-2.0673	DOWN	K04696	adapters, effectors and signal transducers	SOCS3	suppressor of cytokine signaling 3b [Danio rerio]	Suppressor of cytokine signaling 3 GN=SOCS3 OS=Gallus gallus (Chicken) PE=2 SV=1	SH2 domain;; SOCS box
cycg020764	0.00527634	-1.83858	DOWN	--	adapters, effectors and signal transducers	SOCS3	suppressor of cytokine signaling 3b [Danio rerio]	Suppressor of cytokine signaling 3 GN=SOCS3 OS=Gallus gallus (Chicken) PE=2 SV=1	SH2 domain
cycg038158	0.000591696	-1.63166	DOWN	--	adapters, effectors and signal transducers	SOCS3	suppressor of cytokine signalling 3 [Ctenopharyngodon idella]	Suppressor of cytokine signaling 3 GN=SOCS3 OS=Gallus gallus (Chicken) PE=2 SV=1	SH2 domain;; SOCS box
cycg010043	2.84e-06	-1.73988	DOWN	--	adapters, effectors and signal transducers	SOCS7	suppressor of cytokine signaling 7 [Danio rerio]	Cytokine-inducible SH2-containing protein GN=CISH OS=Gallus gallus (Chicken) PE=2 SV=1	SOCS box;; SH2 domain
cycg021835	2.13e-07	-1.36962	DOWN	--	adapters, effectors and signal transducers	STAT3	PREDICTED: signal transducer and activator of transcription 3 isoform X4 [Danio rerio]	Signal transducer and activator of transcription 3 GN=STAT3 OS=Gallus gallus (Chicken) PE=1 SV=2	STAT protein, DNA binding domain;; STAT protein, all-alpha domain;; STAT protein, protein interaction domain;; SH2 domain
cycg001625	0.00022619	-2.28988	DOWN	K06689	adapters, effectors and signal transducers	UBE	ubiquitin-conjugating enzyme E2 L3 [Danio rerio]	Ubiquitin-conjugating enzyme E2 D2 GN=ube2d2 OS=Xenopus laevis (African clawed frog) PE=1 SV=1	Ubiquitin-conjugating enzyme;; Prokaryotic E2 family B;; RWD domain
cycg005119	7.1e-05	-1.71942	DOWN	K06689	adapters, effectors and signal transducers	UBE	PREDICTED: ubiquitin-conjugating enzyme E2 L3 isoform X1 [Danio rerio]	Ubiquitin-conjugating enzyme E2 D2 GN=ube2d2 OS=Xenopus laevis (African clawed frog) PE=1 SV=1	Ubiquitin-conjugating enzyme;; Prokaryotic E2 family B;; RWD domain;; UEV domain
cycg008353	1.9e-05	-1.64431	DOWN	K10573	adapters, effectors and signal transducers	UBE	PREDICTED: LOW QUALITY PROTEIN: ubiquitin-conjugating enzyme E2 A [Cynoglossus semilaevis]	Ubiquitin-conjugating enzyme E2 D4 {ECO:0000250|UniProtKB:Q9Y2X8} GN=ube2d4 OS=Xenopus laevis (African clawed frog) PE=1 SV=1	Ubiquitin-conjugating enzyme;; Prokaryotic E2 family B
cycg022307	0.00253728	-1.57063	DOWN	K13960	adapters, effectors and signal transducers	UBE	ubiquitin-conjugating enzyme E2 T [Danio rerio]	Ubiquitin-conjugating enzyme E2 T GN=ube2t OS=Danio rerio (Zebrafish) PE=2 SV=1	Ubiquitin-conjugating enzyme
cycg010639	0.00106621	-1.51876	DOWN	K06689	adapters, effectors and signal transducers	UBE	ubiquitin-conjugating enzyme E2 D1 [Danio rerio]	Ubiquitin-conjugating enzyme E2 D4 {ECO:0000250|UniProtKB:Q9Y2X8} GN=ube2d4 OS=Xenopus laevis (African clawed frog) PE=1 SV=1	Ubiquitin-conjugating enzyme
cycg028602	0.00444928	-1.42697	DOWN	K04554	adapters, effectors and signal transducers	UBE	ubiquitin-conjugating enzyme E2 J2 [Danio rerio]	Ubiquitin-conjugating enzyme E2 Z GN=ube2z OS=Xenopus laevis (African clawed frog) PE=2 SV=2	Ubiquitin-conjugating enzyme
cycg008350	0.00622467	-1.20483	DOWN	K10589	adapters, effectors and signal transducers	UBE	PREDICTED: ubiquitin-protein ligase E3C isoform X1 [Danio rerio]	Ubiquitin-protein ligase E3B GN=ube3b OS=Xenopus tropicalis (Western clawed frog) PE=2 SV=1	HECT-domain (ubiquitin-transferase)
cycg024909	0.00124143	-1.1444	DOWN	K10580	adapters, effectors and signal transducers	UBE	ubiquitin-conjugating enzyme E2 N [Danio rerio]	Ubiquitin-conjugating enzyme E2 T GN=ube2t OS=Xenopus laevis (African clawed frog) PE=2 SV=1	Ubiquitin-conjugating enzyme
cycg048896	0.005644	-1.11299	DOWN	K10589	adapters, effectors and signal transducers	UBE	PREDICTED: ubiquitin-protein ligase E3C isoform X1 [Danio rerio]	Ubiquitin-protein ligase E3B GN=ube3b OS=Xenopus tropicalis (Western clawed frog) PE=2 SV=1	HECT-domain (ubiquitin-transferase)
cycg004459	0.00339308	-1.07775	DOWN	K06689	adapters, effectors and signal transducers	UBE	PREDICTED: ubiquitin-conjugating enzyme E2 L3 isoform X1 [Danio rerio]	Ubiquitin-conjugating enzyme E2 D2 GN=ube2d2 OS=Xenopus laevis (African clawed frog) PE=1 SV=1	Ubiquitin-conjugating enzyme;; Prokaryotic E2 family B;; RWD domain;; UEV domain
cycg015444	0.0265646	-1.06594	DOWN	K10583	adapters, effectors and signal transducers	UBE	ubiquitin-conjugating enzyme E2 S [Danio rerio]	Ubiquitin-conjugating enzyme E2 S GN=ube2s OS=Danio rerio (Zebrafish) PE=2 SV=1	Ubiquitin-conjugating enzyme
cycg041650	0.00540428	-1.06129	DOWN	K00016	adapters, effectors and signal transducers	UBE	ubiquitin-conjugating enzyme E2 variant 3 [Danio rerio]	Ubiquitin-conjugating enzyme E2 variant 3 GN=uevld OS=Danio rerio (Zebrafish) PE=2 SV=1	UEV domain;; lactate/malate dehydrogenase, NAD binding domain;; lactate/malate dehydrogenase, alpha/beta C-terminal domain
cycg006635	0.0167609	-1.01443	DOWN	K10589	adapters, effectors and signal transducers	UBE	PREDICTED: ubiquitin-protein ligase E3C isoform X1 [Danio rerio]	Ubiquitin-protein ligase E3B GN=ube3b OS=Xenopus tropicalis (Western clawed frog) PE=2 SV=1	HECT-domain (ubiquitin-transferase)
cycg046436	8.22e-06	-2.11009	DOWN	K02219	antigen processing and regulators	CDK	cyclin-dependent kinases regulatory subunit 1 [Danio rerio]	Cyclin-dependent kinases regulatory subunit 2 GN=cks2 OS=Xenopus laevis (African clawed frog) PE=3 SV=1	Cyclin-dependent kinase regulatory subunit
cycg030956	0.0036623	-1.50735	DOWN	--	antigen processing and regulators	CDK	cyclin-dependent kinase 2-associated protein 2 [Danio rerio]	--	Cyclin-dependent kinase 2-associated protein
cycg003810	0.0486504	-1.34236	DOWN	K02206	antigen processing and regulators	CDK	RecName: Full=Cyclin-dependent kinase 1; Short=CDK1; AltName: Full=Cell division control protein 2 homolog; AltName: Full=Cell division protein kinase 1; AltName: Full=p34 protein kinase [Carassius auratus]	Cyclin-dependent kinase 1 GN=cdk1 OS=Carassius auratus (Goldfish) PE=2 SV=1	Protein kinase domain;; Protein tyrosine kinase
cycg022515	0.0154237	-1.08542	DOWN	K02206	antigen processing and regulators	CDK	RecName: Full=Cyclin-dependent kinase 2; AltName: Full=Cell division protein kinase 2 [Carassius auratus]	Cyclin-dependent kinase 2 GN=cdk2 OS=Carassius auratus (Goldfish) PE=2 SV=1	Protein kinase domain;; Protein tyrosine kinase
cycg030960	4.55e-06	-1.82184	DOWN	--	antigen processing and regulators	CDK related	cyclin-dependent kinase 2-associated protein 2 [Danio rerio]	--	Cyclin-dependent kinase 2-associated protein
cycg041084	0.0407562	-1.53707	DOWN	K02219	antigen processing and regulators	CDK related	PREDICTED: cyclin-dependent kinases regulatory subunit 2-like [Astyanax mexicanus]	Cyclin-dependent kinases regulatory subunit 2 GN=cks2 OS=Xenopus laevis (African clawed frog) PE=3 SV=1	Cyclin-dependent kinase regulatory subunit
cycg051454	0.034738	-1.32757	DOWN	K02219	antigen processing and regulators	CDK related	PREDICTED: cyclin-dependent kinases regulatory subunit 2-like [Astyanax mexicanus]	Cyclin-dependent kinases regulatory subunit 2 GN=cks2 OS=Xenopus laevis (African clawed frog) PE=3 SV=1	Cyclin-dependent kinase regulatory subunit
cycg031903	0.00264581	-2.43211	DOWN	--	antigen processing and regulators	CDKIs	cyclin-dependent kinase inhibitor 1 [Danio rerio]	--	Cyclin-dependent kinase inhibitor;; Cyclin-dependent kinase inhibitor
cycg008349	0.0310862	-2.00192	DOWN	--	antigen processing and regulators	CDKIs	cyclin-dependent kinase inhibitor 1 [Danio rerio]	--	Cyclin-dependent kinase inhibitor
cycg018286	0.017304	-1.26176	DOWN	--	antigen processing and regulators	CDKIs	cyclin-dependent kinase inhibitor 3 [Danio rerio]	--	Cyclin-dependent kinase inhibitor 3 (CDKN3)
cycg001925	0.00936257	-1.10305	DOWN	--	antigen processing and regulators	CDKIs	cyclin-dependent kinase inhibitor 1b, like [Danio rerio]	--	Cyclin-dependent kinase inhibitor
cycg027209	0.00930066	-1.07328	DOWN	--	antigen processing and regulators	HA	minor histocompatibility antigen H13 [Danio rerio]	--	--
PB.5351	1.31e-24	-4.94149	DOWN	--	antigen processing and regulators	MHC II	PREDICTED: major histocompatibility complex class II DBB isoform X1 [Danio rerio]	Class II histocompatibility antigen, B-L beta chain (Fragment) OS=Gallus gallus (Chicken) PE=3 SV=1	Immunoglobulin C1-set domain;; Class II histocompatibility antigen, beta domain;; CD80-like C2-set immunoglobulin domain
cycg007654	2.66e-05	-2.11619	DOWN	--	antigen processing and regulators	MHC II	PREDICTED: H-2 class II histocompatibility antigen, A-U alpha chain [Danio rerio]	Class II histocompatibility antigen, B-L beta chain (Fragment) OS=Gallus gallus (Chicken) PE=3 SV=1	Immunoglobulin C1-set domain;; Class II histocompatibility antigen, alpha domain;; Immunoglobulin domain;; CD80-like C2-set immunoglobulin domain
cycg037069	0.0254189	-1.64635	DOWN	--	antigen processing and regulators	MHC II	PREDICTED: major histocompatibility complex class I-related gene protein-like isoform X2 [Danio rerio]	Class II histocompatibility antigen, B-L beta chain (Fragment) OS=Gallus gallus (Chicken) PE=3 SV=1	--
cycg034429	0.0462516	-1.22593	DOWN	--	antigen processing and regulators	MHC II	PREDICTED: fibulin-7 isoform X1 [Danio rerio]	Class II histocompatibility antigen, B-L beta chain (Fragment) OS=Gallus gallus (Chicken) PE=3 SV=1	Immunoglobulin C1-set domain;; EGF-like domain;; Coagulation Factor Xa inhibitory site;; Complement Clr-like EGF-like;; Sushi domain (SCR repeat);; Calcium-binding EGF domain
cycg029208	1.56e-07	-1.89203	DOWN	--	antigen processing and regulators	TGFB	RecName: Full=Transforming growth factor beta-1; Short=TGF-beta-1; Flags: Precursor [Cyprinus carpio]	Transforming growth factor beta-1 (Precursor) GN=tgfb1 OS=Cyprinus carpio (Common carp) PE=2 SV=1	TGF-beta propeptide;; Transforming growth factor beta like domain
cycg045358	0.00266016	-1.45962	DOWN	--	antigen processing and regulators	TGFB	Transforming growth factor, beta-induced [Danio rerio]	--	Fasciclin domain;; Fasciclin domain
cycg049737	6.98e-10	-4.80447	DOWN	--	antigen processing and regulators	TNF	putative Tumour necrosis factor alpha two [Cyprinus carpio]	Tumor necrosis factor GN=tnf OS=Sparus aurata (Gilthead sea bream) PE=3 SV=1	TNF(Tumour Necrosis Factor) family
cycg003721	0.00346404	-2.8249	DOWN	--	antigen processing and regulators	TNF	PREDICTED: uncharacterized protein LOC100535208 [Danio rerio]	--	TNF(Tumour Necrosis Factor) family
cycg019520	3.04e-13	-2.32758	DOWN	--	antigen processing and regulators	TNF	Tumor necrosis factor-3 alpha [Cyprinus carpio]	Tumor necrosis factor GN=tnf OS=Sparus aurata (Gilthead sea bream) PE=3 SV=1	TNF(Tumour Necrosis Factor) family
cycg044745	1.49e-05	-2.30671	DOWN	--	antigen processing and regulators	TNFAIP3-interacting protein	PREDICTED: TNFAIP3-interacting protein 1-like [Danio rerio]	Mediator of RNA polymerase II transcription subunit 15 GN=med15 OS=Xenopus laevis (African clawed frog) PE=1 SV=1	--
PB.4170	0.00104829	-1.37047	DOWN	--	antigen processing and regulators	TNFAIP3-interacting protein	PREDICTED: TNFAIP3-interacting protein 2 [Danio rerio]	--	TSG101 and ALIX binding domain of CEP55
cycg012751	0.000171135	-1.22153	DOWN	--	antigen processing and regulators	TNFAIP3-interacting protein	PREDICTED: TNFAIP3-interacting protein 1-like [Danio rerio]	Mediator of RNA polymerase II transcription subunit 15 GN=med15 OS=Xenopus laevis (African clawed frog) PE=1 SV=1	--
cycg000551	2.1e-05	-1.97851	DOWN	--	antigen processing and regulators	TNFAIP3-interacting protein	PREDICTED: TNFAIP3-interacting protein 2 [Danio rerio]	Myosin heavy chain, fast skeletal muscle OS=Cyprinus carpio (Common carp) PE=2 SV=2	TSG101 and ALIX binding domain of CEP55
cycg033439	1.31e-24	-6.91083	DOWN	K06530	complement system	C3	complement C3-S [Cyprinus carpio]	Complement C3c alpha&apos; chain fragment 2 (Fragment) GN=c3 OS=Oncorhynchus mykiss (Rainbow trout) PE=1 SV=1	Alpha-2-macroglobulin family;; Alpha-2-macroglobulin family N-terminal region;; Anaphylotoxin-like domain;; Ligand-binding domain of nuclear hormone receptor;; MG2 domain
cycg010449	3.08e-11	-4.17426	DOWN	K06530	complement system	C3	complement C3-S [Cyprinus carpio]	Complement C3c alpha&apos; chain fragment 2 (Fragment) GN=c3 OS=Oncorhynchus mykiss (Rainbow trout) PE=1 SV=1	A-macroglobulin complement component;; UNC-6/NTR/C345C module;; A-macroglobulin receptor;; Alpha-macro-globulin thiol-ester bond-forming region;; Prenyltransferase-like;; Prenyltransferase-like
cycg021177	0.00832601	-1.50006	DOWN	K06530	complement system	C3	PREDICTED: component c3b, tandem duplicate 2 isoform X2 [Danio rerio]	Complement C3c alpha&apos; chain fragment 2 (Fragment) GN=c3 OS=Oncorhynchus mykiss (Rainbow trout) PE=1 SV=1	A-macroglobulin complement component;; A-macroglobulin receptor;; MG2 domain;; Alpha-2-macroglobulin family;; Alpha-2-macroglobulin family N-terminal region;; Alpha-macro-globulin thiol-ester bond-forming region;; Gryzun, putative trafficking through Golgi;; Trafficking protein particle complex subunit 10, TRAPPC10
cycg052199	4.95e-09	-3.07764	DOWN	--	complement system	C3aR	chemokine-like receptor 1 [Danio rerio]	C3a anaphylatoxin chemotactic receptor GN=c3ar1 OS=Oncorhynchus mykiss (Rainbow trout) PE=2 SV=1	7 transmembrane receptor (rhodopsin family);; Serpentine type 7TM GPCR chemoreceptor Srsx
cycg039524	4.83e-14	-2.17608	DOWN	--	complement system	C3aR	chemokine-like receptor 1 [Danio rerio]	C3a anaphylatoxin chemotactic receptor GN=c3ar1 OS=Oncorhynchus mykiss (Rainbow trout) PE=2 SV=1	7 transmembrane receptor (rhodopsin family);; Serpentine type 7TM GPCR chemoreceptor Srsx
cycg015051	4.44e-05	-1.74479	DOWN	--	complement system	C3aR	PREDICTED: chemokine-like receptor 1 [Danio rerio]	C3a anaphylatoxin chemotactic receptor GN=c3ar1 OS=Danio rerio (Zebrafish) PE=3 SV=1	7 transmembrane receptor (rhodopsin family);; Olfactory receptor
cycg014036	0.0198001	-1.39302	DOWN	--	complement system	C4	complement C4-2 [Cyprinus carpio]	Complement C3 gamma chain (Precursor; Fragment) GN=C3 OS=Lampetra japonica (Japanese lamprey) PE=2 SV=1	A-macroglobulin complement component;; Cytochrome P450;; Fibrinogen beta and gamma chains, C-terminal globular domain;; Fibronectin type III domain;; Alpha-2-macroglobulin family;; A-macroglobulin receptor;; UNC-6/NTR/C345C module;; Alpha-2-macroglobulin family N-terminal region;; MG2 domain;; Anaphylotoxin-like domain;; Alpha-macro-globulin thiol-ester bond-forming region;; Prenyltransferase-lik…
cycg020729	6.73e-07	-3.90321	DOWN	--	complement system	C7	complement component C7-1, partial [Hypophthalmichthys molitrix]	Complement component C9 (Precursor) GN=c9 OS=Takifugu rubripes (Japanese pufferfish) PE=3 SV=1	Low-density lipoprotein receptor domain class A
cycg008062	0.0047578	-1.25299	DOWN	--	complement system	C7	PREDICTED: complement component C7 isoform X2 [Danio rerio]	Complement component C8 beta chain (Precursor) GN=c8b OS=Paralichthys olivaceus (Bastard halibut) PE=2 SV=1	MAC/Perforin domain;; Sushi domain (SCR repeat);; Low-density lipoprotein receptor domain class A
cycg029602	5.99e-07	-4.87492	DOWN	--	complement system	CD59	PREDICTED: CD59 glycoprotein-like [Danio rerio]	Cytotoxin 8 (Precursor) OS=Naja atra (Chinese cobra) PE=3 SV=1	u-PAR/Ly-6 domain
cycg029603	0.0213977	-2.69913	DOWN	--	complement system	CD59	PREDICTED: CD59 glycoprotein-like [Danio rerio]	Cytotoxin 8 (Precursor) OS=Naja atra (Chinese cobra) PE=3 SV=1	u-PAR/Ly-6 domain
cycg040874	0.0288977	-1.59381	DOWN	--	inflammatory cytokines and receptors	ACRs	PREDICTED: atypical chemokine receptor 4 [Danio rerio]	C-X-C chemokine receptor type 4 {ECO:0000250|UniProtKB:P61073, ECO:0000312|EMBL:CAL49334.1} OS=Xenopus tropicalis (Western clawed frog) PE=2 SV=1	7 transmembrane receptor (rhodopsin family);; Serpentine type 7TM GPCR chemoreceptor Srsx
PB.7147	6.62e-38	-3.86134	DOWN	--	inflammatory cytokines and receptors	CCL	chemokine CCL-C5a-like protein [Cyprinus carpio]	--	Small cytokines (intecrine/chemokine), interleukin-8 like
PB.3086	0.000321943	-2.22598	DOWN	K13072	inflammatory cytokines and receptors	CCL	PREDICTED: C-C motif chemokine 25-like [Poecilia reticulata]	--	Small cytokines (intecrine/chemokine), interleukin-8 like
cycg011471	6.09e-13	-2.3647	DOWN	--	inflammatory cytokines and receptors	CCR	PREDICTED: C-C chemokine receptor type 5-like [Danio rerio]	Type-1 angiotensin II receptor B GN=agtr1-b OS=Xenopus laevis (African clawed frog) PE=2 SV=1	7 transmembrane receptor (rhodopsin family);; 7 transmembrane receptor (rhodopsin family)
cycg039113	0.000364007	-1.30536	DOWN	--	inflammatory cytokines and receptors	CD11	CD11-1 [Cyprinus carpio]	Integrin alpha-4 (Precursor) GN=itga4 OS=Xenopus laevis (African clawed frog) PE=2 SV=1	Integrin alpha;; FG-GAP repeat;; Repeat domain in Vibrio, Colwellia, Bradyrhizobium and Shewanella;; von Willebrand factor type A domain;; von Willebrand factor type A domain;; von Willebrand factor type A domain;; von Willebrand factor type A domain;; von Willebrand factor type A domain;; Zinc-finger double domain;; Zinc finger, C2H2 type
cycg027940	0.000237236	-1.94964	DOWN	--	inflammatory cytokines and receptors	CFLAR	PREDICTED: CASP8 and FADD-like apoptosis regulator-like [Lepisosteus oculatus]	Caspase-2 subunit p12 (Precursor) GN=CASP2 OS=Gallus gallus (Chicken) PE=2 SV=2	Death effector domain;; Caspase domain
cycg000117	2.17e-13	-3.6897	DOWN	--	inflammatory cytokines and receptors	CXCL	CXC chemokine a protein [Cyprinus carpio]	Interleukin-8 (Precursor) GN=CXCL8 OS=Gallus gallus (Chicken) PE=2 SV=1	Small cytokines (intecrine/chemokine), interleukin-8 like
cycg024367	1.46e-07	-3.39161	DOWN	--	inflammatory cytokines and receptors	CXCL	chemokine (C-X-C motif) ligand 18b precursor [Danio rerio]	--	Small cytokines (intecrine/chemokine), interleukin-8 like
cycg049280	2.55e-05	-3.336	DOWN	--	inflammatory cytokines and receptors	CXCL	PREDICTED: C-X-C motif chemokine 11 [Danio rerio]	Interleukin-8 (Precursor) GN=CXCL8 OS=Gallus gallus (Chicken) PE=2 SV=1	Small cytokines (intecrine/chemokine), interleukin-8 like
PB.1747	4.7e-07	-3.11131	DOWN	--	inflammatory cytokines and receptors	CXCL	CXC chemokine [Cyprinus carpio]	--	Small cytokines (intecrine/chemokine), interleukin-8 like
cycg037173	2.28e-07	-3.08604	DOWN	--	inflammatory cytokines and receptors	CXCL	CXC chemokine CXCb2 [Cyprinus carpio]	Interleukin-8 (Precursor) GN=CXCL8 OS=Gallus gallus (Chicken) PE=2 SV=1	Small cytokines (intecrine/chemokine), interleukin-8 like
cycg037174	8.07e-08	-2.81575	DOWN	--	inflammatory cytokines and receptors	CXCL	PREDICTED: C-X-C motif chemokine 11-like [Danio rerio]	Interleukin-8 (Precursor) GN=CXCL8 OS=Gallus gallus (Chicken) PE=2 SV=1	Small cytokines (intecrine/chemokine), interleukin-8 like
cycg015477	6.9e-08	-3.12986	DOWN	--	inflammatory cytokines and receptors	CXCR	PREDICTED: si:dkey-269d20.3 isoform X1 [Danio rerio]	C-X-C chemokine receptor type 4-B GN=cxcr4-b OS=Xenopus laevis (African clawed frog) PE=2 SV=1	7 transmembrane receptor (rhodopsin family);; Serpentine type 7TM GPCR chemoreceptor Srw
cycg013494	2.57e-09	-2.37011	DOWN	--	inflammatory cytokines and receptors	CXCR	PREDICTED: si:dkey-269d20.3 isoform X1 [Danio rerio]	C-X-C chemokine receptor type 4-B GN=cxcr4-b OS=Xenopus laevis (African clawed frog) PE=2 SV=1	7 transmembrane receptor (rhodopsin family)
cycg028192	4.33e-06	-2.2775	DOWN	--	inflammatory cytokines and receptors	CXCR	Cxcr4A [Danio rerio]	C-X-C chemokine receptor type 4-B GN=cxcr4-b OS=Xenopus laevis (African clawed frog) PE=2 SV=1	7 transmembrane receptor (rhodopsin family)
cycg013495	0.00014325	-1.91947	DOWN	--	inflammatory cytokines and receptors	CXCR	CXCR3 chemokine receptor [Cyprinus carpio]	C-X-C chemokine receptor type 4-B GN=cxcr4-b OS=Xenopus laevis (African clawed frog) PE=2 SV=1	7 transmembrane receptor (rhodopsin family)
cycg009049	0.00379318	-1.4525	DOWN	--	inflammatory cytokines and receptors	CXCR	CXCR4 [Cyprinus carpio]	C-X-C chemokine receptor type 4-B GN=cxcr4-b OS=Xenopus laevis (African clawed frog) PE=2 SV=1	7 transmembrane receptor (rhodopsin family)
cycg049974	0.00409968	-1.36693	DOWN	--	inflammatory cytokines and receptors	CXCR	CXCR4 [Cyprinus carpio]	C-X-C chemokine receptor type 4-B GN=cxcr4-b OS=Xenopus laevis (African clawed frog) PE=2 SV=1	7 transmembrane receptor (rhodopsin family)
cycg002318	2.3e-05	-1.84947	DOWN	--	inflammatory cytokines and receptors	cytokine receptor	cytokine receptor family member b6 precursor [Danio rerio]	--	Interferon-alpha/beta receptor, fibronectin type III;; Tissue factor;; Fibronectin type III domain
cycg018405	0.00163995	-1.13434	DOWN	--	inflammatory cytokines and receptors	FAM	hypothetical protein FLJ23790 [Danio rerio]	Protein FAM91A1 GN=fam91a1 OS=Danio rerio (Zebrafish) PE=2 SV=2	FAM91 C-terminus;; FAM91 N-terminus;; Lecithin retinol acyltransferase;; Calcium-binding EGF domain
cycg017072	0.000840011	-2.97072	DOWN	--	inflammatory cytokines and receptors	FGF	PREDICTED: fibroblast growth factor 7 isoform X1 [Danio rerio]	Fibroblast growth factor 3 (Precursor) GN=FGF3 OS=Gallus gallus (Chicken) PE=2 SV=1	Fibroblast growth factor
cycg039238	5.58e-05	-3.61921	DOWN	--	inflammatory cytokines and receptors	GVIN	PREDICTED: interferon-induced very large GTPase 1-like [Danio rerio]	--	Dynamin family
cycg010744	0.0172073	-1.98316	DOWN	--	inflammatory cytokines and receptors	GVIN	PREDICTED: interferon-induced very large GTPase 1-like [Danio rerio]	--	Dynamin family;; Root hair defective 3 GTP-binding protein (RHD3);; AIG1 family
cycg015126	0.0476149	-1.72394	DOWN	--	inflammatory cytokines and receptors	HB-EGF	PREDICTED: proheparin-binding EGF-like growth factor isoform X1 [Danio rerio]	Heparin-binding EGF-like growth factor (Precursor) GN=HBEGF OS=Gallus gallus (Chicken) PE=1 SV=1	Human growth factor-like EGF
PB.3334	4.73e-11	-2.66065	DOWN	--	inflammatory cytokines and receptors	IL-1	interleukin-1 family member A [Danio rerio]	--	Interleukin-1 / 18
cycg049285	1.44e-28	-8.00868	DOWN	--	inflammatory cytokines and receptors	IL-1	interleukin 1 beta 2-1 [Cyprinus carpio]	Interleukin-1 beta (Precursor) GN=il1b OS=Oncorhynchus mykiss (Rainbow trout) PE=2 SV=1	Interleukin-1 / 18;; Interleukin-1 propeptide
cycg049284	2.2e-27	-7.12314	DOWN	--	inflammatory cytokines and receptors	IL-1	interleukin 1 beta 2-1 [Cyprinus carpio]	Interleukin-1 beta (Precursor) GN=il1b OS=Oncorhynchus mykiss (Rainbow trout) PE=2 SV=1	Interleukin-1 / 18;; Interleukin-1 propeptide
cycg049297	9.31e-20	-5.70529	DOWN	--	inflammatory cytokines and receptors	IL-1	interleukin-1 beta [Cyprinus carpio]	Interleukin-1 beta (Precursor) GN=il1b OS=Oncorhynchus mykiss (Rainbow trout) PE=2 SV=1	Interleukin-1 / 18;; Interleukin-1 propeptide
cycg014517	0.000276487	-3.05034	DOWN	--	inflammatory cytokines and receptors	IL-12	interleukin-12 p40b subunit [Cyprinus carpio]	--	--
cycg002501	0.00831437	-1.51653	DOWN	--	inflammatory cytokines and receptors	IL12R	TPA: interleukin 12 receptor beta 2.b [Danio rerio]	--	Fibronectin type III domain
cycg038803	0.000293077	-1.25409	DOWN	--	inflammatory cytokines and receptors	IL12R	TPA: interleukin 12 receptor beta 2.b [Danio rerio]	Protein sidekick-1 (Precursor) GN=SDK1 OS=Gallus gallus (Chicken) PE=2 SV=1	Fibronectin type III domain
cycg010656	1.11e-17	-5.23585	DOWN	--	inflammatory cytokines and receptors	IL1R	interleukin-1 receptor 2 [Ctenopharyngodon idella]	Interleukin-1 receptor accessory protein-like 1-A (Precursor) GN=il1rapl1a OS=Danio rerio (Zebrafish) PE=2 SV=1	Immunoglobulin domain;; Immunoglobulin domain
cycg029742	3.21e-12	-5.15516	DOWN	--	inflammatory cytokines and receptors	IL1R	interleukin-1 receptor 2 [Ctenopharyngodon idella]	--	Immunoglobulin domain;; Immunoglobulin domain
cycg020580	0.00178228	-2.97474	DOWN	--	inflammatory cytokines and receptors	IL1R related	PREDICTED: interleukin-1 receptor accessory protein-like isoform X1 [Danio rerio]	--	--
cycg044676	1.77e-06	-2.46478	DOWN	--	inflammatory cytokines and receptors	IL1R related	PREDICTED: interleukin-1 receptor accessory protein-like isoform X2 [Danio rerio]	Interleukin-1 receptor accessory protein-like 1-B (Precursor) GN=il1rapl1b OS=Danio rerio (Zebrafish) PE=1 SV=1	TIR domain;; TIR domain
cycg044675	0.000221603	-1.85166	DOWN	--	inflammatory cytokines and receptors	IL1R related	PREDICTED: interleukin-1 receptor accessory protein-like, partial [Danio rerio]	Interleukin-1 receptor accessory protein-like 1-A (Precursor) GN=il1rapl1a OS=Danio rerio (Zebrafish) PE=2 SV=1	Immunoglobulin domain;; Immunoglobulin I-set domain;; Immunoglobulin V-set domain
cycg045018	0.00214576	-1.31009	DOWN	K13430	inflammatory cytokines and receptors	IL1R related	PREDICTED: interleukin-1 receptor-associated kinase 3 [Danio rerio]	Aurora kinase A-B GN=aurka-b OS=Xenopus laevis (African clawed frog) PE=2 SV=3	Protein kinase domain;; Protein tyrosine kinase
cycg043032	9.63e-06	-2.10751	DOWN	--	inflammatory cytokines and receptors	IL2R	PREDICTED: interleukin-2 receptor subunit beta-like isoform X1 [Danio rerio]	--	--
cycg008969	7.53e-09	-4.10052	DOWN	--	inflammatory cytokines and receptors	IL-6	IL-6 subfamily-like cytokine M17 [Cyprinus carpio]	--	Ciliary neurotrophic factor;; LIF / OSM family
cycg030295	0.0416919	-1.32018	DOWN	--	inflammatory cytokines and receptors	IL-6	interleukin-6a [Cyprinus carpio]	Interleukin-6 (Precursor) GN=il6 OS=Oncorhynchus mykiss (Rainbow trout) PE=2 SV=1	Interleukin-6/G-CSF/MGF family
cycg025553	0.0353486	-1.61756	DOWN	--	inflammatory cytokines and receptors	IL6R	PREDICTED: interleukin-6 receptor subunit beta isoform X1 [Danio rerio]	Receptor-type tyrosine-protein phosphatase F (Precursor) GN=ptprf OS=Danio rerio (Zebrafish) PE=2 SV=1	Fibronectin type III domain;; Interleukin-6 receptor alpha chain, binding
cycg009456	0.0253803	-1.21781	DOWN	--	inflammatory cytokines and receptors	IL6R	PREDICTED: interleukin-6 receptor subunit beta isoform X1 [Danio rerio]	Prolactin receptor (Precursor) GN=PRLR OS=Columba livia (Domestic pigeon) PE=2 SV=1	Fibronectin type III domain
PB.6098	2.66e-75	-6.98073	DOWN	--	inflammatory cytokines and receptors	IL-8	interleukin 8 [Cyprinus carpio]	Interleukin-8 (Precursor) GN=CXCL8 OS=Gallus gallus (Chicken) PE=2 SV=1	Small cytokines (intecrine/chemokine), interleukin-8 like
cycg045634	2.37e-05	-4.35267	DOWN	--	inflammatory cytokines and receptors	IL-8	interleukin 8 [Cyprinus carpio]	Interleukin-8 (Precursor) GN=CXCL8 OS=Gallus gallus (Chicken) PE=2 SV=1	Small cytokines (intecrine/chemokine), interleukin-8 like
cycg010293	0.000312261	-2.57883	DOWN	--	inflammatory cytokines and receptors	IL-8	uncharacterized protein LOC100003859 precursor [Danio rerio]	Interleukin-8 (Precursor) GN=CXCL8 OS=Gallus gallus (Chicken) PE=2 SV=1	Small cytokines (intecrine/chemokine), interleukin-8 like
cycg025213	0.0263439	-2.09691	DOWN	--	inflammatory cytokines and receptors	integrin alpha	PREDICTED: integrin alpha-2 [Danio rerio]	Integrin alpha-6 light chain (Precursor) GN=ITGA6 OS=Gallus gallus (Chicken) PE=2 SV=1	Integrin alpha
cycg014734	0.0101279	-1.08335	DOWN	--	inflammatory cytokines and receptors	integrin alpha	PREDICTED: integrin alpha-M-like, partial [Astyanax mexicanus]	--	Integrin alpha
cycg002224	0.00111947	-1.90393	DOWN	--	inflammatory cytokines and receptors	integrin beta	Integrin beta 3a [Danio rerio]	Integrin beta-1 (Precursor) GN=ITGB1 OS=Gallus gallus (Chicken) PE=1 SV=1	Integrin, beta chain;; Integrin, beta chain
cycg049747	0.00507239	-1.41331	DOWN	--	inflammatory cytokines and receptors	integrin beta	PREDICTED: integrin beta-7 [Danio rerio]	Integrin beta-1-B (Precursor) GN=itgb1-b OS=Xenopus laevis (African clawed frog) PE=2 SV=1	Integrin, beta chain;; Integrin beta cytoplasmic domain
cycg027425	1.94e-05	-1.30099	DOWN	--	inflammatory cytokines and receptors	IRF1	interferon regulatory factor 1 [Danio rerio]	Interferon regulatory factor 1 GN=IRF1 OS=Gallus gallus (Chicken) PE=2 SV=1	Interferon regulatory factor transcription factor
cycg035229	1.61e-05	-2.30946	DOWN	--	inflammatory cytokines and receptors	IRF8	interferon regulatory factor 8 [Danio rerio]	Interferon regulatory factor 8 GN=IRF8 OS=Gallus gallus (Chicken) PE=2 SV=1	Interferon regulatory factor transcription factor;; Interferon-regulatory factor 3
cycg022719	2.93e-06	-1.88466	DOWN	--	inflammatory cytokines and receptors	IRF8	interferon regulatory factor 8 [Danio rerio]	Interferon regulatory factor 8 GN=IRF8 OS=Gallus gallus (Chicken) PE=2 SV=1	Interferon-regulatory factor 3
cycg001020	0.00283973	-2.15466	DOWN	--	inflammatory cytokines and receptors	NFIL3	interleukin 3 regulated nuclear factor [Ctenopharyngodon idella]	Nuclear factor interleukin-3-regulated protein GN=nfil3 OS=Danio rerio (Zebrafish) PE=2 SV=1	Basic region leucine zipper;; bZIP transcription factor
cycg001021	4.36e-08	-2.12503	DOWN	--	inflammatory cytokines and receptors	NFIL3	interleukin 3 regulated nuclear factor [Ctenopharyngodon idella]	Nuclear factor interleukin-3-regulated protein GN=nfil3 OS=Danio rerio (Zebrafish) PE=2 SV=1	Vertebrate interleukin-3 regulated transcription factor
cycg001035	0.0194559	-1.29442	DOWN	--	inflammatory cytokines and receptors	NFIL3	interleukin 3 regulated nuclear factor [Ctenopharyngodon idella]	Nuclear factor interleukin-3-regulated protein GN=nfil3 OS=Danio rerio (Zebrafish) PE=2 SV=1	Vertebrate interleukin-3 regulated transcription factor;; Basic region leucine zipper;; bZIP transcription factor;; bZIP Maf transcription factor
cycg012743	2.77e-06	-1.71799	DOWN	K07253	innate immune cells related	MIF	MIF [Cyprinus carpio]	Macrophage migration inhibitory factor GN=MIF OS=Gallus gallus (Chicken) PE=3 SV=3	Macrophage migration inhibitory factor (MIF);; Tautomerase enzyme
cycg032651	1.46e-07	-1.55587	DOWN	--	innate immune cells related	NCF	neutrophil cytosolic factor 2 [Cyprinus carpio]	Intersectin-1 GN=itsn1 OS=Xenopus laevis (African clawed frog) PE=1 SV=1	SH3 domain;; Variant SH3 domain;; Variant SH3 domain;; TPR repeat;; Tetratricopeptide repeat;; Tetratricopeptide repeat;; Tetratricopeptide repeat;; Tetratricopeptide repeat;; Tetratricopeptide repeat
cycg039124	0.0044842	-1.40463	DOWN	--	innate immune cells related	NCK and related	nck-associated protein 1-like [Danio rerio]	Nck-associated protein 1 GN=nckap1 OS=Xenopus laevis (African clawed frog) PE=2 SV=1	Membrane-associated apoptosis protein
cycg027087	1.27e-06	-1.37476	DOWN	K05750	innate immune cells related	NCK and related	nck-associated protein 1-like [Danio rerio]	Nck-associated protein 1 GN=nckap1 OS=Xenopus laevis (African clawed frog) PE=2 SV=1	Membrane-associated apoptosis protein;; Membrane-associated apoptosis protein
cycg003664	5.16e-12	-3.63288	DOWN	K12347	innate immune cells related	NRAMP	natural resistance associated macrophage protein [Danio rerio]	Natural resistance-associated macrophage protein 1 GN=SLC11A1 OS=Gallus gallus (Chicken) PE=2 SV=1	Natural resistance-associated macrophage protein
cycg003665	4.29e-12	-3.53296	DOWN	K12347	innate immune cells related	NRAMP	putative natural resistance-associated macrophage protein [Cyprinus carpio]	Natural resistance-associated macrophage protein 1 GN=SLC11A1 OS=Gallus gallus (Chicken) PE=2 SV=1	--
cycg010434	1.2e-09	-3.30639	DOWN	--	innate immune cells related	NRAMP	natural resistance-associated macrophage protein [Megalobrama amblycephala]	--	--
cycg031058	0.0032934	-2.51977	DOWN	K02183	other genes related to immune response	ACTININ	Actn3a [Danio rerio]	Alpha-actinin-2 GN=ACTN2 OS=Gallus gallus (Chicken) PE=2 SV=1	Spectrin repeat;; Ca2+ insensitive EF hand;; EF hand;; EF-hand domain;; EF-hand domain pair;; Calponin homology (CH) domain;; CAMSAP CH domain
cycg017656	6.78e-31	-8.15231	DOWN	K12396	other genes related to immune response	AP-3	AP-3 complex subunit delta-1 [Danio rerio]	--	Adaptin N terminal region;; Bovine leukaemia virus receptor (BLVR)
cycg000360	9.63e-05	-1.70369	DOWN	K12398	other genes related to immune response	AP-3	AP-3 complex subunit mu-2 [Danio rerio]	AP-3 complex subunit mu-1 GN=AP3M1 OS=Gallus gallus (Chicken) PE=2 SV=1	Adaptor complexes medium subunit family;; Clathrin adaptor complex small chain
cycg034716	0.00793005	-1.48539	DOWN	--	other genes related to immune response	AP-3	PREDICTED: AP-3 complex subunit sigma-2-like, partial [Astyanax mexicanus]	--	--
cycg037120	0.000351668	-1.24293	DOWN	--	other genes related to immune response	CARD	RecName: Full=Apoptosis-associated speck-like protein containing a CARD; AltName: Full=PYD and CARD domain-containing protein [Danio rerio]	Apoptosis-associated speck-like protein containing a CARD GN=pycard OS=Danio rerio (Zebrafish) PE=1 SV=1	Caspase recruitment domain;; PAAD/DAPIN/Pyrin domain
PB.6930	0.00225517	-1.23478	DOWN	K12799	other genes related to immune response	CARD	RecName: Full=Apoptosis-associated speck-like protein containing a CARD; AltName: Full=PYD and CARD domain-containing protein [Danio rerio]	Apoptosis-associated speck-like protein containing a CARD GN=pycard OS=Danio rerio (Zebrafish) PE=1 SV=1	Caspase recruitment domain;; PAAD/DAPIN/Pyrin domain
cycg050156	0.000706615	-2.74786	DOWN	--	other genes related to immune response	caspase	caspase 3, apoptosis-related cysteine peptidase b [Danio rerio]	Caspase-3 subunit p12 (Precursor) GN=casp3 OS=Xenopus laevis (African clawed frog) PE=2 SV=1	Caspase domain
cycg016214	3.58e-19	-3.9162	DOWN	--	other genes related to immune response	cathepsin	cathepsin L.1 precursor [Danio rerio]	Cathepsin L1 light chain (Fragments) GN=CTSL OS=Gallus gallus (Chicken) PE=1 SV=1	Papain family cysteine protease;; Cathepsin propeptide inhibitor domain (I29)
cycg004946	1.59e-12	-2.98341	DOWN	--	other genes related to immune response	cathepsin	uncharacterized protein LOC553749 [Danio rerio]	Cathepsin K (Precursor) GN=CTSK OS=Gallus gallus (Chicken) PE=2 SV=1	Ankyrin repeat;; Ankyrin repeats (3 copies);; Ankyrin repeats (many copies);; Ankyrin repeat;; Ankyrin repeats (many copies);; Papain family cysteine protease
cycg029998	2.81e-19	-2.68101	DOWN	--	other genes related to immune response	cathepsin	cathepsin K [Cyprinus carpio &apos;color&apos;]	Cathepsin K (Precursor) GN=CTSK OS=Gallus gallus (Chicken) PE=2 SV=1	Papain family cysteine protease;; Cathepsin propeptide inhibitor domain (I29);; Immunoglobulin V-set domain;; Peptidase C1-like family
cycg016213	8.01e-07	-2.53189	DOWN	--	other genes related to immune response	cathepsin	cathepsin L.1 precursor [Danio rerio]	Cathepsin L1 light chain (Fragments) GN=CTSL OS=Gallus gallus (Chicken) PE=1 SV=1	Papain family cysteine protease;; Cathepsin propeptide inhibitor domain (I29);; Peptidase C1-like family
cycg025039	1.69e-12	-2.26174	DOWN	--	other genes related to immune response	cathepsin	cysteine proteinase [Cyprinus carpio]	Cathepsin K (Precursor) GN=CTSK OS=Gallus gallus (Chicken) PE=2 SV=1	Papain family cysteine protease;; Cathepsin propeptide inhibitor domain (I29);; Peptidase C1-like family
cycg050845	2.77e-06	-2.08049	DOWN	K01363	other genes related to immune response	cathepsin	cathepsin B preproprotein [Cyprinus carpio]	Cathepsin B heavy chain (Precursor) GN=CTSB OS=Gallus gallus (Chicken) PE=2 SV=1	Papain family cysteine protease;; Peptidase family C1 propeptide
cycg015174	0.00010176	-1.97741	DOWN	--	other genes related to immune response	cathepsin	cathepsin D [Ctenopharyngodon idella]	Cathepsin D (Precursor) GN=ctsd OS=Clupea harengus (Atlantic herring) PE=1 SV=1	Eukaryotic aspartyl protease;; A1 Propeptide;; Xylanase inhibitor N-terminal;; Eukaryotic aspartyl protease;; Xylanase inhibitor C-terminal
cycg030857	3.94e-06	-1.6974	DOWN	--	other genes related to immune response	cathepsin	cathepsin K [Cyprinus carpio &apos;color&apos;]	Cathepsin K (Precursor) GN=CTSK OS=Gallus gallus (Chicken) PE=2 SV=1	Papain family cysteine protease;; Cathepsin propeptide inhibitor domain (I29);; Peptidase C1-like family
cycg015588	3.19e-06	-1.44408	DOWN	K01366	other genes related to immune response	cathepsin	uncharacterized protein LOC550326 precursor [Danio rerio]	Cathepsin L1 light chain (Fragments) GN=CTSL OS=Gallus gallus (Chicken) PE=1 SV=1	Papain family cysteine protease
cycg050851	0.000460697	-1.34307	DOWN	K01363	other genes related to immune response	cathepsin	cathepsin B preproprotein [Cyprinus carpio]	Cathepsin B heavy chain (Precursor) GN=CTSB OS=Gallus gallus (Chicken) PE=2 SV=1	Papain family cysteine protease;; Peptidase family C1 propeptide
cycg038165	6.19e-14	-2.63538	DOWN	--	other genes related to immune response	CEBP	CCAAT/enhancer binding protein beta [Danio rerio]	CCAAT/enhancer-binding protein beta GN=CEBPB OS=Gallus gallus (Chicken) PE=1 SV=1	Basic region leucine zipper
cycg006653	0.00385327	-2.25952	DOWN	--	other genes related to immune response	CEBP	CCAAT/enhancer-binding protein alpha [Danio rerio]	CCAAT/enhancer-binding protein beta GN=CEBPB OS=Gallus gallus (Chicken) PE=1 SV=1	Basic region leucine zipper
PB.3882	1.32e-12	-2.25358	DOWN	K10048	other genes related to immune response	CEBP	CCAAT/enhancer binding protein beta [Danio rerio]	CCAAT/enhancer-binding protein beta GN=CEBPB OS=Gallus gallus (Chicken) PE=1 SV=1	Basic region leucine zipper
cycg006648	0.0205587	-1.46374	DOWN	--	other genes related to immune response	CEBP	CCAAT/enhancer-binding protein alpha [Danio rerio]	CCAAT/enhancer-binding protein beta GN=CEBPB OS=Gallus gallus (Chicken) PE=1 SV=1	Basic region leucine zipper;; bZIP transcription factor
cycg006647	0.0357248	-1.12777	DOWN	--	other genes related to immune response	CEBP	CCAAT/enhancer-binding protein gamma [Danio rerio]	CCAAT/enhancer-binding protein beta GN=CEBPB OS=Gallus gallus (Chicken) PE=1 SV=1	Basic region leucine zipper;; bZIP transcription factor
PB.711	4.2e-07	-4.26455	DOWN	--	other genes related to immune response	hepcidin	hepcidin antimicrobial peptide [Cyprinus carpio]	Hepcidin-1 (Precursor) GN=hamp1 OS=Danio rerio (Zebrafish) PE=3 SV=1	Hepcidin
cycg003402	0.000988265	-1.2005	DOWN	K09487	other genes related to immune response	HSP	heat shock protein [Ctenopharyngodon idella]	Endoplasmin (Precursor) GN=HSP90B1 OS=Gallus gallus (Chicken) PE=1 SV=1	Hsp90 protein
cycg047533	0.015753	-1.2028	DOWN	K09489	other genes related to immune response	HSP4	heat shock protein 4a [Danio rerio]	Heat shock 70 kDa protein OS=Xenopus laevis (African clawed frog) PE=2 SV=1	Hsp70 protein
cycg026410	0.000525497	-1.52307	DOWN	K09490	other genes related to immune response	HSP5	Heat shock protein 5 [Danio rerio]	78 kDa glucose-regulated protein (Precursor) GN=hspa5 OS=Xenopus laevis (African clawed frog) PE=2 SV=1	Hsp70 protein;; NAD-specific glutamate dehydrogenase
cycg030029	2.97e-11	-4.17867	DOWN	K03283	other genes related to immune response	HSP70	heat shock protein 70 [Clarias batrachus]	Heat shock 70 kDa protein 1 OS=Oryzias latipes (Medaka fish) PE=3 SV=1	Hsp70 protein
cycg002729	0.00402945	-2.72678	DOWN	K03283	other genes related to immune response	HSP70	heat shock protein Hsp70 [Schizothorax prenanti]	Heat shock 70 kDa protein GN=hsp70 OS=Oncorhynchus tshawytscha (Chinook salmon) PE=2 SV=1	Hsp70 protein
cycg002727	0.00295827	-2.62814	DOWN	K03283	other genes related to immune response	HSP70	heat shock protein Hsp70 [Schizothorax prenanti]	Heat shock 70 kDa protein GN=hsp70 OS=Oncorhynchus tshawytscha (Chinook salmon) PE=2 SV=1	Hsp70 protein
cycg009262	0.000228156	-1.24428	DOWN	K03283	other genes related to immune response	HSP70	heat shock protein 70 [Hypophthalmichthys molitrix]	Heat shock cognate 71 kDa protein GN=hspa8 OS=Danio rerio (Zebrafish) PE=2 SV=1	Hsp70 protein;; CD80-like C2-set immunoglobulin domain
cycg027178	0.0342479	-1.57295	DOWN	K04079	other genes related to immune response	HSP90	unnamed protein product [Tetraodon nigroviridis]	Heat shock protein HSP 90-alpha GN=HSP90AA1 OS=Gallus gallus (Chicken) PE=3 SV=3	Hsp90 protein
cycg017908	0.0332829	-1.06295	DOWN	K04079	other genes related to immune response	HSP90	heat shock protein 90 beta [Megalobrama amblycephala]	Heat shock protein HSP 90-beta GN=hsp90ab1 OS=Danio rerio (Zebrafish) PE=1 SV=2	Hsp90 protein
cycg047148	0.0217776	-1.02512	DOWN	--	other genes related to immune response	Kruppel-like factor	Kruppel-like factor 12 [Danio rerio]	Wilms tumor protein homolog (Fragment) GN=WT1 OS=Alligator mississippiensis (American alligator) PE=2 SV=1	Zinc finger, C2H2 type;; Zinc-finger double domain;; C2H2-type zinc finger
cycg050658	1.11e-05	-4.40684	DOWN	--	other genes related to immune response	lymphocyte antigen	PREDICTED: lymphocyte antigen 6F-like [Danio rerio]	Lymphocyte antigen 6E (Precursor) GN=LY6E OS=Gallus gallus (Chicken) PE=2 SV=1	u-PAR/Ly-6 domain
PB.6506	0.0266655	-1.79396	DOWN	--	other genes related to immune response	lymphocyte antigen	PREDICTED: lymphocyte antigen 86 isoform X2 [Danio rerio]	Lymphocyte antigen 86 (Precursor) GN=LY86 OS=Gallus gallus (Chicken) PE=1 SV=1	--
PB.5502	5.38e-05	-1.16904	DOWN	K07369	other genes related to immune response	MALT1	PREDICTED: mucosa-associated lymphoid tissue lymphoma translocation protein 1 isoform X1 [Danio rerio]	Vascular endothelial growth factor receptor 3 (Precursor) GN=FLT4 OS=Coturnix coturnix (Common quail) PE=2 SV=1	Caspase domain;; Immunoglobulin domain;; Immunoglobulin domain;; Immunoglobulin I-set domain;; Immunoglobulin V-set domain;; Immunoglobulin domain
cycg036901	0.0130748	-1.53419	DOWN	--	other genes related to immune response	mucin	PREDICTED: mucin-2-like, partial [Oreochromis niloticus]	E3 ubiquitin-protein ligase RNF12-B GN=rnf12-b OS=Xenopus laevis (African clawed frog) PE=2 SV=1	--
cycg021807	0.0033661	-1.27788	DOWN	--	other genes related to immune response	myeloid cell related	PREDICTED: myeloid-associated differentiation marker homolog [Danio rerio]	Myeloid-associated differentiation marker homolog GN=myadm OS=Xenopus tropicalis (Western clawed frog) PE=2 SV=1	Membrane-associating domain;; Membrane-associating domain
cycg008057	0.00381237	-1.49349	DOWN	--	other genes related to immune response	PAXILLIN	PREDICTED: paxillin isoform X1 [Cynoglossus semilaevis]	Paxillin GN=PXN OS=Gallus gallus (Chicken) PE=1 SV=1	Paxillin family;; LIM domain
cycg029181	3.01e-05	-1.35397	DOWN	K09579	other genes related to immune response	PIN1	peptidyl-prolyl cis-trans isomerase NIMA-interacting 4 [Danio rerio]	Peptidyl-prolyl cis-trans isomerase NIMA-interacting 4 GN=pin4 OS=Danio rerio (Zebrafish) PE=2 SV=1	PPIC-type PPIASE domain;; PPIC-type PPIASE domain
cycg029181	3.01e-05	-1.35397	DOWN	K09579	other genes related to immune response	PIN1	peptidyl-prolyl cis-trans isomerase NIMA-interacting 4 [Danio rerio]	Peptidyl-prolyl cis-trans isomerase NIMA-interacting 4 GN=pin4 OS=Danio rerio (Zebrafish) PE=2 SV=1	PPIC-type PPIASE domain;; PPIC-type PPIASE domain
cycg018944	0.0437249	-1.91443	DOWN	--	other genes related to immune response	platelet related	PREDICTED: platelet-derived growth factor receptor beta-like [Takifugu rubripes]	--	--
cycg004315	1.14e-05	-1.73013	DOWN	--	other genes related to immune response	platelet related	PREDICTED: platelet-activating factor receptor [Danio rerio]	Lysophosphatidic acid receptor 6 GN=LPAR6 OS=Gallus gallus (Chicken) PE=1 SV=1	7 transmembrane receptor (rhodopsin family)
cycg005824	0.0313896	-1.18855	DOWN	--	other genes related to immune response	platelet related	PREDICTED: platelet endothelial cell adhesion molecule-like isoform X5 [Danio rerio]	Contactin-5 (Precursor) GN=cntn5 OS=Danio rerio (Zebrafish) PE=2 SV=1	Immunoglobulin domain;; Immunoglobulin domain;; Immunoglobulin I-set domain;; Immunoglobulin domain;; Immunoglobulin domain
cycg011375	0.00700699	-1.07735	DOWN	--	other genes related to immune response	platelet related	platelet receptor Gi24 precursor [Danio rerio]	--	Immunoglobulin V-set domain
cycg040074	0.000632321	-1.68827	DOWN	--	other genes related to immune response	TMED	transmembrane emp24 domain-containing protein 3 precursor [Danio rerio]	Transmembrane emp24 domain-containing protein 1 (Precursor) GN=tmed1 OS=Xenopus tropicalis (Western clawed frog) PE=2 SV=1	emp24/gp25L/p24 family/GOLD
cycg008544	0.04916	-1.05277	DOWN	--	other genes related to immune response	TMED	Tmed9 protein [Danio rerio]	Transmembrane emp24 domain-containing protein 10 (Precursor) GN=tmed10 OS=Takifugu rubripes (Japanese pufferfish) PE=3 SV=1	emp24/gp25L/p24 family/GOLD;; emp24/gp25L/p24 family/GOLD
cycg001634	0.00254882	-1.00003	DOWN	--	other genes related to immune response	TMED	PREDICTED: transmembrane emp24 domain-containing protein 2-like isoform X1 [Oreochromis niloticus]	Transmembrane emp24 domain-containing protein 1 (Precursor) GN=tmed1 OS=Xenopus tropicalis (Western clawed frog) PE=2 SV=1	emp24/gp25L/p24 family/GOLD
cycg051033	0.0469705	-1.78585	DOWN	--	other genes related to immune response	TRIM	PREDICTED: E3 ubiquitin-protein ligase TRIM11 [Danio rerio]	--	--
cycg034845	0.000200978	-3.8659	DOWN	--	other genes related to immune response	ubiquitin ligase	PREDICTED: E3 ubiquitin-protein ligase UBR5-like [Notothenia coriiceps]	--	HECT-domain (ubiquitin-transferase)
cycg024950	2.05e-22	-3.65433	DOWN	--	other genes related to immune response	ubiquitin ligase	PREDICTED: uncharacterized protein LOC101468782 [Maylandia zebra]	G2/M phase-specific E3 ubiquitin-protein ligase GN=G2E3 OS=Gallus gallus (Chicken) PE=2 SV=1	HECT-domain (ubiquitin-transferase)
cycg016392	0.00423676	-2.91944	DOWN	--	other genes related to immune response	ubiquitin ligase	E3 ubiquitin-protein ligase KCMF1 [Danio rerio]	E3 ubiquitin-protein ligase KCMF1 GN=kcmf1 OS=Danio rerio (Zebrafish) PE=2 SV=1	--
cycg018456	6.95e-09	-2.63947	DOWN	K11971	other genes related to immune response	ubiquitin ligase	E3 ubiquitin-protein ligase RNF19B [Danio rerio]	E3 ubiquitin-protein ligase RNF19B GN=rnf19b OS=Danio rerio (Zebrafish) PE=3 SV=2	IBR domain
cycg018461	5.08e-09	-2.2463	DOWN	K11971	other genes related to immune response	ubiquitin ligase	E3 ubiquitin-protein ligase RNF19B [Danio rerio]	E3 ubiquitin-protein ligase RNF19B GN=rnf19b OS=Danio rerio (Zebrafish) PE=3 SV=2	IBR domain
cycg024869	9.62e-05	-2.18267	DOWN	K16279	other genes related to immune response	ubiquitin ligase	PREDICTED: E3 ubiquitin-protein ligase RNF182-like [Danio rerio]	E3 ubiquitin-protein ligase RNF182 GN=rnf182 OS=Xenopus laevis (African clawed frog) PE=2 SV=1	Ring finger domain;; Zinc finger, C3HC4 type (RING finger)
cycg047370	0.0158117	-1.74402	DOWN	--	other genes related to immune response	ubiquitin ligase	PREDICTED: E3 ubiquitin-protein ligase TRIM11 [Danio rerio]	Nuclear factor 7, ovary OS=Xenopus laevis (African clawed frog) PE=2 SV=1	U-box domain;; Protein of unknown function (DUF1299);; SPRY-associated domain;; SPRY domain
cycg033825	6.63e-07	-1.71408	DOWN	--	other genes related to immune response	ubiquitin ligase	uncharacterized protein LOC406256 [Danio rerio]	E3 ubiquitin-protein ligase znrf1 GN=znrf1 OS=Xenopus laevis (African clawed frog) PE=2 SV=1	--
cycg031460	0.00311101	-1.51445	DOWN	K06058	other genes related to immune response	ubiquitin ligase	PREDICTED: E3 ubiquitin-protein ligase DTX3L-like isoform X2 [Larimichthys crocea]	E3 ubiquitin-protein ligase DTX1 GN=dtx1 OS=Xenopus laevis (African clawed frog) PE=2 SV=1	--
cycg039218	0.00142993	-1.49981	DOWN	--	other genes related to immune response	ubiquitin ligase	PREDICTED: RING finger protein 165 isoform X2 [Danio rerio]	E3 ubiquitin-protein ligase arkadia GN=rnf111 OS=Xenopus tropicalis (Western clawed frog) PE=2 SV=1	Ring finger domain;; Zinc finger, C3HC4 type (RING finger);; Zinc finger, C3HC4 type (RING finger);; zinc-RING finger domain;; RING-H2 zinc finger;; Zinc finger, C3HC4 type (RING finger);; PAP2 superfamily
cycg013689	0.00447029	-1.43373	DOWN	K10683	other genes related to immune response	ubiquitin ligase	G2e3 protein [Danio rerio]	G2/M phase-specific E3 ubiquitin-protein ligase GN=G2E3 OS=Gallus gallus (Chicken) PE=2 SV=1	PHD-like zinc-binding domain;; HECT-domain (ubiquitin-transferase)
cycg001819	1.24e-05	-1.38469	DOWN	--	other genes related to immune response	ubiquitin ligase	E3 ubiquitin-protein ligase TRAF7 [Danio rerio]	Beta-TrCP GN=fbxw1 OS=Xenopus laevis (African clawed frog) PE=2 SV=1	WD domain, G-beta repeat;; Zinc finger, C3HC4 type (RING finger);; Zinc finger, C3HC4 type (RING finger);; Nucleoporin Nup120/160
cycg013209	0.0320666	-1.32194	DOWN	K17592	other genes related to immune response	ubiquitin ligase	PREDICTED: E3 ubiquitin-protein ligase rififylin isoform X1 [Danio rerio]	Baculoviral IAP repeat-containing protein 7 GN=birc7 OS=Xenopus tropicalis (Western clawed frog) PE=2 SV=1	Zinc finger, C3HC4 type (RING finger)
cycg043448	0.0481425	-1.21744	DOWN	--	other genes related to immune response	ubiquitin ligase	PREDICTED: E3 ubiquitin-protein ligase pellino homolog 2-like, partial [Danio rerio]	Collagen alpha-1(II) chain (Precursor) GN=col2a1 OS=Xenopus tropicalis (Western clawed frog) PE=2 SV=1	Pellino
cycg051648	0.00603256	-1.15504	DOWN	K11982	other genes related to immune response	ubiquitin ligase	RecName: Full=E3 ubiquitin-protein ligase RNF181; AltName: Full=RING finger protein 181 [Danio rerio]	E3 ubiquitin-protein ligase RNF181 GN=rnf181 OS=Danio rerio (Zebrafish) PE=2 SV=2	Ring finger domain;; RING-H2 zinc finger;; Zinc finger, C3HC4 type (RING finger);; Zinc finger, C3HC4 type (RING finger);; zinc-RING finger domain;; Zinc finger, C3HC4 type (RING finger);; Anaphase-promoting complex subunit 11 RING-H2 finger
cycg033970	0.0164587	-1.14996	DOWN	--	other genes related to immune response	ubiquitin ligase	PREDICTED: abl interactor 1 isoform X2 [Danio rerio]	E3 ubiquitin-protein ligase SH3RF1 GN=sh3rf1 OS=Danio rerio (Zebrafish) PE=2 SV=2	Abl-interactor HHR;; SH3 domain;; Variant SH3 domain;; Variant SH3 domain
cycg028956	0.00505776	-1.02298	DOWN	K10587	other genes related to immune response	ubiquitin ligase	Ube3a protein [Danio rerio]	E3 ubiquitin-protein ligase SMURF2 GN=smurf2 OS=Xenopus laevis (African clawed frog) PE=2 SV=1	HECT-domain (ubiquitin-transferase)
cycg030392	0.00380698	-1.01873	DOWN	K11975	other genes related to immune response	ubiquitin ligase	PREDICTED: E3 ubiquitin-protein ligase RNF144B isoform X1 [Danio rerio]	Probable E3 ubiquitin-protein ligase RNF144A-B OS=Danio rerio (Zebrafish) PE=2 SV=1	IBR domain
cycg013498	5.55e-07	-1.7421	DOWN	K12164	other genes related to immune response	ubiquitin related	PREDICTED: ubiquitin-like modifier-activating enzyme 5 [Danio rerio]	Ubiquitin-like modifier-activating enzyme 5 GN=uba5 OS=Xenopus laevis (African clawed frog) PE=2 SV=1	ThiF family
cycg021813	5.1e-05	-1.56254	DOWN	K05610	other genes related to immune response	ubiquitin related	ubiquitin carboxyl-terminal hydrolase isozyme L5 [Danio rerio]	Ubiquitin carboxyl-terminal hydrolase BAP1 GN=bap1 OS=Xenopus tropicalis (Western clawed frog) PE=2 SV=1	Ubiquitin carboxyl-terminal hydrolase, family 1;; Glutaredoxin
cycg001540	0.000304671	-1.53466	DOWN	K11843	other genes related to immune response	ubiquitin related	ubiquitin carboxyl-terminal hydrolase 14 [Danio rerio]	Ubiquitin carboxyl-terminal hydrolase 33 GN=usp33 OS=Xenopus tropicalis (Western clawed frog) PE=2 SV=2	Ubiquitin carboxyl-terminal hydrolase;; Ubiquitin carboxyl-terminal hydrolase
cycg004728	4.02e-05	-1.53132	DOWN	K12165	other genes related to immune response	ubiquitin related	PREDICTED: ubiquitin-fold modifier-conjugating enzyme 1-like [Astyanax mexicanus]	Ubiquitin-fold modifier-conjugating enzyme 1 GN=ufc1 OS=Danio rerio (Zebrafish) PE=2 SV=1	Ubiquitin-fold modifier-conjugating enzyme 1
PB.5911	0.000123697	-1.37865	DOWN	K11843	other genes related to immune response	ubiquitin related	ubiquitin carboxyl-terminal hydrolase 14 [Danio rerio]	Ubiquitin carboxyl-terminal hydrolase 22 GN=usp22 OS=Danio rerio (Zebrafish) PE=2 SV=1	Ubiquitin carboxyl-terminal hydrolase;; Ubiquitin carboxyl-terminal hydrolase
cycg004270	0.00725039	-1.24904	DOWN	K12165	other genes related to immune response	ubiquitin related	PREDICTED: ubiquitin-fold modifier-conjugating enzyme 1-like [Astyanax mexicanus]	Ubiquitin-fold modifier-conjugating enzyme 1 GN=ufc1 OS=Danio rerio (Zebrafish) PE=2 SV=1	Ubiquitin-fold modifier-conjugating enzyme 1
cycg013747	0.00680123	-1.12583	DOWN	K11844	other genes related to immune response	ubiquitin related	ubiquitin carboxyl-terminal hydrolase 16 [Danio rerio]	Ubiquitin carboxyl-terminal hydrolase 16 {ECO:0000255|HAMAP-Rule:MF_03062} GN=usp16 OS=Danio rerio (Zebrafish) PE=3 SV=1	Ubiquitin carboxyl-terminal hydrolase;; Zn-finger in ubiquitin-hydrolases and other protein;; Ubiquitin carboxyl-terminal hydrolase
cycg027767	0.00658021	-1.12468	DOWN	--	other genes related to immune response	ubiquitin related	PREDICTED: ubiquitin-associated protein 1 isoform X1 [Danio rerio]	--	UBA/TS-N domain
cycg041218	0.00176392	-1.12074	DOWN	K05609	other genes related to immune response	ubiquitin related	ubiquitin carboxyl-terminal hydrolase isozyme L3 [Danio rerio]	Ubiquitin carboxyl-terminal hydrolase BAP1 GN=bap1 OS=Xenopus tropicalis (Western clawed frog) PE=2 SV=1	Ubiquitin carboxyl-terminal hydrolase, family 1
cycg019312	0.00259633	-1.11631	DOWN	K11835	other genes related to immune response	ubiquitin related	PREDICTED: ubiquitin carboxyl-terminal hydrolase 4 [Danio rerio]	Ubiquitin carboxyl-terminal hydrolase 15 GN=usp15 OS=Xenopus tropicalis (Western clawed frog) PE=2 SV=2	Ubiquitin carboxyl-terminal hydrolase;; Ubiquitin-like domain;; DUSP domain;; Ubiquitin-specific protease C-terminal;; Ubiquitin carboxyl-terminal hydrolase;; SecY translocase;; SecY translocase
cycg001854	0.0117347	-1.04681	DOWN	K05610	other genes related to immune response	ubiquitin related	ubiquitin carboxyl-terminal hydrolase isozyme L5 [Danio rerio]	Ubiquitin carboxyl-terminal hydrolase BAP1 GN=bap1 OS=Xenopus tropicalis (Western clawed frog) PE=2 SV=1	Ubiquitin carboxyl-terminal hydrolase, family 1
cycg013454	0.0422218	-1.04038	DOWN	--	other genes related to immune response	ubiquitin related	PREDICTED: ubiquitin carboxyl-terminal hydrolase 32 isoform X1 [Danio rerio]	Ubiquitin carboxyl-terminal hydrolase 15 GN=usp15 OS=Xenopus tropicalis (Western clawed frog) PE=2 SV=2	Ubiquitin carboxyl-terminal hydrolase;; DUSP domain;; Ubiquitin carboxyl-terminal hydrolase;; EF-hand domain pair;; EF-hand domain;; EF hand;; EF hand;; EF-hand domain pair
PB.2615	0.00362457	-2.05854	DOWN	--	other genes related to immune response	UBL	ubiquitin-like [Danio rerio]	--	Ubiquitin family;; Ubiquitin-2 like Rad60 SUMO-like;; DUF2407 ubiquitin-like domain
cycg033781	0.025226	-1.16237	DOWN	K08770	other genes related to immune response	UBL	ubiquitin-like protein 4A [Danio rerio]	Ubiquitin-like protein 4A GN=ubl4a OS=Danio rerio (Zebrafish) PE=2 SV=1	Ubiquitin family;; Ubiquitin-2 like Rad60 SUMO-like
cycg029235	0.000415823	-2.10056	DOWN	--	pattern recognition	CD209	PREDICTED: CD209 antigen-like protein A isoform X2 [Danio rerio]	Hepatic lectin OS=Gallus gallus (Chicken) PE=1 SV=1	Lectin C-type domain;; Ly49-like protein, N-terminal region;; Cell division protein FtsL;; N-terminal TM domain of oligopeptide transport permease C;; Protein of unknown function (DUF1218);; Alphaherpesvirus glycoprotein E;; Tapetum specific protein TAP35/TAP44
cycg042063	2.08e-06	-4.56515	DOWN	--	pattern recognition	C-type lectin	PREDICTED: C-type lectin domain family 4 member K-like [Danio rerio]	--	--
cycg028924	3.04e-12	-4.06777	DOWN	--	pattern recognition	C-type lectin	C-type lectin [Cyprinus carpio]	Galactose-specific lectin nattectin (Precursor) OS=Thalassophryne nattereri (Niquim) PE=1 SV=1	Lectin C-type domain
cycg027342	0.0267444	-1.93043	DOWN	--	pattern recognition	c-type lectin	C-type lectin, partial [Carassius auratus]	Hepatic lectin OS=Gallus gallus (Chicken) PE=1 SV=1	Lectin C-type domain
cycg036208	0.00123528	-1.9947	DOWN	--	pattern recognition	FBXL	Fbxl5 protein [Danio rerio]	F-box/LRR-repeat protein 5 GN=fbxl5 OS=Danio rerio (Zebrafish) PE=2 SV=2	Leucine Rich repeat;; Leucine Rich Repeat;; Leucine Rich repeats (2 copies);; Leucine rich repeat;; F-box-like;; F-box domain;; SPRY domain;; SPRY domain
cycg044505	0.000130389	-1.43591	DOWN	K03875	pattern recognition	FBXL	PREDICTED: S-phase kinase-associated protein 2 isoform X1 [Danio rerio]	F-box/LRR-repeat protein 7 GN=fbxl7 OS=Danio rerio (Zebrafish) PE=2 SV=1	--
cycg007027	2.17e-05	-3.21216	DOWN	--	pattern recognition	galectin	PREDICTED: galectin-1 isoform X1 [Danio rerio]	Beta-galactoside-binding lectin OS=Electrophorus electricus (Electric eel) PE=1 SV=1	Galactoside-binding lectin
cycg012271	0.000123273	-2.89285	DOWN	--	pattern recognition	galectin	PREDICTED: galectin-1 isoform X1 [Danio rerio]	Beta-galactoside-binding lectin OS=Electrophorus electricus (Electric eel) PE=1 SV=1	Galactoside-binding lectin
cycg012673	0.00188736	-2.46845	DOWN	--	pattern recognition	intelectin	intelectin [Carassius auratus]	Intelectin-like protein {ECO:0000305|PubMed:22085437} OS=Alligator mississippiensis (American alligator) PE=1 SV=1	Fibrinogen beta and gamma chains, C-terminal globular domain
cycg048351	0.000965769	-1.27864	DOWN	--	pattern recognition	LPS-anchor protein	PREDICTED: lipopolysaccharide-responsive and beige-like anchor protein isoform X5 [Danio rerio]	Neurobeachin (Fragment) GN=NBEA OS=Gallus gallus (Chicken) PE=2 SV=1	Concanavalin A-like lectin/glucanases superfamily
cycg028411	0.00676111	-1.20755	DOWN	--	pattern recognition	LPS-anchor protein	lipopolysaccharide-induced TNF factor [Ctenopharyngodon idella]	Lipopolysaccharide-induced tumor necrosis factor-alpha factor homolog GN=litaf OS=Danio rerio (Zebrafish) PE=2 SV=1	LITAF-like zinc ribbon domain
cycg009877	0.00506659	-2.244	DOWN	--	pattern recognition	LRR-containing proteins	PREDICTED: immunoglobulin superfamily containing leucine-rich repeat protein 2-like isoform X1 [Oreochromis niloticus]	--	--
cycg014971	0.00432189	-1.86584	DOWN	--	pattern recognition	LRR-containing proteins	PREDICTED: leucine-rich repeat flightless-interacting protein 2-like [Danio rerio]	Leucine-rich repeat flightless-interacting protein 2 {ECO:0000250|UniProtKB:Q6GNW0} OS=Xenopus tropicalis (Western clawed frog) PE=2 SV=1	--
cycg048526	0.00492748	-1.83228	DOWN	--	pattern recognition	LRR-containing proteins	PREDICTED: leucine-rich repeat flightless-interacting protein 2-like [Danio rerio]	Leucine-rich repeat flightless-interacting protein 2 {ECO:0000250|UniProtKB:Q6GNW0} OS=Xenopus tropicalis (Western clawed frog) PE=2 SV=1	Double stranded RNA binding protein (DUF2051)
cycg010973	0.0446222	-1.42785	DOWN	--	pattern recognition	LRR-containing proteins	PREDICTED: leucine-rich repeat-containing protein 20 isoform X3 [Danio rerio]	Protein scribble homolog GN=scrib OS=Danio rerio (Zebrafish) PE=1 SV=1	Leucine rich repeat;; Leucine Rich repeats (2 copies);; Leucine Rich Repeat;; Leucine Rich repeat;; Leucine rich repeat
cycg024097	0.000342813	-1.26272	DOWN	K03544	pattern recognition	LRR-containing proteins	leucine-rich repeat serine/threonine-protein kinase 2 [Danio rerio]	Malignant fibrous histiocytoma-amplified sequence 1 homolog GN=mfhas1 OS=Xenopus tropicalis (Western clawed frog) PE=2 SV=1	AAA domain (Cdc48 subfamily);; Leucine Rich repeats (2 copies);; Miro-like protein;; Leucine rich repeat;; Protein tyrosine kinase;; ATPase family associated with various cellular activities (AAA);; Protein kinase domain;; Ras family;; Leucine Rich Repeat;; AAA domain (dynein-related subfamily);; Sigma-54 interaction domain;; Magnesium chelatase, subunit ChlI
PB.1132	0.0213921	-1.21677	DOWN	--	pattern recognition	LRR-containing proteins	PREDICTED: ras suppressor protein 1 isoform X1 [Danio rerio]	Leucine-rich repeat protein SHOC-2 GN=shoc2 OS=Danio rerio (Zebrafish) PE=2 SV=1	Leucine Rich repeats (2 copies);; Leucine rich repeat;; Leucine Rich Repeat;; Leucine rich repeat;; Leucine Rich repeat
cycg006884	0.00326604	-1.07634	DOWN	--	pattern recognition	LRR-containing proteins	PREDICTED: putative leucine-rich repeat-containing protein DDB_G0290503 [Danio rerio]	Myosin-9 GN=MYH9 OS=Gallus gallus (Chicken) PE=2 SV=1	--
cycg001038	0.00247151	-1.43986	DOWN	--	pattern recognition	MPR	cation-independent mannose-6-phosphate receptor precursor [Danio rerio]	72 kDa type IV collagenase (Precursor) GN=MMP2 OS=Gallus gallus (Chicken) PE=1 SV=1	Cation-independent mannose-6-phosphate receptor repeat;; Fibronectin type II domain;; Cation-independent mannose-6-phosphate receptor repeat;; Autophagy-related protein 27
cycg015320	0.000120016	-1.20647	DOWN	--	pattern recognition	MPR	cation-dependent mannose-6-phosphate receptor precursor [Danio rerio]	--	Mannose-6-phosphate receptor
PB.5194	0.000162794	-1.14926	DOWN	K10089	pattern recognition	MPR	cation-dependent mannose-6-phosphate receptor precursor [Danio rerio]	--	Mannose-6-phosphate receptor;; Autophagy-related protein 27
cycg012757	0.0046185	-1.25956	DOWN	--	pattern recognition	TLR1	toll-like receptor 1 [Ctenopharyngodon idella]	Toll-like receptor 2 type-1 (Precursor) GN=TLR2-1 OS=Gallus gallus (Chicken) PE=2 SV=1	Leucine rich repeat;; Leucine Rich repeats (2 copies);; Leucine Rich Repeat
cycg030849	5.66e-13	-5.3954	DOWN	--	pattern recognition	TLR18	Toll-like receptor 18 [Danio rerio]	Toll-like receptor 2 type-1 (Precursor) GN=TLR2-1 OS=Gallus gallus (Chicken) PE=2 SV=1	TIR domain;; Leucine Rich repeats (2 copies);; Leucine rich repeat;; TIR domain;; Leucine Rich Repeat;; Leucine rich repeat;; Sema domain;; Plexin repeat
cycg017082	0.00542712	-1.89381	DOWN	--	pattern recognition	TLR22	toll-like receptor 22 [Cyprinus carpio]	Toll-like receptor 2 type-2 (Precursor) GN=TLR2-2 OS=Gallus gallus (Chicken) PE=2 SV=1	Leucine rich repeat;; Leucine Rich repeats (2 copies);; TIR domain;; Leucine rich repeats (6 copies);; Leucine Rich Repeat;; TIR domain;; Leucine-rich repeat;; Leucine Rich repeat;; Leucine rich repeat
PB.6999	4.21e-15	-3.76258	DOWN	K05398	pattern recognition	TLR25	TLR25 [Ictalurus punctatus]	Toll-like receptor 2 type-2 (Precursor) GN=TLR2-2 OS=Gallus gallus (Chicken) PE=2 SV=1	Leucine rich repeat;; Leucine Rich repeats (2 copies);; Leucine Rich Repeat;; Leucine Rich repeat;; Leucine rich repeat;; TIR domain;; TIR domain
cycg052035	0.00363484	-2.11366	DOWN	--	pattern recognition	TLR4	toll-like receptor 4b [Cyprinus carpio]	Toll-like receptor 2 type-2 (Precursor) GN=TLR2-2 OS=Gallus gallus (Chicken) PE=2 SV=1	Leucine rich repeat;; Leucine Rich repeats (2 copies);; TIR domain;; Leucine Rich Repeat;; TIR domain;; Leucine rich repeats (6 copies);; Leucine Rich repeat;; Leucine rich repeat
cycg019680	2.48e-05	-2.37628	DOWN	--	pattern recognition	TLR5	TLR5 [Cyprinus carpio]	Toll-like receptor 2 type-2 (Precursor) GN=TLR2-2 OS=Gallus gallus (Chicken) PE=2 SV=1	Leucine rich repeat;; Leucine Rich repeats (2 copies);; TIR domain;; Leucine Rich Repeat;; Leucine rich repeats (6 copies);; TIR domain;; Leucine rich repeat;; Leucine Rich repeats (2 copies);; TIR domain;; Leucine rich repeats (6 copies);; Leucine Rich Repeat;; TIR domain;; Leucine rich repeat;; Leucine Rich repeat
cycg042649	0.00600905	-1.45126	DOWN	--	T/B cell antigen activation	BAFF	BAFF [Carassius auratus]	--	TNF(Tumour Necrosis Factor) family
cycg008822	0.000457312	-1.40281	DOWN	--	T/B cell antigen activation	B-cell CLL/lymphoma	B-cell CLL/lymphoma 7 protein family member B-A [Danio rerio]	B-cell CLL/lymphoma 7 protein family member B-A GN=bcl7ba OS=Danio rerio (Zebrafish) PE=2 SV=1	BCL7, N-terminal conserver region
PB.1020	5.42e-08	-2.12329	DOWN	K09258	T/B cell antigen activation	BCL	PREDICTED: B-cell lymphoma 3 protein [Danio rerio]	--	--
cycg044963	9.6e-08	-1.87659	DOWN	--	T/B cell antigen activation	BCL	PREDICTED: B-cell lymphoma/leukemia 10 [Danio rerio]	--	Caspase recruitment domain
cycg027781	0.00014192	-1.63985	DOWN	--	T/B cell antigen activation	BLNK	B-cell linker protein [Danio rerio]	B-cell linker protein GN=BLNK OS=Gallus gallus (Chicken) PE=1 SV=1	SAM domain (Sterile alpha motif);; SAM domain (Sterile alpha motif)
cycg027780	0.000459348	-1.54441	DOWN	--	T/B cell antigen activation	BLNK	B-cell linker protein [Danio rerio]	B-cell linker protein GN=BLNK OS=Gallus gallus (Chicken) PE=1 SV=1	SH2 domain
cycg006686	2.34e-08	-2.55463	DOWN	--	T/B cell antigen activation	CD22	PREDICTED: B-cell receptor CD22-like isoform X1 [Danio rerio]	Schwann cell myelin protein (Precursor) GN=SMP OS=Coturnix coturnix japonica (Japanese quail) PE=1 SV=1	Immunoglobulin domain;; Immunoglobulin domain;; Immunoglobulin V-set domain;; Immunoglobulin I-set domain;; CD80-like C2-set immunoglobulin domain
cycg050523	0.0322053	-1.49086	DOWN	--	T/B cell antigen activation	CD22	PREDICTED: B-cell receptor CD22-like isoform X2 [Danio rerio]	Schwann cell myelin protein (Precursor) GN=SMP OS=Coturnix coturnix japonica (Japanese quail) PE=1 SV=1	Immunoglobulin domain;; Immunoglobulin V-set domain;; Immunoglobulin domain;; Immunoglobulin I-set domain;; Immunoglobulin domain;; Immunoglobulin domain;; Immunoglobulin V-set domain;; Immunoglobulin domain;; Immunoglobulin I-set domain;; Immunoglobulin domain;; Immunoglobulin I-set domain;; Immunoglobulin domain;; Immunoglobulin domain;; Immunoglobulin V-set domain
cycg033310	0.000591696	-2.04589	DOWN	--	T/B cell antigen activation	CD276	PREDICTED: butyrophilin subfamily 2 member A2-like [Danio rerio]	CD276 antigen homolog (Precursor) GN=cd276 OS=Xenopus laevis (African clawed frog) PE=2 SV=1	Immunoglobulin V-set domain;; SPRY domain;; Immunoglobulin domain;; CD80-like C2-set immunoglobulin domain;; Immunoglobulin I-set domain
cycg029313	0.0389952	-1.56758	DOWN	--	T/B cell antigen activation	CD276	unnamed protein product [Oncorhynchus mykiss]	CD276 antigen homolog (Precursor) GN=cd276 OS=Xenopus laevis (African clawed frog) PE=2 SV=1	Immunoglobulin V-set domain;; Immunoglobulin I-set domain;; Immunoglobulin domain;; CD80-like C2-set immunoglobulin domain
cycg035559	0.0371698	-1.54836	DOWN	--	T/B cell antigen activation	CD276	PREDICTED: uncharacterized protein si:ch211-241b2.5 [Danio rerio]	CD276 antigen homolog (Precursor) GN=cd276 OS=Xenopus laevis (African clawed frog) PE=2 SV=1	Immunoglobulin domain;; Immunoglobulin V-set domain;; Immunoglobulin domain;; Immunoglobulin I-set domain;; Immunoglobulin domain;; CD80-like C2-set immunoglobulin domain;; NACHT domain
cycg007048	1.02e-07	-1.61938	DOWN	--	T/B cell antigen activation	FCR	PREDICTED: Fc receptor-like protein 5 [Danio rerio]	Contactin-2 (Precursor) GN=CNTN2 OS=Gallus gallus (Chicken) PE=1 SV=1	Immunoglobulin domain;; Immunoglobulin domain;; Immunoglobulin domain;; Immunoglobulin I-set domain
PB.3767	0.00631741	-1.00301	DOWN	K07983	T/B cell antigen activation	FCR	IgE Fc receptor high affinity I gamma polypeptide [Ctenopharyngodon idella]	--	T-cell surface glycoprotein CD3 zeta chain;; Immunoreceptor tyrosine-based activation motif
cycg035416	5.25e-09	-2.3054	DOWN	--	T/B cell antigen activation	HDAC	PREDICTED: histone deacetylase 9-B isoform X1 [Danio rerio]	Histone deacetylase 9-B GN=hdac9b OS=Danio rerio (Zebrafish) PE=2 SV=1	Glutamine rich N terminal domain of histone deacetylase 4
cycg015421	2.61e-05	-1.83469	DOWN	--	T/B cell antigen activation	HDAC	PREDICTED: histone deacetylase 9-B isoform X1 [Danio rerio]	Histone deacetylase 9-B GN=hdac9b OS=Danio rerio (Zebrafish) PE=2 SV=1	Glutamine rich N terminal domain of histone deacetylase 4
cycg008683	0.000227219	-1.55353	DOWN	K14324	T/B cell antigen activation	HDAC	PREDICTED: histone deacetylase complex subunit SAP18 [Astyanax mexicanus]	--	Sin3 associated polypeptide p18 (SAP18)
cycg008689	0.000448165	-1.1411	DOWN	K14324	T/B cell antigen activation	HDAC	histone deacetylase complex subunit SAP18 [Danio rerio]	--	Sin3 associated polypeptide p18 (SAP18)
cycg002957	0.0270545	-1.04351	DOWN	K06067	T/B cell antigen activation	HDAC	PREDICTED: histone deacetylase 3-like, partial [Astyanax mexicanus]	Histone deacetylase 3 GN=hdac3 OS=Danio rerio (Zebrafish) PE=2 SV=1	Histone deacetylase domain
cycg048999	0.000598897	-1.45237	DOWN	--	T/B cell antigen activation	HMG	PREDICTED: HMG box transcription factor BBX isoform X2 [Danio rerio]	--	Immunoglobulin V-set domain;; Natural killer cell receptor 2B4;; Immunoglobulin I-set domain;; Immunoglobulin domain;; Immunoglobulin domain;; Immunoglobulin C1-set domain;; Immunoglobulin C1-set domain
cycg045684	0.0196572	-2.46036	DOWN	--	T/B cell antigen activation	Ig light chain	immunoglobulin light chain [Danio rerio]	--	--
cycg017858	0.0108255	-1.60896	DOWN	--	T/B cell antigen activation	Ig light chain	immunoglobulin light chain [Cyprinus carpio]	Ig lambda chain V-1 region (Precursor) OS=Gallus gallus (Chicken) PE=4 SV=1	Immunoglobulin V-set domain;; Immunoglobulin domain;; Immunoglobulin I-set domain;; Immunoglobulin domain
cycg029985	3.94e-05	-1.55875	DOWN	K10807	T/B cell antigen activation	PBX	pre-B-cell leukemia homeobox 1a isoform 2 [Danio rerio]	Pre-B-cell leukemia transcription factor 1 {ECO:0000250|UniProtKB:P40424} OS=Xenopus tropicalis (Western clawed frog) PE=2 SV=1	PBC domain;; Ribonucleotide reductase, barrel domain;; Homeobox domain;; Homeobox KN domain
cycg026026	0.000204769	-1.08064	DOWN	--	T/B cell antigen activation	PBX	PREDICTED: pre-B-cell leukemia transcription factor-interacting protein 1 isoform X2 [Danio rerio]	Chromatin assembly factor 1 subunit A-A GN=chaf1a-a OS=Xenopus laevis (African clawed frog) PE=1 SV=1	--
cycg040049	0.00319249	-3.26162	DOWN	--	T/B cell antigen activation	PIGR	PREDICTED: polymeric immunoglobulin receptor-like isoform X2 [Danio rerio]	--	Immunoglobulin V-set domain
PB.4557	0.000314255	-1.20289	DOWN	--	T/B cell antigen activation	PIGR	PREDICTED: polymeric immunoglobulin receptor-like [Danio rerio]	--	Immunoglobulin V-set domain;; Immunoglobulin domain;; Immunoglobulin domain;; Immunoglobulin I-set domain
cycg004245	0.0112755	-2.50592	DOWN	--	T/B cell antigen activation	SEMA	semaphorin-3E precursor [Danio rerio]	Semaphorin-3E (Precursor) GN=SEMA3E OS=Gallus gallus (Chicken) PE=2 SV=1	Sema domain
cycg003596	0.000370441	-1.89205	DOWN	--	T/B cell antigen activation	SEMA	PREDICTED: semaphorin-7A-like, partial [Danio rerio]	Semaphorin-3A (Precursor) GN=SEMA3A OS=Gallus gallus (Chicken) PE=1 SV=1	Sema domain;; Plexin repeat
cycg034508	0.0117364	-1.70381	DOWN	--	T/B cell antigen activation	SEMA	PREDICTED: semaphorin-4A isoform X2 [Danio rerio]	Semaphorin-4E (Precursor) GN=sema4e OS=Danio rerio (Zebrafish) PE=2 SV=1	Plexin repeat
cycg034514	0.0196288	-1.51582	DOWN	--	T/B cell antigen activation	SEMA	PREDICTED: semaphorin-4A isoform X1 [Danio rerio]	Semaphorin-4E (Precursor) GN=sema4e OS=Danio rerio (Zebrafish) PE=2 SV=1	Sema domain;; Plexin repeat
cycg036434	1.17e-13	-2.23702	DOWN	--	T/B cell antigen activation	TAGAP	PREDICTED: T-cell activation Rho GTPase-activating protein isoform X1 [Danio rerio]	Rho GTPase-activating protein 21 GN=arhgap21 OS=Xenopus tropicalis (Western clawed frog) PE=2 SV=1	RhoGAP domain
cycg016527	0.0145035	-1.89374	DOWN	--	T/B cell antigen activation	TAL	PREDICTED: T-cell acute lymphocytic leukemia protein 2 isoform X1 [Danio rerio]	T-cell acute lymphocytic leukemia protein 1 OS=Xenopus laevis (African clawed frog) PE=2 SV=1	Helix-loop-helix DNA-binding domain
cycg027469	5.89e-16	-3.42931	DOWN	K02154	T/B cell antigen activation	TCIRG1	T-cell immune regulator 1 [Danio rerio]	V-type proton ATPase 116 kDa subunit a isoform 1 GN=atp6v0a1 OS=Xenopus tropicalis (Western clawed frog) PE=2 SV=1	V-type ATPase 116kDa subunit family;; V-type ATPase 116kDa subunit family
cycg014594	1.33e-08	-2.85751	DOWN	K02154	T/B cell antigen activation	TCIRG2	T-cell immune regulator 1 [Danio rerio]	V-type proton ATPase 116 kDa subunit a isoform 1 GN=atp6v0a1 OS=Xenopus tropicalis (Western clawed frog) PE=2 SV=1	V-type ATPase 116kDa subunit family
cycg014592	6.97e-13	-2.93114	DOWN	K02154	T/B cell antigen activation	TCIRG3	T-cell immune regulator 1 [Danio rerio]	V-type proton ATPase 116 kDa subunit a isoform 1 GN=atp6v0a1 OS=Xenopus tropicalis (Western clawed frog) PE=2 SV=1	V-type ATPase 116kDa subunit family
cycg002166	0.0229486	-1.38704	DOWN	--	T/B cell antigen activation	VSIG	PREDICTED: V-set and immunoglobulin domain-containing protein 1-like, partial [Esox lucius]	Ig heavy chain V region (Precursor) OS=Heterodontus francisci (Horn shark) PE=4 SV=1	Immunoglobulin V-set domain;; Immunoglobulin V-set domain
cycg039450	0.00742623	-1.09857	DOWN	--	T/B cell antigen activation	WWP	PREDICTED: NEDD4-like E3 ubiquitin-protein ligase WWP2 isoform X2 [Danio rerio]	--	C2 domain
cycg023751	0.0188275	-1.0503	DOWN	K10592	T/B cell antigen activation	WWP	NEDD4-like E3 ubiquitin-protein ligase WWP2 [Danio rerio]	E3 ubiquitin-protein ligase SMURF2 GN=smurf2 OS=Danio rerio (Zebrafish) PE=2 SV=1	HECT-domain (ubiquitin-transferase);; WW domain

## Sheet: GO terms for BP
GO.ID	Term	Annotated	Significant	Expected	KS
GO:0015991	ATP hydrolysis coupled proton transport	67	30	9.3	3.5e-09
GO:0032496	response to lipopolysaccharide	41	19	5.69	1.9e-07
GO:0006096	glycolytic process	104	37	14.44	1.1e-06
GO:0055114	oxidation-reduction process	1131	239	157.07	4.2e-06
GO:0015986	ATP synthesis coupled proton transport	19	9	2.64	8.7e-06
GO:0006883	cellular sodium ion homeostasis	6	6	0.83	1.8e-05
GO:0007030	Golgi organization	37	7	5.14	4.8e-05
GO:0030388	fructose 1,6-bisphosphate metabolic process	12	9	1.67	7.5e-05
GO:0042541	hemoglobin biosynthetic process	31	14	4.31	0.00012
GO:0006184	GTP catabolic process	1092	174	151.65	0.00013
GO:0015992	proton transport	152	60	21.11	0.00013
GO:0048661	positive regulation of smooth muscle cell proliferation	21	10	2.92	0.00015
GO:0031101	fin regeneration	264	64	36.66	0.00015
GO:0046835	carbohydrate phosphorylation	39	13	5.42	0.00015
GO:0030860	regulation of polarized epithelial cell differentiation	10	4	1.39	0.00016
GO:0002903	negative regulation of B cell apoptotic process	7	6	0.97	0.00024
GO:0060036	notochord cell vacuolation	20	11	2.78	0.00025
GO:0016337	single organismal cell-cell adhesion	991	134	137.63	0.00027
GO:0070972	protein localization to endoplasmic reticulum	25	5	3.47	0.00039
GO:0006892	post-Golgi vesicle-mediated transport	168	34	23.33	0.00039
GO:0036089	cleavage furrow formation	10	7	1.39	0.00053
GO:0048708	astrocyte differentiation	63	12	8.75	0.00055
GO:0006094	gluconeogenesis	83	23	11.53	0.00055
GO:0007043	cell-cell junction assembly	69	19	9.58	0.00057
GO:2000647	negative regulation of stem cell proliferation	13	1	1.81	0.00058
GO:0031444	slow-twitch skeletal muscle fiber contraction	17	0	2.36	0.00072
GO:0051156	glucose 6-phosphate metabolic process	11	7	1.53	0.00076
GO:0090002	establishment of protein localization to plasma membrane	100	22	13.89	0.00079
GO:0009791	post-embryonic development	170	32	23.61	0.00085
GO:0006432	phenylalanyl-tRNA aminoacylation	6	5	0.83	0.00097
GO:0048015	phosphatidylinositol-mediated signaling	99	12	13.75	0.00099
GO:0048914	myelination of anterior lateral line nerve axons	9	5	1.25	0.00103
GO:2001295	malonyl-CoA biosynthetic process	11	6	1.53	0.00107
GO:0060347	heart trabecula formation	10	7	1.39	0.0012
GO:0051256	mitotic spindle midzone assembly	6	5	0.83	0.00123
GO:0030032	lamellipodium assembly	34	6	4.72	0.00123
GO:0071396	cellular response to lipid	415	84	57.63	0.0013
GO:0006044	N-acetylglucosamine metabolic process	7	5	0.97	0.0013
GO:0000187	activation of MAPK activity	127	21	17.64	0.00134
GO:0006631	fatty acid metabolic process	177	47	24.58	0.00139
GO:0001937	negative regulation of endothelial cell proliferation	30	13	4.17	0.00142
GO:0034755	iron ion transmembrane transport	17	9	2.36	0.00151
GO:0002043	blood vessel endothelial cell proliferation involved in sprouting angiogenesis	18	3	2.5	0.00169
GO:0048483	autonomic nervous system development	125	25	17.36	0.0017
GO:1902531	regulation of intracellular signal transduction	1854	302	257.48	0.0018
GO:0050909	sensory perception of taste	15	3	2.08	0.00181
GO:0032008	positive regulation of TOR signaling	17	7	2.36	0.00182
GO:0055072	iron ion homeostasis	78	19	10.83	0.00185
GO:0090150	establishment of protein localization to membrane	224	44	31.11	0.00187
GO:0007213	G-protein coupled acetylcholine receptor signaling pathway	35	8	4.86	0.00194
GO:0019752	carboxylic acid metabolic process	793	201	110.13	0.00199
GO:0051785	positive regulation of nuclear division	8	1	1.11	0.00217
GO:0006414	translational elongation	105	15	14.58	0.00217
GO:0001701	in utero embryonic development	213	44	29.58	0.00226
GO:0071158	positive regulation of cell cycle arrest	7	5	0.97	0.00229
GO:0030225	macrophage differentiation	20	5	2.78	0.00233
GO:0060445	branching involved in salivary gland morphogenesis	28	12	3.89	0.00234
GO:0010447	response to acidic pH	17	8	2.36	0.00234
GO:0070527	platelet aggregation	24	4	3.33	0.00247
GO:0007264	small GTPase mediated signal transduction	1430	221	198.59	0.00261
GO:0008333	endosome to lysosome transport	25	10	3.47	0.00265
GO:0030852	regulation of granulocyte differentiation	6	3	0.83	0.0028
GO:0060602	branch elongation of an epithelium	50	17	6.94	0.00286
GO:0007638	mechanosensory behavior	11	1	1.53	0.00292
GO:0002224	toll-like receptor signaling pathway	276	50	38.33	0.00299
GO:0040014	regulation of multicellular organism growth	62	11	8.61	0.00304
GO:0006072	glycerol-3-phosphate metabolic process	15	8	2.08	0.00326
GO:0071383	cellular response to steroid hormone stimulus	259	50	35.97	0.00329
GO:0030201	heparan sulfate proteoglycan metabolic process	68	13	9.44	0.00329
GO:0014032	neural crest cell development	517	72	71.8	0.00335
GO:0007498	mesoderm development	999	145	138.74	0.00351
GO:0008057	eye pigment granule organization	11	6	1.53	0.00354
GO:0014013	regulation of gliogenesis	196	29	27.22	0.00361
GO:0035089	establishment of apical/basal cell polarity	25	9	3.47	0.00363
GO:0061484	hematopoietic stem cell homeostasis	30	8	4.17	0.00368
GO:2000178	negative regulation of neural precursor cell proliferation	13	4	1.81	0.00372
GO:0071236	cellular response to antibiotic	8	3	1.11	0.00376
GO:0035914	skeletal muscle cell differentiation	36	11	5	0.00381
GO:0048569	post-embryonic organ development	100	19	13.89	0.00397
GO:0031550	positive regulation of brain-derived neurotrophic factor receptor signaling pathway	6	0	0.83	0.00397
GO:0090017	anterior neural plate formation	6	0	0.83	0.00397
GO:0034501	protein localization to kinetochore	7	5	0.97	0.00399
GO:0035912	dorsal aorta morphogenesis	7	4	0.97	0.0041
GO:1901607	alpha-amino acid biosynthetic process	76	21	10.55	0.00411
GO:0048011	neurotrophin TRK receptor signaling pathway	23	5	3.19	0.00431
GO:0035588	G-protein coupled purinergic receptor signaling pathway	82	22	11.39	0.00432
GO:0021576	hindbrain formation	17	8	2.36	0.0044
GO:0045639	positive regulation of myeloid cell differentiation	56	8	7.78	0.00443
GO:0060686	negative regulation of prostatic bud formation	8	4	1.11	0.00455
GO:0014846	esophagus smooth muscle contraction	8	4	1.11	0.00455
GO:0031589	cell-substrate adhesion	287	48	39.86	0.0046
GO:0006690	icosanoid metabolic process	40	13	5.56	0.00466
GO:0050832	defense response to fungus	16	7	2.22	0.0047
GO:0071542	dopaminergic neuron differentiation	57	11	7.92	0.00475
GO:0048250	mitochondrial iron ion transport	7	5	0.97	0.00478
GO:0048146	positive regulation of fibroblast proliferation	10	3	1.39	0.0048
GO:0071230	cellular response to amino acid stimulus	23	8	3.19	0.0048
GO:0071901	negative regulation of protein serine/threonine kinase activity	87	26	12.08	0.00484
GO:0001892	embryonic placenta development	64	17	8.89	0.00486
GO:0006911	phagocytosis, engulfment	11	3	1.53	0.00488
GO:0060442	branching involved in prostate gland morphogenesis	66	22	9.17	0.00489
GO:0042098	T cell proliferation	29	7	4.03	0.00502
GO:0018108	peptidyl-tyrosine phosphorylation	278	50	38.61	0.00504
GO:0048557	embryonic digestive tract morphogenesis	49	14	6.8	0.00508
GO:0060525	prostate glandular acinus development	28	11	3.89	0.00509
GO:0045333	cellular respiration	58	19	8.05	0.0051
GO:0035860	glial cell-derived neurotrophic factor receptor signaling pathway	12	5	1.67	0.00516
GO:0051101	regulation of DNA binding	48	8	6.67	0.00517
GO:0007205	protein kinase C-activating G-protein coupled receptor signaling pathway	25	4	3.47	0.00529
GO:0009225	nucleotide-sugar metabolic process	27	7	3.75	0.0054
GO:2000143	negative regulation of DNA-templated transcription, initiation	11	5	1.53	0.00541
GO:0010594	regulation of endothelial cell migration	68	16	9.44	0.0057
GO:0072655	establishment of protein localization to mitochondrion	23	8	3.19	0.00571
GO:0031662	positive regulation of cyclin-dependent protein serine/threonine kinase activity involved in G2/M transition of mitotic cell cycle	11	6	1.53	0.00571
GO:0070194	synaptonemal complex disassembly	11	6	1.53	0.00571
GO:0006605	protein targeting	383	58	53.19	0.00571
GO:0009749	response to glucose	40	8	5.56	0.00572
GO:2000146	negative regulation of cell motility	198	41	27.5	0.00573
GO:0006898	receptor-mediated endocytosis	231	54	32.08	0.00576
GO:0050772	positive regulation of axonogenesis	63	11	8.75	0.00576
GO:0060049	regulation of protein glycosylation	10	2	1.39	0.00579
GO:0010464	regulation of mesenchymal cell proliferation	51	11	7.08	0.00581
GO:0040037	negative regulation of fibroblast growth factor receptor signaling pathway	27	9	3.75	0.00582
GO:0006040	amino sugar metabolic process	26	10	3.61	0.00582
GO:0046777	protein autophosphorylation	429	73	59.58	0.00582
GO:0030879	mammary gland development	100	20	13.89	0.00586
GO:0007076	mitotic chromosome condensation	13	0	1.81	0.00597
GO:0016525	negative regulation of angiogenesis	40	9	5.56	0.00598
GO:0045576	mast cell activation	8	5	1.11	0.006
GO:0002275	myeloid cell activation involved in immune response	54	18	7.5	0.00604
GO:0050994	regulation of lipid catabolic process	11	4	1.53	0.00607
GO:0045807	positive regulation of endocytosis	7	2	0.97	0.00609
GO:0033081	regulation of T cell differentiation in thymus	17	6	2.36	0.00609
GO:0032376	positive regulation of cholesterol transport	10	1	1.39	0.0061
GO:0036022	limb joint morphogenesis	22	8	3.06	0.00617
GO:0019370	leukotriene biosynthetic process	14	2	1.94	0.00624
GO:0046329	negative regulation of JNK cascade	35	2	4.86	0.00627
GO:0045921	positive regulation of exocytosis	27	3	3.75	0.00629
GO:0042593	glucose homeostasis	76	16	10.55	0.00631
GO:0060026	convergent extension	686	92	95.27	0.00633
GO:0007229	integrin-mediated signaling pathway	97	14	13.47	0.00634
GO:0015695	organic cation transport	6	2	0.83	0.00653
GO:2000794	regulation of epithelial cell proliferation involved in lung morphogenesis	27	7	3.75	0.00654
GO:0032092	positive regulation of protein binding	20	6	2.78	0.00672
GO:0009064	glutamine family amino acid metabolic process	71	19	9.86	0.00679
GO:0033334	fin morphogenesis	321	50	44.58	0.00688
GO:0001957	intramembranous ossification	18	8	2.5	0.00694
GO:1903050	regulation of proteolysis involved in cellular protein catabolic process	92	22	12.78	0.00696
GO:0090382	phagosome maturation	6	1	0.83	0.00719
GO:0006783	heme biosynthetic process	29	4	4.03	0.00724
GO:0021534	cell proliferation in hindbrain	66	9	9.17	0.00728
GO:0071216	cellular response to biotic stimulus	26	9	3.61	0.00729
GO:0050870	positive regulation of T cell activation	72	15	10	0.00743
GO:0002065	columnar/cuboidal epithelial cell differentiation	236	47	32.77	0.00747
GO:0007528	neuromuscular junction development	72	16	10	0.0075
GO:0043039	tRNA aminoacylation	85	28	11.8	0.0075
GO:0046348	amino sugar catabolic process	8	3	1.11	0.00761
GO:0071467	cellular response to pH	9	2	1.25	0.00768
GO:0010039	response to iron ion	8	4	1.11	0.00771
GO:2000147	positive regulation of cell motility	213	30	29.58	0.00783
GO:0019511	peptidyl-proline hydroxylation	7	5	0.97	0.00784
GO:0046394	carboxylic acid biosynthetic process	282	59	39.16	0.00805
GO:0007413	axonal fasciculation	226	39	31.39	0.00812
GO:0043570	maintenance of DNA repeat elements	6	0	0.83	0.00814
GO:0060043	regulation of cardiac muscle cell proliferation	66	19	9.17	0.00819
GO:0002063	chondrocyte development	20	8	2.78	0.00823
GO:0032844	regulation of homeostatic process	174	28	24.16	0.00831
GO:0000165	MAPK cascade	1040	179	144.43	0.00836
GO:0001523	retinoid metabolic process	81	7	11.25	0.00838
GO:0022612	gland morphogenesis	228	54	31.66	0.00839
GO:0007618	mating	17	6	2.36	0.00842
GO:0046668	regulation of retinal cell programmed cell death	10	0	1.39	0.00843
GO:0050768	negative regulation of neurogenesis	409	51	56.8	0.00845
GO:0060468	prevention of polyspermy	6	1	0.83	0.00845
GO:0060322	head development	200	24	27.78	0.00846
GO:0032606	type I interferon production	27	7	3.75	0.00848
GO:0008299	isoprenoid biosynthetic process	51	8	7.08	0.0085
GO:0009081	branched-chain amino acid metabolic process	10	0	1.39	0.00872
GO:0006577	amino-acid betaine metabolic process	13	6	1.81	0.0088
GO:0046676	negative regulation of insulin secretion	12	1	1.67	0.009
GO:0035108	limb morphogenesis	383	64	53.19	0.00926
GO:0014898	cardiac muscle hypertrophy in response to stress	7	3	0.97	0.00927
GO:0061138	morphogenesis of a branching epithelium	586	105	81.38	0.00946
GO:0021538	epithalamus development	132	22	18.33	0.00955
GO:0021532	neural tube patterning	265	30	36.8	0.00957
GO:0021543	pallium development	148	21	20.55	0.00969
GO:0060285	cilium-dependent cell motility	26	8	3.61	0.00987
GO:0002028	regulation of sodium ion transport	23	3	3.19	0.01
GO:0071326	cellular response to monosaccharide stimulus	9	2	1.25	0.01006
GO:0071331	cellular response to hexose stimulus	9	2	1.25	0.01006
GO:0071333	cellular response to glucose stimulus	9	2	1.25	0.01006
GO:0035773	insulin secretion involved in cellular response to glucose stimulus	9	2	1.25	0.01006
GO:0061178	regulation of insulin secretion involved in cellular response to glucose stimulus	9	2	1.25	0.01006
GO:0044331	cell-cell adhesion mediated by cadherin	21	1	2.92	0.01024
GO:0061008	hepaticobiliary system development	508	91	70.55	0.01037
GO:0043330	response to exogenous dsRNA	25	10	3.47	0.01069
GO:0002764	immune response-regulating signaling pathway	399	75	55.41	0.01069
GO:0060027	convergent extension involved in gastrulation	489	68	67.91	0.01069
GO:0032465	regulation of cytokinesis	61	18	8.47	0.01077
GO:0021554	optic nerve development	42	5	5.83	0.01081
GO:0006893	Golgi to plasma membrane transport	101	17	14.03	0.01094
GO:0071222	cellular response to lipopolysaccharide	15	5	2.08	0.01117
GO:0071219	cellular response to molecule of bacterial origin	15	5	2.08	0.01117
GO:0001676	long-chain fatty acid metabolic process	22	10	3.06	0.01117
GO:0090068	positive regulation of cell cycle process	83	21	11.53	0.0112
GO:0061031	endodermal digestive tract morphogenesis	14	7	1.94	0.01127
GO:0031663	lipopolysaccharide-mediated signaling pathway	8	3	1.11	0.01142
GO:0002921	negative regulation of humoral immune response	12	4	1.67	0.01148
GO:0016477	cell migration	2545	371	353.44	0.01154
GO:0043392	negative regulation of DNA binding	22	6	3.06	0.01155
GO:0060294	cilium movement involved in cell motility	8	4	1.11	0.01156
GO:0001889	liver development	504	89	69.99	0.01173
GO:0038061	NIK/NF-kappaB signaling	48	15	6.67	0.01175
GO:1901222	regulation of NIK/NF-kappaB signaling	48	15	6.67	0.01175
GO:2000649	regulation of sodium ion transmembrane transporter activity	11	2	1.53	0.01177
GO:1902305	regulation of sodium ion transmembrane transport	11	2	1.53	0.01177
GO:0006054	N-acetylneuraminate metabolic process	9	3	1.25	0.01179
GO:0009967	positive regulation of signal transduction	1580	236	219.43	0.0118
GO:0002027	regulation of heart rate	32	7	4.44	0.01193
GO:0010565	regulation of cellular ketone metabolic process	83	9	11.53	0.01198
GO:0006367	transcription initiation from RNA polymerase II promoter	54	14	7.5	0.01201
GO:0048009	insulin-like growth factor receptor signaling pathway	114	25	15.83	0.01211
GO:0035855	megakaryocyte development	7	2	0.97	0.01211
GO:0043627	response to estrogen	123	24	17.08	0.01218
GO:0045840	positive regulation of mitosis	6	1	0.83	0.0124
GO:0001553	luteinization	24	7	3.33	0.01243
GO:0032438	melanosome organization	18	7	2.5	0.01258
GO:1901570	fatty acid derivative biosynthetic process	36	11	5	0.01273
GO:0046456	icosanoid biosynthetic process	36	11	5	0.01273
GO:0002684	positive regulation of immune system process	606	113	84.16	0.01292
GO:2000058	regulation of protein ubiquitination involved in ubiquitin-dependent protein catabolic process	15	6	2.08	0.01293
GO:0072661	protein targeting to plasma membrane	7	1	0.97	0.01297
GO:0032259	methylation	413	48	57.36	0.01298
GO:0035929	steroid hormone secretion	30	7	4.17	0.01301
GO:0006970	response to osmotic stress	39	14	5.42	0.01309
GO:0002042	cell migration involved in sprouting angiogenesis	21	8	2.92	0.01318
GO:0071391	cellular response to estrogen stimulus	80	15	11.11	0.01339
GO:0034067	protein localization to Golgi apparatus	28	6	3.89	0.01348
GO:0035437	maintenance of protein localization in endoplasmic reticulum	8	1	1.11	0.01351
GO:0006621	protein retention in ER lumen	8	1	1.11	0.01351
GO:0045582	positive regulation of T cell differentiation	19	3	2.64	0.01367
GO:0045022	early endosome to late endosome transport	19	6	2.64	0.0137
GO:0045599	negative regulation of fat cell differentiation	16	2	2.22	0.01381
GO:0008361	regulation of cell size	278	46	38.61	0.0139
GO:0042990	regulation of transcription factor import into nucleus	28	8	3.89	0.014
GO:0042991	transcription factor import into nucleus	28	8	3.89	0.014
GO:0003401	axis elongation	181	34	25.14	0.01401
GO:0006578	amino-acid betaine biosynthetic process	10	6	1.39	0.01404
GO:0007406	negative regulation of neuroblast proliferation	7	1	0.97	0.0141
GO:0042035	regulation of cytokine biosynthetic process	31	6	4.31	0.01413
GO:0030335	positive regulation of cell migration	208	29	28.89	0.01418
GO:0010647	positive regulation of cell communication	1589	236	220.68	0.01431
GO:0060736	prostate gland growth	27	9	3.75	0.01437
GO:0042989	sequestering of actin monomers	10	3	1.39	0.01459
GO:0048584	positive regulation of response to stimulus	2069	318	287.34	0.01459
GO:0006418	tRNA aminoacylation for protein translation	80	26	11.11	0.01463
GO:0006119	oxidative phosphorylation	17	8	2.36	0.01464
GO:0006955	immune response	942	179	130.82	0.01466
GO:0060737	prostate gland morphogenetic growth	23	8	3.19	0.01472
GO:0042398	cellular modified amino acid biosynthetic process	38	9	5.28	0.01485
GO:0045765	regulation of angiogenesis	162	26	22.5	0.01486
GO:0002446	neutrophil mediated immunity	7	4	0.97	0.01502
GO:0032880	regulation of protein localization	441	69	61.24	0.01507
GO:0007509	mesoderm migration involved in gastrulation	194	37	26.94	0.01511
GO:0000188	inactivation of MAPK activity	33	12	4.58	0.01524
GO:0060510	Type II pneumocyte differentiation	7	1	0.97	0.01536
GO:0061140	lung secretory cell differentiation	7	1	0.97	0.01536
GO:0060740	prostate gland epithelium morphogenesis	90	32	12.5	0.01545
GO:0023056	positive regulation of signaling	1588	236	220.54	0.01556
GO:1901605	alpha-amino acid metabolic process	187	47	25.97	0.01556
GO:0045685	regulation of glial cell differentiation	169	24	23.47	0.01575
GO:0048485	sympathetic nervous system development	65	15	9.03	0.01585
GO:0009226	nucleotide-sugar biosynthetic process	15	6	2.08	0.01589
GO:0032102	negative regulation of response to external stimulus	185	28	25.69	0.01608
GO:0002274	myeloid leukocyte activation	79	26	10.97	0.01613
GO:0042116	macrophage activation	15	3	2.08	0.01636
GO:0042992	negative regulation of transcription factor import into nucleus	14	5	1.94	0.01638
GO:0060560	developmental growth involved in morphogenesis	692	112	96.1	0.01642
GO:0043981	histone H4-K5 acetylation	8	1	1.11	0.01646
GO:0043982	histone H4-K8 acetylation	8	1	1.11	0.01646
GO:0046671	negative regulation of retinal cell programmed cell death	9	0	1.25	0.0165
GO:2000651	positive regulation of sodium ion transmembrane transporter activity	8	1	1.11	0.01658
GO:0032417	positive regulation of sodium:proton antiporter activity	8	1	1.11	0.01658
GO:0036293	response to decreased oxygen levels	157	36	21.8	0.01665
GO:0001666	response to hypoxia	157	36	21.8	0.01665
GO:0070482	response to oxygen levels	157	36	21.8	0.01665
GO:0043518	negative regulation of DNA damage response, signal transduction by p53 class mediator	10	3	1.39	0.01697
GO:0061387	regulation of extent of cell growth	276	45	38.33	0.01708
GO:0051155	positive regulation of striated muscle cell differentiation	20	6	2.78	0.0171
GO:2000047	regulation of cell-cell adhesion mediated by cadherin	20	1	2.78	0.01713
GO:1902106	negative regulation of leukocyte differentiation	38	7	5.28	0.01726
GO:0016114	terpenoid biosynthetic process	36	1	5	0.01728
GO:0042129	regulation of T cell proliferation	27	6	3.75	0.01733
GO:0030516	regulation of axon extension	242	41	33.61	0.01734
GO:0030816	positive regulation of cAMP metabolic process	77	9	10.69	0.01753
GO:0030819	positive regulation of cAMP biosynthetic process	77	9	10.69	0.01753
GO:0021588	cerebellum formation	8	3	1.11	0.01763
GO:0071910	determination of liver left/right asymmetry	77	19	10.69	0.01779
GO:0032878	regulation of establishment or maintenance of cell polarity	18	5	2.5	0.01795
GO:0044706	multi-multicellular organism process	67	17	9.3	0.01802
GO:0042701	progesterone secretion	23	7	3.19	0.01822
GO:1903035	negative regulation of response to wounding	140	21	19.44	0.01825
GO:0007265	Ras protein signal transduction	868	132	120.54	0.01833
GO:0009445	putrescine metabolic process	11	6	1.53	0.01834
GO:0006002	fructose 6-phosphate metabolic process	16	4	2.22	0.01843
GO:0021522	spinal cord motor neuron differentiation	206	36	28.61	0.01843
GO:0007059	chromosome segregation	213	38	29.58	0.01849
GO:0034754	cellular hormone metabolic process	122	9	16.94	0.01856
GO:0048710	regulation of astrocyte differentiation	41	6	5.69	0.01866
GO:0002768	immune response-regulating cell surface receptor signaling pathway	123	25	17.08	0.01868
GO:0050851	antigen receptor-mediated signaling pathway	113	21	15.69	0.01874
GO:0033045	regulation of sister chromatid segregation	7	1	0.97	0.01887
GO:0033047	regulation of mitotic sister chromatid segregation	7	1	0.97	0.01887
GO:0043122	regulation of I-kappaB kinase/NF-kappaB signaling	143	23	19.86	0.01891
GO:0070286	axonemal dynein complex assembly	10	4	1.39	0.01893
GO:0030865	cortical cytoskeleton organization	62	17	8.61	0.01899
GO:0030866	cortical actin cytoskeleton organization	62	17	8.61	0.01899
GO:0032409	regulation of transporter activity	54	8	7.5	0.01902
GO:0022898	regulation of transmembrane transporter activity	54	8	7.5	0.01902
GO:0008217	regulation of blood pressure	72	18	10	0.01909
GO:0039020	pronephric nephron tubule development	267	44	37.08	0.01922
GO:0072194	kidney smooth muscle tissue development	6	2	0.83	0.0193
GO:0072195	kidney smooth muscle cell differentiation	6	2	0.83	0.0193
GO:0051151	negative regulation of smooth muscle cell differentiation	6	2	0.83	0.0193
GO:0051152	positive regulation of smooth muscle cell differentiation	6	2	0.83	0.0193
GO:2000061	regulation of ureter smooth muscle cell differentiation	6	2	0.83	0.0193
GO:2000356	regulation of kidney smooth muscle cell differentiation	6	2	0.83	0.0193
GO:0006626	protein targeting to mitochondrion	16	5	2.22	0.01931
GO:0018193	peptidyl-amino acid modification	1063	158	147.63	0.01935
GO:0043507	positive regulation of JUN kinase activity	68	11	9.44	0.01939
GO:0045198	establishment of epithelial cell apical/basal polarity	12	4	1.67	0.01946
GO:0032365	intracellular lipid transport	11	4	1.53	0.01947
GO:0048755	branching morphogenesis of a nerve	109	19	15.14	0.0195
GO:0032319	regulation of Rho GTPase activity	286	53	39.72	0.01954
GO:0009790	embryo development	6258	872	869.09	0.01964
GO:0048870	cell motility	2635	386	365.94	0.01995
GO:0061097	regulation of protein tyrosine kinase activity	11	5	1.53	0.01995
GO:0018198	peptidyl-cysteine modification	12	4	1.67	0.02023
GO:0002067	glandular epithelial cell differentiation	34	7	4.72	0.02028
GO:0031398	positive regulation of protein ubiquitination	73	15	10.14	0.02029
GO:1903322	positive regulation of protein modification by small protein conjugation or removal	73	15	10.14	0.02029
GO:0097066	response to thyroid hormone	6	4	0.83	0.02058
GO:0097067	cellular response to thyroid hormone stimulus	6	4	0.83	0.02058
GO:0006825	copper ion transport	13	4	1.81	0.02071
GO:0035821	modification of morphology or physiology of other organism	91	15	12.64	0.02081
GO:0034976	response to endoplasmic reticulum stress	34	12	4.72	0.02084
GO:0051147	regulation of muscle cell differentiation	123	30	17.08	0.02086
GO:0070285	pigment cell development	9	3	1.25	0.02088
GO:0002443	leukocyte mediated immunity	67	14	9.3	0.02103
GO:0046825	regulation of protein export from nucleus	13	0	1.81	0.02106
GO:0031018	endocrine pancreas development	141	23	19.58	0.02145
GO:0019695	choline metabolic process	9	3	1.25	0.02151
GO:0048588	developmental cell growth	469	78	65.13	0.02152
GO:0009408	response to heat	67	16	9.3	0.02166
GO:0051674	localization of cell	2638	386	366.36	0.02172
GO:0051100	negative regulation of binding	32	8	4.44	0.02175
GO:0009396	folic acid-containing compound biosynthetic process	12	6	1.67	0.02175
GO:0060045	positive regulation of cardiac muscle cell proliferation	25	10	3.47	0.02202
GO:0002755	MyD88-dependent toll-like receptor signaling pathway	92	18	12.78	0.02206
GO:0043408	regulation of MAPK cascade	918	157	127.49	0.02209
GO:0043535	regulation of blood vessel endothelial cell migration	14	4	1.94	0.02225
GO:1901264	carbohydrate derivative transport	56	7	7.78	0.02227
GO:0071300	cellular response to retinoic acid	117	25	16.25	0.02231
GO:0046688	response to copper ion	40	13	5.56	0.02246
GO:1903076	regulation of protein localization to plasma membrane	22	9	3.06	0.02256
GO:0090003	regulation of establishment of protein localization to plasma membrane	22	9	3.06	0.02256
GO:0072080	nephron tubule development	338	57	46.94	0.02258
GO:0009615	response to virus	94	19	13.05	0.02262
GO:0032318	regulation of Ras GTPase activity	494	80	68.61	0.02263
GO:0060260	regulation of transcription initiation from RNA polymerase II promoter	25	9	3.47	0.02264
GO:0007088	regulation of mitosis	132	24	18.33	0.02269
GO:0030850	prostate gland development	128	41	17.78	0.02282
GO:0043393	regulation of protein binding	74	18	10.28	0.02291
GO:0030223	neutrophil differentiation	19	3	2.64	0.02292
GO:0032675	regulation of interleukin-6 production	26	7	3.61	0.02294
GO:0032635	interleukin-6 production	26	7	3.61	0.02294
GO:0001503	ossification	488	62	67.77	0.02297
GO:0060706	cell differentiation involved in embryonic placenta development	20	8	2.78	0.02305
GO:0042058	regulation of epidermal growth factor receptor signaling pathway	29	10	4.03	0.02321
GO:1901184	regulation of ERBB signaling pathway	29	10	4.03	0.02321
GO:0021986	habenula development	129	19	17.92	0.02328
GO:0002562	somatic diversification of immune receptors via germline recombination within a single locus	45	2	6.25	0.02337
GO:0019218	regulation of steroid metabolic process	49	6	6.8	0.02358
GO:0043254	regulation of protein complex assembly	353	62	49.02	0.02364
GO:0034214	protein hexamerization	11	2	1.53	0.0238
GO:0007041	lysosomal transport	27	12	3.75	0.02381
GO:0043405	regulation of MAP kinase activity	326	60	45.27	0.02423
GO:0060836	lymphatic endothelial cell differentiation	21	8	2.92	0.02427
GO:0010155	regulation of proton transport	10	1	1.39	0.02427
GO:0060501	positive regulation of epithelial cell proliferation involved in lung morphogenesis	23	7	3.19	0.02432
GO:0019216	regulation of lipid metabolic process	163	24	22.64	0.02435
GO:0030947	regulation of vascular endothelial growth factor receptor signaling pathway	59	17	8.19	0.02463
GO:0050868	negative regulation of T cell activation	31	6	4.31	0.02467
GO:0051051	negative regulation of transport	162	22	22.5	0.02475
GO:0060261	positive regulation of transcription initiation from RNA polymerase II promoter	7	4	0.97	0.02475
GO:2000144	positive regulation of DNA-templated transcription, initiation	7	4	0.97	0.02475
GO:0002757	immune response-activating signal transduction	391	71	54.3	0.02485
GO:0042180	cellular ketone metabolic process	104	11	14.44	0.02486
GO:0030336	negative regulation of cell migration	188	39	26.11	0.02488
GO:0002685	regulation of leukocyte migration	40	13	5.56	0.02491
GO:0048259	regulation of receptor-mediated endocytosis	138	30	19.16	0.02506
GO:0060412	ventricular septum morphogenesis	34	12	4.72	0.02515
GO:0042226	interleukin-6 biosynthetic process	11	4	1.53	0.02537
GO:0045408	regulation of interleukin-6 biosynthetic process	11	4	1.53	0.02537
GO:0001570	vasculogenesis	408	77	56.66	0.02545
GO:0001502	cartilage condensation	125	16	17.36	0.0255
GO:0060831	smoothened signaling pathway involved in dorsal/ventral neural tube patterning	14	1	1.94	0.02553
GO:0044262	cellular carbohydrate metabolic process	218	36	30.28	0.02568
GO:0030326	embryonic limb morphogenesis	255	33	35.41	0.02588
GO:0007040	lysosome organization	27	9	3.75	0.02598
GO:0007032	endosome organization	27	9	3.75	0.02598
GO:1902107	positive regulation of leukocyte differentiation	30	4	4.17	0.026
GO:0018105	peptidyl-serine phosphorylation	225	37	31.25	0.02607
GO:0046040	IMP metabolic process	22	0	3.06	0.02611
GO:0046112	nucleobase biosynthetic process	22	0	3.06	0.02611
GO:0042773	ATP synthesis coupled electron transport	15	7	2.08	0.02614
GO:0090066	regulation of anatomical structure size	687	102	95.41	0.02615
GO:0035118	embryonic pectoral fin morphogenesis	166	23	23.05	0.02645
GO:0070723	response to cholesterol	6	1	0.83	0.02648
GO:0036314	response to sterol	6	1	0.83	0.02648
GO:0006612	protein targeting to membrane	74	11	10.28	0.02671
GO:0070663	regulation of leukocyte proliferation	43	9	5.97	0.02672
GO:0050670	regulation of lymphocyte proliferation	43	9	5.97	0.02672
GO:0032944	regulation of mononuclear cell proliferation	43	9	5.97	0.02672
GO:0043506	regulation of JUN kinase activity	89	13	12.36	0.02698
GO:0060976	coronary vasculature development	43	9	5.97	0.02703
GO:0032526	response to retinoic acid	245	52	34.02	0.0271
GO:0042074	cell migration involved in gastrulation	500	68	69.44	0.0271
GO:0006560	proline metabolic process	13	4	1.81	0.02725
GO:0030334	regulation of cell migration	514	85	71.38	0.02741
GO:0048795	swim bladder morphogenesis	20	5	2.78	0.02742
GO:0021675	nerve development	296	36	41.11	0.02752
GO:0010459	negative regulation of heart rate	7	0	0.97	0.0277
GO:0006790	sulfur compound metabolic process	206	35	28.61	0.02782
GO:0030318	melanocyte differentiation	171	35	23.75	0.02786
GO:0030163	protein catabolic process	723	132	100.41	0.02794
GO:0035138	pectoral fin morphogenesis	180	28	25	0.02814
GO:0031290	retinal ganglion cell axon guidance	250	41	34.72	0.02815
GO:0006595	polyamine metabolic process	19	8	2.64	0.02817
GO:0032412	regulation of ion transmembrane transporter activity	53	8	7.36	0.02818
GO:0021515	cell differentiation in spinal cord	488	83	67.77	0.02822
GO:0006953	acute-phase response	9	4	1.25	0.02825
GO:0048638	regulation of developmental growth	423	80	58.74	0.02834
GO:0050796	regulation of insulin secretion	47	10	6.53	0.02836
GO:0042558	pteridine-containing compound metabolic process	34	9	4.72	0.02845
GO:0040015	negative regulation of multicellular organism growth	12	2	1.67	0.02846
GO:0070979	protein K11-linked ubiquitination	18	3	2.5	0.02851
GO:1902533	positive regulation of intracellular signal transduction	730	121	101.38	0.02856
GO:0098602	single organism cell adhesion	1015	143	140.96	0.02859
GO:0070293	renal absorption	29	9	4.03	0.0286
GO:0001754	eye photoreceptor cell differentiation	218	27	30.28	0.02863
GO:1902532	negative regulation of intracellular signal transduction	234	39	32.5	0.02876
GO:0035166	post-embryonic hemopoiesis	30	3	4.17	0.02904
GO:0000042	protein targeting to Golgi	24	5	3.33	0.02919
GO:0000301	retrograde transport, vesicle recycling within Golgi	24	5	3.33	0.02919
GO:0072600	establishment of protein localization to Golgi	24	5	3.33	0.02919
GO:0002699	positive regulation of immune effector process	25	6	3.47	0.02923
GO:0060548	negative regulation of cell death	602	103	83.6	0.02927
GO:0002514	B cell tolerance induction	12	4	1.67	0.02933
GO:0002661	regulation of B cell tolerance induction	12	4	1.67	0.02933
GO:0002663	positive regulation of B cell tolerance induction	12	4	1.67	0.02933
GO:0048702	embryonic neurocranium morphogenesis	23	7	3.19	0.02939
GO:0051216	cartilage development	832	116	115.55	0.02949
GO:0034243	regulation of transcription elongation from RNA polymerase II promoter	59	3	8.19	0.02954
GO:0042089	cytokine biosynthetic process	35	6	4.86	0.02954
GO:0042107	cytokine metabolic process	35	6	4.86	0.02954
GO:0006614	SRP-dependent cotranslational protein targeting to membrane	8	3	1.11	0.02966
GO:0060996	dendritic spine development	169	34	23.47	0.02977
GO:0051258	protein polymerization	308	42	42.77	0.02982
GO:0006760	folic acid-containing compound metabolic process	23	9	3.19	0.02988
GO:0043123	positive regulation of I-kappaB kinase/NF-kappaB signaling	121	15	16.8	0.02992
GO:0048844	artery morphogenesis	246	40	34.16	0.03021
GO:0042311	vasodilation	42	7	5.83	0.03024
GO:0048546	digestive tract morphogenesis	344	65	47.77	0.03026
GO:0043401	steroid hormone mediated signaling pathway	183	37	25.41	0.03044
GO:0090287	regulation of cellular response to growth factor stimulus	328	60	45.55	0.03049
GO:0032784	regulation of DNA-templated transcription, elongation	79	7	10.97	0.03052
GO:0030575	nuclear body organization	7	1	0.97	0.03054
GO:0030576	Cajal body organization	7	1	0.97	0.03054
GO:0030219	megakaryocyte differentiation	27	3	3.75	0.03067
GO:0031122	cytoplasmic microtubule organization	35	6	4.86	0.03072
GO:0046578	regulation of Ras protein signal transduction	796	123	110.55	0.03078
GO:0043087	regulation of GTPase activity	672	103	93.33	0.03078
GO:0033124	regulation of GTP catabolic process	672	103	93.33	0.03078
GO:0016102	diterpenoid biosynthetic process	34	1	4.72	0.03106
GO:0033339	pectoral fin development	340	60	47.22	0.03107
GO:0018904	ether metabolic process	46	10	6.39	0.0311
GO:0006662	glycerol ether metabolic process	46	10	6.39	0.0311
GO:0034154	toll-like receptor 7 signaling pathway	81	15	11.25	0.03119
GO:0043407	negative regulation of MAP kinase activity	63	17	8.75	0.03137
GO:0043414	macromolecule methylation	290	34	40.27	0.03143
GO:0009142	nucleoside triphosphate biosynthetic process	65	17	9.03	0.03143
GO:0045061	thymic T cell selection	9	2	1.25	0.03144
GO:0046653	tetrahydrofolate metabolic process	13	5	1.81	0.03153
GO:0032535	regulation of cellular component size	449	73	62.36	0.03157
GO:0050708	regulation of protein secretion	60	12	8.33	0.03167
GO:0030916	otic vesicle formation	204	27	28.33	0.03168
GO:0006879	cellular iron ion homeostasis	42	8	5.83	0.03173
GO:0060512	prostate gland morphogenesis	99	35	13.75	0.03195
GO:0006575	cellular modified amino acid metabolic process	113	27	15.69	0.03205
GO:0072330	monocarboxylic acid biosynthetic process	154	29	21.39	0.03209
GO:0007167	enzyme linked receptor protein signaling pathway	2147	313	298.17	0.0322
GO:0035405	histone-threonine phosphorylation	50	4	6.94	0.03225
GO:0070365	hepatocyte differentiation	14	0	1.94	0.03229
GO:0045773	positive regulation of axon extension	43	8	5.97	0.03238
GO:0060019	radial glial cell differentiation	74	17	10.28	0.03241
GO:0060563	neuroepithelial cell differentiation	179	36	24.86	0.03247
GO:0003341	cilium movement	51	9	7.08	0.03261
GO:0008652	cellular amino acid biosynthetic process	119	26	16.53	0.03267
GO:0090183	regulation of kidney development	163	29	22.64	0.03281
GO:2000677	regulation of transcription regulatory region DNA binding	9	3	1.25	0.03293
GO:0045766	positive regulation of angiogenesis	58	6	8.05	0.03294
GO:0060028	convergent extension involved in axis elongation	100	12	13.89	0.03331
GO:0060119	inner ear receptor cell development	104	18	14.44	0.03334
GO:0022900	electron transport chain	51	14	7.08	0.03359
GO:0048675	axon extension	422	72	58.61	0.03386
GO:1990138	neuron projection extension	422	72	58.61	0.03386
GO:0009651	response to salt stress	34	11	4.72	0.03416
GO:0006188	IMP biosynthetic process	21	0	2.92	0.03419
GO:0032350	regulation of hormone metabolic process	75	9	10.42	0.03431
GO:0050900	leukocyte migration	112	26	15.55	0.03431
GO:0016049	cell growth	742	110	103.05	0.03459
GO:0050864	regulation of B cell activation	33	7	4.58	0.03466
GO:0036342	post-anal tail morphogenesis	121	13	16.8	0.03478
GO:0009719	response to endogenous stimulus	1706	240	236.92	0.03483
GO:0048608	reproductive structure development	632	125	87.77	0.03504
GO:0061458	reproductive system development	632	125	87.77	0.03504
GO:0002687	positive regulation of leukocyte migration	7	3	0.97	0.03516
GO:0009084	glutamine family amino acid biosynthetic process	22	6	3.06	0.03532
GO:0072576	liver morphogenesis	89	17	12.36	0.03554
GO:0070571	negative regulation of neuron projection regeneration	111	19	15.42	0.03564
GO:0048681	negative regulation of axon regeneration	111	19	15.42	0.03564
GO:0006487	protein N-linked glycosylation	29	8	4.03	0.0359
GO:0010518	positive regulation of phospholipase activity	34	11	4.72	0.03605
GO:0060193	positive regulation of lipase activity	34	11	4.72	0.03605
GO:0070570	regulation of neuron projection regeneration	114	19	15.83	0.03618
GO:0048679	regulation of axon regeneration	114	19	15.83	0.03618
GO:0006687	glycosphingolipid metabolic process	41	7	5.69	0.0363
GO:0010817	regulation of hormone levels	487	71	67.63	0.03634
GO:0046827	positive regulation of protein export from nucleus	8	0	1.11	0.03653
GO:0002449	lymphocyte mediated immunity	45	7	6.25	0.03659
GO:0000726	non-recombinational repair	21	2	2.92	0.03666
GO:0006303	double-strand break repair via nonhomologous end joining	21	2	2.92	0.03666
GO:0006928	cellular component movement	3946	542	548.01	0.03675
GO:0061326	renal tubule development	357	59	49.58	0.03678
GO:0016925	protein sumoylation	73	14	10.14	0.0368
GO:0045621	positive regulation of lymphocyte differentiation	22	3	3.06	0.03686
GO:0002200	somatic diversification of immune receptors	53	2	7.36	0.03692
GO:0006508	proteolysis	1912	312	265.53	0.03693
GO:0016444	somatic cell DNA recombination	49	2	6.8	0.03698
GO:0055002	striated muscle cell development	788	91	109.43	0.03698
GO:0072676	lymphocyte migration	17	5	2.36	0.03706
GO:0050926	regulation of positive chemotaxis	9	5	1.25	0.0371
GO:0050927	positive regulation of positive chemotaxis	9	5	1.25	0.0371
GO:0002279	mast cell activation involved in immune response	6	3	0.83	0.03717
GO:0021987	cerebral cortex development	62	9	8.61	0.0372
GO:0048639	positive regulation of developmental growth	105	17	14.58	0.03732
GO:0071322	cellular response to carbohydrate stimulus	10	2	1.39	0.03732
GO:0006629	lipid metabolic process	1194	203	165.82	0.03744
GO:0014812	muscle cell migration	16	2	2.22	0.03747
GO:0048145	regulation of fibroblast proliferation	24	7	3.33	0.03754
GO:0060486	Clara cell differentiation	6	1	0.83	0.03785
GO:0009755	hormone-mediated signaling pathway	203	37	28.19	0.03802
GO:0055024	regulation of cardiac muscle tissue development	76	20	10.55	0.0383
GO:0031060	regulation of histone methylation	25	3	3.47	0.03831
GO:0007039	protein catabolic process in the vacuole	6	0	0.83	0.03833
GO:0060775	planar cell polarity pathway involved in gastrula mediolateral intercalation	6	0	0.83	0.03833
GO:0001649	osteoblast differentiation	166	27	23.05	0.03883
GO:0032785	negative regulation of DNA-templated transcription, elongation	7	0	0.97	0.03886
GO:0034244	negative regulation of transcription elongation from RNA polymerase II promoter	7	0	0.97	0.03886
GO:0045620	negative regulation of lymphocyte differentiation	19	4	2.64	0.03896
GO:0021510	spinal cord development	724	114	100.55	0.03905
GO:0007266	Rho protein signal transduction	501	78	69.58	0.03921
GO:0090004	positive regulation of establishment of protein localization to plasma membrane	20	8	2.78	0.03931
GO:0034142	toll-like receptor 4 signaling pathway	89	16	12.36	0.0394
GO:0046916	cellular transition metal ion homeostasis	77	17	10.69	0.03956
GO:0040036	regulation of fibroblast growth factor receptor signaling pathway	185	30	25.69	0.03956
GO:0032474	otolith morphogenesis	67	13	9.3	0.03959
GO:0006611	protein export from nucleus	28	2	3.89	0.0396
GO:0042462	eye photoreceptor cell development	84	17	11.67	0.03993
GO:0048754	branching morphogenesis of an epithelial tube	458	66	63.61	0.03996
GO:0045581	negative regulation of T cell differentiation	17	4	2.36	0.03998
GO:0001973	adenosine receptor signaling pathway	40	13	5.56	0.04015
GO:0006412	translation	1015	137	140.96	0.04023
GO:0010566	regulation of ketone biosynthetic process	14	1	1.94	0.04037
GO:0043297	apical junction assembly	51	10	7.08	0.04038
GO:0060595	fibroblast growth factor receptor signaling pathway involved in mammary gland specification	10	5	1.39	0.04062
GO:0060615	mammary gland bud formation	10	5	1.39	0.04062
GO:0060648	mammary gland bud morphogenesis	10	5	1.39	0.04062
GO:0044033	multi-organism metabolic process	6	2	0.83	0.04064
GO:0052312	modulation of transcription in other organism involved in symbiotic interaction	6	2	0.83	0.04064
GO:0052472	modulation by host of symbiont transcription	6	2	0.83	0.04064
GO:0051702	interaction with symbiont	6	2	0.83	0.04064
GO:0051851	modification by host of symbiont morphology or physiology	6	2	0.83	0.04064
GO:0046782	regulation of viral transcription	6	2	0.83	0.04064
GO:0050434	positive regulation of viral transcription	6	2	0.83	0.04064
GO:0043921	modulation by host of viral transcription	6	2	0.83	0.04064
GO:0043923	positive regulation by host of viral transcription	6	2	0.83	0.04064
GO:0019080	viral gene expression	6	2	0.83	0.04064
GO:0019083	viral transcription	6	2	0.83	0.04064
GO:0046939	nucleotide phosphorylation	21	6	2.92	0.04075
GO:0051224	negative regulation of protein transport	47	13	6.53	0.04086
GO:0032024	positive regulation of insulin secretion	11	5	1.53	0.04086
GO:0021757	caudate nucleus development	10	1	1.39	0.04104
GO:0021758	putamen development	10	1	1.39	0.04104
GO:0031102	neuron projection regeneration	154	24	21.39	0.04107
GO:0010595	positive regulation of endothelial cell migration	46	8	6.39	0.04108
GO:0061180	mammary gland epithelium development	65	11	9.03	0.04119
GO:0001819	positive regulation of cytokine production	78	16	10.83	0.04136
GO:0035408	histone H3-T6 phosphorylation	48	4	6.67	0.04163
GO:0002429	immune response-activating cell surface receptor signaling pathway	115	21	15.97	0.04165
GO:0061448	connective tissue development	916	123	127.21	0.0419
GO:0042036	negative regulation of cytokine biosynthetic process	20	4	2.78	0.0421
GO:0060174	limb bud formation	42	8	5.83	0.04211
GO:0035775	pronephric glomerulus morphogenesis	12	6	1.67	0.0422
GO:0045648	positive regulation of erythrocyte differentiation	41	7	5.69	0.04229
GO:0008078	mesodermal cell migration	69	8	9.58	0.0423
GO:0030282	bone mineralization	144	18	20	0.04231
GO:1901800	positive regulation of proteasomal protein catabolic process	27	4	3.75	0.04257
GO:1903052	positive regulation of proteolysis involved in cellular protein catabolic process	27	4	3.75	0.04257
GO:0050853	B cell receptor signaling pathway	80	13	11.11	0.04279
GO:0015980	energy derivation by oxidation of organic compounds	129	27	17.92	0.04283
GO:2000725	regulation of cardiac muscle cell differentiation	7	2	0.97	0.04285
GO:2000727	positive regulation of cardiac muscle cell differentiation	7	2	0.97	0.04285
GO:0044042	glucan metabolic process	71	8	9.86	0.04295
GO:0005977	glycogen metabolic process	71	8	9.86	0.04295
GO:0006073	cellular glucan metabolic process	71	8	9.86	0.04295
GO:0006112	energy reserve metabolic process	71	8	9.86	0.04295
GO:0060034	notochord cell differentiation	70	19	9.72	0.04311
GO:0048486	parasympathetic nervous system development	10	1	1.39	0.04336
GO:0018212	peptidyl-tyrosine modification	284	51	39.44	0.04338
GO:0051046	regulation of secretion	413	58	57.36	0.0434
GO:0009062	fatty acid catabolic process	20	8	2.78	0.04343
GO:0006477	protein sulfation	6	1	0.83	0.04372
GO:0006478	peptidyl-tyrosine sulfation	6	1	0.83	0.04372
GO:0051923	sulfation	6	1	0.83	0.04372
GO:0002507	tolerance induction	19	6	2.64	0.04373
GO:0002643	regulation of tolerance induction	19	6	2.64	0.04373
GO:0002645	positive regulation of tolerance induction	19	6	2.64	0.04373
GO:0014070	response to organic cyclic compound	489	89	67.91	0.04379
GO:0009653	anatomical structure morphogenesis	9713	1384	1348.91	0.04395
GO:0043368	positive T cell selection	11	4	1.53	0.04416
GO:0043966	histone H3 acetylation	16	2	2.22	0.04418
GO:0051148	negative regulation of muscle cell differentiation	28	9	3.89	0.04432
GO:0010941	regulation of cell death	1482	236	205.82	0.04438
GO:0035113	embryonic appendage morphogenesis	418	52	58.05	0.04441
GO:0035419	activation of MAPK activity involved in innate immune response	79	14	10.97	0.04448
GO:0035682	toll-like receptor 21 signaling pathway	79	14	10.97	0.04448
GO:0006098	pentose-phosphate shunt	14	5	1.94	0.04463
GO:0006007	glucose catabolic process	14	5	1.94	0.04463
GO:0006740	NADPH regeneration	14	5	1.94	0.04463
GO:0003347	epicardial cell to mesenchymal cell transition	31	10	4.31	0.04464
GO:1901342	regulation of vasculature development	213	32	29.58	0.04464
GO:0061072	iris morphogenesis	57	5	7.92	0.04469
GO:0014065	phosphatidylinositol 3-kinase signaling	47	5	6.53	0.04472
GO:0046530	photoreceptor cell differentiation	268	33	37.22	0.04475
GO:0033559	unsaturated fatty acid metabolic process	40	11	5.56	0.04485
GO:0048515	spermatid differentiation	54	10	7.5	0.04492
GO:0045321	leukocyte activation	667	119	92.63	0.04527
GO:0021589	cerebellum structural organization	8	4	1.11	0.04573
GO:0021577	hindbrain structural organization	8	4	1.11	0.04573
GO:0006983	ER overload response	8	4	1.11	0.04573
GO:0006987	activation of signaling protein activity involved in unfolded protein response	8	4	1.11	0.04573
GO:0002262	myeloid cell homeostasis	419	56	58.19	0.04582
GO:0051123	RNA polymerase II transcriptional preinitiation complex assembly	17	5	2.36	0.04584
GO:0070897	DNA-templated transcriptional preinitiation complex assembly	17	5	2.36	0.04584
GO:0045046	protein import into peroxisome membrane	9	2	1.25	0.04593
GO:0015919	peroxisomal membrane transport	9	2	1.25	0.04593
GO:0072088	nephron epithelium morphogenesis	141	22	19.58	0.04619
GO:0042476	odontogenesis	142	24	19.72	0.04627
GO:0000070	mitotic sister chromatid segregation	51	4	7.08	0.04629
GO:0035023	regulation of Rho protein signal transduction	487	78	67.63	0.04635
GO:0007143	female meiotic division	96	22	13.33	0.0464
GO:0042130	negative regulation of T cell proliferation	13	4	1.81	0.04676
GO:0009886	post-embryonic morphogenesis	23	4	3.19	0.04676
GO:0043001	Golgi to plasma membrane protein transport	65	10	9.03	0.0469
GO:0060411	cardiac septum morphogenesis	99	25	13.75	0.04693
GO:0035143	caudal fin morphogenesis	64	5	8.89	0.04699
GO:0050931	pigment cell differentiation	227	45	31.53	0.04709
GO:1901797	negative regulation of signal transduction by p53 class mediator	11	3	1.53	0.04737
GO:0060688	regulation of morphogenesis of a branching structure	65	19	9.03	0.04747
GO:0021517	ventral spinal cord development	483	75	67.08	0.04763
GO:0042445	hormone metabolic process	198	23	27.5	0.04785
GO:0043604	amide biosynthetic process	27	4	3.75	0.04791
GO:0050730	regulation of peptidyl-tyrosine phosphorylation	139	25	19.3	0.04791
GO:0006520	cellular amino acid metabolic process	383	95	53.19	0.04797
GO:0007249	I-kappaB kinase/NF-kappaB signaling	153	24	21.25	0.04799
GO:0006984	ER-nucleus signaling pathway	45	13	6.25	0.0481
GO:0042113	B cell activation	182	23	25.28	0.04831
GO:0046854	phosphatidylinositol phosphorylation	91	14	12.64	0.04832
GO:0046834	lipid phosphorylation	91	14	12.64	0.04832
GO:0006561	proline biosynthetic process	8	4	1.11	0.04863
GO:0002923	regulation of humoral immune response mediated by circulating immunoglobulin	10	4	1.39	0.0487
GO:0002924	negative regulation of humoral immune response mediated by circulating immunoglobulin	10	4	1.39	0.0487
GO:0033085	negative regulation of T cell differentiation in thymus	10	4	1.39	0.0487
GO:0045409	negative regulation of interleukin-6 biosynthetic process	10	4	1.39	0.0487
GO:0002713	negative regulation of B cell mediated immunity	10	4	1.39	0.0487
GO:0002704	negative regulation of leukocyte mediated immunity	10	4	1.39	0.0487
GO:0002707	negative regulation of lymphocyte mediated immunity	10	4	1.39	0.0487
GO:0002890	negative regulation of immunoglobulin mediated immune response	10	4	1.39	0.0487
GO:0002895	regulation of central B cell tolerance induction	10	4	1.39	0.0487
GO:0002897	positive regulation of central B cell tolerance induction	10	4	1.39	0.0487
GO:0002510	central B cell tolerance induction	10	4	1.39	0.0487
GO:0002508	central tolerance induction	10	4	1.39	0.0487
GO:0002646	regulation of central tolerance induction	10	4	1.39	0.0487
GO:0002648	positive regulation of central tolerance induction	10	4	1.39	0.0487
GO:0002634	regulation of germinal center formation	10	4	1.39	0.0487
GO:0002635	negative regulation of germinal center formation	10	4	1.39	0.0487
GO:2000223	regulation of BMP signaling pathway involved in heart jogging	62	8	8.61	0.04908
GO:0044030	regulation of DNA methylation	25	9	3.47	0.04919
GO:0032415	regulation of sodium:proton antiporter activity	9	1	1.25	0.04928
GO:0071453	cellular response to oxygen levels	20	7	2.78	0.04941
GO:0031396	regulation of protein ubiquitination	129	23	17.92	0.04943
GO:0031547	brain-derived neurotrophic factor receptor signaling pathway	16	2	2.22	0.04954
GO:1990090	cellular response to nerve growth factor stimulus	10	2	1.39	0.0496
GO:1990089	response to nerve growth factor	10	2	1.39	0.0496
GO:0038180	nerve growth factor signaling pathway	10	2	1.39	0.0496
GO:0042573	retinoic acid metabolic process	49	4	6.8	0.04962
GO:0046685	response to arsenic-containing substance	29	9	4.03	0.04963
GO:0015669	gas transport	36	4	5	0.04992
GO:0051048	negative regulation of secretion	55	11	7.64	0.04998
GO:0060323	head morphogenesis	123	17	17.08	0.05022
GO:0032366	intracellular sterol transport	7	1	0.97	0.05033
GO:0032367	intracellular cholesterol transport	7	1	0.97	0.05033
GO:0072196	proximal/distal pattern formation involved in pronephric nephron development	122	20	16.94	0.05033
GO:2001233	regulation of apoptotic signaling pathway	117	22	16.25	0.0505
GO:0031076	embryonic camera-type eye development	320	46	44.44	0.05055
GO:0051056	regulation of small GTPase mediated signal transduction	907	142	125.96	0.0506
GO:0048598	embryonic morphogenesis	4027	537	559.26	0.05106
GO:0072595	maintenance of protein localization in organelle	12	1	1.67	0.0511
GO:0002327	immature B cell differentiation	13	3	1.81	0.05125
GO:0009124	nucleoside monophosphate biosynthetic process	114	18	15.83	0.05127
GO:0070664	negative regulation of leukocyte proliferation	15	5	2.08	0.0513
GO:0050672	negative regulation of lymphocyte proliferation	15	5	2.08	0.0513
GO:0032945	negative regulation of mononuclear cell proliferation	15	5	2.08	0.0513
GO:0051084	'de novo' posttranslational protein folding	33	10	4.58	0.05166
GO:0006458	'de novo' protein folding	33	10	4.58	0.05166
GO:0003002	regionalization	2502	354	347.47	0.05175
GO:0061136	regulation of proteasomal protein catabolic process	78	17	10.83	0.05179
GO:0021531	spinal cord radial glial cell differentiation	53	13	7.36	0.05183
GO:0039019	pronephric nephron development	314	49	43.61	0.05187
GO:0046395	carboxylic acid catabolic process	103	24	14.3	0.05196
GO:0016054	organic acid catabolic process	103	24	14.3	0.05196
GO:0010992	ubiquitin homeostasis	8	1	1.11	0.05198
GO:0043584	nose development	54	1	7.5	0.05201
GO:0030073	insulin secretion	63	13	8.75	0.05207
GO:0051145	smooth muscle cell differentiation	53	13	7.36	0.0521
GO:0051091	positive regulation of sequence-specific DNA binding transcription factor activity	193	26	26.8	0.05223
GO:0030833	regulation of actin filament polymerization	165	27	22.91	0.0523
GO:0090087	regulation of peptide transport	62	11	8.61	0.0523
GO:0002791	regulation of peptide secretion	62	11	8.61	0.0523
GO:0090276	regulation of peptide hormone secretion	62	11	8.61	0.0523
GO:0061298	retina vasculature development in camera-type eye	23	7	3.19	0.05243
GO:1901978	positive regulation of cell cycle checkpoint	7	0	0.97	0.05249
GO:0090266	regulation of mitotic cell cycle spindle assembly checkpoint	7	0	0.97	0.05249
GO:0090267	positive regulation of mitotic cell cycle spindle assembly checkpoint	7	0	0.97	0.05249
GO:0090232	positive regulation of spindle checkpoint	7	0	0.97	0.05249
GO:0006354	DNA-templated transcription, elongation	91	7	12.64	0.05257
GO:0033336	caudal fin development	66	5	9.17	0.05263
GO:0002696	positive regulation of leukocyte activation	115	26	15.97	0.05281
GO:0046459	short-chain fatty acid metabolic process	9	4	1.25	0.05286
GO:0032103	positive regulation of response to external stimulus	29	8	4.03	0.05345
GO:0035428	hexose transmembrane transport	7	4	0.97	0.05369
GO:0060462	lung lobe development	22	6	3.06	0.05371
GO:0060463	lung lobe morphogenesis	22	6	3.06	0.05371
GO:0060348	bone development	243	40	33.75	0.05373
GO:2000114	regulation of establishment of cell polarity	15	3	2.08	0.054
GO:0007005	mitochondrion organization	157	26	21.8	0.05403
GO:0035239	tube morphogenesis	1419	189	197.07	0.05408
GO:0018209	peptidyl-serine modification	233	39	32.36	0.05422
GO:0060729	intestinal epithelial structure maintenance	29	3	4.03	0.05425
GO:0003188	heart valve formation	53	13	7.36	0.05434
GO:0007586	digestion	62	8	8.61	0.05446
GO:0035282	segmentation	990	144	137.49	0.05446
GO:0002138	retinoic acid biosynthetic process	32	1	4.44	0.05471
GO:0006026	aminoglycan catabolic process	13	2	1.81	0.05481
GO:0009303	rRNA transcription	6	3	0.83	0.05502
GO:0051782	negative regulation of cell division	13	3	1.81	0.05517
GO:0072191	ureter smooth muscle development	7	2	0.97	0.05547
GO:0072193	ureter smooth muscle cell differentiation	7	2	0.97	0.05547
GO:0034721	histone H3-K4 demethylation, trimethyl-H3-K4-specific	10	0	1.39	0.05555
GO:0051150	regulation of smooth muscle cell differentiation	27	9	3.75	0.05592
GO:0019229	regulation of vasoconstriction	22	7	3.06	0.05606
GO:0001893	maternal placenta development	13	6	1.81	0.05611
GO:0009956	radial pattern formation	13	6	1.81	0.05611
GO:0060849	regulation of transcription involved in lymphatic endothelial cell fate commitment	13	6	1.81	0.05611
GO:0060838	lymphatic endothelial cell fate commitment	13	6	1.81	0.05611
GO:0009988	cell-cell recognition	95	19	13.19	0.05628
GO:0006563	L-serine metabolic process	11	4	1.53	0.05642
GO:0010876	lipid localization	256	44	35.55	0.0565
GO:0032984	macromolecular complex disassembly	157	21	21.8	0.0566
GO:0055014	atrial cardiac muscle cell development	117	3	16.25	0.05663
GO:0018107	peptidyl-threonine phosphorylation	105	8	14.58	0.05666
GO:0018210	peptidyl-threonine modification	105	8	14.58	0.05666
GO:0006749	glutathione metabolic process	18	4	2.5	0.05682
GO:0048678	response to axon injury	152	23	21.11	0.05693
GO:0031103	axon regeneration	152	23	21.11	0.05693
GO:0035441	cell migration involved in vasculogenesis	46	9	6.39	0.05708
GO:0055001	muscle cell development	806	92	111.93	0.0571
GO:0051301	cell division	1674	257	232.48	0.0571
GO:0048671	negative regulation of collateral sprouting	111	18	15.42	0.05719
GO:0045454	cell redox homeostasis	89	11	12.36	0.05725
GO:0035883	enteroendocrine cell differentiation	18	1	2.5	0.05726
GO:0055011	atrial cardiac muscle cell differentiation	132	3	18.33	0.05758
GO:0060314	regulation of ryanodine-sensitive calcium-release channel activity	8	3	1.11	0.05759
GO:0038093	Fc receptor signaling pathway	8	4	1.11	0.05759
GO:0060443	mammary gland morphogenesis	71	13	9.86	0.05762
GO:2000241	regulation of reproductive process	142	21	19.72	0.05765
GO:0001556	oocyte maturation	154	32	21.39	0.05777
GO:0030534	adult behavior	139	11	19.3	0.05787
GO:0035907	dorsal aorta development	12	4	1.67	0.05787
GO:0072028	nephron morphogenesis	200	25	27.78	0.0579
GO:0006457	protein folding	184	40	25.55	0.05805
GO:0060839	endothelial cell fate commitment	26	9	3.61	0.0581
GO:0043473	pigmentation	522	99	72.49	0.05815
GO:0090130	tissue migration	399	75	55.41	0.05837
GO:0050921	positive regulation of chemotaxis	16	5	2.22	0.05838
GO:0048520	positive regulation of behavior	16	5	2.22	0.05838
GO:0001933	negative regulation of protein phosphorylation	133	33	18.47	0.05841
GO:0032314	regulation of Rac GTPase activity	114	15	15.83	0.05844
GO:0035469	determination of pancreatic left/right asymmetry	77	19	10.69	0.05856
GO:0036294	cellular response to decreased oxygen levels	15	5	2.08	0.05859
GO:0071456	cellular response to hypoxia	15	5	2.08	0.05859
GO:0043067	regulation of programmed cell death	1449	229	201.23	0.05862
GO:0002934	desmosome organization	8	3	1.11	0.05867
GO:0043500	muscle adaptation	20	6	2.78	0.0587
GO:0017156	calcium ion-dependent exocytosis	25	4	3.47	0.0588
GO:0043049	otic placode formation	163	19	22.64	0.0588
GO:0017014	protein nitrosylation	6	3	0.83	0.05941
GO:0018119	peptidyl-cysteine S-nitrosylation	6	3	0.83	0.05941
GO:0035590	purinergic nucleotide receptor signaling pathway	52	10	7.22	0.05943
GO:0051302	regulation of cell division	283	49	39.3	0.05987
GO:0048532	anatomical structure arrangement	12	5	1.67	0.05988
GO:0051705	multi-organism behavior	79	14	10.97	0.06015
GO:0010517	regulation of phospholipase activity	37	12	5.14	0.06029
GO:0035474	selective angioblast sprouting	58	16	8.05	0.0603
GO:0034101	erythrocyte homeostasis	417	54	57.91	0.06032
GO:0010831	positive regulation of myotube differentiation	8	3	1.11	0.06036
GO:0042994	cytoplasmic sequestering of transcription factor	8	3	1.11	0.06036
GO:0045924	regulation of female receptivity	8	3	1.11	0.06036
GO:0045925	positive regulation of female receptivity	8	3	1.11	0.06036
GO:0060180	female mating behavior	8	3	1.11	0.06036
GO:0044705	multi-organism reproductive behavior	8	3	1.11	0.06036
GO:0007617	mating behavior	8	3	1.11	0.06036
GO:0007619	courtship behavior	8	3	1.11	0.06036
GO:0002154	thyroid hormone mediated signaling pathway	8	3	1.11	0.06036
GO:0002155	regulation of thyroid hormone mediated signaling pathway	8	3	1.11	0.06036
GO:0033057	multicellular organismal reproductive behavior	8	3	1.11	0.06036
GO:0008050	female courtship behavior	8	3	1.11	0.06036
GO:0019098	reproductive behavior	8	3	1.11	0.06036
GO:0043069	negative regulation of programmed cell death	579	99	80.41	0.06042
GO:0043410	positive regulation of MAPK cascade	556	95	77.22	0.06049
GO:0000041	transition metal ion transport	111	29	15.42	0.06052
GO:0071495	cellular response to endogenous stimulus	1461	214	202.9	0.06058
GO:0043409	negative regulation of MAPK cascade	110	21	15.28	0.06068
GO:0009607	response to biotic stimulus	432	93	59.99	0.06076
GO:0044272	sulfur compound biosynthetic process	130	15	18.05	0.06099
GO:0032467	positive regulation of cytokinesis	52	14	7.22	0.06103
GO:0009952	anterior/posterior pattern specification	1595	225	221.51	0.06104
GO:0001736	establishment of planar polarity	152	17	21.11	0.06113
GO:0007164	establishment of tissue polarity	152	17	21.11	0.06113
GO:0010564	regulation of cell cycle process	431	79	59.86	0.06116
GO:0001501	skeletal system development	1524	202	211.65	0.06117
GO:0007346	regulation of mitotic cell cycle	361	59	50.13	0.06118
GO:0051897	positive regulation of protein kinase B signaling	23	4	3.19	0.06118
GO:0044092	negative regulation of molecular function	765	123	106.24	0.06138
GO:0030036	actin cytoskeleton organization	1151	166	159.85	0.06159
GO:0048872	homeostasis of number of cells	464	67	64.44	0.06162
GO:0010669	epithelial structure maintenance	37	4	5.14	0.06192
GO:0042522	regulation of tyrosine phosphorylation of Stat5 protein	8	4	1.11	0.06217
GO:0042506	tyrosine phosphorylation of Stat5 protein	8	4	1.11	0.06217
GO:0045956	positive regulation of calcium ion-dependent exocytosis	21	2	2.92	0.06227
GO:0017158	regulation of calcium ion-dependent exocytosis	21	2	2.92	0.06227
GO:0040016	embryonic cleavage	51	8	7.08	0.06239
GO:0071603	endothelial cell-cell adhesion	11	5	1.53	0.06239
GO:0003309	type B pancreatic cell differentiation	15	1	2.08	0.06242
GO:0014014	negative regulation of gliogenesis	68	7	9.44	0.06251
GO:0051090	regulation of sequence-specific DNA binding transcription factor activity	373	41	51.8	0.0626
GO:0010874	regulation of cholesterol efflux	11	3	1.53	0.06271
GO:0060030	dorsal convergence	92	11	12.78	0.06276
GO:0021872	forebrain generation of neurons	112	8	15.55	0.06277
GO:0032787	monocarboxylic acid metabolic process	377	98	52.36	0.06283
GO:0045822	negative regulation of heart contraction	31	4	4.31	0.06288
GO:0039007	pronephric nephron morphogenesis	106	17	14.72	0.06294
GO:0039008	pronephric nephron tubule morphogenesis	106	17	14.72	0.06294
GO:0002820	negative regulation of adaptive immune response	18	4	2.5	0.063
GO:0006541	glutamine metabolic process	42	9	5.83	0.06309
GO:0070201	regulation of establishment of protein localization	315	49	43.75	0.06322
GO:0001944	vasculature development	2455	379	340.94	0.06334
GO:0009112	nucleobase metabolic process	71	6	9.86	0.0634
GO:0010863	positive regulation of phospholipase C activity	28	9	3.89	0.06379
GO:1900274	regulation of phospholipase C activity	28	9	3.89	0.06379
GO:0042694	muscle cell fate specification	50	10	6.94	0.06384
GO:0007286	spermatid development	53	10	7.36	0.06385
GO:0019730	antimicrobial humoral response	6	2	0.83	0.06412
GO:0019731	antibacterial humoral response	6	2	0.83	0.06412
GO:0043152	induction of bacterial agglutination	6	2	0.83	0.06412
GO:0070670	response to interleukin-4	28	9	3.89	0.06424
GO:0071353	cellular response to interleukin-4	28	9	3.89	0.06424
GO:0010001	glial cell differentiation	626	101	86.94	0.06442
GO:0060840	artery development	263	42	36.52	0.06459
GO:0021879	forebrain neuron differentiation	102	7	14.17	0.0646
GO:0061303	cornea development in camera-type eye	54	5	7.5	0.06463
GO:0050771	negative regulation of axonogenesis	165	25	22.91	0.06465
GO:0030252	growth hormone secretion	16	0	2.22	0.0648
GO:0034644	cellular response to UV	25	8	3.47	0.06481
GO:0008544	epidermis development	394	58	54.72	0.06485
GO:0009437	carnitine metabolic process	7	4	0.97	0.06507
GO:0045329	carnitine biosynthetic process	7	4	0.97	0.06507
GO:0007029	endoplasmic reticulum organization	97	16	13.47	0.0651
GO:0046686	response to cadmium ion	38	7	5.28	0.06512
GO:0015833	peptide transport	102	17	14.17	0.06525
GO:0045762	positive regulation of adenylate cyclase activity	42	3	5.83	0.06525
GO:0006006	glucose metabolic process	129	32	17.92	0.06535
GO:0009309	amine biosynthetic process	12	5	1.67	0.0655
GO:0042401	cellular biogenic amine biosynthetic process	12	5	1.67	0.0655
GO:0006596	polyamine biosynthetic process	12	5	1.67	0.0655
GO:0016601	Rac protein signal transduction	166	27	23.05	0.06553
GO:0008344	adult locomotory behavior	62	4	8.61	0.06571
GO:0051220	cytoplasmic sequestering of protein	10	3	1.39	0.06576
GO:0033028	myeloid cell apoptotic process	10	4	1.39	0.06576
GO:0033032	regulation of myeloid cell apoptotic process	10	4	1.39	0.06576
GO:0006940	regulation of smooth muscle contraction	28	6	3.89	0.06578
GO:0034504	protein localization to nucleus	135	25	18.75	0.06597
GO:0009063	cellular amino acid catabolic process	69	11	9.58	0.06599
GO:0007620	copulation	9	3	1.25	0.06612
GO:0030072	peptide hormone secretion	83	14	11.53	0.06613
GO:0002790	peptide secretion	83	14	11.53	0.06613
GO:0000185	activation of MAPKKK activity	6	0	0.83	0.06624
GO:0060841	venous blood vessel development	65	15	9.03	0.06626
GO:0001817	regulation of cytokine production	202	27	28.05	0.06629
GO:0034146	toll-like receptor 5 signaling pathway	83	15	11.53	0.06633
GO:0034620	cellular response to unfolded protein	21	8	2.92	0.06635
GO:0030968	endoplasmic reticulum unfolded protein response	21	8	2.92	0.06635
GO:0010977	negative regulation of neuron projection development	137	23	19.03	0.06636
GO:0001569	patterning of blood vessels	217	32	30.14	0.06649
GO:0001824	blastocyst development	31	8	4.31	0.06657
GO:0001516	prostaglandin biosynthetic process	19	7	2.64	0.06661
GO:0046457	prostanoid biosynthetic process	19	7	2.64	0.06661
GO:0006692	prostanoid metabolic process	19	7	2.64	0.06661
GO:0006693	prostaglandin metabolic process	19	7	2.64	0.06661
GO:0009156	ribonucleoside monophosphate biosynthetic process	111	17	15.42	0.06686
GO:0060449	bud elongation involved in lung branching	15	6	2.08	0.06692
GO:0060529	squamous basal epithelial stem cell differentiation involved in prostate gland acinus development	15	6	2.08	0.06692
GO:0060667	branch elongation involved in salivary gland morphogenesis	15	6	2.08	0.06692
GO:0060915	mesenchymal cell differentiation involved in lung development	15	6	2.08	0.06692
GO:0043631	RNA polyadenylation	37	4	5.14	0.06699
GO:0007628	adult walking behavior	51	4	7.08	0.06718
GO:0032459	regulation of protein oligomerization	21	5	2.92	0.06727
GO:0007169	transmembrane receptor protein tyrosine kinase signaling pathway	1407	219	195.4	0.06739
GO:0043249	erythrocyte maturation	28	7	3.89	0.06766
GO:0021798	forebrain dorsal/ventral pattern formation	9	1	1.25	0.06769
GO:0006835	dicarboxylic acid transport	40	2	5.56	0.06772
GO:0031345	negative regulation of cell projection organization	201	29	27.91	0.06772
GO:0071229	cellular response to acid chemical	161	35	22.36	0.06788
GO:0043491	protein kinase B signaling	77	11	10.69	0.0683
GO:0001909	leukocyte mediated cytotoxicity	8	3	1.11	0.06834
GO:0051103	DNA ligation involved in DNA repair	14	0	1.94	0.06842
GO:0033120	positive regulation of RNA splicing	34	3	4.72	0.06843
GO:0001655	urogenital system development	1579	237	219.29	0.06851
GO:0046649	lymphocyte activation	616	97	85.55	0.06861
GO:0060674	placenta blood vessel development	25	9	3.47	0.06887
GO:0051817	modification of morphology or physiology of other organism involved in symbiotic interaction	35	6	4.86	0.06914
GO:0043241	protein complex disassembly	155	19	21.53	0.06949
GO:0006766	vitamin metabolic process	61	5	8.47	0.06954
GO:0048794	swim bladder development	91	13	12.64	0.06982
GO:0007548	sex differentiation	451	76	62.63	0.07018
GO:0048941	posterior lateral line nerve glial cell development	57	11	7.92	0.07019
GO:0048942	posterior lateral line nerve glial cell morphogenesis involved in differentiation	57	11	7.92	0.07019
GO:0048931	posterior lateral line nerve glial cell differentiation	57	11	7.92	0.07019
GO:0048932	myelination of posterior lateral line nerve axons	57	11	7.92	0.07019
GO:0016265	death	2144	309	297.75	0.07032
GO:0008219	cell death	2144	309	297.75	0.07032
GO:0071600	otic vesicle morphogenesis	226	28	31.39	0.07049
GO:0043534	blood vessel endothelial cell migration	84	17	11.67	0.07063
GO:0010466	negative regulation of peptidase activity	279	55	38.75	0.07071
GO:0009201	ribonucleoside triphosphate biosynthetic process	59	15	8.19	0.07076
GO:0051704	multi-organism process	1348	237	187.21	0.07099
GO:0072006	nephron development	494	73	68.61	0.07128
GO:0030218	erythrocyte differentiation	414	52	57.49	0.07136
GO:0030041	actin filament polymerization	171	27	23.75	0.07138
GO:0048683	regulation of collateral sprouting of intact axon in response to injury	99	18	13.75	0.07142
GO:0048685	negative regulation of collateral sprouting of intact axon in response to injury	99	18	13.75	0.07142
GO:0048673	collateral sprouting of intact axon in response to injury	99	18	13.75	0.07142
GO:1900052	regulation of retinoic acid biosynthetic process	27	0	3.75	0.07146
GO:0019747	regulation of isoprenoid metabolic process	27	0	3.75	0.07146
GO:0050920	regulation of chemotaxis	51	12	7.08	0.07158
GO:0001839	neural plate morphogenesis	44	5	6.11	0.07166
GO:0007420	brain development	2354	360	326.92	0.07167
GO:0050707	regulation of cytokine secretion	32	7	4.44	0.07178
GO:0043124	negative regulation of I-kappaB kinase/NF-kappaB signaling	9	2	1.25	0.07187
GO:0060041	retina development in camera-type eye	683	79	94.85	0.07263
GO:0042326	negative regulation of phosphorylation	184	41	25.55	0.07268
GO:0060117	auditory receptor cell development	79	14	10.97	0.07277
GO:0043066	negative regulation of apoptotic process	563	96	78.19	0.07305
GO:0051240	positive regulation of multicellular organismal process	494	69	68.61	0.07316
GO:0007160	cell-matrix adhesion	185	21	25.69	0.07324
GO:0006406	mRNA export from nucleus	19	0	2.64	0.0734
GO:0030832	regulation of actin filament length	168	27	23.33	0.07341
GO:0008064	regulation of actin polymerization or depolymerization	168	27	23.33	0.07341
GO:0030010	establishment of cell polarity	404	63	56.11	0.07365
GO:0060004	reflex	6	0	0.83	0.07366
GO:0002761	regulation of myeloid leukocyte differentiation	35	7	4.86	0.07382
GO:0050805	negative regulation of synaptic transmission	47	11	6.53	0.07404
GO:0005975	carbohydrate metabolic process	877	163	121.79	0.07411
GO:0001764	neuron migration	246	40	34.16	0.07425
GO:0070371	ERK1 and ERK2 cascade	183	34	25.41	0.07426
GO:0023014	signal transduction by phosphorylation	1087	191	150.96	0.07432
GO:0060977	coronary vasculature morphogenesis	38	8	5.28	0.07452
GO:0060526	prostate glandular acinus morphogenesis	20	6	2.78	0.07464
GO:0060527	prostate epithelial cord arborization involved in prostate glandular acinus morphogenesis	20	6	2.78	0.07464
GO:0001667	ameboidal-type cell migration	1097	158	152.35	0.07466
GO:0046364	monosaccharide biosynthetic process	93	26	12.92	0.07467
GO:0040011	locomotion	3493	501	485.1	0.07484
GO:0072527	pyrimidine-containing compound metabolic process	67	8	9.3	0.07487
GO:0045926	negative regulation of growth	277	36	38.47	0.07492
GO:0042537	benzene-containing compound metabolic process	10	3	1.39	0.075
GO:0071468	cellular response to acidic pH	6	1	0.83	0.07509
GO:0043406	positive regulation of MAP kinase activity	238	42	33.05	0.07537
GO:0045732	positive regulation of protein catabolic process	29	4	4.03	0.07539
GO:0006942	regulation of striated muscle contraction	57	12	7.92	0.07545
GO:0043588	skin development	449	69	62.36	0.07558
GO:0006869	lipid transport	248	43	34.44	0.07569
GO:0001558	regulation of cell growth	459	64	63.74	0.07579
GO:0019835	cytolysis	18	1	2.5	0.0759
GO:0048332	mesoderm morphogenesis	715	87	99.3	0.07602
GO:1901617	organic hydroxy compound biosynthetic process	122	18	16.94	0.07609
GO:0030855	epithelial cell differentiation	1276	190	177.21	0.07647
GO:0032411	positive regulation of transporter activity	39	6	5.42	0.07653
GO:0061333	renal tubule morphogenesis	131	22	18.19	0.07656
GO:0072078	nephron tubule morphogenesis	131	22	18.19	0.07656
GO:0060219	camera-type eye photoreceptor cell differentiation	109	12	15.14	0.07681
GO:0007188	adenylate cyclase-modulating G-protein coupled receptor signaling pathway	171	19	23.75	0.07693
GO:0046165	alcohol biosynthetic process	87	11	12.08	0.077
GO:0015849	organic acid transport	169	27	23.47	0.07703
GO:0000710	meiotic mismatch repair	11	0	1.53	0.07744
GO:0048668	collateral sprouting	130	21	18.05	0.07746
GO:0090263	positive regulation of canonical Wnt signaling pathway	130	21	18.05	0.07766
GO:0071786	endoplasmic reticulum tubular network organization	62	10	8.61	0.07788
GO:0097051	establishment of protein localization to endoplasmic reticulum membrane	62	10	8.61	0.07788
GO:0061467	basolateral protein localization	62	10	8.61	0.07788
GO:0035681	toll-like receptor 15 signaling pathway	82	14	11.39	0.0779
GO:0034134	toll-like receptor 2 signaling pathway	82	14	11.39	0.0779
GO:0007140	male meiosis	32	10	4.44	0.07794
GO:0007189	adenylate cyclase-activating G-protein coupled receptor signaling pathway	63	7	8.75	0.07817
GO:0032101	regulation of response to external stimulus	389	65	54.02	0.07831
GO:0002504	antigen processing and presentation of peptide or polysaccharide antigen via MHC class II	7	2	0.97	0.07885
GO:0032075	positive regulation of nuclease activity	11	5	1.53	0.07888
GO:0006839	mitochondrial transport	76	22	10.55	0.07907
GO:0051225	spindle assembly	227	33	31.53	0.07917
GO:0051604	protein maturation	213	31	29.58	0.07943
GO:0008582	regulation of synaptic growth at neuromuscular junction	11	2	1.53	0.07952
GO:0051124	synaptic growth at neuromuscular junction	11	2	1.53	0.07952
GO:0006954	inflammatory response	184	30	25.55	0.07958
GO:0000462	maturation of SSU-rRNA from tricistronic rRNA transcript (SSU-rRNA, 5.8S rRNA, LSU-rRNA)	14	1	1.94	0.07959
GO:0030490	maturation of SSU-rRNA	14	1	1.94	0.07959
GO:0006364	rRNA processing	92	9	12.78	0.07964
GO:0070534	protein K63-linked ubiquitination	34	2	4.72	0.07996
GO:0007219	Notch signaling pathway	435	71	60.41	0.08036
GO:0060707	trophoblast giant cell differentiation	14	6	1.94	0.08063
GO:2000145	regulation of cell motility	537	89	74.58	0.08068
GO:0072599	establishment of protein localization to endoplasmic reticulum	15	4	2.08	0.08084
GO:0045047	protein targeting to ER	15	4	2.08	0.08084
GO:0090184	positive regulation of kidney development	25	7	3.47	0.08097
GO:0010955	negative regulation of protein processing	55	9	7.64	0.08099
GO:1903318	negative regulation of protein maturation	55	9	7.64	0.08099
GO:0006368	transcription elongation from RNA polymerase II promoter	73	3	10.14	0.08117
GO:0019724	B cell mediated immunity	37	4	5.14	0.08147
GO:0016064	immunoglobulin mediated immune response	37	4	5.14	0.08147
GO:0072659	protein localization to plasma membrane	194	31	26.94	0.08162
GO:0030801	positive regulation of cyclic nucleotide metabolic process	103	14	14.3	0.08165
GO:0045981	positive regulation of nucleotide metabolic process	103	14	14.3	0.08165
GO:0001837	epithelial to mesenchymal transition	724	96	100.55	0.08181
GO:0007044	cell-substrate junction assembly	133	12	18.47	0.08184
GO:0045743	positive regulation of fibroblast growth factor receptor signaling pathway	135	15	18.75	0.08186
GO:0071698	olfactory placode development	50	1	6.94	0.082
GO:0048640	negative regulation of developmental growth	172	25	23.89	0.08211
GO:0051896	regulation of protein kinase B signaling	58	8	8.05	0.08211
GO:0060316	positive regulation of ryanodine-sensitive calcium-release channel activity	7	3	0.97	0.08228
GO:0051342	regulation of cyclic-nucleotide phosphodiesterase activity	7	3	0.97	0.08228
GO:0051343	positive regulation of cyclic-nucleotide phosphodiesterase activity	7	3	0.97	0.08228
GO:0005513	detection of calcium ion	7	3	0.97	0.08228
GO:0051707	response to other organism	411	87	57.08	0.08241
GO:0043207	response to external biotic stimulus	411	87	57.08	0.08241
GO:0009118	regulation of nucleoside metabolic process	728	112	101.1	0.08243
GO:0009262	deoxyribonucleotide metabolic process	10	3	1.39	0.08263
GO:0070444	oligodendrocyte progenitor proliferation	6	1	0.83	0.08318
GO:0050778	positive regulation of immune response	458	77	63.61	0.08326
GO:0055113	epiboly involved in gastrulation with mouth forming second	107	25	14.86	0.08347
GO:0007508	larval heart development	66	14	9.17	0.08373
GO:0002164	larval development	66	14	9.17	0.08373
GO:0002695	negative regulation of leukocyte activation	48	8	6.67	0.08383
GO:0007033	vacuole organization	78	21	10.83	0.08389
GO:0006900	membrane budding	39	3	5.42	0.08407
GO:1902221	erythrose 4-phosphate/phosphoenolpyruvate family amino acid metabolic process	6	3	0.83	0.0842
GO:1902222	erythrose 4-phosphate/phosphoenolpyruvate family amino acid catabolic process	6	3	0.83	0.0842
GO:0006558	L-phenylalanine metabolic process	6	3	0.83	0.0842
GO:0006559	L-phenylalanine catabolic process	6	3	0.83	0.0842
GO:0022411	cellular component disassembly	238	33	33.05	0.08425
GO:0010002	cardioblast differentiation	158	26	21.94	0.08444
GO:0021904	dorsal/ventral neural tube patterning	110	13	15.28	0.08446
GO:0070925	organelle assembly	1073	151	149.01	0.08456
GO:0042981	regulation of apoptotic process	1424	226	197.76	0.08471
GO:0007178	transmembrane receptor protein serine/threonine kinase signaling pathway	799	104	110.96	0.08473
GO:0002455	humoral immune response mediated by circulating immunoglobulin	15	4	2.08	0.08478
GO:0051149	positive regulation of muscle cell differentiation	37	9	5.14	0.08514
GO:0046823	negative regulation of nucleocytoplasmic transport	37	8	5.14	0.08514
GO:0060384	innervation	45	8	6.25	0.08522
GO:0048857	neural nucleus development	49	5	6.8	0.08533
GO:0033151	V(D)J recombination	23	1	3.19	0.08538
GO:0060113	inner ear receptor cell differentiation	207	38	28.75	0.08539
GO:0012501	programmed cell death	2081	301	289	0.08544
GO:0050790	regulation of catalytic activity	2799	451	388.72	0.08601
GO:0001672	regulation of chromatin assembly or disassembly	7	0	0.97	0.08601
GO:0045799	positive regulation of chromatin assembly or disassembly	7	0	0.97	0.08601
GO:0072594	establishment of protein localization to organelle	267	46	37.08	0.08612
GO:0022412	cellular process involved in reproduction in multicellular organism	528	86	73.33	0.08671
GO:0046683	response to organophosphorus	7	3	0.97	0.08675
GO:0035272	exocrine system development	294	48	40.83	0.08679
GO:0021783	preganglionic parasympathetic nervous system development	8	1	1.11	0.08686
GO:0030811	regulation of nucleotide catabolic process	727	111	100.96	0.08701
GO:0033121	regulation of purine nucleotide catabolic process	727	111	100.96	0.08701
GO:0001840	neural plate development	248	35	34.44	0.08704
GO:0010875	positive regulation of cholesterol efflux	6	1	0.83	0.08724
GO:0006000	fructose metabolic process	17	4	2.36	0.08767
GO:0006003	fructose 2,6-bisphosphate metabolic process	17	4	2.36	0.08767
GO:0070936	protein K48-linked ubiquitination	26	1	3.61	0.0879
GO:0050709	negative regulation of protein secretion	12	5	1.67	0.08801
GO:0002823	negative regulation of adaptive immune response based on somatic recombination of immune receptors built from immunoglobulin superfamily domains	17	4	2.36	0.08808
GO:0001755	neural crest cell migration	345	47	47.91	0.08809
GO:0002793	positive regulation of peptide secretion	14	5	1.94	0.0883
GO:0090277	positive regulation of peptide hormone secretion	14	5	1.94	0.0883
GO:0002444	myeloid leukocyte mediated immunity	19	7	2.64	0.0883
GO:0007431	salivary gland development	52	17	7.22	0.08853
GO:0007435	salivary gland morphogenesis	52	17	7.22	0.08853
GO:0060749	mammary gland alveolus development	11	3	1.53	0.08854
GO:0061377	mammary gland lobule development	11	3	1.53	0.08854
GO:0014031	mesenchymal cell development	1137	155	157.9	0.08873
GO:0048936	peripheral nervous system neuron axonogenesis	121	19	16.8	0.08874
GO:0006493	protein O-linked glycosylation	16	6	2.22	0.08895
GO:0035510	DNA dealkylation	10	0	1.39	0.08916
GO:0044275	cellular carbohydrate catabolic process	11	1	1.53	0.08916
GO:0031647	regulation of protein stability	125	10	17.36	0.08917
GO:0001822	kidney development	1317	184	182.9	0.08941
GO:0060070	canonical Wnt signaling pathway	580	80	80.55	0.08947
GO:0021903	rostrocaudal neural tube patterning	154	18	21.39	0.08976
GO:0044257	cellular protein catabolic process	640	112	88.88	0.0898
GO:0045667	regulation of osteoblast differentiation	99	13	13.75	0.08992
GO:0034138	toll-like receptor 3 signaling pathway	90	17	12.5	0.08998
GO:0035589	G-protein coupled purinergic nucleotide receptor signaling pathway	42	9	5.83	0.09
GO:0043987	histone H3-S10 phosphorylation	34	7	4.72	0.09029
GO:0010821	regulation of mitochondrion organization	47	6	6.53	0.09033
GO:0072001	renal system development	1401	191	194.57	0.09045
GO:0033136	serine phosphorylation of STAT3 protein	32	3	4.44	0.09051
GO:0042501	serine phosphorylation of STAT protein	32	3	4.44	0.09051
GO:0060326	cell chemotaxis	157	24	21.8	0.09071
GO:0009887	organ morphogenesis	3774	493	524.12	0.09071
GO:0016311	dephosphorylation	721	95	100.13	0.09074
GO:0035270	endocrine system development	658	76	91.38	0.09116
GO:0050776	regulation of immune response	624	103	86.66	0.09117
GO:0021571	rhombomere 5 development	11	3	1.53	0.09117
GO:0021572	rhombomere 6 development	11	3	1.53	0.09117
GO:0035020	regulation of Rac protein signal transduction	163	25	22.64	0.09121
GO:0003303	BMP signaling pathway involved in heart jogging	64	8	8.89	0.09131
GO:0003154	BMP signaling pathway involved in determination of left/right symmetry	64	8	8.89	0.09131
GO:0006691	leukotriene metabolic process	18	4	2.5	0.09131
GO:0000910	cytokinesis	319	61	44.3	0.09189
GO:0009074	aromatic amino acid family catabolic process	17	5	2.36	0.09201
GO:0060325	face morphogenesis	97	13	13.47	0.09201
GO:0001776	leukocyte homeostasis	7	3	0.97	0.09215
GO:0060916	mesenchymal cell proliferation involved in lung development	26	6	3.61	0.09244
GO:0070189	kynurenine metabolic process	7	2	0.97	0.09248
GO:0009306	protein secretion	74	12	10.28	0.09255
GO:0006091	generation of precursor metabolites and energy	258	67	35.83	0.09272
GO:0007605	sensory perception of sound	87	11	12.08	0.09273
GO:0018208	peptidyl-proline modification	49	14	6.8	0.09303
GO:0051351	positive regulation of ligase activity	10	3	1.39	0.09308
GO:0051443	positive regulation of ubiquitin-protein transferase activity	10	3	1.39	0.09308
GO:0001816	cytokine production	218	32	30.28	0.09308
GO:0044282	small molecule catabolic process	127	24	17.64	0.09323
GO:0045909	positive regulation of vasodilation	6	2	0.83	0.09352
GO:0060601	lateral sprouting from an epithelium	25	10	3.47	0.0937
GO:0032368	regulation of lipid transport	28	5	3.89	0.0939
GO:0048618	post-embryonic foregut morphogenesis	21	3	2.92	0.09392
GO:0060664	epithelial cell proliferation involved in salivary gland morphogenesis	17	6	2.36	0.09394
GO:0030656	regulation of vitamin metabolic process	29	0	4.03	0.09404
GO:0071702	organic substance transport	3081	453	427.88	0.09405
GO:0051603	proteolysis involved in cellular protein catabolic process	633	111	87.91	0.09407
GO:0018279	protein N-linked glycosylation via asparagine	11	5	1.53	0.09416
GO:0008285	negative regulation of cell proliferation	472	81	65.55	0.09484
GO:0045887	positive regulation of synaptic growth at neuromuscular junction	6	1	0.83	0.09484
GO:0007369	gastrulation	2067	266	287.06	0.0954
GO:0006360	transcription from RNA polymerase I promoter	10	2	1.39	0.09558
GO:0003281	ventricular septum development	75	19	10.42	0.09575
GO:0007126	meiotic nuclear division	274	48	38.05	0.09581
GO:0014002	astrocyte development	7	1	0.97	0.09632
GO:0043173	nucleotide salvage	19	1	2.64	0.09637
GO:0002521	leukocyte differentiation	541	87	75.13	0.09652
GO:0016192	vesicle-mediated transport	1646	270	228.59	0.09672
GO:1901071	glucosamine-containing compound metabolic process	16	7	2.22	0.09676
GO:0006030	chitin metabolic process	9	2	1.25	0.09689
GO:0010951	negative regulation of endopeptidase activity	241	47	33.47	0.09697
GO:0006915	apoptotic process	2058	297	285.81	0.09716
GO:0045686	negative regulation of glial cell differentiation	63	6	8.75	0.09728
GO:0005996	monosaccharide metabolic process	165	40	22.91	0.09734
GO:0010604	positive regulation of macromolecule metabolic process	3072	440	426.63	0.09753
GO:1903320	regulation of protein modification by small protein conjugation or removal	147	26	20.41	0.09759
GO:0044255	cellular lipid metabolic process	708	121	98.32	0.09823
GO:0015858	nucleoside transport	41	5	5.69	0.09841
GO:0016446	somatic hypermutation of immunoglobulin genes	10	0	1.39	0.09842
GO:0002566	somatic diversification of immune receptors via somatic mutation	10	0	1.39	0.09842
GO:0060191	regulation of lipase activity	63	16	8.75	0.09846
GO:0071526	semaphorin-plexin signaling pathway	16	5	2.22	0.09849
GO:0042119	neutrophil activation	20	6	2.78	0.09894
GO:0002253	activation of immune response	444	76	61.66	0.09906
GO:0006633	fatty acid biosynthetic process	105	23	14.58	0.09921
GO:0003228	atrial cardiac muscle tissue development	15	4	2.08	0.09936
GO:0060982	coronary artery morphogenesis	36	6	5	0.0996
GO:0009447	putrescine catabolic process	6	3	0.83	0.10002
GO:0006598	polyamine catabolic process	6	3	0.83	0.10002
GO:0044264	cellular polysaccharide metabolic process	89	10	12.36	0.10059
GO:0070307	lens fiber cell development	65	8	9.03	0.10085
GO:0006730	one-carbon metabolic process	46	7	6.39	0.10112
GO:0048670	regulation of collateral sprouting	122	19	16.94	0.10115
GO:0044342	type B pancreatic cell proliferation	6	1	0.83	0.10117
GO:0044343	canonical Wnt signaling pathway involved in regulation of type B pancreatic cell proliferation	6	1	0.83	0.10117
GO:2000079	regulation of canonical Wnt signaling pathway involved in controlling type B pancreatic cell proliferation	6	1	0.83	0.10117
GO:0061469	regulation of type B pancreatic cell proliferation	6	1	0.83	0.10117
GO:0090312	positive regulation of protein deacetylation	11	4	1.53	0.10153
GO:0048883	neuromast primordium migration	24	7	3.33	0.10173
GO:0048920	posterior lateral line neuromast primordium migration	24	7	3.33	0.10173
GO:0007595	lactation	8	3	1.11	0.10188
GO:0032387	negative regulation of intracellular transport	40	8	5.56	0.10194
GO:0072107	positive regulation of ureteric bud formation	7	1	0.97	0.10211
GO:0021545	cranial nerve development	258	28	35.83	0.10239
GO:0032262	pyrimidine nucleotide salvage	12	1	1.67	0.103
GO:0008655	pyrimidine-containing compound salvage	12	1	1.67	0.103
GO:0010138	pyrimidine ribonucleotide salvage	12	1	1.67	0.103
GO:0060959	cardiac neuron development	12	5	1.67	0.10316
GO:0060945	cardiac neuron differentiation	12	5	1.67	0.10316
GO:0008283	cell proliferation	1891	297	262.62	0.10356
GO:0060425	lung morphogenesis	102	20	14.17	0.10363
GO:0003171	atrioventricular valve development	69	15	9.58	0.10373
GO:0032793	positive regulation of CREB transcription factor activity	9	1	1.25	0.1039
GO:0030277	maintenance of gastrointestinal epithelium	30	3	4.17	0.10392
GO:0019377	glycolipid catabolic process	10	2	1.39	0.10407
GO:0046479	glycosphingolipid catabolic process	10	2	1.39	0.10407
GO:0008272	sulfate transport	16	3	2.22	0.10407
GO:0021631	optic nerve morphogenesis	21	0	2.92	0.10413
GO:0035924	cellular response to vascular endothelial growth factor stimulus	97	23	13.47	0.1042
GO:0048066	developmental pigmentation	341	60	47.36	0.10438
GO:0021957	corticospinal tract morphogenesis	34	4	4.72	0.10441
GO:0045604	regulation of epidermal cell differentiation	29	9	4.03	0.10446
GO:0010954	positive regulation of protein processing	41	6	5.69	0.10455
GO:1903319	positive regulation of protein maturation	41	6	5.69	0.10455
GO:0045862	positive regulation of proteolysis	41	6	5.69	0.10455
GO:0046486	glycerolipid metabolic process	251	37	34.86	0.10481
GO:0048144	fibroblast proliferation	28	7	3.89	0.10509
GO:0048337	positive regulation of mesodermal cell fate specification	51	10	7.08	0.10521
GO:0042660	positive regulation of cell fate specification	51	10	7.08	0.10521
GO:2000027	regulation of organ morphogenesis	477	61	66.24	0.10525
GO:0003014	renal system process	86	18	11.94	0.10536
GO:0043488	regulation of mRNA stability	152	12	21.11	0.10558
GO:0030517	negative regulation of axon extension	138	20	19.16	0.10587
GO:0006448	regulation of translational elongation	29	6	4.03	0.10599
GO:0046942	carboxylic acid transport	166	26	23.05	0.10618
GO:0003006	developmental process involved in reproduction	1062	186	147.49	0.10633
GO:0021953	central nervous system neuron differentiation	767	103	106.52	0.10642
GO:0090189	regulation of branching involved in ureteric bud morphogenesis	17	3	2.36	0.10654
GO:0010159	specification of organ position	21	1	2.92	0.10662
GO:0046880	regulation of follicle-stimulating hormone secretion	21	1	2.92	0.10669
GO:1990267	response to transition metal nanoparticle	96	22	13.33	0.10672
GO:0001654	eye development	1728	214	239.98	0.10695
GO:0042461	photoreceptor cell development	149	23	20.69	0.10724
GO:0032436	positive regulation of proteasomal ubiquitin-dependent protein catabolic process	25	4	3.47	0.10741
GO:0006901	vesicle coating	36	3	5	0.10743
GO:0015671	oxygen transport	32	3	4.44	0.10756
GO:0006022	aminoglycan metabolic process	126	17	17.5	0.10756
GO:0045197	establishment or maintenance of epithelial cell apical/basal polarity	37	8	5.14	0.10777
GO:0002706	regulation of lymphocyte mediated immunity	21	5	2.92	0.10778
GO:0050810	regulation of steroid biosynthetic process	41	4	5.69	0.1083
GO:0031114	regulation of microtubule depolymerization	33	2	4.58	0.10851
GO:0030917	midbrain-hindbrain boundary development	127	14	17.64	0.10862
GO:0060670	branching involved in labyrinthine layer morphogenesis	14	5	1.94	0.10865
GO:0050866	negative regulation of cell activation	49	8	6.8	0.10869
GO:0002053	positive regulation of mesenchymal cell proliferation	41	9	5.69	0.10872
GO:0040008	regulation of growth	751	123	104.3	0.10881
GO:0034097	response to cytokine	201	42	27.91	0.10894
GO:0019755	one-carbon compound transport	17	1	2.36	0.10895
GO:0050930	induction of positive chemotaxis	8	4	1.11	0.10896
GO:0023061	signal release	354	46	49.16	0.10923
GO:0072047	proximal/distal pattern formation involved in nephron development	140	23	19.44	0.10947
GO:0048864	stem cell development	1195	164	165.96	0.1098
GO:0048010	vascular endothelial growth factor receptor signaling pathway	212	41	29.44	0.10983
GO:0010596	negative regulation of endothelial cell migration	15	6	2.08	0.10991
GO:0010633	negative regulation of epithelial cell migration	15	6	2.08	0.10991
GO:0045736	negative regulation of cyclin-dependent protein serine/threonine kinase activity	15	6	2.08	0.10991
GO:0048885	neuromast deposition	8	0	1.11	0.10993
GO:0006636	unsaturated fatty acid biosynthetic process	36	9	5	0.11
GO:0043497	regulation of protein heterodimerization activity	18	4	2.5	0.1104
GO:0046890	regulation of lipid biosynthetic process	82	4	11.39	0.11045
GO:0060896	neural plate pattern specification	47	5	6.53	0.11046
GO:0030004	cellular monovalent inorganic cation homeostasis	18	9	2.5	0.11047
GO:0051223	regulation of protein transport	286	37	39.72	0.1105
GO:0030155	regulation of cell adhesion	431	60	59.86	0.11065
GO:0001919	regulation of receptor recycling	6	3	0.83	0.11069
GO:0072329	monocarboxylic acid catabolic process	31	10	4.31	0.1109
GO:0060972	left/right pattern formation	109	14	15.14	0.11095
GO:0046036	CTP metabolic process	23	1	3.19	0.11101
GO:0006241	CTP biosynthetic process	23	1	3.19	0.11101
GO:0032414	positive regulation of ion transmembrane transporter activity	38	6	5.28	0.11109
GO:0043388	positive regulation of DNA binding	26	2	3.61	0.11163
GO:0002250	adaptive immune response	109	22	15.14	0.11201
GO:0010165	response to X-ray	28	7	3.89	0.11222
GO:0032271	regulation of protein polymerization	199	32	27.64	0.11227
GO:0030501	positive regulation of bone mineralization	30	6	4.17	0.11255
GO:0070169	positive regulation of biomineral tissue development	30	6	4.17	0.11255
GO:0045058	T cell selection	19	5	2.64	0.11289
GO:0039017	pattern specification involved in pronephros development	167	29	23.19	0.11291
GO:0007010	cytoskeleton organization	2851	416	395.94	0.11296
GO:0002688	regulation of leukocyte chemotaxis	19	6	2.64	0.11322
GO:0009949	polarity specification of anterior/posterior axis	11	3	1.53	0.1133
GO:0016539	intein-mediated protein splicing	11	3	1.53	0.1133
GO:0030908	protein splicing	11	3	1.53	0.1133
GO:0043624	cellular protein complex disassembly	150	17	20.83	0.11334
GO:0007379	segment specification	289	38	40.14	0.11343
GO:0042063	gliogenesis	663	106	92.08	0.11364
GO:0072179	nephric duct formation	11	2	1.53	0.11399
GO:0060349	bone morphogenesis	206	31	28.61	0.11408
GO:0010660	regulation of muscle cell apoptotic process	9	4	1.25	0.11416
GO:0010656	negative regulation of muscle cell apoptotic process	9	4	1.25	0.11416
GO:0010657	muscle cell apoptotic process	9	4	1.25	0.11416
GO:0001906	cell killing	30	7	4.17	0.11428
GO:0015780	nucleotide-sugar transport	7	1	0.97	0.11451
GO:0019184	nonribosomal peptide biosynthetic process	7	0	0.97	0.11466
GO:0043043	peptide biosynthetic process	7	0	0.97	0.11466
GO:0071696	ectodermal placode development	264	29	36.66	0.11474
GO:0032940	secretion by cell	661	87	91.8	0.11477
GO:0042559	pteridine-containing compound biosynthetic process	17	6	2.36	0.11478
GO:0009298	GDP-mannose biosynthetic process	6	3	0.83	0.11483
GO:0007214	gamma-aminobutyric acid signaling pathway	48	9	6.67	0.11499
GO:0009060	aerobic respiration	38	10	5.28	0.11501
GO:2001021	negative regulation of response to DNA damage stimulus	13	3	1.81	0.11502
GO:0016052	carbohydrate catabolic process	133	45	18.47	0.11516
GO:0030901	midbrain development	176	29	24.44	0.1152
GO:0008213	protein alkylation	205	22	28.47	0.11542
GO:0006479	protein methylation	205	22	28.47	0.11542
GO:0045833	negative regulation of lipid metabolic process	29	5	4.03	0.11563
GO:0045910	negative regulation of DNA recombination	12	0	1.67	0.11564
GO:0090259	regulation of retinal ganglion cell axon guidance	11	2	1.53	0.11569
GO:0010662	regulation of striated muscle cell apoptotic process	8	4	1.11	0.11587
GO:0010664	negative regulation of striated muscle cell apoptotic process	8	4	1.11	0.11587
GO:0010665	regulation of cardiac muscle cell apoptotic process	8	4	1.11	0.11587
GO:0010667	negative regulation of cardiac muscle cell apoptotic process	8	4	1.11	0.11587
GO:0010658	striated muscle cell apoptotic process	8	4	1.11	0.11587
GO:0010659	cardiac muscle cell apoptotic process	8	4	1.11	0.11587
GO:0002702	positive regulation of production of molecular mediator of immune response	12	2	1.67	0.11604
GO:0006450	regulation of translational fidelity	18	5	2.5	0.11606
GO:0022904	respiratory electron transport chain	20	7	2.78	0.11645
GO:0032461	positive regulation of protein oligomerization	8	3	1.11	0.1165
GO:0044036	cell wall macromolecule metabolic process	23	3	3.19	0.11652
GO:0016998	cell wall macromolecule catabolic process	23	3	3.19	0.11652
GO:0071554	cell wall organization or biogenesis	23	3	3.19	0.11652
GO:0034219	carbohydrate transmembrane transport	20	5	2.78	0.11652
GO:0006672	ceramide metabolic process	46	5	6.39	0.11656
GO:0072009	nephron epithelium development	407	63	56.52	0.11663
GO:0043094	cellular metabolic compound salvage	48	2	6.67	0.11666
GO:0072081	specification of nephron tubule identity	104	17	14.44	0.11736
GO:0006694	steroid biosynthetic process	118	13	16.39	0.11745
GO:0042491	auditory receptor cell differentiation	102	17	14.17	0.11749
GO:2000117	negative regulation of cysteine-type endopeptidase activity	111	24	15.42	0.11753
GO:0043174	nucleoside salvage	21	0	2.92	0.11757
GO:0007440	foregut morphogenesis	56	8	7.78	0.11764
GO:0002683	negative regulation of immune system process	146	22	20.28	0.11768
GO:0007015	actin filament organization	376	54	52.22	0.11782
GO:0042775	mitochondrial ATP synthesis coupled electron transport	12	5	1.67	0.11782
GO:0021561	facial nerve development	7	1	0.97	0.1179
GO:0043101	purine-containing compound salvage	17	0	2.36	0.11851
GO:0019369	arachidonic acid metabolic process	8	4	1.11	0.11866
GO:0019371	cyclooxygenase pathway	8	4	1.11	0.11866
GO:0021587	cerebellum morphogenesis	91	15	12.64	0.11871
GO:0007423	sensory organ development	3014	394	418.57	0.11881
GO:0072073	kidney epithelium development	607	85	84.3	0.11889
GO:2000243	positive regulation of reproductive process	74	6	10.28	0.1192
GO:0050731	positive regulation of peptidyl-tyrosine phosphorylation	53	11	7.36	0.11929
GO:0022603	regulation of anatomical structure morphogenesis	1633	223	226.79	0.11929
GO:0060788	ectodermal placode formation	239	29	33.19	0.11932
GO:0071697	ectodermal placode morphogenesis	239	29	33.19	0.11932
GO:0007422	peripheral nervous system development	436	64	60.55	0.11944
GO:0043623	cellular protein complex assembly	525	75	72.91	0.11976
GO:0060523	prostate epithelial cord elongation	19	6	2.64	0.11986
GO:0060687	regulation of branching involved in prostate gland morphogenesis	19	6	2.64	0.11986
GO:0090022	regulation of neutrophil chemotaxis	15	5	2.08	0.12009
GO:1902622	regulation of neutrophil migration	15	5	2.08	0.12009
GO:0042446	hormone biosynthetic process	78	10	10.83	0.12025
GO:0007417	central nervous system development	3154	464	438.02	0.1203
GO:0051250	negative regulation of lymphocyte activation	47	8	6.53	0.12048
GO:0048705	skeletal system morphogenesis	839	118	116.52	0.1208
GO:0007338	single fertilization	39	5	5.42	0.12151
GO:0080009	mRNA methylation	6	1	0.83	0.12188
GO:0016556	mRNA modification	6	1	0.83	0.12188
GO:0060324	face development	128	14	17.78	0.12212
GO:0051047	positive regulation of secretion	98	12	13.61	0.12213
GO:0051783	regulation of nuclear division	137	24	19.03	0.12234
GO:0060216	definitive hemopoiesis	101	12	14.03	0.12275
GO:0007250	activation of NF-kappaB-inducing kinase activity	44	11	6.11	0.12299
GO:0090114	COPII-coated vesicle budding	14	0	1.94	0.12309
GO:0044743	intracellular protein transmembrane import	37	8	5.14	0.12313
GO:0060135	maternal process involved in female pregnancy	21	7	2.92	0.12335
GO:0051251	positive regulation of lymphocyte activation	103	21	14.3	0.12357
GO:0046885	regulation of hormone biosynthetic process	29	4	4.03	0.12361
GO:0007091	metaphase/anaphase transition of mitotic cell cycle	38	5	5.28	0.12433
GO:0044784	metaphase/anaphase transition of cell cycle	38	5	5.28	0.12433
GO:1902099	regulation of metaphase/anaphase transition of cell cycle	38	5	5.28	0.12433
GO:0030071	regulation of mitotic metaphase/anaphase transition	38	5	5.28	0.12433
GO:0051345	positive regulation of hydrolase activity	685	107	95.13	0.12435
GO:0019856	pyrimidine nucleobase biosynthetic process	7	0	0.97	0.12437
GO:0044205	'de novo' UMP biosynthetic process	7	0	0.97	0.12437
GO:0006207	'de novo' pyrimidine nucleobase biosynthetic process	7	0	0.97	0.12437
GO:0048026	positive regulation of mRNA splicing, via spliceosome	30	3	4.17	0.1244
GO:0043547	positive regulation of GTPase activity	424	63	58.88	0.12457
GO:0046887	positive regulation of hormone secretion	40	7	5.56	0.12499
GO:0035479	angioblast cell migration from lateral mesoderm to midline	11	2	1.53	0.12511
GO:0010880	regulation of release of sequestered calcium ion into cytosol by sarcoplasmic reticulum	10	3	1.39	0.12511
GO:0070296	sarcoplasmic reticulum calcium ion transport	10	3	1.39	0.12511
GO:0014808	release of sequestered calcium ion into cytosol by sarcoplasmic reticulum	10	3	1.39	0.12511
GO:0010644	cell communication by electrical coupling	10	2	1.39	0.12511
GO:0061564	axon development	2013	304	279.56	0.12519
GO:0072156	distal tubule morphogenesis	18	3	2.5	0.12533
GO:0039013	pronephric distal tubule morphogenesis	18	3	2.5	0.12533
GO:0046209	nitric oxide metabolic process	32	8	4.44	0.12546
GO:0030308	negative regulation of cell growth	259	31	35.97	0.12581
GO:0036303	lymph vessel morphogenesis	107	14	14.86	0.12582
GO:0001946	lymphangiogenesis	107	14	14.86	0.12582
GO:0007204	positive regulation of cytosolic calcium ion concentration	282	51	39.16	0.126
GO:0001756	somitogenesis	760	102	105.55	0.1263
GO:0043487	regulation of RNA stability	159	12	22.08	0.12635
GO:0090092	regulation of transmembrane receptor protein serine/threonine kinase signaling pathway	547	77	75.97	0.1266
GO:0010634	positive regulation of epithelial cell migration	66	9	9.17	0.12711
GO:0051246	regulation of protein metabolic process	2317	360	321.78	0.1272
GO:0034614	cellular response to reactive oxygen species	24	3	3.33	0.12747
GO:0009078	pyruvate family amino acid metabolic process	8	3	1.11	0.12751
GO:0006522	alanine metabolic process	8	3	1.11	0.12751
GO:0042851	L-alanine metabolic process	8	3	1.11	0.12751
GO:0051336	regulation of hydrolase activity	1403	223	194.84	0.12778
GO:0017055	negative regulation of RNA polymerase II transcriptional preinitiation complex assembly	15	3	2.08	0.1278
GO:0045898	regulation of RNA polymerase II transcriptional preinitiation complex assembly	15	3	2.08	0.1278
GO:0050954	sensory perception of mechanical stimulus	106	15	14.72	0.12798
GO:0001844	protein insertion into mitochondrial membrane involved in apoptotic signaling pathway	7	3	0.97	0.12827
GO:0051204	protein insertion into mitochondrial membrane	7	3	0.97	0.12827
GO:1900740	positive regulation of protein insertion into mitochondrial membrane involved in apoptotic signaling pathway	7	3	0.97	0.12827
GO:1900739	regulation of protein insertion into mitochondrial membrane involved in apoptotic signaling pathway	7	3	0.97	0.12827
GO:1901028	regulation of mitochondrial outer membrane permeabilization involved in apoptotic signaling pathway	7	3	0.97	0.12827
GO:0030513	positive regulation of BMP signaling pathway	109	16	15.14	0.12891
GO:0008543	fibroblast growth factor receptor signaling pathway	373	61	51.8	0.12912
GO:0032462	regulation of protein homooligomerization	16	2	2.22	0.12914
GO:0048709	oligodendrocyte differentiation	179	29	24.86	0.12934
GO:0050663	cytokine secretion	40	7	5.56	0.1298
GO:0050817	coagulation	214	40	29.72	0.13005
GO:0060485	mesenchyme development	1467	203	203.73	0.13007
GO:0097039	protein linear polyubiquitination	8	1	1.11	0.13042
GO:0051480	cytosolic calcium ion homeostasis	296	51	41.11	0.131
GO:0051650	establishment of vesicle localization	200	40	27.78	0.13114
GO:0045110	intermediate filament bundle assembly	30	6	4.17	0.13129
GO:0090100	positive regulation of transmembrane receptor protein serine/threonine kinase signaling pathway	180	23	25	0.1315
GO:0050715	positive regulation of cytokine secretion	19	3	2.64	0.1321
GO:0046836	glycolipid transport	6	1	0.83	0.13229
GO:0023019	signal transduction involved in regulation of gene expression	15	0	2.08	0.13236
GO:0048869	cellular developmental process	9540	1341	1324.88	0.13263
GO:0006378	mRNA polyadenylation	32	3	4.44	0.13264
GO:0030278	regulation of ossification	145	16	20.14	0.13267
GO:0048286	lung alveolus development	57	11	7.92	0.13276
GO:0060541	respiratory system development	484	65	67.22	0.13335
GO:0061001	regulation of dendritic spine morphogenesis	61	6	8.47	0.13343
GO:0048583	regulation of response to stimulus	4962	726	689.11	0.13382
GO:0060627	regulation of vesicle-mediated transport	302	49	41.94	0.1343
GO:0001707	mesoderm formation	688	82	95.55	0.1346
GO:0003181	atrioventricular valve morphogenesis	51	10	7.08	0.13526
GO:0007263	nitric oxide mediated signal transduction	9	2	1.25	0.13545
GO:0048268	clathrin coat assembly	23	3	3.19	0.13592
GO:1902667	regulation of axon guidance	27	5	3.75	0.13595
GO:0007218	neuropeptide signaling pathway	126	14	17.5	0.1361
GO:0007626	locomotory behavior	189	25	26.25	0.13628
GO:0000096	sulfur amino acid metabolic process	36	3	5	0.13642
GO:0031065	positive regulation of histone deacetylation	10	4	1.39	0.13649
GO:0046500	S-adenosylmethionine metabolic process	12	0	1.67	0.13669
GO:0045048	protein insertion into ER membrane	9	2	1.25	0.13686
GO:0051574	positive regulation of histone H3-K9 methylation	8	2	1.11	0.13746
GO:0001955	blood vessel maturation	18	4	2.5	0.1378
GO:0010563	negative regulation of phosphorus metabolic process	285	46	39.58	0.13782
GO:0045936	negative regulation of phosphate metabolic process	285	46	39.58	0.13782
GO:0009966	regulation of signal transduction	4189	624	581.75	0.13789
GO:0051928	positive regulation of calcium ion transport	23	7	3.19	0.13793
GO:2001259	positive regulation of cation channel activity	10	4	1.39	0.13801
GO:1901021	positive regulation of calcium ion transmembrane transporter activity	10	4	1.39	0.13801
GO:0003170	heart valve development	121	23	16.8	0.13836
GO:0030510	regulation of BMP signaling pathway	420	57	58.33	0.1387
GO:0021670	lateral ventricle development	6	3	0.83	0.13886
GO:0016072	rRNA metabolic process	96	10	13.33	0.13889
GO:0014029	neural crest formation	425	52	59.02	0.13962
GO:0032862	activation of Rho GTPase activity	57	11	7.92	0.13973
GO:0032856	activation of Ras GTPase activity	57	11	7.92	0.13973
GO:0072574	hepatocyte proliferation	35	3	4.86	0.13979
GO:0072575	epithelial cell proliferation involved in liver morphogenesis	35	3	4.86	0.13979
GO:0030029	actin filament-based process	1386	193	192.48	0.13982
GO:0002467	germinal center formation	16	4	2.22	0.1399
GO:0002712	regulation of B cell mediated immunity	16	4	2.22	0.1399
GO:0002889	regulation of immunoglobulin mediated immune response	16	4	2.22	0.1399
GO:0031365	N-terminal protein amino acid modification	11	3	1.53	0.14003
GO:2001234	negative regulation of apoptotic signaling pathway	25	7	3.47	0.14009
GO:0070306	lens fiber cell differentiation	84	10	11.67	0.14042
GO:0034314	Arp2/3 complex-mediated actin nucleation	21	5	2.92	0.14066
GO:0006613	cotranslational protein targeting to membrane	11	3	1.53	0.14094
GO:0021549	cerebellum development	145	23	20.14	0.14126
GO:0030902	hindbrain development	736	117	102.21	0.14181
GO:0045787	positive regulation of cell cycle	79	16	10.97	0.14263
GO:0006888	ER to Golgi vesicle-mediated transport	52	11	7.22	0.1427
GO:0001731	formation of translation preinitiation complex	39	4	5.42	0.14299
GO:0044724	single-organism carbohydrate catabolic process	127	42	17.64	0.14305
GO:0044093	positive regulation of molecular function	1692	254	234.98	0.14305
GO:0048599	oocyte development	206	36	28.61	0.14313
GO:0035304	regulation of protein dephosphorylation	13	3	1.81	0.14318
GO:0042661	regulation of mesodermal cell fate specification	62	11	8.61	0.14319
GO:0021513	spinal cord dorsal/ventral patterning	65	14	9.03	0.14336
GO:0035476	angioblast cell migration	45	8	6.25	0.14337
GO:0033365	protein localization to organelle	381	70	52.91	0.14344
GO:0045813	positive regulation of Wnt signaling pathway, calcium modulating pathway	8	0	1.11	0.1435
GO:0002576	platelet degranulation	14	2	1.94	0.14371
GO:0007163	establishment or maintenance of cell polarity	505	79	70.13	0.14372
GO:0009893	positive regulation of metabolic process	3343	466	464.26	0.14387
GO:0001101	response to acid chemical	362	69	50.27	0.14397
GO:0048840	otolith development	176	20	24.44	0.14398
GO:0055062	phosphate ion homeostasis	7	3	0.97	0.14411
GO:0072506	trivalent inorganic anion homeostasis	7	3	0.97	0.14411
GO:0030002	cellular anion homeostasis	7	3	0.97	0.14411
GO:0032370	positive regulation of lipid transport	11	2	1.53	0.14416
GO:0021766	hippocampus development	90	11	12.5	0.14428
GO:0006220	pyrimidine nucleotide metabolic process	49	5	6.8	0.14431
GO:0042325	regulation of phosphorylation	1478	246	205.26	0.14443
GO:0006260	DNA replication	326	41	45.27	0.14464
GO:0048519	negative regulation of biological process	5915	822	821.46	0.14505
GO:0006556	S-adenosylmethionine biosynthetic process	7	0	0.97	0.14517
GO:0007405	neuroblast proliferation	154	21	21.39	0.14546
GO:0008039	synaptic target recognition	10	4	1.39	0.14569
GO:0090520	sphingolipid mediated signaling pathway	26	4	3.61	0.14572
GO:0003376	sphingosine-1-phosphate signaling pathway	26	4	3.61	0.14572
GO:0048048	embryonic eye morphogenesis	274	36	38.05	0.14601
GO:0051205	protein insertion into membrane	18	5	2.5	0.14626
GO:0045598	regulation of fat cell differentiation	31	3	4.31	0.14645
GO:0002698	negative regulation of immune effector process	48	6	6.67	0.14649
GO:0046850	regulation of bone remodeling	14	1	1.94	0.14654
GO:0034103	regulation of tissue remodeling	14	1	1.94	0.14654
GO:0046218	indolalkylamine catabolic process	9	2	1.25	0.14672
GO:0042436	indole-containing compound catabolic process	9	2	1.25	0.14672
GO:0006568	tryptophan metabolic process	9	2	1.25	0.14672
GO:0006569	tryptophan catabolic process	9	2	1.25	0.14672
GO:0006586	indolalkylamine metabolic process	9	2	1.25	0.14672
GO:0060600	dichotomous subdivision of an epithelial terminal unit	25	7	3.47	0.14673
GO:0030810	positive regulation of nucleotide biosynthetic process	96	11	13.33	0.14696
GO:0030804	positive regulation of cyclic nucleotide biosynthetic process	96	11	13.33	0.14696
GO:1900373	positive regulation of purine nucleotide biosynthetic process	96	11	13.33	0.14696
GO:1900544	positive regulation of purine nucleotide metabolic process	96	11	13.33	0.14696
GO:0070633	transepithelial transport	9	0	1.25	0.1473
GO:0051570	regulation of histone H3-K9 methylation	11	2	1.53	0.14734
GO:0016255	attachment of GPI anchor to protein	6	2	0.83	0.14737
GO:0045137	development of primary sexual characteristics	388	64	53.88	0.14784
GO:0048514	blood vessel morphogenesis	1899	290	263.73	0.14804
GO:0008202	steroid metabolic process	262	39	36.39	0.14819
GO:0070376	regulation of ERK5 cascade	17	0	2.36	0.14835
GO:0039005	specification of pronephric tubule identity	88	14	12.22	0.14852
GO:0048935	peripheral nervous system neuron development	180	24	25	0.14862
GO:0002686	negative regulation of leukocyte migration	12	5	1.67	0.14878
GO:0001568	blood vessel development	2325	349	322.89	0.14888
GO:0006739	NADP metabolic process	20	6	2.78	0.14924
GO:0043112	receptor metabolic process	82	15	11.39	0.14933
GO:0043243	positive regulation of protein complex disassembly	15	2	2.08	0.14944
GO:0071560	cellular response to transforming growth factor beta stimulus	175	21	24.3	0.14967
GO:0071559	response to transforming growth factor beta	175	21	24.3	0.14967
GO:0048821	erythrocyte development	171	22	23.75	0.15012
GO:0035283	central nervous system segmentation	73	15	10.14	0.15053
GO:0035284	brain segmentation	73	15	10.14	0.15053
GO:0051349	positive regulation of lyase activity	69	9	9.58	0.15061
GO:0031281	positive regulation of cyclase activity	69	9	9.58	0.15061
GO:0009110	vitamin biosynthetic process	14	2	1.94	0.15086
GO:0007589	body fluid secretion	22	5	3.06	0.15091
GO:0009263	deoxyribonucleotide biosynthetic process	7	3	0.97	0.15118
GO:0021634	optic nerve formation	19	0	2.64	0.15131
GO:0021603	cranial nerve formation	19	0	2.64	0.15131
GO:0034333	adherens junction assembly	138	12	19.16	0.15138
GO:0048753	pigment granule organization	23	9	3.19	0.15155
GO:0060062	Spemann organizer formation at the dorsal lip of the blastopore	24	5	3.33	0.15163
GO:0006891	intra-Golgi vesicle-mediated transport	33	6	4.58	0.15168
GO:0048854	brain morphogenesis	89	10	12.36	0.15189
GO:0043097	pyrimidine nucleoside salvage	11	0	1.53	0.15207
GO:0044211	CTP salvage	11	0	1.53	0.15207
GO:0044206	UMP salvage	11	0	1.53	0.15207
GO:0002522	leukocyte migration involved in immune response	6	2	0.83	0.15261
GO:0030258	lipid modification	143	23	19.86	0.15262
GO:0042490	mechanoreceptor differentiation	246	38	34.16	0.15307
GO:0090162	establishment of epithelial cell polarity	81	16	11.25	0.1531
GO:0030488	tRNA methylation	14	1	1.94	0.15316
GO:0032516	positive regulation of phosphoprotein phosphatase activity	13	4	1.81	0.15337
GO:0061337	cardiac conduction	13	3	1.81	0.15337
GO:0032835	glomerulus development	199	26	27.64	0.15352
GO:0097154	GABAergic neuron differentiation	7	1	0.97	0.15358
GO:0001945	lymph vessel development	155	31	21.53	0.15393
GO:0042698	ovulation cycle	116	20	16.11	0.154
GO:0022602	ovulation cycle process	116	20	16.11	0.154
GO:0051153	regulation of striated muscle cell differentiation	90	19	12.5	0.15405
GO:0031061	negative regulation of histone methylation	6	2	0.83	0.15548
GO:0014074	response to purine-containing compound	11	3	1.53	0.15559
GO:0006909	phagocytosis	65	8	9.03	0.15572
GO:0045940	positive regulation of steroid metabolic process	10	0	1.39	0.15574
GO:0006576	cellular biogenic amine metabolic process	69	16	9.58	0.15594
GO:0033598	mammary gland epithelial cell proliferation	10	1	1.39	0.15621
GO:0006750	glutathione biosynthetic process	6	0	0.83	0.15624
GO:0046883	regulation of hormone secretion	142	19	19.72	0.1563
GO:0060592	mammary gland formation	14	5	1.94	0.15652
GO:0060594	mammary gland specification	14	5	1.94	0.15652
GO:0032956	regulation of actin cytoskeleton organization	311	42	43.19	0.15655
GO:0031325	positive regulation of cellular metabolic process	3192	442	443.29	0.1566
GO:0060021	palate development	127	15	17.64	0.15665
GO:0060872	semicircular canal development	151	23	20.97	0.15729
GO:0070848	response to growth factor	936	144	129.99	0.15758
GO:0048523	negative regulation of cellular process	5211	718	723.69	0.15765
GO:0002381	immunoglobulin production involved in immunoglobulin mediated immune response	22	0	3.06	0.15801
GO:0060123	regulation of growth hormone secretion	14	0	1.94	0.15802
GO:0060575	intestinal epithelial cell differentiation	10	2	1.39	0.15826
GO:0006665	sphingolipid metabolic process	96	11	13.33	0.15843
GO:0001763	morphogenesis of a branching structure	718	122	99.71	0.15858
GO:0009147	pyrimidine nucleoside triphosphate metabolic process	28	1	3.89	0.1586
GO:0009148	pyrimidine nucleoside triphosphate biosynthetic process	28	1	3.89	0.1586
GO:0043516	regulation of DNA damage response, signal transduction by p53 class mediator	19	3	2.64	0.15869
GO:0006818	hydrogen transport	153	61	21.25	0.15869
GO:0022008	neurogenesis	4603	653	639.25	0.15871
GO:0031016	pancreas development	596	81	82.77	0.15884
GO:0090190	positive regulation of branching involved in ureteric bud morphogenesis	15	2	2.08	0.15913
GO:0043525	positive regulation of neuron apoptotic process	79	12	10.97	0.15914
GO:1901216	positive regulation of neuron death	79	12	10.97	0.15914
GO:0046174	polyol catabolic process	11	0	1.53	0.15935
GO:0033578	protein glycosylation in Golgi	8	0	1.11	0.15945
GO:0036071	N-glycan fucosylation	8	0	1.11	0.15945
GO:0031099	regeneration	513	96	71.24	0.15953
GO:0008608	attachment of spindle microtubules to kinetochore	47	9	6.53	0.15977
GO:0030100	regulation of endocytosis	184	32	25.55	0.15982
GO:0055117	regulation of cardiac muscle contraction	19	6	2.64	0.15987
GO:0006664	glycolipid metabolic process	78	10	10.83	0.16
GO:0035065	regulation of histone acetylation	12	2	1.67	0.16019
GO:1901983	regulation of protein acetylation	12	2	1.67	0.16019
GO:2000756	regulation of peptidyl-lysine acetylation	12	2	1.67	0.16019
GO:0034329	cell junction assembly	213	32	29.58	0.16035
GO:0050764	regulation of phagocytosis	15	0	2.08	0.16035
GO:0002312	B cell activation involved in immune response	20	0	2.78	0.16048
GO:0002204	somatic recombination of immunoglobulin genes involved in immune response	20	0	2.78	0.16048
GO:0002208	somatic diversification of immunoglobulins involved in immune response	20	0	2.78	0.16048
GO:0045190	isotype switching	20	0	2.78	0.16048
GO:1900180	regulation of protein localization to nucleus	116	20	16.11	0.16055
GO:2000401	regulation of lymphocyte migration	13	4	1.81	0.16103
GO:0060745	mammary gland branching involved in pregnancy	6	0	0.83	0.16142
GO:1901571	fatty acid derivative transport	11	4	1.53	0.16145
GO:0032309	icosanoid secretion	11	4	1.53	0.16145
GO:0071715	icosanoid transport	11	4	1.53	0.16145
GO:0061217	regulation of mesonephros development	65	8	9.03	0.16164
GO:0043096	purine nucleobase salvage	11	0	1.53	0.16167
GO:0070375	ERK5 cascade	20	1	2.78	0.16183
GO:0006342	chromatin silencing	19	3	2.64	0.16192
GO:0045814	negative regulation of gene expression, epigenetic	19	3	2.64	0.16192
GO:0045646	regulation of erythrocyte differentiation	60	8	8.33	0.16194
GO:0016197	endosomal transport	294	54	40.83	0.162
GO:0000184	nuclear-transcribed mRNA catabolic process, nonsense-mediated decay	56	6	7.78	0.16252
GO:0035141	medial fin morphogenesis	96	14	13.33	0.16264
GO:0048041	focal adhesion assembly	118	11	16.39	0.16264
GO:0044106	cellular amine metabolic process	93	21	12.92	0.16296
GO:0031334	positive regulation of protein complex assembly	170	32	23.61	0.16326
GO:0038084	vascular endothelial growth factor signaling pathway	94	21	13.05	0.16388
GO:0060716	labyrinthine layer blood vessel development	11	3	1.53	0.16398
GO:0009113	purine nucleobase biosynthetic process	15	0	2.08	0.16426
GO:0071623	negative regulation of granulocyte chemotaxis	9	4	1.25	0.16448
GO:0090024	negative regulation of neutrophil chemotaxis	9	4	1.25	0.16448
GO:1902623	negative regulation of neutrophil migration	9	4	1.25	0.16448
GO:0002689	negative regulation of leukocyte chemotaxis	9	4	1.25	0.16448
GO:0050821	protein stabilization	66	6	9.17	0.16461
GO:0071345	cellular response to cytokine stimulus	179	37	24.86	0.16517
GO:2001235	positive regulation of apoptotic signaling pathway	49	5	6.8	0.1653
GO:2000045	regulation of G1/S transition of mitotic cell cycle	23	4	3.19	0.16538
GO:1902806	regulation of cell cycle G1/S phase transition	23	4	3.19	0.16538
GO:0009308	amine metabolic process	98	22	13.61	0.16547
GO:0007052	mitotic spindle organization	169	28	23.47	0.16561
GO:0006027	glycosaminoglycan catabolic process	9	2	1.25	0.16583
GO:0000270	peptidoglycan metabolic process	9	2	1.25	0.16583
GO:0009253	peptidoglycan catabolic process	9	2	1.25	0.16583
GO:0030042	actin filament depolymerization	87	12	12.08	0.16607
GO:0034762	regulation of transmembrane transport	383	51	53.19	0.16614
GO:0019318	hexose metabolic process	156	38	21.66	0.16636
GO:0009168	purine ribonucleoside monophosphate biosynthetic process	81	16	11.25	0.16647
GO:0009127	purine nucleoside monophosphate biosynthetic process	81	16	11.25	0.16647
GO:0009208	pyrimidine ribonucleoside triphosphate metabolic process	24	1	3.33	0.16659
GO:0009209	pyrimidine ribonucleoside triphosphate biosynthetic process	24	1	3.33	0.16659
GO:0030539	male genitalia development	78	10	10.83	0.16703
GO:0010628	positive regulation of gene expression	1772	251	246.09	0.16735
GO:0032507	maintenance of protein location in cell	114	14	15.83	0.1675
GO:0051651	maintenance of location in cell	114	14	15.83	0.1675
GO:2000648	positive regulation of stem cell proliferation	82	13	11.39	0.16764
GO:0014066	regulation of phosphatidylinositol 3-kinase signaling	31	2	4.31	0.1678
GO:0046113	nucleobase catabolic process	24	3	3.33	0.16803
GO:0009310	amine catabolic process	18	6	2.5	0.16841
GO:0042402	cellular biogenic amine catabolic process	18	6	2.5	0.16841
GO:0060603	mammary gland duct morphogenesis	53	9	7.36	0.16857
GO:0044468	envenomation resulting in modulation of blood coagulation in other organism	45	7	6.25	0.16867
GO:0072079	nephron tubule formation	113	19	15.69	0.16882
GO:0097529	myeloid leukocyte migration	65	13	9.03	0.16887
GO:0051261	protein depolymerization	142	16	19.72	0.16941
GO:0030098	lymphocyte differentiation	366	61	50.83	0.16968
GO:0008089	anterograde axon cargo transport	31	8	4.31	0.16976
GO:2001222	regulation of neuron migration	21	7	2.92	0.16985
GO:0050765	negative regulation of phagocytosis	10	0	1.39	0.17009
GO:0051321	meiotic cell cycle	315	54	43.75	0.1702
GO:0032196	transposition	11	3	1.53	0.17024
GO:0006313	transposition, DNA-mediated	11	3	1.53	0.17024
GO:2000021	regulation of ion homeostasis	85	15	11.8	0.17045
GO:0051726	regulation of cell cycle	974	162	135.27	0.17115
GO:0060031	mediolateral intercalation	63	7	8.75	0.17136
GO:0048484	enteric nervous system development	78	11	10.83	0.1714
GO:0014888	striated muscle adaptation	17	6	2.36	0.17169
GO:0043501	skeletal muscle adaptation	10	3	1.39	0.17186
GO:0090136	epithelial cell-cell adhesion	37	9	5.14	0.17201
GO:0008154	actin polymerization or depolymerization	229	34	31.8	0.17222
GO:0003140	determination of left/right asymmetry in lateral mesoderm	163	22	22.64	0.17264
GO:0042254	ribosome biogenesis	151	15	20.97	0.17278
GO:0016126	sterol biosynthetic process	33	6	4.58	0.17315
GO:0071622	regulation of granulocyte chemotaxis	17	5	2.36	0.17333
GO:0009914	hormone transport	211	34	29.3	0.17336
GO:0046879	hormone secretion	211	34	29.3	0.17336
GO:0032673	regulation of interleukin-4 production	7	2	0.97	0.17367
GO:0006166	purine ribonucleoside salvage	10	0	1.39	0.17397
GO:0033627	cell adhesion mediated by integrin	23	2	3.19	0.17417
GO:0006950	response to stress	4018	614	558.01	0.1743
GO:0019319	hexose biosynthetic process	88	25	12.22	0.17469
GO:0035306	positive regulation of dephosphorylation	9	3	1.25	0.17484
GO:0035307	positive regulation of protein dephosphorylation	9	3	1.25	0.17484
GO:0043117	positive regulation of vascular permeability	8	1	1.11	0.17493
GO:0061371	determination of heart left/right asymmetry	499	65	69.3	0.17516
GO:0042886	amide transport	115	17	15.97	0.17527
GO:0060562	epithelial tube morphogenesis	1287	171	178.73	0.17532
GO:0008610	lipid biosynthetic process	487	71	67.63	0.17556
GO:0042472	inner ear morphogenesis	644	80	89.44	0.17565
GO:0060088	auditory receptor cell stereocilium organization	12	4	1.67	0.17575
GO:0002093	auditory receptor cell morphogenesis	12	4	1.67	0.17575
GO:0060998	regulation of dendritic spine development	79	12	10.97	0.1759
GO:0070301	cellular response to hydrogen peroxide	7	3	0.97	0.17591
GO:0043281	regulation of cysteine-type endopeptidase activity involved in apoptotic process	281	44	39.02	0.17603
GO:0072528	pyrimidine-containing compound biosynthetic process	52	6	7.22	0.17641
GO:0030903	notochord development	304	39	42.22	0.1765
GO:0043589	skin morphogenesis	78	18	10.83	0.17663
GO:0010171	body morphogenesis	197	22	27.36	0.17666
GO:0031214	biomineral tissue development	162	18	22.5	0.17701
GO:0050910	detection of mechanical stimulus involved in sensory perception of sound	33	5	4.58	0.17737
GO:0040007	growth	1637	264	227.34	0.17764
GO:0009617	response to bacterium	277	62	38.47	0.1779
GO:0090311	regulation of protein deacetylation	24	5	3.33	0.178
GO:0048853	forebrain morphogenesis	39	6	5.42	0.17812
GO:0043010	camera-type eye development	1339	163	185.96	0.17817
GO:0072111	cell proliferation involved in kidney development	70	7	9.72	0.17845
GO:0046098	guanine metabolic process	6	0	0.83	0.17891
GO:0051085	chaperone mediated protein folding requiring cofactor	24	6	3.33	0.17965
GO:0061077	chaperone-mediated protein folding	24	6	3.33	0.17965
GO:0051272	positive regulation of cellular component movement	231	32	32.08	0.17981
GO:0033344	cholesterol efflux	13	3	1.81	0.17985
GO:0006013	mannose metabolic process	16	4	2.22	0.1799
GO:0048863	stem cell differentiation	1599	232	222.06	0.17997
GO:0071363	cellular response to growth factor stimulus	906	141	125.82	0.18025
GO:0009994	oocyte differentiation	210	36	29.16	0.18025
GO:0042110	T cell activation	335	59	46.52	0.18034
GO:0010830	regulation of myotube differentiation	71	16	9.86	0.18084
GO:0006099	tricarboxylic acid cycle	36	8	5	0.18107
GO:0060136	embryonic process involved in female pregnancy	9	1	1.25	0.18117
GO:0030101	natural killer cell activation	9	0	1.25	0.18117
GO:0061299	retina vasculature morphogenesis in camera-type eye	14	5	1.94	0.18138
GO:0010894	negative regulation of steroid biosynthetic process	18	3	2.5	0.18145
GO:0045939	negative regulation of steroid metabolic process	18	3	2.5	0.18145
GO:0050795	regulation of behavior	64	13	8.89	0.18168
GO:0007596	blood coagulation	199	37	27.64	0.1819
GO:0030509	BMP signaling pathway	598	76	83.05	0.18193
GO:2001257	regulation of cation channel activity	11	4	1.53	0.18194
GO:1903169	regulation of calcium ion transmembrane transport	11	4	1.53	0.18194
GO:1901019	regulation of calcium ion transmembrane transporter activity	11	4	1.53	0.18194
GO:0061004	pattern specification involved in kidney development	221	34	30.69	0.18195
GO:0072048	renal system pattern specification	221	34	30.69	0.18195
GO:0003365	establishment of cell polarity involved in ameboidal cell migration	9	4	1.25	0.18196
GO:0003379	establishment of cell polarity involved in gastrulation cell migration	9	4	1.25	0.18196
GO:0060251	regulation of glial cell proliferation	17	4	2.36	0.182
GO:0045927	positive regulation of growth	147	20	20.41	0.182
GO:0045185	maintenance of protein location	141	19	19.58	0.18212
GO:0071695	anatomical structure maturation	59	11	8.19	0.18226
GO:0060581	cell fate commitment involved in pattern specification	60	12	8.33	0.18229
GO:0019320	hexose catabolic process	17	5	2.36	0.18312
GO:0046365	monosaccharide catabolic process	17	5	2.36	0.18312
GO:0001738	morphogenesis of a polarized epithelium	273	36	37.91	0.18315
GO:0061515	myeloid cell development	224	34	31.11	0.1834
GO:0034109	homotypic cell-cell adhesion	26	5	3.61	0.18404
GO:0032680	regulation of tumor necrosis factor production	18	2	2.5	0.18438
GO:0032640	tumor necrosis factor production	18	2	2.5	0.18438
GO:0071706	tumor necrosis factor superfamily cytokine production	18	2	2.5	0.18438
GO:0044783	G1 DNA damage checkpoint	18	4	2.5	0.18456
GO:0044819	mitotic G1/S transition checkpoint	18	4	2.5	0.18456
GO:0031571	mitotic G1 DNA damage checkpoint	18	4	2.5	0.18456
GO:0052548	regulation of endopeptidase activity	430	71	59.72	0.18467
GO:0003406	retinal pigment epithelium development	38	7	5.28	0.18468
GO:0016125	sterol metabolic process	65	9	9.03	0.18487
GO:0051180	vitamin transport	11	0	1.53	0.18498
GO:0000018	regulation of DNA recombination	21	1	2.92	0.18543
GO:0070372	regulation of ERK1 and ERK2 cascade	174	33	24.16	0.18586
GO:0070932	histone H3 deacetylation	8	1	1.11	0.1862
GO:0070933	histone H4 deacetylation	8	1	1.11	0.1862
GO:0042306	regulation of protein import into nucleus	115	19	15.97	0.18621
GO:0022604	regulation of cell morphogenesis	742	107	103.05	0.18625
GO:0021761	limbic system development	197	21	27.36	0.1863
GO:0043433	negative regulation of sequence-specific DNA binding transcription factor activity	69	6	9.58	0.18677
GO:0043154	negative regulation of cysteine-type endopeptidase activity involved in apoptotic process	103	22	14.3	0.18697
GO:0051346	negative regulation of hydrolase activity	396	65	55	0.18717
GO:0031400	negative regulation of protein modification process	196	41	27.22	0.18727
GO:2000116	regulation of cysteine-type endopeptidase activity	289	46	40.14	0.18772
GO:0060678	dichotomous subdivision of terminal units involved in ureteric bud branching	23	6	3.19	0.18774
GO:0033338	medial fin development	102	14	14.17	0.18797
GO:0022407	regulation of cell-cell adhesion	159	17	22.08	0.1885
GO:0007501	mesodermal cell fate specification	73	11	10.14	0.18879
GO:0050773	regulation of dendrite development	91	13	12.64	0.18883
GO:0010498	proteasomal protein catabolic process	212	31	29.44	0.18888
GO:0071679	commissural neuron axon guidance	13	0	1.81	0.18915
GO:0061311	cell surface receptor signaling pathway involved in heart development	90	9	12.5	0.18923
GO:0021593	rhombomere morphogenesis	85	17	11.8	0.18973
GO:2000179	positive regulation of neural precursor cell proliferation	65	6	9.03	0.18975
GO:0048490	anterograde synaptic vesicle transport	15	5	2.08	0.18977
GO:0033059	cellular pigmentation	150	34	20.83	0.18985
GO:0032320	positive regulation of Ras GTPase activity	220	35	30.55	0.19028
GO:0021514	ventral spinal cord interneuron differentiation	128	26	17.78	0.19058
GO:0032720	negative regulation of tumor necrosis factor production	6	0	0.83	0.19109
GO:0048806	genitalia development	111	15	15.42	0.19125
GO:0006206	pyrimidine nucleobase metabolic process	28	3	3.89	0.19143
GO:0072106	regulation of ureteric bud formation	11	1	1.53	0.1921
GO:0032277	negative regulation of gonadotropin secretion	6	0	0.83	0.19262
GO:0000413	protein peptidyl-prolyl isomerization	26	5	3.61	0.1928
GO:0048207	vesicle targeting, rough ER to cis-Golgi	11	0	1.53	0.19286
GO:0048208	COPII vesicle coating	11	0	1.53	0.19286
GO:0035136	forelimb morphogenesis	93	12	12.92	0.19289
GO:0000122	negative regulation of transcription from RNA polymerase II promoter	797	115	110.68	0.19325
GO:0044702	single organism reproductive process	1224	208	169.99	0.19333
GO:0065009	regulation of molecular function	3348	516	464.96	0.19346
GO:0045737	positive regulation of cyclin-dependent protein serine/threonine kinase activity	15	6	2.08	0.19356
GO:0006221	pyrimidine nucleotide biosynthetic process	48	5	6.67	0.19372
GO:0022037	metencephalon development	167	26	23.19	0.19383
GO:0009953	dorsal/ventral pattern formation	1022	126	141.93	0.19399
GO:0000819	sister chromatid segregation	58	4	8.05	0.19407
GO:0050869	negative regulation of B cell activation	19	4	2.64	0.1941
GO:0071902	positive regulation of protein serine/threonine kinase activity	304	55	42.22	0.19427
GO:0003157	endocardium development	60	9	8.33	0.19434
GO:1902117	positive regulation of organelle assembly	19	4	2.64	0.19446
GO:0035295	tube development	2435	337	338.16	0.19447
GO:0034341	response to interferon-gamma	11	2	1.53	0.19496
GO:0045429	positive regulation of nitric oxide biosynthetic process	11	2	1.53	0.19496
GO:0044344	cellular response to fibroblast growth factor stimulus	424	64	58.88	0.19537
GO:0071774	response to fibroblast growth factor	424	64	58.88	0.19537
GO:0016447	somatic recombination of immunoglobulin gene segments	31	1	4.31	0.19545
GO:0050777	negative regulation of immune response	27	4	3.75	0.1955
GO:0045880	positive regulation of smoothened signaling pathway	25	5	3.47	0.19562
GO:0032536	regulation of cell projection size	6	1	0.83	0.1958
GO:0036230	granulocyte activation	22	6	3.06	0.19599
GO:0042744	hydrogen peroxide catabolic process	6	3	0.83	0.196
GO:0016485	protein processing	201	29	27.91	0.19601
GO:0061312	BMP signaling pathway involved in heart development	67	8	9.3	0.19682
GO:1901213	regulation of transcription from RNA polymerase II promoter involved in heart development	67	8	9.3	0.19682
GO:0050727	regulation of inflammatory response	83	11	11.53	0.19722
GO:0007412	axon target recognition	26	6	3.61	0.19729
GO:0001714	endodermal cell fate specification	119	20	16.53	0.19747
GO:0042147	retrograde transport, endosome to Golgi	12	2	1.67	0.19753
GO:0005978	glycogen biosynthetic process	46	5	6.39	0.19781
GO:0009250	glucan biosynthetic process	46	5	6.39	0.19781
GO:0046545	development of primary female sexual characteristics	188	29	26.11	0.1981
GO:0007565	female pregnancy	48	12	6.67	0.19832
GO:0032369	negative regulation of lipid transport	8	1	1.11	0.19833
GO:0051492	regulation of stress fiber assembly	9	2	1.25	0.19848
GO:0051496	positive regulation of stress fiber assembly	9	2	1.25	0.19848
GO:0008593	regulation of Notch signaling pathway	134	27	18.61	0.19853
GO:0032321	positive regulation of Rho GTPase activity	103	20	14.3	0.19866
GO:0046552	photoreceptor cell fate commitment	23	3	3.19	0.19896
GO:0050482	arachidonic acid secretion	10	3	1.39	0.19902
GO:0072013	glomus development	171	16	23.75	0.19904
GO:0071599	otic vesicle development	275	36	38.19	0.19913
GO:0039018	nephrostome development	41	2	5.69	0.19935
GO:0035475	angioblast cell migration involved in selective angioblast sprouting	27	7	3.75	0.19971
GO:0006429	leucyl-tRNA aminoacylation	8	3	1.11	0.20047
GO:0045834	positive regulation of lipid metabolic process	63	10	8.75	0.20053
GO:0072488	ammonium transmembrane transport	11	0	1.53	0.2009
GO:0065001	specification of axis polarity	15	3	2.08	0.20106
GO:0007141	male meiosis I	25	6	3.47	0.20107
GO:0021559	trigeminal nerve development	36	1	5	0.20252
GO:0042742	defense response to bacterium	177	30	24.58	0.2029
GO:0048589	developmental growth	1175	203	163.18	0.20302
GO:0003351	epithelial cilium movement	33	5	4.58	0.20303
GO:2000177	regulation of neural precursor cell proliferation	92	12	12.78	0.20315
GO:0072170	metanephric tubule development	20	6	2.78	0.20319
GO:0072243	metanephric nephron epithelium development	20	6	2.78	0.20319
GO:0072234	metanephric nephron tubule development	20	6	2.78	0.20319
GO:0072207	metanephric epithelium development	20	6	2.78	0.20319
GO:0008354	germ cell migration	114	22	15.83	0.20334
GO:0007159	leukocyte cell-cell adhesion	8	0	1.11	0.2035
GO:0035737	injection of substance in to other organism	71	11	9.86	0.20356
GO:0035738	envenomation resulting in modification of morphology or physiology of other organism	71	11	9.86	0.20356
GO:0048897	myelination of lateral line nerve axons	57	11	7.92	0.20359
GO:0048938	lateral line nerve glial cell morphogenesis involved in differentiation	57	11	7.92	0.20359
GO:0042471	ear morphogenesis	656	82	91.1	0.20392
GO:0070849	response to epidermal growth factor	34	2	4.72	0.20395
GO:0072203	cell proliferation involved in metanephros development	46	5	6.39	0.20413
GO:0010522	regulation of calcium ion transport into cytosol	26	7	3.61	0.20421
GO:0071840	cellular component organization or biogenesis	10879	1514	1510.84	0.20421
GO:0006066	alcohol metabolic process	195	25	27.08	0.20422
GO:0030183	B cell differentiation	56	6	7.78	0.20428
GO:0048729	tissue morphogenesis	3148	453	437.18	0.20437
GO:0000902	cell morphogenesis	3385	513	470.1	0.20465
GO:0009566	fertilization	92	14	12.78	0.20509
GO:0015031	protein transport	1956	284	271.64	0.20524
GO:0043085	positive regulation of catalytic activity	1364	219	189.43	0.20559
GO:0048596	embryonic camera-type eye morphogenesis	214	28	29.72	0.20592
GO:0009070	serine family amino acid biosynthetic process	12	4	1.67	0.20596
GO:0043984	histone H4-K16 acetylation	11	1	1.53	0.20597
GO:0046660	female sex differentiation	224	35	31.11	0.20622
GO:0048609	multicellular organismal reproductive process	802	128	111.38	0.20632
GO:0048814	regulation of dendrite morphogenesis	72	7	10	0.20635
GO:0060711	labyrinthine layer development	31	8	4.31	0.20637
GO:0048699	generation of neurons	4294	616	596.34	0.20663
GO:0043244	regulation of protein complex disassembly	78	7	10.83	0.20687
GO:2001244	positive regulation of intrinsic apoptotic signaling pathway	28	5	3.89	0.20699
GO:0016445	somatic diversification of immunoglobulins	39	1	5.42	0.20703
GO:0050848	regulation of calcium-mediated signaling	11	2	1.53	0.20711
GO:0006677	glycosylceramide metabolic process	8	0	1.11	0.20769
GO:1900094	regulation of transcription from RNA polymerase II promoter involved in determination of left/right symmetry	121	8	16.8	0.20783
GO:0021523	somatic motor neuron differentiation	78	12	10.83	0.20805
GO:0007409	axonogenesis	1788	275	248.31	0.20857
GO:0006417	regulation of translation	378	35	52.5	0.20861
GO:0070665	positive regulation of leukocyte proliferation	21	2	2.92	0.20911
GO:0050671	positive regulation of lymphocyte proliferation	21	2	2.92	0.20911
GO:0032946	positive regulation of mononuclear cell proliferation	21	2	2.92	0.20911
GO:0045669	positive regulation of osteoblast differentiation	59	8	8.19	0.20938
GO:0048147	negative regulation of fibroblast proliferation	9	1	1.25	0.20961
GO:0008406	gonad development	364	59	50.55	0.20987
GO:0042308	negative regulation of protein import into nucleus	33	8	4.58	0.21003
GO:0090317	negative regulation of intracellular protein transport	33	8	4.58	0.21003
GO:0032941	secretion by tissue	19	5	2.64	0.21045
GO:0032786	positive regulation of DNA-templated transcription, elongation	22	1	3.06	0.21054
GO:0007179	transforming growth factor beta receptor signaling pathway	166	21	23.05	0.2108
GO:0022615	protein to membrane docking	7	0	0.97	0.21121
GO:0035413	positive regulation of catenin import into nucleus	17	2	2.36	0.21137
GO:0030595	leukocyte chemotaxis	71	13	9.86	0.21138
GO:0046100	hypoxanthine metabolic process	10	0	1.39	0.21152
GO:0018202	peptidyl-histidine modification	8	1	1.11	0.21156
GO:0001525	angiogenesis	1253	187	174.01	0.21164
GO:0035115	embryonic forelimb morphogenesis	88	10	12.22	0.21164
GO:0055059	asymmetric neuroblast division	73	10	10.14	0.21173
GO:0098722	asymmetric stem cell division	73	10	10.14	0.21173
GO:0045196	establishment or maintenance of neuroblast polarity	73	10	10.14	0.21173
GO:0045200	establishment of neuroblast polarity	73	10	10.14	0.21173
GO:0030240	skeletal muscle thin filament assembly	34	2	4.72	0.21201
GO:0051983	regulation of chromosome segregation	48	9	6.67	0.21211
GO:0044728	DNA methylation or demethylation	56	10	7.78	0.21215
GO:0032504	multicellular organism reproduction	813	130	112.91	0.21226
GO:0044419	interspecies interaction between organisms	51	8	7.08	0.21257
GO:0044403	symbiosis, encompassing mutualism through parasitism	51	8	7.08	0.21257
GO:2001252	positive regulation of chromosome organization	50	8	6.94	0.21291
GO:0052646	alditol phosphate metabolic process	20	8	2.78	0.21291
GO:0071816	tail-anchored membrane protein insertion into ER membrane	7	1	0.97	0.21294
GO:0015711	organic anion transport	263	36	36.52	0.21316
GO:0033337	dorsal fin development	8	1	1.11	0.21317
GO:0030323	respiratory tube development	368	57	51.11	0.21476
GO:0030324	lung development	368	57	51.11	0.21476
GO:0009954	proximal/distal pattern formation	188	30	26.11	0.21486
GO:0042364	water-soluble vitamin biosynthetic process	7	2	0.97	0.21508
GO:0048859	formation of anatomical boundary	78	13	10.83	0.21509
GO:0034765	regulation of ion transmembrane transport	379	49	52.63	0.21525
GO:0048008	platelet-derived growth factor receptor signaling pathway	42	9	5.83	0.2153
GO:0010591	regulation of lamellipodium assembly	7	2	0.97	0.21539
GO:0005976	polysaccharide metabolic process	93	10	12.92	0.21541
GO:0060319	primitive erythrocyte differentiation	13	1	1.81	0.21546
GO:0007051	spindle organization	367	59	50.97	0.2159
GO:0034332	adherens junction organization	157	15	21.8	0.21592
GO:0007187	G-protein coupled receptor signaling pathway, coupled to cyclic nucleotide second messenger	185	21	25.69	0.21594
GO:0048489	synaptic vesicle transport	68	16	9.44	0.21596
GO:0097480	establishment of synaptic vesicle localization	68	16	9.44	0.21596
GO:0097479	synaptic vesicle localization	68	16	9.44	0.21596
GO:0042102	positive regulation of T cell proliferation	6	0	0.83	0.21647
GO:0060052	neurofilament cytoskeleton organization	18	4	2.5	0.21656
GO:0071880	adenylate cyclase-activating adrenergic receptor signaling pathway	7	1	0.97	0.21668
GO:0042149	cellular response to glucose starvation	16	4	2.22	0.2167
GO:0008637	apoptotic mitochondrial changes	46	7	6.39	0.21677
GO:0051248	negative regulation of protein metabolic process	390	63	54.16	0.21735
GO:0006298	mismatch repair	26	1	3.61	0.21758
GO:0051648	vesicle localization	209	40	29.03	0.21767
GO:0051235	maintenance of location	232	34	32.22	0.21769
GO:0014816	skeletal muscle satellite cell differentiation	7	1	0.97	0.21801
GO:0014841	skeletal muscle satellite cell proliferation	7	1	0.97	0.21801
[truncated: 3,655 more rows]

## Sheet: GO terms for CC
GO.ID	Term	Annotated	Significant	Expected	KS
GO:0005839	proteasome core complex	40	30	5.52	1.2e-09
GO:0019773	proteasome core complex, alpha-subunit complex	17	13	2.35	1.9e-07
GO:0022624	proteasome accessory complex	40	26	5.52	2.3e-07
GO:0033180	proton-transporting V-type ATPase, V1 domain	29	15	4	2.5e-06
GO:0005783	endoplasmic reticulum	1285	240	177.35	5.5e-06
GO:0005829	cytosol	1169	209	161.34	2.3e-05
GO:0000276	mitochondrial proton-transporting ATP synthase complex, coupling factor F(o)	9	6	1.24	2.6e-05
GO:0005838	proteasome regulatory particle	8	7	1.1	3.1e-05
GO:0005746	mitochondrial respiratory chain	25	13	3.45	0.00014
GO:1990204	oxidoreductase complex	33	16	4.55	0.00016
GO:0005737	cytoplasm	13026	2048	1797.8	0.00025
GO:0005834	heterotrimeric G-protein complex	64	18	8.83	0.00026
GO:0070069	cytochrome complex	6	4	0.83	0.00039
GO:0031902	late endosome membrane	57	18	7.87	0.00088
GO:0044430	cytoskeletal part	3175	457	438.2	0.00102
GO:0005768	endosome	824	168	113.73	0.00145
GO:0033179	proton-transporting V-type ATPase, V0 domain	31	12	4.28	0.00198
GO:0005840	ribosome	299	38	41.27	0.00231
GO:0044432	endoplasmic reticulum part	762	128	105.17	0.00283
GO:0071986	Ragulator complex	9	6	1.24	0.00313
GO:0001673	male germ cell nucleus	13	7	1.79	0.00346
GO:0033178	proton-transporting two-sector ATPase complex, catalytic domain	42	21	5.8	0.00433
GO:0016469	proton-transporting two-sector ATPase complex	84	41	11.59	0.00445
GO:0030496	midbody	204	42	28.16	0.00452
GO:0019866	organelle inner membrane	294	68	40.58	0.00529
GO:0015630	microtubule cytoskeleton	2247	334	310.12	0.00529
GO:0036128	CatSper complex	11	6	1.52	0.00557
GO:0044429	mitochondrial part	517	116	71.35	0.00664
GO:0032301	MutSalpha complex	6	0	0.83	0.00809
GO:0005579	membrane attack complex	15	7	2.07	0.00864
GO:0044437	vacuolar part	130	30	17.94	0.00876
GO:0005689	U12-type spliceosomal complex	17	8	2.35	0.00906
GO:0005739	mitochondrion	1056	221	145.75	0.00969
GO:0034045	pre-autophagosomal structure membrane	6	0	0.83	0.01013
GO:0045335	phagocytic vesicle	108	21	14.91	0.01067
GO:0001741	XY body	6	2	0.83	0.01078
GO:0005576	extracellular region	2366	323	326.55	0.01082
GO:0005743	mitochondrial inner membrane	270	66	37.26	0.01148
GO:0042175	nuclear outer membrane-endoplasmic reticulum membrane network	626	103	86.4	0.01149
GO:0005789	endoplasmic reticulum membrane	612	100	84.47	0.01173
GO:0000118	histone deacetylase complex	42	10	5.8	0.01314
GO:0005774	vacuolar membrane	123	27	16.98	0.01413
GO:0030532	small nuclear ribonucleoprotein complex	22	9	3.04	0.0144
GO:0043034	costamere	14	2	1.93	0.01445
GO:0055037	recycling endosome	135	24	18.63	0.01456
GO:0000323	lytic vacuole	203	42	28.02	0.015
GO:0005794	Golgi apparatus	1351	221	186.46	0.0173
GO:0005945	6-phosphofructokinase complex	16	4	2.21	0.01807
GO:0005833	hemoglobin complex	27	1	3.73	0.01819
GO:0033176	proton-transporting V-type ATPase complex	62	29	8.56	0.0189
GO:0009331	glycerol-3-phosphate dehydrogenase complex	11	6	1.52	0.01893
GO:0044424	intracellular part	20068	2898	2769.71	0.01912
GO:0005874	microtubule	539	74	74.39	0.02032
GO:0030139	endocytic vesicle	216	44	29.81	0.0204
GO:0000974	Prp19 complex	17	7	2.35	0.02041
GO:0016272	prefoldin complex	11	6	1.52	0.02091
GO:0008023	transcription elongation factor complex	50	4	6.9	0.02162
GO:0000407	pre-autophagosomal structure	11	0	1.52	0.02166
GO:0005753	mitochondrial proton-transporting ATP synthase complex	12	7	1.66	0.02321
GO:0071797	LUBAC complex	10	2	1.38	0.0238
GO:0044445	cytosolic part	231	26	31.88	0.02465
GO:0005773	vacuole	246	54	33.95	0.02584
GO:0005764	lysosome	201	40	27.74	0.02654
GO:0005740	mitochondrial envelope	426	92	58.8	0.02654
GO:0000015	phosphopyruvate hydratase complex	9	0	1.24	0.02729
GO:0005637	nuclear inner membrane	24	2	3.31	0.029
GO:0016580	Sin3 complex	9	3	1.24	0.02919
GO:0070822	Sin3-type complex	9	3	1.24	0.02919
GO:0072669	tRNA-splicing ligase complex	9	1	1.24	0.03055
GO:0030118	clathrin coat	72	19	9.94	0.03056
GO:0005788	endoplasmic reticulum lumen	88	19	12.15	0.0308
GO:0000803	sex chromosome	10	3	1.38	0.03224
GO:0043227	membrane-bounded organelle	13829	2028	1908.63	0.0336
GO:0045121	membrane raft	112	31	15.46	0.03537
GO:0005759	mitochondrial matrix	112	28	15.46	0.03635
GO:0016471	vacuolar proton-transporting V-type ATPase complex	27	8	3.73	0.03704
GO:0042613	MHC class II protein complex	6	2	0.83	0.03775
GO:0005802	trans-Golgi network	144	25	19.87	0.03786
GO:0030119	AP-type membrane coat adaptor complex	49	15	6.76	0.04121
GO:0044444	cytoplasmic part	9255	1489	1277.34	0.04153
GO:0043226	organelle	17046	2416	2352.63	0.04223
GO:0015030	Cajal body	20	2	2.76	0.04339
GO:0043231	intracellular membrane-bounded organelle	13639	1996	1882.41	0.04411
GO:0030131	clathrin adaptor complex	45	14	6.21	0.04423
GO:0033202	DNA helicase complex	12	3	1.66	0.04492
GO:0097346	INO80-type complex	12	3	1.66	0.04492
GO:0031011	Ino80 complex	12	3	1.66	0.04492
GO:0034663	endoplasmic reticulum chaperone complex	8	4	1.1	0.04503
GO:0043229	intracellular organelle	16867	2395	2327.92	0.04687
GO:0000791	euchromatin	22	2	3.04	0.04934
GO:0072546	ER membrane protein complex	20	1	2.76	0.04976
GO:0044421	extracellular region part	1130	150	155.96	0.0519
GO:0010008	endosome membrane	402	84	55.48	0.05223
GO:0044440	endosomal part	402	84	55.48	0.05223
GO:0070695	FHF complex	17	4	2.35	0.05298
GO:0005607	laminin-2 complex	8	3	1.1	0.05362
GO:0043257	laminin-8 complex	8	3	1.1	0.05362
GO:0043259	laminin-10 complex	8	3	1.1	0.05362
GO:0070993	translation preinitiation complex	40	2	5.52	0.05574
GO:0005852	eukaryotic translation initiation factor 3 complex	40	2	5.52	0.05574
GO:0000796	condensin complex	9	1	1.24	0.06036
GO:0016514	SWI/SNF complex	11	4	1.52	0.06203
GO:0030915	Smc5-Smc6 complex	9	2	1.24	0.06487
GO:0030117	membrane coat	122	28	16.84	0.06649
GO:0048475	coated membrane	122	28	16.84	0.06649
GO:0035098	ESC/E(Z) complex	26	6	3.59	0.06701
GO:0044215	other organism	6	3	0.83	0.07088
GO:0043245	extraorganismal space	6	3	0.83	0.07088
GO:0005634	nucleus	8335	1068	1150.37	0.07393
GO:0031082	BLOC complex	29	7	4	0.07518
GO:0031083	BLOC-1 complex	29	7	4	0.07518
GO:0016529	sarcoplasmic reticulum	46	7	6.35	0.07595
GO:0008537	proteasome activator complex	6	3	0.83	0.07635
GO:0005581	collagen trimer	241	30	33.26	0.07639
GO:0071782	endoplasmic reticulum tubular network	62	10	8.56	0.07687
GO:0070419	nonhomologous end joining complex	8	0	1.1	0.07803
GO:0070461	SAGA-type complex	11	1	1.52	0.07895
GO:0030132	clathrin coat of coated pit	22	7	3.04	0.07999
GO:0033116	endoplasmic reticulum-Golgi intermediate compartment membrane	24	4	3.31	0.08084
GO:0005615	extracellular space	495	68	68.32	0.0818
GO:0031966	mitochondrial membrane	401	85	55.34	0.08248
GO:0071013	catalytic step 2 spliceosome	40	11	5.52	0.08307
GO:0005814	centriole	30	4	4.14	0.08337
GO:0043234	protein complex	6964	1023	961.15	0.08713
GO:0045259	proton-transporting ATP synthase complex	17	8	2.35	0.08762
GO:0019012	virion	54	11	7.45	0.08899
GO:0044450	microtubule organizing center part	67	7	9.25	0.08995
GO:0031464	Cul4A-RING E3 ubiquitin ligase complex	10	1	1.38	0.08997
GO:0000313	organellar ribosome	19	7	2.62	0.09039
GO:0005761	mitochondrial ribosome	19	7	2.62	0.09039
GO:0030863	cortical cytoskeleton	90	16	12.42	0.09134
GO:0016282	eukaryotic 43S preinitiation complex	37	2	5.11	0.09138
GO:0008250	oligosaccharyltransferase complex	13	5	1.79	0.09379
GO:0005819	spindle	602	87	83.09	0.09415
GO:0005791	rough endoplasmic reticulum	21	3	2.9	0.09929
GO:0005901	caveola	49	13	6.76	0.09988
GO:0034399	nuclear periphery	93	18	12.84	0.10087
GO:0042611	MHC protein complex	9	2	1.24	0.10259
GO:0031225	anchored component of membrane	86	6	11.87	0.1033
GO:0033588	Elongator holoenzyme complex	6	0	0.83	0.10333
GO:0030141	secretory granule	164	23	22.63	0.10374
GO:0009898	cytoplasmic side of plasma membrane	23	3	3.17	0.10556
GO:0005952	cAMP-dependent protein kinase complex	10	0	1.38	0.10585
GO:0000228	nuclear chromosome	171	30	23.6	0.10657
GO:0033290	eukaryotic 48S preinitiation complex	36	2	4.97	0.10734
GO:0070652	HAUS complex	9	4	1.24	0.10813
GO:0016528	sarcoplasm	48	7	6.62	0.10889
GO:0005778	peroxisomal membrane	44	4	6.07	0.10905
GO:0031903	microbody membrane	44	4	6.07	0.10905
GO:0044448	cell cortex part	273	40	37.68	0.11013
GO:0000145	exocyst	83	12	11.46	0.11039
GO:0005921	gap junction	94	15	12.97	0.11096
GO:0005916	fascia adherens	19	1	2.62	0.11611
GO:0005793	endoplasmic reticulum-Golgi intermediate compartment	57	10	7.87	0.11668
GO:0005765	lysosomal membrane	82	16	11.32	0.11871
GO:0005942	phosphatidylinositol 3-kinase complex	37	6	5.11	0.11938
GO:0048471	perinuclear region of cytoplasm	390	57	53.83	0.12278
GO:0030867	rough endoplasmic reticulum membrane	16	2	2.21	0.12417
GO:0098589	membrane region	971	162	134.01	0.12735
GO:0032154	cleavage furrow	185	30	25.53	0.12783
GO:0097610	cell surface furrow	185	30	25.53	0.12783
GO:0051233	spindle midzone	49	10	6.76	0.12793
GO:0033018	sarcoplasmic reticulum lumen	13	1	1.79	0.12917
GO:0005876	spindle microtubule	148	22	20.43	0.13243
GO:0072686	mitotic spindle	48	10	6.62	0.13352
GO:0008180	COP9 signalosome	56	14	7.73	0.13508
GO:0070937	CRD-mediated mRNA stability complex	18	5	2.48	0.13522
GO:0072372	primary cilium	278	37	38.37	0.13679
GO:0031514	motile cilium	7	1	0.97	0.13736
GO:0036064	ciliary basal body	21	3	2.9	0.1374
GO:0071203	WASH complex	19	5	2.62	0.1434
GO:0035097	histone methyltransferase complex	94	16	12.97	0.14658
GO:0016593	Cdc73/Paf1 complex	13	0	1.79	0.14851
GO:0015935	small ribosomal subunit	53	3	7.31	0.14922
GO:0000795	synaptonemal complex	27	7	3.73	0.14944
GO:0000502	proteasome complex	123	67	16.98	0.15012
GO:0055038	recycling endosome membrane	48	11	6.62	0.15224
GO:0030663	COPI-coated vesicle membrane	18	2	2.48	0.1534
GO:0030137	COPI-coated vesicle	18	2	2.48	0.1534
GO:0005585	collagen type II trimer	8	1	1.1	0.15385
GO:0031527	filopodium membrane	24	8	3.31	0.15404
GO:0044420	extracellular matrix part	213	22	29.4	0.16014
GO:0005827	polar microtubule	12	0	1.66	0.16029
GO:0030864	cortical actin cytoskeleton	34	6	4.69	0.16361
GO:0016363	nuclear matrix	78	15	10.77	0.16368
GO:0044391	ribosomal subunit	114	8	15.73	0.16398
GO:0033177	proton-transporting two-sector ATPase complex, proton-transporting domain	41	19	5.66	0.16486
GO:0045261	proton-transporting ATP synthase complex, catalytic core F(1)	7	1	0.97	0.16488
GO:0045263	proton-transporting ATP synthase complex, coupling factor F(o)	10	7	1.38	0.16507
GO:0008305	integrin complex	100	16	13.8	0.16841
GO:0098636	protein complex involved in cell adhesion	100	16	13.8	0.16841
GO:0070469	respiratory chain	31	16	4.28	0.17166
GO:0005622	intracellular	20915	2991	2886.61	0.1731
GO:0005770	late endosome	96	27	13.25	0.17506
GO:0098562	cytoplasmic side of membrane	29	3	4	0.17585
GO:0001939	female pronucleus	11	0	1.52	0.17895
GO:0031371	ubiquitin conjugating enzyme complex	18	2	2.48	0.17911
GO:0031227	intrinsic component of endoplasmic reticulum membrane	99	13	13.66	0.18044
GO:0034708	methyltransferase complex	96	16	13.25	0.18504
GO:0005813	centrosome	370	61	51.07	0.18696
GO:0032133	chromosome passenger complex	70	12	9.66	0.19482
GO:0005925	focal adhesion	100	14	13.8	0.1953
GO:0090544	BAF-type complex	16	4	2.21	0.19847
GO:0005861	troponin complex	36	3	4.97	0.19931
GO:0044454	nuclear chromosome part	148	28	20.43	0.20584
GO:0072379	ER membrane insertion complex	7	1	0.97	0.20593
GO:0071818	BAT3 complex	7	1	0.97	0.20593
GO:0031463	Cul3-RING ubiquitin ligase complex	36	1	4.97	0.20625
GO:0070603	SWI/SNF superfamily-type complex	38	8	5.24	0.20838
GO:0000790	nuclear chromatin	83	13	11.46	0.21064
GO:0044615	nuclear pore nuclear basket	6	0	0.83	0.21188
GO:0030904	retromer complex	7	3	0.97	0.21324
GO:0016234	inclusion body	15	2	2.07	0.21537
GO:0034703	cation channel complex	251	26	34.64	0.22116
GO:0005657	replication fork	45	7	6.21	0.22238
GO:0005883	neurofilament	22	4	3.04	0.22465
GO:0005875	microtubule associated complex	189	26	26.09	0.22517
GO:0042555	MCM complex	31	2	4.28	0.22774
GO:0017053	transcriptional repressor complex	99	10	13.66	0.22972
GO:0008290	F-actin capping protein complex	7	0	0.97	0.23046
GO:0005801	cis-Golgi network	11	1	1.52	0.23076
GO:0000794	condensed nuclear chromosome	38	8	5.24	0.23082
GO:0001917	photoreceptor inner segment	19	0	2.62	0.2329
GO:0000315	organellar large ribosomal subunit	8	3	1.1	0.23516
GO:0005762	mitochondrial large ribosomal subunit	8	3	1.1	0.23516
GO:0030529	ribonucleoprotein complex	997	124	137.6	0.23518
GO:0031594	neuromuscular junction	50	6	6.9	0.23694
GO:0042734	presynaptic membrane	13	4	1.79	0.23966
GO:0044291	cell-cell contact zone	43	6	5.93	0.24043
GO:0065010	extracellular membrane-bounded organelle	86	16	11.87	0.24542
GO:0043230	extracellular organelle	86	16	11.87	0.24542
GO:0005885	Arp2/3 protein complex	16	4	2.21	0.24747
GO:0032994	protein-lipid complex	26	3	3.59	0.248
GO:0032593	insulin-responsive compartment	85	11	11.73	0.24919
GO:0032591	dendritic spine membrane	6	0	0.83	0.25517
GO:0016605	PML body	95	9	13.11	0.25639
GO:0005815	microtubule organizing center	685	102	94.54	0.25647
GO:0043296	apical junction complex	141	24	19.46	0.25653
GO:0033503	HULC complex	10	1	1.38	0.26162
GO:0031332	RNAi effector complex	30	1	4.14	0.26183
GO:0016442	RISC complex	30	1	4.14	0.26183
GO:0005719	nuclear euchromatin	8	1	1.1	0.26363
GO:0000922	spindle pole	175	20	24.15	0.26382
GO:0035101	FACT complex	13	3	1.79	0.26839
GO:0001772	immunological synapse	24	5	3.31	0.26911
GO:0005853	eukaryotic translation elongation factor 1 complex	18	0	2.48	0.26983
GO:0005868	cytoplasmic dynein complex	18	2	2.48	0.27274
GO:0005938	cell cortex	703	103	97.03	0.27452
GO:0045120	pronucleus	13	0	1.79	0.27599
GO:0070552	BRISC complex	7	1	0.97	0.2778
GO:0044327	dendritic spine head	15	5	2.07	0.27854
GO:0032991	macromolecular complex	8007	1139	1105.1	0.27912
GO:0034706	sodium channel complex	51	4	7.04	0.28046
GO:0001518	voltage-gated sodium channel complex	51	4	7.04	0.28046
GO:0000428	DNA-directed RNA polymerase complex	95	9	13.11	0.28162
GO:0030880	RNA polymerase complex	95	9	13.11	0.28162
GO:0055029	nuclear DNA-directed RNA polymerase complex	95	9	13.11	0.28162
GO:1990391	DNA repair complex	28	0	3.86	0.2817
GO:0034358	plasma lipoprotein particle	25	3	3.45	0.28193
GO:0043204	perikaryon	15	1	2.07	0.28419
GO:0030176	integral component of endoplasmic reticulum membrane	92	12	12.7	0.28646
GO:0031090	organelle membrane	2675	418	369.19	0.2882
GO:0005578	proteinaceous extracellular matrix	488	54	67.35	0.28948
GO:0032040	small-subunit processome	10	0	1.38	0.29444
GO:0033596	TSC1-TSC2 complex	16	3	2.21	0.29459
GO:0090533	cation-transporting ATPase complex	14	1	1.93	0.29491
GO:0005890	sodium:potassium-exchanging ATPase complex	14	1	1.93	0.29491
GO:0005790	smooth endoplasmic reticulum	7	3	0.97	0.29506
GO:0005730	nucleolus	284	42	39.2	0.29595
GO:0070062	extracellular vesicular exosome	82	15	11.32	0.29643
GO:0009925	basal plasma membrane	13	1	1.79	0.29728
GO:0005758	mitochondrial intermembrane space	21	4	2.9	0.29884
GO:0031970	organelle envelope lumen	21	4	2.9	0.29884
GO:0098588	bounding membrane of organelle	1679	261	231.73	0.29935
GO:0000242	pericentriolar material	27	3	3.73	0.2999
GO:0016327	apicolateral plasma membrane	6	0	0.83	0.30233
GO:0019898	extrinsic component of membrane	167	33	23.05	0.30358
GO:0032153	cell division site	215	33	29.67	0.30442
GO:0032155	cell division site part	215	33	29.67	0.30442
GO:0014704	intercalated disc	42	5	5.8	0.30799
GO:0016591	DNA-directed RNA polymerase II, holoenzyme	92	8	12.7	0.31481
GO:0005665	DNA-directed RNA polymerase II, core complex	9	2	1.24	0.31662
GO:0032039	integrator complex	11	2	1.52	0.31811
GO:0098687	chromosomal region	21	2	2.9	0.31987
GO:0000781	chromosome, telomeric region	21	2	2.9	0.31987
GO:0030126	COPI vesicle coat	15	0	2.07	0.32015
GO:0035869	ciliary transition zone	21	3	2.9	0.32466
GO:0044438	microbody part	49	6	6.76	0.32762
GO:0044439	peroxisomal part	49	6	6.76	0.32762
GO:0031528	microvillus membrane	18	0	2.48	0.32901
GO:0005924	cell-substrate adherens junction	105	14	14.49	0.32936
GO:0030055	cell-substrate junction	105	14	14.49	0.32936
GO:0031012	extracellular matrix	588	76	81.15	0.33079
GO:0044427	chromosomal part	1178	153	162.58	0.33254
GO:0005604	basement membrane	114	19	15.73	0.33983
GO:0031965	nuclear membrane	132	15	18.22	0.34066
GO:0009986	cell surface	504	84	69.56	0.34144
GO:0032391	photoreceptor connecting cilium	20	3	2.76	0.34293
GO:0000776	kinetochore	167	20	23.05	0.34353
GO:0000177	cytoplasmic exosome (RNase complex)	12	4	1.66	0.34504
GO:1902494	catalytic complex	858	103	118.42	0.34529
GO:0005672	transcription factor TFIIA complex	7	2	0.97	0.34726
GO:0005915	zonula adherens	13	1	1.79	0.34855
GO:0097223	sperm part	25	4	3.45	0.3488
GO:0032281	alpha-amino-3-hydroxy-5-methyl-4-isoxazolepropionic acid selective glutamate receptor complex	18	2	2.48	0.35313
GO:0005697	telomerase holoenzyme complex	6	2	0.83	0.35407
GO:0005583	fibrillar collagen trimer	72	3	9.94	0.35493
GO:0031968	organelle outer membrane	111	20	15.32	0.35714
GO:0071546	pi-body	7	2	0.97	0.36353
GO:0044798	nuclear transcription factor complex	56	4	7.73	0.36942
GO:0019867	outer membrane	117	20	16.15	0.37794
GO:0030666	endocytic vesicle membrane	26	4	3.59	0.38233
GO:0031967	organelle envelope	1005	172	138.71	0.38492
GO:0016011	dystroglycan complex	10	3	1.38	0.3867
GO:0016012	sarcoglycan complex	10	3	1.38	0.3867
GO:0031672	A band	29	2	4	0.38928
GO:0005782	peroxisomal matrix	7	2	0.97	0.38997
GO:0031907	microbody lumen	7	2	0.97	0.38997
GO:0090575	RNA polymerase II transcription factor complex	55	4	7.59	0.39401
GO:0008328	ionotropic glutamate receptor complex	25	2	3.45	0.3993
GO:0031975	envelope	1011	172	139.53	0.4016
GO:0032300	mismatch repair complex	12	0	1.66	0.40164
GO:0032389	MutLalpha complex	6	0	0.83	0.40188
GO:0005943	phosphatidylinositol 3-kinase complex, class IA	7	1	0.97	0.40445
GO:0001669	acrosomal vesicle	24	4	3.31	0.40728
GO:0030134	ER to Golgi transport vesicle	31	5	4.28	0.41159
GO:0005913	cell-cell adherens junction	61	7	8.42	0.41236
GO:0015629	actin cytoskeleton	1350	185	186.32	0.41376
GO:0046930	pore complex	95	11	13.11	0.41948
GO:0045178	basal part of cell	23	1	3.17	0.42159
GO:0000220	vacuolar proton-transporting V-type ATPase, V0 domain	18	3	2.48	0.42396
GO:0005744	mitochondrial inner membrane presequence translocase complex	6	2	0.83	0.42508
GO:0005606	laminin-1 complex	28	6	3.86	0.42586
GO:0005811	lipid particle	77	8	10.63	0.42613
GO:0035253	ciliary rootlet	33	4	4.55	0.42765
GO:0031362	anchored component of external side of plasma membrane	10	1	1.38	0.42795
GO:0031233	intrinsic component of external side of plasma membrane	10	1	1.38	0.42795
GO:0044455	mitochondrial membrane part	82	28	11.32	0.42922
GO:0031201	SNARE complex	19	5	2.62	0.43319
GO:0034704	calcium channel complex	95	14	13.11	0.43351
GO:0046658	anchored component of plasma membrane	33	2	4.55	0.43636
GO:0071141	SMAD protein complex	17	2	2.35	0.44134
GO:0097362	MCM8-MCM9 complex	8	0	1.1	0.44279
GO:0005694	chromosome	1578	200	217.79	0.44322
GO:0005605	basal lamina	46	9	6.35	0.44407
GO:0031235	intrinsic component of the cytoplasmic side of the plasma membrane	6	1	0.83	0.44453
GO:0035068	micro-ribonucleoprotein complex	18	0	2.48	0.44767
GO:0005776	autophagic vacuole	14	0	1.93	0.44781
GO:0032982	myosin filament	124	4	17.11	0.45016
GO:0005856	cytoskeleton	4087	562	564.07	0.45137
GO:0097060	synaptic membrane	322	31	44.44	0.45338
GO:0034673	inhibin-betaglycan-ActRII complex	6	2	0.83	0.45424
GO:0005795	Golgi stack	84	5	11.59	0.45629
GO:0022627	cytosolic small ribosomal subunit	39	1	5.38	0.46155
GO:0016533	cyclin-dependent protein kinase 5 holoenzyme complex	12	0	1.66	0.46166
GO:0044452	nucleolar part	12	1	1.66	0.46252
GO:0045211	postsynaptic membrane	305	26	42.1	0.46274
GO:0030670	phagocytic vesicle membrane	20	4	2.76	0.46393
GO:0031372	UBC13-MMS2 complex	8	1	1.1	0.46577
GO:1990234	transferase complex	642	65	88.61	0.46624
GO:0016604	nuclear body	329	31	45.41	0.46712
GO:0000421	autophagic vacuole membrane	12	0	1.66	0.46893
GO:0005851	eukaryotic translation initiation factor 2B complex	20	3	2.76	0.47093
GO:0022626	cytosolic ribosome	78	2	10.77	0.47452
GO:0031673	H zone	15	1	2.07	0.47883
GO:0031513	nonmotile primary cilium	116	15	16.01	0.48041
GO:0010494	cytoplasmic stress granule	31	3	4.28	0.48347
GO:0005779	integral component of peroxisomal membrane	11	0	1.52	0.48499
GO:0031231	intrinsic component of peroxisomal membrane	11	0	1.52	0.48499
GO:0045495	pole plasm	122	12	16.84	0.48724
GO:0043256	laminin complex	41	8	5.66	0.48906
GO:0017119	Golgi transport complex	15	1	2.07	0.48949
GO:0043198	dendritic shaft	12	1	1.66	0.49498
GO:0005741	mitochondrial outer membrane	106	17	14.63	0.50392
GO:0005849	mRNA cleavage factor complex	28	3	3.86	0.50449
GO:0030669	clathrin-coated endocytic vesicle membrane	6	0	0.83	0.50523
GO:0030315	T-tubule	37	8	5.11	0.51248
GO:0032019	mitochondrial cloud	42	8	5.8	0.51372
GO:0005923	tight junction	123	21	16.98	0.51511
GO:0070160	occluding junction	123	21	16.98	0.51511
GO:0005680	anaphase-promoting complex	29	2	4	0.51672
GO:0034705	potassium channel complex	97	8	13.39	0.5168
GO:0008076	voltage-gated potassium channel complex	97	8	13.39	0.5168
GO:0005635	nuclear envelope	570	78	78.67	0.51797
GO:0005844	polysome	50	2	6.9	0.51817
GO:0005886	plasma membrane	5026	685	693.67	0.51873
GO:0033186	CAF-1 complex	9	2	1.24	0.51892
GO:0042765	GPI-anchor transamidase complex	10	2	1.38	0.52199
GO:0031984	organelle subcompartment	57	2	7.87	0.52477
GO:0031985	Golgi cisterna	57	2	7.87	0.52477
GO:0032580	Golgi cisterna membrane	57	2	7.87	0.52477
GO:0005769	early endosome	202	30	27.88	0.53219
GO:0032587	ruffle membrane	62	5	8.56	0.53248
GO:0044447	axoneme part	11	1	1.52	0.53446
GO:0097361	CIA complex	9	1	1.24	0.53534
GO:0005922	connexon complex	66	11	9.11	0.53933
GO:0042995	cell projection	2602	337	359.12	0.54738
GO:0016459	myosin complex	326	27	44.99	0.54764
GO:0042643	actomyosin, actin portion	16	2	2.21	0.54936
GO:0042383	sarcolemma	79	14	10.9	0.55075
GO:0048770	pigment granule	47	4	6.49	0.55095
GO:0042470	melanosome	47	4	6.49	0.55095
GO:0031256	leading edge membrane	102	8	14.08	0.55119
GO:0030964	NADH dehydrogenase complex	9	2	1.24	0.5515
GO:0005747	mitochondrial respiratory chain complex I	9	2	1.24	0.5515
GO:0045271	respiratory chain complex I	9	2	1.24	0.5515
GO:0071944	cell periphery	5922	802	817.33	0.55425
GO:0000152	nuclear ubiquitin ligase complex	50	4	6.9	0.55503
GO:0043235	receptor complex	191	24	26.36	0.55835
GO:0005720	nuclear heterochromatin	8	2	1.1	0.56419
GO:0030057	desmosome	24	2	3.31	0.56541
GO:0005669	transcription factor TFIID complex	18	0	2.48	0.56596
GO:0005912	adherens junction	303	38	41.82	0.56642
GO:0070161	anchoring junction	303	38	41.82	0.56642
GO:0016324	apical plasma membrane	136	21	18.77	0.5672
GO:0015934	large ribosomal subunit	61	5	8.42	0.57264
GO:0005882	intermediate filament	139	18	19.18	0.5753
GO:0005891	voltage-gated calcium channel complex	84	10	11.59	0.57863
GO:0005871	kinesin complex	41	2	5.66	0.58042
GO:0000178	exosome (RNase complex)	22	5	3.04	0.5813
GO:0098533	ATPase dependent transmembrane transport complex	21	1	2.9	0.58168
GO:0036038	TCTN-B9D complex	6	1	0.83	0.58637
GO:0031931	TORC1 complex	6	1	0.83	0.59448
GO:0038201	TOR complex	6	1	0.83	0.59448
GO:0031901	early endosome membrane	117	13	16.15	0.59623
GO:0000151	ubiquitin ligase complex	214	14	29.54	0.59649
GO:0046540	U4/U6 x U5 tri-snRNP complex	10	0	1.38	0.59827
GO:0097525	spliceosomal snRNP complex	10	0	1.38	0.59827
GO:0097526	spliceosomal tri-snRNP complex	10	0	1.38	0.59827
GO:0005847	mRNA cleavage and polyadenylation specificity factor complex	21	2	2.9	0.59868
GO:0030027	lamellipodium	231	37	31.88	0.59939
GO:1902554	serine/threonine protein kinase complex	23	0	3.17	0.60096
GO:0016460	myosin II complex	29	4	4	0.60222
GO:0033017	sarcoplasmic reticulum membrane	17	2	2.35	0.60599
GO:0045095	keratin filament	52	5	7.18	0.60834
GO:0005777	peroxisome	94	7	12.97	0.60835
GO:0042579	microbody	94	7	12.97	0.60835
GO:0035371	microtubule plus-end	7	2	0.97	0.61541
GO:0000940	condensed chromosome outer kinetochore	7	2	0.97	0.61663
GO:0005902	microvillus	214	21	29.54	0.62119
GO:0030877	beta-catenin destruction complex	16	1	2.21	0.62177
GO:0042405	nuclear inclusion body	9	0	1.24	0.62273
GO:0030127	COPII vesicle coat	16	4	2.21	0.62329
GO:0000307	cyclin-dependent protein kinase holoenzyme complex	22	2	3.04	0.62377
GO:0043073	germ cell nucleus	22	8	3.04	0.62831
GO:0043596	nuclear replication fork	19	4	2.62	0.62985
GO:0030684	preribosome	19	1	2.62	0.63821
GO:0030981	cortical microtubule cytoskeleton	13	3	1.79	0.63886
GO:0012510	trans-Golgi network transport vesicle membrane	15	3	2.07	0.64093
GO:0030130	clathrin coat of trans-Golgi network vesicle	15	3	2.07	0.64093
GO:0005675	holo TFIIH complex	6	0	0.83	0.64207
GO:0044456	synapse part	550	43	75.91	0.64221
GO:0030286	dynein complex	36	4	4.97	0.64238
GO:0032156	septin cytoskeleton	49	6	6.76	0.64827
GO:0031105	septin complex	49	6	6.76	0.64827
GO:0031465	Cul4B-RING E3 ubiquitin ligase complex	7	1	0.97	0.6496
GO:0005664	nuclear origin of replication recognition complex	9	2	1.24	0.65103
GO:0036379	myofilament	58	7	8	0.65351
GO:0005865	striated muscle thin filament	58	7	8	0.65351
GO:0048188	Set1C/COMPASS complex	6	0	0.83	0.65443
GO:0031091	platelet alpha granule	9	1	1.24	0.65663
GO:0000346	transcription export complex	6	1	0.83	0.667
GO:0005929	cilium	560	76	77.29	0.66782
GO:0012507	ER to Golgi transport vesicle membrane	25	5	3.45	0.67009
GO:0070688	MLL5-L complex	14	1	1.93	0.67206
GO:0032420	stereocilium	18	3	2.48	0.67247
GO:0070938	contractile ring	44	5	6.07	0.67473
GO:0030175	filopodium	238	32	32.85	0.67517
GO:0031253	cell projection membrane	227	24	31.33	0.67533
GO:0002178	palmitoyltransferase complex	12	0	1.66	0.67672
GO:0031211	endoplasmic reticulum palmitoyltransferase complex	12	0	1.66	0.67672
GO:0017059	serine C-palmitoyltransferase complex	12	0	1.66	0.67672
GO:0001931	uropod	20	2	2.76	0.67746
GO:0031254	cell trailing edge	20	2	2.76	0.67746
GO:0031258	lamellipodium membrane	10	0	1.38	0.68077
GO:0000785	chromatin	431	46	59.49	0.68523
GO:0045098	type III intermediate filament	9	2	1.24	0.68665
GO:0000109	nucleotide-excision repair complex	8	0	1.1	0.69737
GO:0030894	replisome	17	3	2.35	0.70192
GO:0000308	cytoplasmic cyclin-dependent protein kinase holoenzyme complex	13	2	1.79	0.70752
GO:0030285	integral component of synaptic vesicle membrane	13	0	1.79	0.70776
GO:0098563	intrinsic component of synaptic vesicle membrane	13	0	1.79	0.70776
GO:0030312	external encapsulating structure	14	1	1.93	0.71
GO:0043292	contractile fiber	405	39	55.9	0.71451
GO:0031234	extrinsic component of cytoplasmic side of plasma membrane	79	18	10.9	0.71579
GO:0044441	ciliary part	149	12	20.56	0.71681
GO:0044459	plasma membrane part	2299	316	317.3	0.71716
GO:0035749	myelin sheath adaxonal region	6	1	0.83	0.71993
GO:0043220	Schmidt-Lanterman incisure	6	1	0.83	0.71993
GO:0043218	compact myelin	6	1	0.83	0.71993
GO:0019897	extrinsic component of plasma membrane	109	22	15.04	0.72641
GO:0030016	myofibril	401	39	55.34	0.72734
GO:0044431	Golgi apparatus part	685	93	94.54	0.72943
GO:0016342	catenin complex	25	3	3.45	0.73166
GO:0030014	CCR4-NOT complex	24	1	3.31	0.73947
GO:0032421	stereocilium bundle	23	4	3.17	0.74041
GO:0030665	clathrin-coated vesicle membrane	35	5	4.83	0.74645
GO:0031982	vesicle	1469	197	202.75	0.74696
GO:0043228	non-membrane-bounded organelle	6203	808	856.12	0.75026
GO:0043232	intracellular non-membrane-bounded organelle	6203	808	856.12	0.75026
GO:0070876	SOSS complex	9	2	1.24	0.75042
GO:0036464	cytoplasmic ribonucleoprotein granule	152	18	20.98	0.75197
GO:0000932	cytoplasmic mRNA processing body	82	10	11.32	0.75222
GO:0030125	clathrin vesicle coat	18	3	2.48	0.75463
GO:0032589	neuron projection membrane	26	2	3.59	0.75465
GO:0032588	trans-Golgi network membrane	8	1	1.1	0.75688
GO:0005643	nuclear pore	63	2	8.7	0.75938
GO:1902911	protein kinase complex	44	2	6.07	0.76027
GO:0045203	integral component of cell outer membrane	6	0	0.83	0.7605
GO:0009279	cell outer membrane	6	0	0.83	0.7605
GO:0044462	external encapsulating structure part	6	0	0.83	0.7605
GO:0031230	intrinsic component of cell outer membrane	6	0	0.83	0.7605
GO:0030313	cell envelope	6	0	0.83	0.7605
GO:0043601	nuclear replisome	13	2	1.79	0.76291
GO:0031080	nuclear pore outer ring	10	0	1.38	0.76398
GO:0022625	cytosolic large ribosomal subunit	39	1	5.38	0.76404
GO:0030133	transport vesicle	81	11	11.18	0.77051
GO:0030658	transport vesicle membrane	51	9	7.04	0.77277
GO:0016602	CCAAT-binding factor complex	9	1	1.24	0.77492
GO:0005845	mRNA cap binding complex	34	1	4.69	0.77536
GO:0034518	RNA cap binding complex	34	1	4.69	0.77536
GO:0000792	heterochromatin	43	3	5.93	0.77625
GO:0072357	PTW/PP1 phosphatase complex	17	2	2.35	0.77985
GO:0043209	myelin sheath	16	2	2.21	0.78092
GO:0030425	dendrite	290	31	40.02	0.78597
GO:0009897	external side of plasma membrane	64	6	8.83	0.79871
GO:0044297	cell body	139	13	19.18	0.79945
GO:0035145	exon-exon junction complex	9	1	1.24	0.80104
GO:0043025	neuronal cell body	138	12	19.05	0.8014
GO:0032777	Piccolo NuA4 histone acetyltransferase complex	11	2	1.52	0.80168
GO:0070724	BMP receptor complex	9	1	1.24	0.80364
GO:0016581	NuRD complex	9	1	1.24	0.80521
GO:0090545	CHD-type complex	9	1	1.24	0.80521
GO:0030662	coated vesicle membrane	78	12	10.77	0.80609
GO:0044665	MLL1/2 complex	38	4	5.24	0.81081
GO:0071339	MLL1 complex	38	4	5.24	0.81081
GO:0000808	origin recognition complex	14	2	1.93	0.81181
GO:0030426	growth cone	110	12	15.18	0.81204
GO:0005911	cell-cell junction	495	71	68.32	0.81246
GO:0005798	Golgi-associated vesicle	56	5	7.73	0.81318
GO:0034702	ion channel complex	384	35	53	0.81331
GO:0030140	trans-Golgi network transport vesicle	20	3	2.76	0.81384
GO:0043679	axon terminus	22	2	3.04	0.81461
GO:0032444	activin responsive factor complex	6	0	0.83	0.81499
GO:0031306	intrinsic component of mitochondrial outer membrane	19	2	2.62	0.81655
GO:0031307	integral component of mitochondrial outer membrane	19	2	2.62	0.81655
GO:0045111	intermediate filament cytoskeleton	151	19	20.84	0.81688
GO:0031974	membrane-enclosed lumen	2131	269	294.11	0.81704
GO:0016323	basolateral plasma membrane	122	14	16.84	0.81853
GO:0044464	cell part	24412	3396	3369.26	0.82172
GO:0005623	cell	24412	3396	3369.26	0.82172
GO:0042583	chromaffin granule	7	0	0.97	0.8223
GO:0042584	chromaffin granule membrane	7	0	0.97	0.8223
GO:0060293	germ plasm	56	5	7.73	0.82364
GO:0016328	lateral plasma membrane	95	12	13.11	0.82417
GO:0030424	axon	287	25	39.61	0.82446
GO:0000139	Golgi membrane	494	64	68.18	0.82475
GO:0031226	intrinsic component of plasma membrane	963	116	132.91	0.8259
GO:0005826	actomyosin contractile ring	40	4	5.52	0.8274
GO:0005858	axonemal dynein complex	7	1	0.97	0.82782
GO:1903293	phosphatase complex	71	6	9.8	0.82884
GO:0008287	protein serine/threonine phosphatase complex	71	6	9.8	0.82884
GO:0035861	site of double-strand break	18	2	2.48	0.82925
GO:0070545	PeBoW complex	7	0	0.97	0.82934
GO:0031519	PcG protein complex	84	10	11.59	0.82941
GO:0043233	organelle lumen	2117	267	292.18	0.83071
GO:0098552	side of membrane	93	9	12.84	0.83249
GO:0005905	coated pit	145	16	20.01	0.83621
GO:0070013	intracellular organelle lumen	2110	266	291.21	0.83743
GO:0044306	neuron projection terminus	24	2	3.31	0.83796
GO:0005667	transcription factor complex	559	66	77.15	0.8413
GO:0031410	cytoplasmic vesicle	1346	177	185.77	0.84225
GO:0043186	P granule	54	5	7.45	0.84396
GO:0030017	sarcomere	227	30	31.33	0.84456
GO:0035102	PRC1 complex	18	2	2.48	0.8448
GO:0002102	podosome	19	2	2.62	0.84593
GO:0005887	integral component of plasma membrane	905	112	124.9	0.84617
GO:1902493	acetyltransferase complex	116	9	16.01	0.84916
GO:0000123	histone acetyltransferase complex	116	9	16.01	0.84916
GO:0031248	protein acetyltransferase complex	116	9	16.01	0.84916
GO:0030120	vesicle coat	49	7	6.76	0.8521
GO:0005787	signal peptidase complex	6	1	0.83	0.85525
GO:0055087	Ski complex	6	0	0.83	0.85548
GO:0005903	brush border	11	1	1.52	0.85809
GO:0012505	endomembrane system	3637	595	501.97	0.85848
GO:0016607	nuclear speck	193	17	26.64	0.85868
GO:0016010	dystrophin-associated glycoprotein complex	23	3	3.17	0.85883
GO:0045009	chitosome	12	0	1.66	0.85898
GO:0033162	melanosome membrane	12	0	1.66	0.85898
GO:0031300	intrinsic component of organelle membrane	231	24	31.88	0.85972
GO:0070531	BRCA1-A complex	9	1	1.24	0.86035
GO:0005681	spliceosomal complex	151	23	20.84	0.86042
GO:0035301	Hedgehog signaling complex	38	6	5.24	0.86165
GO:0036477	somatodendritic compartment	368	35	50.79	0.86404
GO:0030427	site of polarized growth	114	14	15.73	0.8666
GO:1990111	spermatoproteasome complex	14	1	1.93	0.86876
GO:0030660	Golgi-associated vesicle membrane	42	5	5.8	0.86942
GO:0035770	ribonucleoprotein granule	181	21	24.98	0.87086
GO:0060388	vitelline envelope	8	1	1.1	0.87147
GO:0035805	egg coat	8	1	1.1	0.87147
GO:0031301	integral component of organelle membrane	224	23	30.92	0.87316
GO:0044425	membrane part	9313	1319	1285.35	0.87865
GO:0030686	90S preribosome	11	0	1.52	0.87875
GO:0042641	actomyosin	69	10	9.52	0.88251
GO:0031941	filamentous actin	138	14	19.05	0.88255
GO:0031988	membrane-bounded vesicle	1248	164	172.24	0.88721
GO:0005892	acetylcholine-gated channel complex	32	2	4.42	0.88865
GO:0019005	SCF ubiquitin ligase complex	29	4	4	0.88955
GO:0090568	nuclear transcriptional repressor complex	10	1	1.38	0.88989
GO:0044451	nucleoplasm part	855	88	118	0.89028
GO:0098573	intrinsic component of mitochondrial membrane	29	3	4	0.89196
GO:0032592	integral component of mitochondrial membrane	29	3	4	0.89196
GO:0005796	Golgi lumen	13	0	1.79	0.89388
GO:0044463	cell projection part	613	66	84.6	0.89747
GO:0032806	carboxy-terminal domain protein kinase complex	8	0	1.1	0.89803
GO:0016020	membrane	14683	2063	2026.5	0.89818
GO:0035339	SPOTS complex	6	0	0.83	0.90353
GO:0042645	mitochondrial nucleoid	24	2	3.31	0.90825
GO:0030667	secretory granule membrane	13	2	1.79	0.91051
GO:1902495	transmembrane transporter complex	407	38	56.17	0.91322
GO:1990351	transporter complex	407	38	56.17	0.91322
GO:0098590	plasma membrane region	275	33	37.95	0.9146
GO:0098553	lumenal side of endoplasmic reticulum membrane	6	0	0.83	0.91718
GO:0098554	cytoplasmic side of endoplasmic reticulum membrane	6	0	0.83	0.91718
GO:0098576	lumenal side of membrane	6	0	0.83	0.91718
GO:0071458	integral component of cytoplasmic side of endoplasmic reticulum membrane	6	0	0.83	0.91718
GO:0071556	integral component of lumenal side of endoplasmic reticulum membrane	6	0	0.83	0.91718
GO:0000159	protein phosphatase type 2A complex	50	4	6.9	0.92008
GO:0034707	chloride channel complex	69	4	9.52	0.92015
GO:0031461	cullin-RING ubiquitin ligase complex	134	6	18.49	0.92062
GO:0000775	chromosome, centromeric region	358	42	49.41	0.92066
GO:0045160	myosin I complex	7	0	0.97	0.92239
GO:0060171	stereocilium membrane	7	0	0.97	0.92239
GO:0016461	unconventional myosin complex	7	0	0.97	0.92239
GO:0044449	contractile fiber part	241	30	33.26	0.926
GO:0001726	ruffle	307	35	42.37	0.92671
GO:0042575	DNA polymerase complex	12	1	1.66	0.92797
GO:0045177	apical part of cell	188	24	25.95	0.92919
GO:0030054	cell junction	1409	172	194.47	0.93308
GO:0035327	transcriptionally active chromatin	10	0	1.38	0.93349
GO:0001750	photoreceptor outer segment	44	3	6.07	0.93375
GO:0031224	intrinsic component of membrane	7350	961	1014.42	0.93395
GO:0030659	cytoplasmic vesicle membrane	291	35	40.16	0.93512
GO:0016023	cytoplasmic membrane-bounded vesicle	1152	148	158.99	0.93659
GO:0012506	vesicle membrane	322	36	44.44	0.93682
GO:0001725	stress fiber	67	9	9.25	0.94015
GO:0005930	axoneme	18	1	2.48	0.9434
GO:0032838	cell projection cytoplasm	18	1	2.48	0.9434
GO:0097014	ciliary cytoplasm	18	1	2.48	0.9434
GO:0097458	neuron part	945	111	130.43	0.94722
GO:0043190	ATP-binding cassette (ABC) transporter complex	7	0	0.97	0.94823
GO:0033267	axon part	43	3	5.93	0.95222
GO:0016021	integral component of membrane	7143	933	985.85	0.95232
GO:0005884	actin filament	272	25	37.54	0.95758
GO:0031674	I band	143	17	19.74	0.96029
GO:0045202	synapse	952	98	131.39	0.96138
GO:0032432	actin filament bundle	73	9	10.08	0.96215
GO:0008278	cohesin complex	13	1	1.79	0.96259
GO:0030893	meiotic cohesin complex	13	1	1.79	0.96259
GO:0008021	synaptic vesicle	150	8	20.7	0.96369
GO:0005881	cytoplasmic microtubule	59	7	8.14	0.96427
GO:0044815	DNA packaging complex	200	17	27.6	0.96521
GO:0031251	PAN complex	7	0	0.97	0.96539
GO:0030018	Z disc	96	11	13.25	0.96549
GO:0045334	clathrin-coated endocytic vesicle	24	1	3.31	0.96583
GO:0031252	cell leading edge	595	74	82.12	0.96642
GO:0044309	neuron spine	72	8	9.94	0.96891
GO:0043197	dendritic spine	72	8	9.94	0.96891
GO:0030135	coated vesicle	292	31	40.3	0.97164
GO:0031228	intrinsic component of Golgi membrane	65	8	8.97	0.97319
GO:0030173	integral component of Golgi membrane	65	8	8.97	0.97319
GO:0043005	neuron projection	748	90	103.24	0.97357
GO:0014069	postsynaptic density	84	12	11.59	0.97644
GO:0030136	clathrin-coated vesicle	242	24	33.4	0.97648
GO:0009295	nucleoid	32	4	4.42	0.97711
GO:0032433	filopodium tip	6	0	0.83	0.97914
GO:0044433	cytoplasmic vesicle part	359	39	49.55	0.98577
GO:0031981	nuclear lumen	1882	218	259.75	0.98763
GO:0044428	nuclear part	3069	379	423.57	0.99193
GO:0032993	protein-DNA complex	562	64	77.57	0.99446
GO:0000793	condensed chromosome	221	23	30.5	0.99459
GO:0005954	calcium- and calmodulin-dependent protein kinase complex	20	2	2.76	0.99473
GO:0005654	nucleoplasm	1253	128	172.93	0.99485
GO:0060170	ciliary membrane	58	2	8	0.99503
GO:0044304	main axon	14	0	1.93	0.99545
GO:1990104	DNA bending complex	191	16	26.36	0.99612
GO:0000786	nucleosome	191	16	26.36	0.99612
GO:0044446	intracellular organelle part	8722	1206	1203.78	0.99696
GO:0080008	Cul4-RING E3 ubiquitin ligase complex	25	1	3.45	0.99729
GO:0035267	NuA4 histone acetyltransferase complex	77	5	10.63	0.99806
GO:0042622	photoreceptor outer segment membrane	15	0	2.07	0.99866
GO:0030672	synaptic vesicle membrane	73	4	10.08	0.99895
GO:0000777	condensed chromosome kinetochore	102	10	14.08	0.99898
GO:0000779	condensed chromosome, centromeric region	102	10	14.08	0.99898
GO:0005869	dynactin complex	10	0	1.38	0.99907
GO:0043189	H4/H2A histone acetyltransferase complex	79	5	10.9	0.99923
GO:1902562	H4 histone acetyltransferase complex	79	5	10.9	0.99923
GO:0030990	intraciliary transport particle	7	0	0.97	0.99965
GO:0030991	intraciliary transport particle A	7	0	0.97	0.99965
GO:0044422	organelle part	9015	1245	1244.22	0.9997
GO:0016592	mediator complex	55	1	7.59	0.99989
GO:0005575	cellular_component	29069	4012	4012	1

## Sheet: GO terms for MF
GO.ID	Term	Annotated	Significant	Expected	KS
GO:0004298	threonine-type endopeptidase activity	40	30	5.42	7.1e-15
GO:0004129	cytochrome-c oxidase activity	25	17	3.38	6.4e-09
GO:0008553	hydrogen-exporting ATPase activity, phosphorylative mechanism	12	10	1.62	2.5e-07
GO:0046961	proton-transporting ATPase activity, rotational mechanism	33	16	4.47	2.8e-06
GO:0003924	GTPase activity	488	85	66.07	6.7e-06
GO:0016712	oxidoreductase activity, acting on paired donors, with incorporation or reduction of molecular oxygen, reduced flavin or flavoprotein as one donor, and incorporation of one atom of oxygen	41	20	5.55	1.4e-05
GO:0005525	GTP binding	893	147	120.9	3.7e-05
GO:0019904	protein domain specific binding	615	111	83.26	5.4e-05
GO:0004332	fructose-bisphosphate aldolase activity	10	8	1.35	0.00012
GO:0019789	SUMO transferase activity	38	11	5.14	0.00023
GO:0005381	iron ion transmembrane transporter activity	15	9	2.03	0.00045
GO:0005515	protein binding	11547	1563	1563.28	0.00068
GO:0004364	glutathione transferase activity	16	3	2.17	0.0007
GO:0016877	ligase activity, forming carbon-sulfur bonds	26	10	3.52	0.00079
GO:0016936	galactoside binding	14	2	1.9	0.0008
GO:0016620	oxidoreductase activity, acting on the aldehyde or oxo group of donors, NAD or NADP as acceptor	37	9	5.01	0.00088
GO:0017134	fibroblast growth factor binding	45	17	6.09	0.00093
GO:0008526	phosphatidylinositol transporter activity	12	3	1.62	0.00099
GO:0003989	acetyl-CoA carboxylase activity	11	6	1.49	0.00104
GO:0003735	structural constituent of ribosome	203	24	27.48	0.00105
GO:0005545	1-phosphatidylinositol binding	23	6	3.11	0.00108
GO:0005125	cytokine activity	78	20	10.56	0.00111
GO:0008449	N-acetylglucosamine-6-sulfatase activity	17	8	2.3	0.00122
GO:0004714	transmembrane receptor protein tyrosine kinase activity	387	86	52.39	0.00185
GO:0008137	NADH dehydrogenase (ubiquinone) activity	27	10	3.66	0.00219
GO:0004999	vasoactive intestinal polypeptide receptor activity	11	2	1.49	0.00233
GO:0019200	carbohydrate kinase activity	51	16	6.9	0.00235
GO:0004430	1-phosphatidylinositol 4-kinase activity	21	4	2.84	0.0025
GO:0004329	formate-tetrahydrofolate ligase activity	9	6	1.22	0.00293
GO:0004488	methylenetetrahydrofolate dehydrogenase (NADP+) activity	9	6	1.22	0.00293
GO:0005328	neurotransmitter:sodium symporter activity	61	19	8.26	0.00308
GO:0016801	hydrolase activity, acting on ether bonds	17	4	2.3	0.00397
GO:0004065	arylsulfatase activity	8	4	1.08	0.00434
GO:0004553	hydrolase activity, hydrolyzing O-glycosyl compounds	153	24	20.71	0.00438
GO:0004579	dolichyl-diphosphooligosaccharide-protein glycotransferase activity	10	6	1.35	0.00459
GO:0008201	heparin binding	114	28	15.43	0.00464
GO:0004143	diacylglycerol kinase activity	25	4	3.38	0.00518
GO:0010485	H4 histone acetyltransferase activity	13	2	1.76	0.00543
GO:0016702	oxidoreductase activity, acting on single donors with incorporation of molecular oxygen, incorporation of two atoms of oxygen	103	25	13.94	0.00543
GO:0060072	large conductance calcium-activated potassium channel activity	9	1	1.22	0.00551
GO:0032183	SUMO binding	14	5	1.9	0.00573
GO:0019902	phosphatase binding	147	22	19.9	0.0059
GO:0003746	translation elongation factor activity	61	9	8.26	0.00598
GO:0004075	biotin carboxylase activity	17	7	2.3	0.00605
GO:0008865	fructokinase activity	8	5	1.08	0.00631
GO:0019158	mannokinase activity	8	5	1.08	0.00631
GO:0004812	aminoacyl-tRNA ligase activity	84	27	11.37	0.00698
GO:0004826	phenylalanine-tRNA ligase activity	8	5	1.08	0.00722
GO:0000400	four-way junction DNA binding	6	0	0.81	0.00802
GO:0032137	guanine/thymine mispair binding	6	0	0.81	0.00802
GO:0032138	single base insertion or deletion binding	6	0	0.81	0.00802
GO:0004459	L-lactate dehydrogenase activity	6	2	0.81	0.00838
GO:0043394	proteoglycan binding	31	7	4.2	0.0084
GO:0020037	heme binding	220	50	29.78	0.00842
GO:0009055	electron carrier activity	195	57	26.4	0.00844
GO:0016907	G-protein coupled acetylcholine receptor activity	10	0	1.35	0.00858
GO:0005506	iron ion binding	280	61	37.91	0.00891
GO:0016859	cis-trans isomerase activity	53	10	7.18	0.00895
GO:0015288	porin activity	14	2	1.9	0.00896
GO:0004982	N-formyl peptide receptor activity	9	3	1.22	0.00938
GO:0016831	carboxy-lyase activity	50	9	6.77	0.00985
GO:0008443	phosphofructokinase activity	37	9	5.01	0.01051
GO:0004308	exo-alpha-sialidase activity	15	4	2.03	0.01075
GO:0016997	alpha-sialidase activity	15	4	2.03	0.01075
GO:0004370	glycerol kinase activity	6	2	0.81	0.01094
GO:0051082	unfolded protein binding	116	31	15.7	0.01119
GO:0016878	acid-thiol ligase activity	21	6	2.84	0.01133
GO:0003917	DNA topoisomerase type I activity	6	2	0.81	0.01186
GO:0035251	UDP-glucosyltransferase activity	16	4	2.17	0.01195
GO:0019201	nucleotide kinase activity	15	6	2.03	0.012
GO:0004340	glucokinase activity	9	5	1.22	0.01254
GO:0035586	purinergic receptor activity	63	14	8.53	0.01259
GO:0015078	hydrogen ion transmembrane transporter activity	153	61	20.71	0.01273
GO:0046923	ER retention sequence binding	8	1	1.08	0.01321
GO:0051059	NF-kappaB binding	29	9	3.93	0.01372
GO:0005102	receptor binding	1379	186	186.69	0.01412
GO:0019903	protein phosphatase binding	96	17	13	0.01422
GO:0050681	androgen receptor binding	55	4	7.45	0.01441
GO:0004222	metalloendopeptidase activity	172	30	23.29	0.01567
GO:0030971	receptor tyrosine kinase binding	8	1	1.08	0.01614
GO:0016835	carbon-oxygen lyase activity	68	13	9.21	0.01681
GO:0004775	succinate-CoA ligase (ADP-forming) activity	8	3	1.08	0.01687
GO:0042813	Wnt-activated receptor activity	45	12	6.09	0.01711
GO:0001972	retinoic acid binding	32	9	4.33	0.01713
GO:0003707	steroid hormone receptor activity	186	38	25.18	0.0179
GO:0003872	6-phosphofructokinase activity	16	4	2.17	0.01793
GO:2001065	mannan binding	6	3	0.81	0.01809
GO:0005007	fibroblast growth factor-activated receptor activity	19	8	2.57	0.01823
GO:0016863	intramolecular oxidoreductase activity, transposing C=C bonds	9	3	1.22	0.01857
GO:0005527	macrolide binding	18	4	2.44	0.01879
GO:0005528	FK506 binding	18	4	2.44	0.01879
GO:0004886	9-cis retinoic acid receptor activity	49	16	6.63	0.01894
GO:1901505	carbohydrate derivative transporter activity	62	9	8.39	0.01897
GO:0005537	mannose binding	10	5	1.35	0.01908
GO:0005310	dicarboxylic acid transmembrane transporter activity	28	1	3.79	0.0192
GO:0016803	ether hydrolase activity	9	4	1.22	0.01932
GO:0008568	microtubule-severing ATPase activity	7	1	0.95	0.01933
GO:0004477	methenyltetrahydrofolate cyclohydrolase activity	6	4	0.81	0.0202
GO:0019798	procollagen-proline dioxygenase activity	15	6	2.03	0.02088
GO:0042162	telomeric DNA binding	7	1	0.95	0.02092
GO:0042379	chemokine receptor binding	24	8	3.25	0.02112
GO:0008009	chemokine activity	24	8	3.25	0.02112
GO:0016769	transferase activity, transferring nitrogenous groups	38	13	5.14	0.02263
GO:0043995	histone acetyltransferase activity (H4-K5 specific)	6	1	0.81	0.0234
GO:0043996	histone acetyltransferase activity (H4-K8 specific)	6	1	0.81	0.0234
GO:0046972	histone acetyltransferase activity (H4-K16 specific)	6	1	0.81	0.0234
GO:0004576	oligosaccharyl transferase activity	16	7	2.17	0.02354
GO:0032947	protein complex scaffold	28	10	3.79	0.02361
GO:0030395	lactose binding	11	3	1.49	0.02386
GO:0048030	disaccharide binding	11	3	1.49	0.02386
GO:0043395	heparan sulfate proteoglycan binding	28	5	3.79	0.02402
GO:0005487	nucleocytoplasmic transporter activity	7	0	0.95	0.02481
GO:0017147	Wnt-protein binding	97	18	13.13	0.02507
GO:0019238	cyclohydrolase activity	8	4	1.08	0.02581
GO:0016247	channel regulator activity	43	1	5.82	0.0264
GO:0004656	procollagen-proline 4-dioxygenase activity	10	4	1.35	0.02663
GO:0001664	G-protein coupled receptor binding	169	26	22.88	0.02687
GO:0004634	phosphopyruvate hydratase activity	9	0	1.22	0.02737
GO:0005179	hormone activity	98	4	13.27	0.02741
GO:0003910	DNA ligase (ATP) activity	7	0	0.95	0.02755
GO:0003909	DNA ligase activity	7	0	0.95	0.02755
GO:0015145	monosaccharide transmembrane transporter activity	21	6	2.84	0.02796
GO:0015149	hexose transmembrane transporter activity	21	6	2.84	0.02796
GO:0035184	histone threonine kinase activity	50	4	6.77	0.02806
GO:0004616	phosphogluconate dehydrogenase (decarboxylating) activity	6	1	0.81	0.02833
GO:0016853	isomerase activity	222	44	30.06	0.02997
GO:0004716	receptor signaling protein tyrosine kinase activity	21	8	2.84	0.03117
GO:0051119	sugar transmembrane transporter activity	30	7	4.06	0.03204
GO:0005010	insulin-like growth factor-activated receptor activity	57	17	7.72	0.03222
GO:0004359	glutaminase activity	8	2	1.08	0.03261
GO:0005003	ephrin receptor activity	138	24	18.68	0.03323
GO:0032090	Pyrin domain binding	10	4	1.35	0.03343
GO:0031543	peptidyl-proline dioxygenase activity	16	6	2.17	0.0335
GO:0016860	intramolecular oxidoreductase activity	70	16	9.48	0.03387
GO:0004774	succinate-CoA ligase activity	11	4	1.49	0.03433
GO:0016725	oxidoreductase activity, acting on CH or CH2 groups	11	5	1.49	0.03497
GO:0048406	nerve growth factor binding	11	2	1.49	0.03511
GO:0051428	peptide hormone receptor binding	6	0	0.81	0.03566
GO:0031683	G-protein beta/gamma-subunit complex binding	49	11	6.63	0.03618
GO:0035403	histone kinase activity (H3-T6 specific)	48	4	6.5	0.03651
GO:0019003	GDP binding	127	22	17.19	0.03673
GO:0046527	glucosyltransferase activity	18	4	2.44	0.03711
GO:0016791	phosphatase activity	630	93	85.29	0.0383
GO:0016502	nucleotide receptor activity	53	10	7.18	0.03905
GO:0001614	purinergic nucleotide receptor activity	53	10	7.18	0.03905
GO:0031821	G-protein coupled serotonin receptor binding	27	9	3.66	0.0391
GO:0004715	non-membrane spanning protein tyrosine kinase activity	88	18	11.91	0.03922
GO:0030234	enzyme regulator activity	1104	182	149.46	0.03957
GO:0008241	peptidyl-dipeptidase activity	6	2	0.81	0.03959
GO:0043121	neurotrophin binding	38	9	5.14	0.03972
GO:0003993	acid phosphatase activity	18	6	2.44	0.03977
GO:0008289	lipid binding	1241	186	168.01	0.03987
GO:0005085	guanyl-nucleotide exchange factor activity	374	55	50.63	0.04047
GO:0004857	enzyme inhibitor activity	325	63	44	0.04097
GO:0008483	transaminase activity	33	11	4.47	0.04127
GO:0008476	protein-tyrosine sulfotransferase activity	6	1	0.81	0.04144
GO:0002162	dystroglycan binding	16	1	2.17	0.04324
GO:0000049	tRNA binding	31	7	4.2	0.04351
GO:0005355	glucose transmembrane transporter activity	19	4	2.57	0.04389
GO:0005520	insulin-like growth factor binding	115	26	15.57	0.04467
GO:0016886	ligase activity, forming phosphoric ester bonds	10	0	1.35	0.04713
GO:0010465	nerve growth factor receptor activity	10	2	1.35	0.04761
GO:0060175	brain-derived neurotrophic factor-activated receptor activity	10	2	1.35	0.04761
GO:0048403	brain-derived neurotrophic factor binding	10	2	1.35	0.04761
GO:0003714	transcription corepressor activity	137	14	18.55	0.04792
GO:0031545	peptidyl-proline 4-dioxygenase activity	11	4	1.49	0.04823
GO:0017017	MAP kinase tyrosine/serine/threonine phosphatase activity	30	10	4.06	0.04863
GO:0019899	enzyme binding	1403	209	189.94	0.04941
GO:0015932	nucleobase-containing compound transmembrane transporter activity	56	8	7.58	0.04945
GO:0004859	phospholipase inhibitor activity	9	4	1.22	0.04989
GO:0055102	lipase inhibitor activity	9	4	1.22	0.04989
GO:0001637	G-protein coupled chemoattractant receptor activity	104	25	14.08	0.05005
GO:0004950	chemokine receptor activity	104	25	14.08	0.05005
GO:0016405	CoA-ligase activity	14	4	1.9	0.05049
GO:0016645	oxidoreductase activity, acting on the CH-NH group of donors	31	11	4.2	0.05259
GO:0071855	neuropeptide receptor binding	11	2	1.49	0.05329
GO:0000149	SNARE binding	36	2	4.87	0.0533
GO:0016614	oxidoreductase activity, acting on CH-OH group of donors	167	35	22.61	0.05455
GO:0034647	histone demethylase activity (H3-trimethyl-K4 specific)	10	0	1.35	0.05457
GO:0034648	histone demethylase activity (H3-dimethyl-K4 specific)	10	0	1.35	0.05457
GO:0005200	structural constituent of cytoskeleton	105	12	14.22	0.05468
GO:0005030	neurotrophin receptor activity	40	9	5.42	0.05529
GO:0005044	scavenger receptor activity	39	12	5.28	0.05563
GO:0017040	ceramidase activity	10	2	1.35	0.05588
GO:0001106	RNA polymerase II transcription corepressor activity	26	3	3.52	0.05623
GO:0001227	RNA polymerase II transcription regulatory region sequence-specific DNA binding transcription factor activity involved in negative regulation of transcription	23	4	3.11	0.05643
GO:0001078	RNA polymerase II core promoter proximal region sequence-specific DNA binding transcription factor activity involved in negative regulation of transcription	23	4	3.11	0.05643
GO:0019840	isoprenoid binding	39	9	5.28	0.05693
GO:0005501	retinoid binding	39	9	5.28	0.05693
GO:0004896	cytokine receptor activity	141	32	19.09	0.05738
GO:0031435	mitogen-activated protein kinase kinase kinase binding	50	10	6.77	0.05815
GO:0008174	mRNA methyltransferase activity	8	1	1.08	0.05852
GO:0033549	MAP kinase phosphatase activity	31	10	4.2	0.05889
GO:0001608	G-protein coupled nucleotide receptor activity	43	9	5.82	0.05889
GO:0045028	G-protein coupled purinergic nucleotide receptor activity	43	9	5.82	0.05889
GO:0002153	steroid receptor RNA activator RNA binding	8	3	1.08	0.05969
GO:0016811	hydrolase activity, acting on carbon-nitrogen (but not peptide) bonds, in linear amides	88	16	11.91	0.06002
GO:0031420	alkali metal ion binding	19	7	2.57	0.06003
GO:0030165	PDZ domain binding	113	26	15.3	0.06056
GO:0008430	selenium binding	23	7	3.11	0.06056
GO:0000030	mannosyltransferase activity	7	2	0.95	0.06087
GO:0003684	damaged DNA binding	43	4	5.82	0.06096
GO:0001034	sequence-specific DNA binding RNA polymerase III transcription factor activity	47	14	6.36	0.06098
GO:0030170	pyridoxal phosphate binding	86	19	11.64	0.06103
GO:0015035	protein disulfide oxidoreductase activity	55	11	7.45	0.06178
GO:0004331	fructose-2,6-bisphosphate 2-phosphatase activity	23	6	3.11	0.06186
GO:0000979	RNA polymerase II core promoter sequence-specific DNA binding	40	7	5.42	0.06317
GO:0016763	transferase activity, transferring pentosyl groups	69	12	9.34	0.06324
GO:0019239	deaminase activity	40	5	5.42	0.06326
GO:0016868	intramolecular transferase activity, phosphotransferases	21	8	2.84	0.06354
GO:0016646	oxidoreductase activity, acting on the CH-NH group of donors, NAD or NADP as acceptor	23	10	3.11	0.06363
GO:0043236	laminin binding	17	1	2.3	0.06446
GO:0004800	thyroxine 5'-deiodinase activity	10	5	1.35	0.06536
GO:0004602	glutathione peroxidase activity	8	2	1.08	0.06638
GO:0003878	ATP citrate synthase activity	6	2	0.81	0.06713
GO:0003906	DNA-(apurinic or apyrimidinic site) lyase activity	7	1	0.95	0.0672
GO:0004713	protein tyrosine kinase activity	645	124	87.32	0.06816
GO:0000977	RNA polymerase II regulatory region sequence-specific DNA binding	96	13	13	0.06845
GO:0001012	RNA polymerase II regulatory region DNA binding	96	13	13	0.06845
GO:0005126	cytokine receptor binding	134	23	18.14	0.06891
GO:0004707	MAP kinase activity	56	7	7.58	0.06965
GO:0003834	beta-carotene 15,15'-monooxygenase activity	13	2	1.76	0.06976
GO:0005057	receptor signaling protein activity	302	51	40.89	0.07079
GO:0016746	transferase activity, transferring acyl groups	313	55	42.38	0.07102
GO:0042826	histone deacetylase binding	37	5	5.01	0.07136
GO:0004383	guanylate cyclase activity	27	3	3.66	0.07219
GO:0035258	steroid hormone receptor binding	72	4	9.75	0.0726
GO:0051861	glycolipid binding	24	8	3.25	0.07261
GO:0016494	C-X-C chemokine receptor activity	19	6	2.57	0.07262
GO:0060589	nucleoside-triphosphatase regulator activity	521	87	70.54	0.07293
GO:0004743	pyruvate kinase activity	8	4	1.08	0.07379
GO:0030955	potassium ion binding	8	4	1.08	0.07379
GO:0003755	peptidyl-prolyl cis-trans isomerase activity	39	8	5.28	0.07479
GO:0042169	SH2 domain binding	89	19	12.05	0.07503
GO:0030957	Tat protein binding	12	3	1.62	0.07517
GO:0015036	disulfide oxidoreductase activity	56	11	7.58	0.07617
GO:1901476	carbohydrate transporter activity	45	8	6.09	0.07627
GO:0015144	carbohydrate transmembrane transporter activity	45	8	6.09	0.07627
GO:0035173	histone kinase activity	102	12	13.81	0.07666
GO:0003796	lysozyme activity	7	1	0.95	0.07747
GO:0016706	oxidoreductase activity, acting on paired donors, with incorporation or reduction of molecular oxygen, 2-oxoglutarate as one donor, and incorporation of one atom each of oxygen into both donors	88	16	11.91	0.07766
GO:0003730	mRNA 3'-UTR binding	99	12	13.4	0.07817
GO:0016408	C-acyltransferase activity	12	0	1.62	0.07873
GO:0031997	N-terminal myristoylation domain binding	7	3	0.95	0.07986
GO:0004601	peroxidase activity	32	9	4.33	0.08033
GO:0016684	oxidoreductase activity, acting on peroxide as acceptor	32	9	4.33	0.08033
GO:0003756	protein disulfide isomerase activity	23	4	3.11	0.08113
GO:0016864	intramolecular oxidoreductase activity, transposing S-S bonds	23	4	3.11	0.08113
GO:0005337	nucleoside transmembrane transporter activity	47	7	6.36	0.08118
GO:0008536	Ran GTPase binding	55	6	7.45	0.08145
GO:0004017	adenylate kinase activity	7	2	0.95	0.08264
GO:0070567	cytidylyltransferase activity	10	1	1.35	0.08292
GO:0008252	nucleotidase activity	15	2	2.03	0.08352
GO:0008253	5'-nucleotidase activity	15	2	2.03	0.08352
GO:0016491	oxidoreductase activity	1249	253	169.09	0.08567
GO:0050661	NADP binding	36	11	4.87	0.08659
GO:0017025	TBP-class protein binding	21	7	2.84	0.08691
GO:0004559	alpha-mannosidase activity	33	4	4.47	0.08726
GO:0046912	transferase activity, transferring acyl groups, acyl groups converted into alkyl on transfer	10	3	1.35	0.08848
GO:0031072	heat shock protein binding	31	8	4.2	0.08874
GO:0016836	hydro-lyase activity	60	11	8.12	0.08926
GO:0048037	cofactor binding	356	62	48.2	0.09048
GO:0019205	nucleobase-containing compound kinase activity	53	9	7.18	0.09066
GO:0070566	adenylyltransferase activity	27	2	3.66	0.09079
GO:0001047	core promoter binding	49	8	6.63	0.09082
GO:0070330	aromatase activity	20	7	2.71	0.092
GO:0050840	extracellular matrix binding	37	3	5.01	0.09302
GO:0055056	D-glucose transmembrane transporter activity	9	2	1.22	0.09305
GO:0016427	tRNA (cytosine) methyltransferase activity	8	0	1.08	0.09377
GO:0003729	mRNA binding	252	23	34.12	0.0939
GO:0044822	poly(A) RNA binding	252	23	34.12	0.0939
GO:0098531	direct ligand regulated sequence-specific DNA binding transcription factor activity	162	34	21.93	0.09423
GO:0004879	ligand-activated sequence-specific DNA binding RNA polymerase II transcription factor activity	162	34	21.93	0.09423
GO:0042731	PH domain binding	34	4	4.6	0.09573
GO:0046966	thyroid hormone receptor binding	87	21	11.78	0.09604
GO:0015211	purine nucleoside transmembrane transporter activity	37	5	5.01	0.09639
GO:0001085	RNA polymerase II transcription factor binding	75	12	10.15	0.0967
GO:0017081	chloride channel regulator activity	10	0	1.35	0.09671
GO:0003876	AMP deaminase activity	7	0	0.95	0.09693
GO:0047623	adenosine-phosphate deaminase activity	7	0	0.95	0.09693
GO:0004145	diamine N-acetyltransferase activity	6	3	0.81	0.09699
GO:0046625	sphingolipid binding	9	4	1.22	0.09766
GO:0016802	trialkylsulfonium hydrolase activity	8	0	1.08	0.09782
GO:0004013	adenosylhomocysteinase activity	8	0	1.08	0.09782
GO:0008271	secondary active sulfate transmembrane transporter activity	16	3	2.17	0.09809
GO:0015116	sulfate transmembrane transporter activity	16	3	2.17	0.09809
GO:0003708	retinoic acid receptor activity	77	19	10.42	0.09866
GO:0016616	oxidoreductase activity, acting on the CH-OH group of donors, NAD or NADP as acceptor	152	30	20.58	0.09939
GO:0005344	oxygen transporter activity	32	3	4.33	0.09954
GO:0016810	hydrolase activity, acting on carbon-nitrogen (but not peptide) bonds	164	27	22.2	0.09955
GO:0016875	ligase activity, forming carbon-oxygen bonds	86	28	11.64	0.10028
GO:0016876	ligase activity, forming aminoacyl-tRNA and related compounds	86	28	11.64	0.10028
GO:0050251	retinol isomerase activity	12	2	1.62	0.10034
GO:0005178	integrin binding	18	3	2.44	0.10133
GO:0001046	core promoter sequence-specific DNA binding	44	7	5.96	0.10293
GO:0004478	methionine adenosyltransferase activity	6	0	0.81	0.10349
GO:0030296	protein tyrosine kinase activator activity	8	1	1.08	0.10443
GO:0030297	transmembrane receptor protein tyrosine kinase activator activity	8	1	1.08	0.10443
GO:0033691	sialic acid binding	8	1	1.08	0.10443
GO:0035374	chondroitin sulfate binding	8	1	1.08	0.10443
GO:0042562	hormone binding	121	28	16.38	0.10464
GO:0019905	syntaxin binding	29	1	3.93	0.10536
GO:0046915	transition metal ion transmembrane transporter activity	57	20	7.72	0.10666
GO:0008187	poly-pyrimidine tract binding	46	4	6.23	0.11069
GO:0070492	oligosaccharide binding	27	6	3.66	0.11098
GO:0033829	O-fucosylpeptide 3-beta-N-acetylglucosaminyltransferase activity	6	3	0.81	0.11183
GO:0042288	MHC class I protein binding	7	2	0.95	0.11225
GO:0031014	troponin T binding	20	1	2.71	0.1129
GO:0005338	nucleotide-sugar transmembrane transporter activity	7	1	0.95	0.11309
GO:0003824	catalytic activity	12814	1940	1734.81	0.11333
GO:0036002	pre-mRNA binding	6	0	0.81	0.11343
GO:0004666	prostaglandin-endoperoxide synthase activity	8	4	1.08	0.11404
GO:0005351	sugar:proton symporter activity	9	1	1.22	0.11454
GO:0005402	cation:sugar symporter activity	9	1	1.22	0.11454
GO:0015295	solute:proton symporter activity	9	1	1.22	0.11454
GO:0016812	hydrolase activity, acting on carbon-nitrogen (but not peptide) bonds, in cyclic amides	16	1	2.17	0.11457
GO:0043130	ubiquitin binding	119	16	16.11	0.11574
GO:0015924	mannosyl-oligosaccharide mannosidase activity	22	2	2.98	0.11689
GO:0004571	mannosyl-oligosaccharide 1,2-alpha-mannosidase activity	22	2	2.98	0.11689
GO:0051427	hormone receptor binding	181	29	24.5	0.11752
GO:0030695	GTPase regulator activity	496	83	67.15	0.1177
GO:0016829	lyase activity	279	54	37.77	0.12093
GO:0016778	diphosphotransferase activity	7	1	0.95	0.12101
GO:0030284	estrogen receptor activity	19	5	2.57	0.12149
GO:0031996	thioesterase binding	35	10	4.74	0.12236
GO:0005544	calcium-dependent phospholipid binding	35	8	4.74	0.12278
GO:0052813	phosphatidylinositol bisphosphate kinase activity	13	2	1.76	0.12385
GO:0046934	phosphatidylinositol-4,5-bisphosphate 3-kinase activity	13	2	1.76	0.12385
GO:0004806	triglyceride lipase activity	11	3	1.49	0.12399
GO:0016709	oxidoreductase activity, acting on paired donors, with incorporation or reduction of molecular oxygen, NAD(P)H as one donor, and incorporation of one atom of oxygen	38	6	5.14	0.12433
GO:0003884	D-amino-acid oxidase activity	6	1	0.81	0.12541
GO:0004652	polynucleotide adenylyltransferase activity	15	1	2.03	0.1256
GO:0005159	insulin-like growth factor receptor binding	40	5	5.42	0.12656
GO:0035174	histone serine kinase activity	30	7	4.06	0.12786
GO:0000993	RNA polymerase II core binding	18	4	2.44	0.12798
GO:0070063	RNA polymerase binding	18	4	2.44	0.12798
GO:0001098	basal transcription machinery binding	18	4	2.44	0.12798
GO:0001099	basal RNA polymerase II transcription machinery binding	18	4	2.44	0.12798
GO:0043175	RNA polymerase core enzyme binding	18	4	2.44	0.12798
GO:0051787	misfolded protein binding	11	4	1.49	0.12801
GO:0017089	glycolipid transporter activity	6	1	0.81	0.12878
GO:0005184	neuropeptide hormone activity	9	0	1.22	0.12907
GO:0016787	hydrolase activity	5395	791	730.4	0.12939
GO:0002161	aminoacyl-tRNA editing activity	17	5	2.3	0.13093
GO:0001595	angiotensin receptor activity	289	53	39.13	0.13204
GO:0016814	hydrolase activity, acting on carbon-nitrogen (but not peptide) bonds, in cyclic amidines	43	6	5.82	0.13292
GO:0019894	kinesin binding	60	8	8.12	0.13301
GO:0030545	receptor regulator activity	68	11	9.21	0.13307
GO:0030246	carbohydrate binding	302	46	40.89	0.13313
GO:0005484	SNAP receptor activity	26	4	3.52	0.13382
GO:0004994	somatostatin receptor activity	13	1	1.76	0.13498
GO:0051020	GTPase binding	324	52	43.86	0.13536
GO:0019787	small conjugating protein transferase activity	53	16	7.18	0.13543
GO:0030546	receptor activator activity	56	8	7.58	0.13673
GO:0033764	steroid dehydrogenase activity, acting on the CH-OH group of donors, NAD or NADP as acceptor	28	3	3.79	0.13726
GO:0005048	signal sequence binding	22	3	2.98	0.13764
GO:0035257	nuclear hormone receptor binding	175	29	23.69	0.13824
GO:0016918	retinal binding	9	0	1.22	0.13962
GO:0016175	superoxide-generating NADPH oxidase activity	8	2	1.08	0.14042
GO:0050664	oxidoreductase activity, acting on NAD(P)H, oxygen as acceptor	8	2	1.08	0.14042
GO:0015379	potassium:chloride symporter activity	11	1	1.49	0.14143
GO:0017153	sodium:dicarboxylate symporter activity	23	1	3.11	0.14153
GO:0016538	cyclin-dependent protein serine/threonine kinase regulator activity	16	6	2.17	0.14163
GO:0005089	Rho guanyl-nucleotide exchange factor activity	179	22	24.23	0.14449
GO:0019825	oxygen binding	30	3	4.06	0.14487
GO:0003690	double-stranded DNA binding	251	27	33.98	0.14488
GO:0030306	ADP-ribosylation factor binding	12	5	1.62	0.14498
GO:0030295	protein kinase activator activity	38	2	5.14	0.14697
GO:0035175	histone kinase activity (H3-S10 specific)	29	7	3.93	0.14738
GO:0016776	phosphotransferase activity, phosphate group as acceptor	35	8	4.74	0.14903
GO:0004869	cysteine-type endopeptidase inhibitor activity	86	19	11.64	0.14996
GO:0016747	transferase activity, transferring acyl groups other than amino-acyl groups	203	37	27.48	0.15013
GO:0043014	alpha-tubulin binding	15	3	2.03	0.15223
GO:0031491	nucleosome binding	8	2	1.08	0.15309
GO:0008134	transcription factor binding	730	115	98.83	0.15334
GO:0008424	glycoprotein 6-alpha-L-fucosyltransferase activity	8	0	1.08	0.15354
GO:0046921	alpha-(1->6)-fucosyltransferase activity	8	0	1.08	0.15354
GO:0048407	platelet-derived growth factor binding	8	1	1.08	0.15394
GO:0043548	phosphatidylinositol 3-kinase binding	30	8	4.06	0.15571
GO:0005201	extracellular matrix structural constituent	88	12	11.91	0.15585
GO:0045295	gamma-catenin binding	32	3	4.33	0.15619
GO:0046933	proton-transporting ATP synthase activity, rotational mechanism	20	5	2.71	0.15675
GO:0048018	receptor agonist activity	9	3	1.22	0.15727
GO:0052689	carboxylic ester hydrolase activity	89	17	12.05	0.15727
GO:0005086	ARF guanyl-nucleotide exchange factor activity	29	2	3.93	0.15945
GO:0031625	ubiquitin protein ligase binding	120	9	16.25	0.1602
GO:0044389	small conjugating protein ligase binding	120	9	16.25	0.1602
GO:0045294	alpha-catenin binding	19	0	2.57	0.16032
GO:0042171	lysophosphatidic acid acyltransferase activity	12	4	1.62	0.1604
GO:0071617	lysophospholipid acyltransferase activity	12	4	1.62	0.1604
GO:0003873	6-phosphofructo-2-kinase activity	21	5	2.84	0.16059
GO:0005113	patched binding	18	5	2.44	0.16072
GO:0001158	enhancer sequence-specific DNA binding	31	3	4.2	0.16161
GO:0008013	beta-catenin binding	129	18	17.46	0.16249
GO:0004003	ATP-dependent DNA helicase activity	32	4	4.33	0.16264
GO:0016779	nucleotidyltransferase activity	173	29	23.42	0.16318
GO:0032451	demethylase activity	64	7	8.66	0.16388
GO:0000975	regulatory region DNA binding	621	91	84.07	0.16425
GO:0001067	regulatory region nucleic acid binding	621	91	84.07	0.16425
GO:0004939	beta-adrenergic receptor activity	11	1	1.49	0.16476
GO:0004803	transposase activity	11	3	1.49	0.16483
GO:0004499	N,N-dimethylaniline monooxygenase activity	8	1	1.08	0.16538
GO:0000062	fatty-acyl-CoA binding	19	5	2.57	0.1669
GO:0008757	S-adenosylmethionine-dependent methyltransferase activity	178	16	24.1	0.1687
GO:0016651	oxidoreductase activity, acting on NAD(P)H	68	17	9.21	0.16928
GO:0005416	cation:amino acid symporter activity	9	2	1.22	0.16933
GO:0005283	sodium:amino acid symporter activity	9	2	1.22	0.16933
GO:0004470	malic enzyme activity	8	3	1.08	0.16975
GO:0043274	phospholipase binding	9	3	1.22	0.16994
GO:0019955	cytokine binding	59	10	7.99	0.17204
GO:0000980	RNA polymerase II distal enhancer sequence-specific DNA binding	12	1	1.62	0.17372
GO:0035252	UDP-xylosyltransferase activity	10	1	1.35	0.17519
GO:0042285	xylosyltransferase activity	10	1	1.35	0.17519
GO:0001883	purine nucleoside binding	4046	601	547.76	0.17545
GO:0008514	organic anion transmembrane transporter activity	162	19	21.93	0.17551
GO:0004945	angiotensin type II receptor activity	24	7	3.25	0.17574
GO:0017154	semaphorin receptor activity	15	5	2.03	0.17599
GO:0016941	natriuretic peptide receptor activity	11	2	1.49	0.17703
GO:0016894	endonuclease activity, active with either ribo- or deoxyribonucleic acids and producing 3'-phosphomonoesters	7	3	0.95	0.17732
GO:0003677	DNA binding	3399	424	460.17	0.17773
GO:0033218	amide binding	119	20	16.11	0.17875
GO:0042277	peptide binding	119	20	16.11	0.17875
GO:0004396	hexokinase activity	10	5	1.35	0.17964
GO:0030414	peptidase inhibitor activity	249	47	33.71	0.17984
GO:0005092	GDP-dissociation inhibitor activity	25	7	3.38	0.18048
GO:0042287	MHC protein binding	10	2	1.35	0.18067
GO:0032452	histone demethylase activity	62	7	8.39	0.1813
GO:0016757	transferase activity, transferring glycosyl groups	546	80	73.92	0.18159
GO:0010181	FMN binding	26	4	3.52	0.18227
GO:0045499	chemorepellent activity	50	6	6.77	0.18395
GO:0030374	ligand-dependent nuclear receptor transcription coactivator activity	74	6	10.02	0.18459
GO:0016410	N-acyltransferase activity	90	19	12.18	0.18459
GO:0032550	purine ribonucleoside binding	4045	601	547.63	0.18467
GO:0008047	enzyme activator activity	512	75	69.32	0.18492
GO:0016884	carbon-nitrogen ligase activity, with glutamine as amido-N-donor	23	3	3.11	0.18571
GO:0005237	inhibitory extracellular ligand-gated ion channel activity	56	5	7.58	0.18597
GO:0016933	extracellular-glycine-gated ion channel activity	56	5	7.58	0.18597
GO:0016934	extracellular-glycine-gated chloride channel activity	56	5	7.58	0.18597
GO:0008092	cytoskeletal protein binding	1840	256	249.11	0.18662
GO:0050308	sugar-phosphatase activity	31	7	4.2	0.18734
GO:0019203	carbohydrate phosphatase activity	31	7	4.2	0.18734
GO:0071949	FAD binding	8	1	1.08	0.18808
GO:0043140	ATP-dependent 3'-5' DNA helicase activity	9	1	1.22	0.18819
GO:0048365	Rac GTPase binding	40	11	5.42	0.18838
GO:0008144	drug binding	35	8	4.74	0.18961
GO:0008094	DNA-dependent ATPase activity	60	7	8.12	0.19036
GO:0032553	ribonucleotide binding	4096	605	554.53	0.19199
GO:0019207	kinase regulator activity	111	12	15.03	0.19452
GO:0004823	leucine-tRNA ligase activity	8	3	1.08	0.19494
GO:1901677	phosphate transmembrane transporter activity	31	5	4.2	0.19502
GO:0070410	co-SMAD binding	16	0	2.17	0.19587
GO:0004697	protein kinase C activity	64	5	8.66	0.19629
GO:0005342	organic acid transmembrane transporter activity	116	14	15.7	0.19732
GO:0032404	mismatch repair complex binding	8	1	1.08	0.19818
GO:0016813	hydrolase activity, acting on carbon-nitrogen (but not peptide) bonds, in linear amidines	10	4	1.35	0.19891
GO:0003700	sequence-specific DNA binding transcription factor activity	1809	254	244.91	0.19916
GO:0061134	peptidase regulator activity	288	53	38.99	0.19962
GO:0035639	purine ribonucleoside triphosphate binding	3982	594	539.1	0.20109
GO:0017080	sodium channel regulator activity	19	0	2.57	0.20124
GO:0004047	aminomethyltransferase activity	7	0	0.95	0.20322
GO:0033293	monocarboxylic acid binding	71	14	9.61	0.20424
GO:0019992	diacylglycerol binding	7	3	0.95	0.20569
GO:0019210	kinase inhibitor activity	22	5	2.98	0.20593
GO:0001071	nucleic acid binding transcription factor activity	1811	254	245.18	0.20758
GO:0016805	dipeptidase activity	12	1	1.62	0.20838
GO:0043539	protein serine/threonine kinase activator activity	18	1	2.44	0.20905
GO:0001609	G-protein coupled adenosine receptor activity	10	4	1.35	0.20906
GO:0005099	Ras GTPase activator activity	132	20	17.87	0.20934
GO:0032549	ribonucleoside binding	4052	601	548.58	0.20958
GO:0016628	oxidoreductase activity, acting on the CH-CH group of donors, NAD or NADP as acceptor	25	4	3.38	0.20976
GO:0016885	ligase activity, forming carbon-carbon bonds	14	7	1.9	0.20998
GO:0043027	cysteine-type endopeptidase inhibitor activity involved in apoptotic process	60	14	8.12	0.21038
GO:0003896	DNA primase activity	11	2	1.49	0.21041
GO:0001882	nucleoside binding	4056	601	549.12	0.21046
GO:0016744	transferase activity, transferring aldehyde or ketonic groups	7	3	0.95	0.21048
GO:0004849	uridine kinase activity	13	0	1.76	0.21084
GO:0004367	glycerol-3-phosphate dehydrogenase [NAD+] activity	8	3	1.08	0.21187
GO:0019887	protein kinase regulator activity	97	8	13.13	0.2122
GO:0008171	O-methyltransferase activity	23	4	3.11	0.21287
GO:0035326	enhancer binding	33	3	4.47	0.21385
GO:0008238	exopeptidase activity	154	29	20.85	0.21456
GO:0070915	lysophosphatidic acid receptor activity	15	2	2.03	0.21462
GO:0048029	monosaccharide binding	81	18	10.97	0.21483
GO:0070735	protein-glycine ligase activity	7	0	0.95	0.21498
GO:0005523	tropomyosin binding	15	1	2.03	0.21567
GO:0043168	anion binding	5548	817	751.11	0.21663
GO:0019838	growth factor binding	298	58	40.34	0.2174
GO:0019841	retinol binding	10	0	1.35	0.21803
GO:0008135	translation factor activity, nucleic acid binding	220	25	29.78	0.21992
GO:0017095	heparan sulfate 6-O-sulfotransferase activity	7	2	0.95	0.22026
GO:0019206	nucleoside kinase activity	21	1	2.84	0.22041
GO:0030276	clathrin binding	28	3	3.79	0.22048
GO:0008607	phosphorylase kinase regulator activity	7	0	0.95	0.22123
GO:0015923	mannosidase activity	36	4	4.87	0.22362
GO:0008060	ARF GTPase activator activity	55	9	7.45	0.22372
GO:0008781	N-acylneuraminate cytidylyltransferase activity	6	1	0.81	0.22453
GO:0005096	GTPase activator activity	383	59	51.85	0.22497
GO:0051087	chaperone binding	15	2	2.03	0.22501
GO:0016780	phosphotransferase activity, for other substituted phosphate groups	34	5	4.6	0.22577
GO:0000982	RNA polymerase II core promoter proximal region sequence-specific DNA binding transcription factor activity	116	11	15.7	0.22578
[truncated: 925 more rows]
